# Supplementary material
Source: publisher figshare collection journal article supplement (https://acs.figshare.com/ndownloader/files/3736267)
Supplement: Supplementary file 1 [file 3736267]

data_sa4224
_audit_creation_date              2015-07-08
_audit_creation_method
;
Olex2 1.2
(compiled 2015.01.19 svn.r3143 for OlexSys, GUI svn.r4992)
;
_shelxl_version_number            2013-4
_publ_contact_author_address      ?
_publ_contact_author_email        ?
_publ_contact_author_name         ''
_publ_contact_author_phone        ?
_publ_section_references
;
Dolomanov, O.V., Bourhis, L.J., Gildea, R.J, Howard, J.A.K. & Puschmann, H.
 (2009), J. Appl. Cryst. 42, 339-341.

Sheldrick, G.M. (2008). Acta Cryst. A64, 112-122.
;
_chemical_name_common             ?
_chemical_name_systematic
;
 ?
;
_chemical_formula_moiety          'C17 H13 Br2 N O5 S, C H2 Cl2'
_chemical_formula_sum             'C18 H15 Br2 Cl2 N O5 S'
_chemical_formula_weight          588.09
_chemical_absolute_configuration  ad
_chemical_melting_point           ?
loop_
  _atom_type_symbol
  _atom_type_description
  _atom_type_scat_dispersion_real
  _atom_type_scat_dispersion_imag
  _atom_type_scat_source
 'C' 'C' 0.0033 0.0016 'International Tables Vol C Tables 4.2.6.8 and 6.1.1.4'
 'H' 'H' 0.0000 0.0000 'International Tables Vol C Tables 4.2.6.8 and 6.1.1.4'
 'Br' 'Br' -0.2901 2.4595
 'International Tables Vol C Tables 4.2.6.8 and 6.1.1.4'
 'Cl' 'Cl' 0.1484 0.1585 'International Tables Vol C Tables 4.2.6.8 and 6.1.1.4'
 'N' 'N' 0.0061 0.0033 'International Tables Vol C Tables 4.2.6.8 and 6.1.1.4'
 'O' 'O' 0.0106 0.0060 'International Tables Vol C Tables 4.2.6.8 and 6.1.1.4'
 'S' 'S' 0.1246 0.1234 'International Tables Vol C Tables 4.2.6.8 and 6.1.1.4'

_shelx_space_group_comment
;
The symmetry employed for this shelxl refinement is uniquely defined
by the following loop, which should always be used as a source of
symmetry information in preference to the above space-group names.
They are only intended as comments.
;
_space_group_crystal_system       'monoclinic'
_space_group_IT_number            4
_space_group_name_H-M_alt         'P 1 21 1'
_space_group_name_Hall            'P 2yb'
loop_
  _space_group_symop_operation_xyz
 'x, y, z'
 '-x, y+1/2, -z'

_cell_length_a                    11.974(2)
_cell_length_b                    5.7044(11)
_cell_length_c                    15.451(3)
_cell_angle_alpha                 90
_cell_angle_beta                  95.49(3)
_cell_angle_gamma                 90
_cell_volume                      1050.5(4)
_cell_formula_units_Z             2
_cell_measurement_reflns_used     3557
_cell_measurement_temperature     173.1500
_cell_measurement_theta_max       27.4662
_cell_measurement_theta_min       1.7085
_shelx_estimated_absorpt_T_max    ?
_shelx_estimated_absorpt_T_min    ?
_exptl_absorpt_coefficient_mu     4.243
_exptl_absorpt_correction_T_max   1.0000
_exptl_absorpt_correction_T_min   0.4015
_exptl_absorpt_correction_type    multi-scan
_exptl_absorpt_process_details    'CrystalClear (Rigaku Inc., 2007)'
_exptl_crystal_colour             Colorless
_exptl_crystal_density_diffrn     1.859
_exptl_crystal_density_meas       ?
_exptl_crystal_density_method     ?
_exptl_crystal_description        plate
_exptl_crystal_F_000              580
_exptl_crystal_size_max           0.35
_exptl_crystal_size_mid           0.17
_exptl_crystal_size_min           0.07
_exptl_special_details
;
 ?
;
_exptl_transmission_factor_max    ?
_exptl_transmission_factor_min    ?
_diffrn_reflns_av_R_equivalents   0.0397
_diffrn_reflns_av_unetI/netI      0.0393
_diffrn_reflns_Laue_measured_fraction_full 0.997
_diffrn_reflns_Laue_measured_fraction_max 0.992
_diffrn_reflns_limit_h_max        15
_diffrn_reflns_limit_h_min        -15
_diffrn_reflns_limit_k_max        7
_diffrn_reflns_limit_k_min        -7
_diffrn_reflns_limit_l_max        19
_diffrn_reflns_limit_l_min        -19
_diffrn_reflns_number             11926
_diffrn_reflns_point_group_measured_fraction_full 0.985
_diffrn_reflns_point_group_measured_fraction_max 0.977
_diffrn_reflns_theta_full         26.000
_diffrn_reflns_theta_max          27.433
_diffrn_reflns_theta_min          1.324
_diffrn_ambient_temperature       173.1500
_diffrn_detector_area_resol_mean  28.5714
_diffrn_measured_fraction_theta_full 0.997
_diffrn_measured_fraction_theta_max 0.992
_diffrn_measurement_details
;
scan:
	Number of images: 360
	           Slice: -110.0000 - 70.0000
	     Image width: 0.5000
	        Exp time: 8.0000
	   Rotation axis: Omega
	           Omega: 0.0000
	             Chi: 45.0000
	             Phi: 90.0000
	             XTD: 45.1714
	          2theta: -20.1487
scan:
	Number of images: 360
	           Slice: -110.0000 - 70.0000
	     Image width: 0.5000
	        Exp time: 8.0000
	   Rotation axis: Omega
	           Omega: 0.0000
	             Chi: 45.0000
	             Phi: 270.0000
	             XTD: 45.1714
	          2theta: -20.1487
scan:
	Number of images: 344
	           Slice: -110.0000 - 62.0000
	     Image width: 0.5000
	        Exp time: 8.0000
	   Rotation axis: Omega
	           Omega: 0.0000
	             Chi: 45.0000
	             Phi: 180.0000
	             XTD: 45.1714
	          2theta: -20.1487
;
_diffrn_measurement_device
;
Saturn724+ (2x2 bin mode)
;
_diffrn_measurement_device_details
;
AFC10: Fixed Chi 2 circle
;
_diffrn_measurement_device_type   'Saturn724+ CCD' 
_diffrn_measurement_method        '\w scans at fixed \c = 45\%'
_diffrn_number_total              2634
_diffrn_orient_matrix_type        d*Trek
_diffrn_orient_matrix_UB_11       0.0834
_diffrn_orient_matrix_UB_12       0.0077
_diffrn_orient_matrix_UB_13       -0.0039
_diffrn_orient_matrix_UB_21       -0.0113
_diffrn_orient_matrix_UB_22       0.1594
_diffrn_orient_matrix_UB_23       0.0721
_diffrn_orient_matrix_UB_31       0.0114
_diffrn_orient_matrix_UB_32       -0.0257
_diffrn_orient_matrix_UB_33       0.0586
_diffrn_radiation_detector        CCD
_diffrn_radiation_monochromator   'Graphite Monochromator'
_diffrn_radiation_type            MoK\a
_diffrn_radiation_wavelength      0.71073
_diffrn_source                    'Sealed Tube'
_diffrn_source_current            30.0000
_diffrn_source_power              1.5000
_diffrn_source_voltage            50.0000
_diffrn_special_details
;
 ?
;
_reflns_Friedel_coverage          0.788
_reflns_Friedel_fraction_full     0.970
_reflns_Friedel_fraction_max      0.958
_reflns_number_gt                 4555
_reflns_number_total              4694
_reflns_special_details
;
 Reflections were merged by SHELXL according to the crystal
 class for the calculation of statistics and refinement.
 
 _reflns_Friedel_fraction is defined as the number of unique
 Friedel pairs measured divided by the number that would be
 possible theoretically, ignoring centric projections and
 systematic absences.
;
_reflns_threshold_expression      'I > 2\s(I)'
_computing_cell_refinement        'CrystalClear (Rigaku Inc., 2007)'
_computing_data_collection        'CrystalClear (Rigaku Inc., 2007)'
_computing_data_reduction         'CrystalClear (Rigaku Inc., 2007)'
_computing_molecular_graphics     'Olex2 (Dolomanov et al., 2013)'
_computing_publication_material   'Olex2 (Dolomanov et al., 2013)'
_computing_structure_refinement   'ShelXL (Sheldrick, 2013)'
_computing_structure_solution
;
 'XS (Sheldrick, 2013)'
;
_refine_diff_density_max          1.239
_refine_diff_density_min          -1.053
_refine_diff_density_rms          0.119
_refine_ls_abs_structure_details
;
 Flack x determined using 1876 quotients [(I+)-(I-)]/[(I+)+(I-)]
 (Parsons and Flack (2004), Acta Cryst. A60, s61).
;
_refine_ls_abs_structure_Flack    -0.013(6)
_refine_ls_extinction_coef        .
_refine_ls_extinction_method      none
_refine_ls_goodness_of_fit_ref    1.076
_refine_ls_hydrogen_treatment     constr
_refine_ls_matrix_type            full
_refine_ls_number_parameters      263
_refine_ls_number_reflns          4694
_refine_ls_number_restraints      1
_refine_ls_R_factor_all           0.0480
_refine_ls_R_factor_gt            0.0465
_refine_ls_restrained_S_all       1.076
_refine_ls_shift/su_max           0.001
_refine_ls_shift/su_mean          0.000
_refine_ls_structure_factor_coef  Fsqd
_refine_ls_weighting_details
'w=1/[\s^2^(Fo^2^)+(0.0684P)^2^+1.8160P] where P=(Fo^2^+2Fc^2^)/3'
_refine_ls_weighting_scheme       calc
_refine_ls_wR_factor_gt           0.1222
_refine_ls_wR_factor_ref          0.1248
_refine_special_details
;
 ?
;
_olex2_refinement_description
;
1. Fixed Uiso
 At 1.2 times of:
  All C(H) groups, All C(H,H) groups
 At 1.5 times of:
  All C(H,H,H) groups
2.a Ternary CH refined with riding coordinates:
 C7(H7)
2.b Secondary CH2 refined with riding coordinates:
 C9(H9A,H9B), C18(H18A,H18B)
2.c Aromatic/amide H refined with riding coordinates:
 C2(H2), C5(H5), C6(H6), C12(H12), C13(H13), C15(H15), C16(H16)
2.d Idealised Me refined as rotating group:
 C17(H17A,H17B,H17C)
;
_atom_sites_solution_hydrogens    geom
_atom_sites_solution_primary      ?
_atom_sites_solution_secondary    ?
loop_
  _atom_site_label
  _atom_site_type_symbol
  _atom_site_fract_x
  _atom_site_fract_y
  _atom_site_fract_z
  _atom_site_U_iso_or_equiv
  _atom_site_adp_type
  _atom_site_occupancy
  _atom_site_site_symmetry_order
  _atom_site_calc_flag
  _atom_site_refinement_flags_posn
  _atom_site_refinement_flags_adp
  _atom_site_refinement_flags_occupancy
  _atom_site_disorder_assembly
  _atom_site_disorder_group
 Br1 Br 0.15906(5) -0.14616(14) 0.25573(4) 0.0342(2) Uani 1 1 d . . . . .
 Br2 Br -0.15328(7) -0.07568(15) -0.08267(4) 0.0399(2) Uani 1 1 d . . . . .
 S1 S -0.23622(12) -0.0812(3) 0.36453(10) 0.0223(3) Uani 1 1 d . . . . .
 O1 O -0.0911(4) -0.5205(8) 0.2699(3) 0.0240(9) Uani 1 1 d . . . . .
 O2 O -0.0157(4) -0.5149(9) 0.4620(3) 0.0276(10) Uani 1 1 d . . . . .
 O3 O -0.1727(4) -0.3944(9) 0.5186(3) 0.0310(11) Uani 1 1 d . . . . .
 O4 O -0.2280(4) 0.0021(9) 0.2778(3) 0.0266(10) Uani 1 1 d . . . . .
 O5 O -0.2342(4) 0.0807(9) 0.4357(4) 0.0325(11) Uani 1 1 d . . . . .
 N1 N -0.1236(5) -0.2599(10) 0.3842(3) 0.0220(11) Uani 1 1 d . . . . .
 C1 C -0.1345(6) -0.2234(13) 0.0280(4) 0.0286(14) Uani 1 1 d . . . . .
 C2 C -0.0717(5) -0.1079(12) 0.0954(4) 0.0266(13) Uani 1 1 d . . . . .
 H2 H -0.0375 0.0355 0.0869 0.032 Uiso 1 1 calc R . . . .
 C3 C -0.0626(5) -0.2176(12) 0.1765(4) 0.0235(13) Uani 1 1 d . . . . .
 C4 C -0.1107(6) -0.4332(12) 0.1863(4) 0.0231(13) Uani 1 1 d . . . . .
 C5 C -0.1731(6) -0.5507(13) 0.1199(4) 0.0272(13) Uani 1 1 d . . . . .
 H5 H -0.2065 -0.6946 0.1291 0.033 Uiso 1 1 calc R . . . .
 C6 C -0.1836(7) -0.4416(14) 0.0380(5) 0.0326(15) Uani 1 1 d . . . . .
 H6 H -0.2231 -0.5148 -0.0092 0.039 Uiso 1 1 calc R . . . .
 C7 C -0.0052(5) -0.1418(13) 0.2613(4) 0.0234(11) Uani 1 1 d . . . . .
 H7 H -0.0307 0.0142 0.2773 0.028 Uiso 1 1 calc R . . . .
 C8 C -0.0430(5) -0.3335(11) 0.3254(4) 0.0223(12) Uani 1 1 d . . . . .
 C9 C 0.0465(6) -0.4366(13) 0.3907(4) 0.0261(14) Uani 1 1 d . . . . .
 H9A H 0.0842 -0.5669 0.3656 0.031 Uiso 1 1 calc R . . . .
 H9B H 0.1017 -0.3191 0.4103 0.031 Uiso 1 1 calc R . . . .
 C10 C -0.1108(5) -0.3891(12) 0.4616(4) 0.0238(13) Uani 1 1 d . . . . .
 C11 C -0.3541(5) -0.2644(12) 0.3653(4) 0.0231(12) Uani 1 1 d . . . . .
 C12 C -0.3597(6) -0.4715(13) 0.3178(5) 0.0298(14) Uani 1 1 d . . . . .
 H12 H -0.2987 -0.5231 0.2900 0.036 Uiso 1 1 calc R . . . .
 C13 C -0.4587(6) -0.5992(14) 0.3130(5) 0.0337(15) Uani 1 1 d . . . . .
 H13 H -0.4637 -0.7373 0.2809 0.040 Uiso 1 1 calc R . . . .
 C14 C -0.5501(6) -0.5271(14) 0.3545(5) 0.0324(16) Uani 1 1 d . . . . .
 C15 C -0.5422(6) -0.3190(14) 0.4012(5) 0.0334(16) Uani 1 1 d . . . . .
 H15 H -0.6034 -0.2684 0.4291 0.040 Uiso 1 1 calc R . . . .
 C16 C -0.4454(6) -0.1848(13) 0.4074(4) 0.0294(14) Uani 1 1 d . . . . .
 H16 H -0.4412 -0.0453 0.4386 0.035 Uiso 1 1 calc R . . . .
 C17 C -0.6559(6) -0.6675(18) 0.3472(7) 0.049(2) Uani 1 1 d . . . . .
 H17A H -0.6904 -0.6601 0.2885 0.074 Uiso 1 1 calc GR . . . .
 H17B H -0.7064 -0.6049 0.3859 0.074 Uiso 1 1 calc GR . . . .
 H17C H -0.6389 -0.8276 0.3623 0.074 Uiso 1 1 calc GR . . . .
 Cl1 Cl 0.5798(12) 0.048(3) 0.0466(9) 0.294(7) Uani 1 1 d . . . . .
 Cl2 Cl 0.4249(6) -0.121(2) 0.1526(4) 0.176(3) Uani 1 1 d . . . . .
 C18 C 0.5514(12) -0.130(4) 0.1164(10) 0.106(6) Uani 1 1 d . . . . .
 H18A H 0.6065 -0.1112 0.1662 0.127 Uiso 1 1 calc R . . . .
 H18B H 0.5616 -0.2860 0.0934 0.127 Uiso 1 1 calc R . . . .

loop_
  _atom_site_aniso_label
  _atom_site_aniso_U_11
  _atom_site_aniso_U_22
  _atom_site_aniso_U_33
  _atom_site_aniso_U_23
  _atom_site_aniso_U_13
  _atom_site_aniso_U_12
 Br1 0.0241(3) 0.0475(4) 0.0316(3) -0.0014(3) 0.0052(2) -0.0116(3)
 Br2 0.0455(4) 0.0489(4) 0.0253(3) 0.0077(3) 0.0031(3) 0.0032(3)
 S1 0.0206(7) 0.0196(6) 0.0266(7) -0.0019(6) 0.0018(5) 0.0006(6)
 O1 0.030(2) 0.019(2) 0.024(2) -0.0014(17) 0.0042(18) -0.0041(18)
 O2 0.025(2) 0.031(3) 0.027(2) 0.0086(19) 0.0037(18) 0.0045(19)
 O3 0.035(3) 0.034(3) 0.025(2) 0.000(2) 0.008(2) -0.002(2)
 O4 0.022(2) 0.026(2) 0.031(2) 0.0066(19) 0.0016(18) -0.0002(19)
 O5 0.031(3) 0.027(2) 0.040(3) -0.011(2) 0.004(2) 0.001(2)
 N1 0.021(2) 0.024(3) 0.020(2) -0.004(2) -0.001(2) 0.000(2)
 C1 0.030(3) 0.035(4) 0.021(3) 0.005(3) 0.004(3) 0.004(3)
 C2 0.028(3) 0.027(4) 0.026(3) 0.000(3) 0.008(2) -0.001(3)
 C3 0.019(3) 0.025(3) 0.027(3) 0.000(2) 0.004(2) -0.001(2)
 C4 0.024(3) 0.026(3) 0.020(3) -0.002(2) 0.005(2) 0.003(3)
 C5 0.026(3) 0.025(3) 0.031(3) -0.001(3) 0.002(2) -0.003(3)
 C6 0.035(4) 0.035(4) 0.027(3) -0.007(3) 0.000(3) -0.001(3)
 C7 0.021(3) 0.025(3) 0.024(3) 0.003(3) 0.002(2) -0.005(3)
 C8 0.023(3) 0.022(3) 0.023(3) -0.004(2) 0.006(2) -0.004(2)
 C9 0.023(3) 0.031(3) 0.025(3) 0.003(3) 0.008(3) 0.001(3)
 C10 0.023(3) 0.024(3) 0.024(3) -0.001(2) 0.001(2) -0.003(2)
 C11 0.020(3) 0.024(3) 0.025(3) 0.002(2) 0.002(2) 0.003(2)
 C12 0.022(3) 0.026(3) 0.042(4) -0.001(3) 0.006(3) -0.001(3)
 C13 0.027(3) 0.029(4) 0.045(4) -0.002(3) 0.003(3) -0.007(3)
 C14 0.021(3) 0.035(4) 0.040(4) 0.017(3) -0.001(3) -0.003(3)
 C15 0.026(3) 0.040(4) 0.036(4) 0.010(3) 0.009(3) 0.005(3)
 C16 0.029(3) 0.033(4) 0.028(3) 0.003(3) 0.010(3) 0.003(3)
 C17 0.026(3) 0.047(5) 0.075(6) 0.013(5) 0.005(4) -0.013(4)
 Cl1 0.309(14) 0.269(15) 0.312(15) 0.131(13) 0.066(12) -0.026(12)
 Cl2 0.143(5) 0.269(10) 0.116(4) 0.010(7) 0.006(3) 0.026(7)
 C18 0.080(9) 0.153(18) 0.087(10) -0.006(12) 0.012(7) -0.035(12)

_geom_special_details
;
 All esds (except the esd in the dihedral angle between two l.s. planes)
 are estimated using the full covariance matrix.  The cell esds are taken
 into account individually in the estimation of esds in distances, angles
 and torsion angles; correlations between esds in cell parameters are only
 used when they are defined by crystal symmetry.  An approximate (isotropic)
 treatment of cell esds is used for estimating esds involving l.s. planes.
;
loop_
  _geom_bond_atom_site_label_1
  _geom_bond_atom_site_label_2
  _geom_bond_distance
  _geom_bond_site_symmetry_2
  _geom_bond_publ_flag
 Br1 C7 1.977(6) . ?
 Br2 C1 1.901(7) . ?
 S1 O4 1.434(5) . ?
 S1 O5 1.434(5) . ?
 S1 N1 1.695(6) . ?
 S1 C11 1.757(7) . ?
 O1 C4 1.384(8) . ?
 O1 C8 1.453(8) . ?
 O2 C9 1.458(8) . ?
 O2 C10 1.346(8) . ?
 O3 C10 1.204(8) . ?
 N1 C8 1.449(8) . ?
 N1 C10 1.401(8) . ?
 C1 C2 1.391(10) . ?
 C1 C6 1.391(11) . ?
 C2 H2 0.9300 . ?
 C2 C3 1.395(9) . ?
 C3 C4 1.372(9) . ?
 C3 C7 1.486(9) . ?
 C4 C5 1.383(9) . ?
 C5 H5 0.9300 . ?
 C5 C6 1.406(10) . ?
 C6 H6 0.9300 . ?
 C7 H7 0.9800 . ?
 C7 C8 1.571(9) . ?
 C8 C9 1.518(9) . ?
 C9 H9A 0.9700 . ?
 C9 H9B 0.9700 . ?
 C11 C12 1.389(10) . ?
 C11 C16 1.400(9) . ?
 C12 H12 0.9300 . ?
 C12 C13 1.387(10) . ?
 C13 H13 0.9300 . ?
 C13 C14 1.384(10) . ?
 C14 C15 1.388(12) . ?
 C14 C17 1.493(10) . ?
 C15 H15 0.9300 . ?
 C15 C16 1.384(11) . ?
 C16 H16 0.9300 . ?
 C17 H17A 0.9600 . ?
 C17 H17B 0.9600 . ?
 C17 H17C 0.9600 . ?
 Cl1 C18 1.54(2) . ?
 Cl2 C18 1.664(16) . ?
 C18 H18A 0.9700 . ?
 C18 H18B 0.9700 . ?

loop_
  _geom_angle_atom_site_label_1
  _geom_angle_atom_site_label_2
  _geom_angle_atom_site_label_3
  _geom_angle
  _geom_angle_site_symmetry_1
  _geom_angle_site_symmetry_3
  _geom_angle_publ_flag
 O4 S1 O5 120.4(3) . . ?
 O4 S1 N1 104.0(3) . . ?
 O4 S1 C11 109.3(3) . . ?
 O5 S1 N1 107.2(3) . . ?
 O5 S1 C11 109.4(3) . . ?
 N1 S1 C11 105.5(3) . . ?
 C4 O1 C8 108.0(5) . . ?
 C10 O2 C9 109.1(5) . . ?
 C8 N1 S1 128.9(5) . . ?
 C10 N1 S1 119.3(4) . . ?
 C10 N1 C8 111.0(5) . . ?
 C2 C1 Br2 118.2(5) . . ?
 C2 C1 C6 123.0(6) . . ?
 C6 C1 Br2 118.8(5) . . ?
 C1 C2 H2 121.6 . . ?
 C1 C2 C3 116.7(6) . . ?
 C3 C2 H2 121.6 . . ?
 C2 C3 C7 130.6(6) . . ?
 C4 C3 C2 120.3(6) . . ?
 C4 C3 C7 109.1(6) . . ?
 C3 C4 O1 113.0(6) . . ?
 C3 C4 C5 123.7(6) . . ?
 C5 C4 O1 123.3(6) . . ?
 C4 C5 H5 121.7 . . ?
 C4 C5 C6 116.7(6) . . ?
 C6 C5 H5 121.7 . . ?
 C1 C6 C5 119.6(7) . . ?
 C1 C6 H6 120.2 . . ?
 C5 C6 H6 120.2 . . ?
 Br1 C7 H7 111.0 . . ?
 C3 C7 Br1 109.7(4) . . ?
 C3 C7 H7 111.0 . . ?
 C3 C7 C8 102.5(5) . . ?
 C8 C7 Br1 111.5(4) . . ?
 C8 C7 H7 111.0 . . ?
 O1 C8 C7 105.2(5) . . ?
 O1 C8 C9 108.8(5) . . ?
 N1 C8 O1 109.4(5) . . ?
 N1 C8 C7 116.3(5) . . ?
 N1 C8 C9 99.5(5) . . ?
 C9 C8 C7 117.4(5) . . ?
 O2 C9 C8 104.0(5) . . ?
 O2 C9 H9A 111.0 . . ?
 O2 C9 H9B 111.0 . . ?
 C8 C9 H9A 111.0 . . ?
 C8 C9 H9B 111.0 . . ?
 H9A C9 H9B 109.0 . . ?
 O2 C10 N1 107.9(5) . . ?
 O3 C10 O2 124.3(6) . . ?
 O3 C10 N1 127.8(6) . . ?
 C12 C11 S1 120.1(5) . . ?
 C12 C11 C16 121.3(6) . . ?
 C16 C11 S1 118.3(5) . . ?
 C11 C12 H12 120.9 . . ?
 C13 C12 C11 118.2(7) . . ?
 C13 C12 H12 120.9 . . ?
 C12 C13 H13 119.0 . . ?
 C14 C13 C12 121.9(7) . . ?
 C14 C13 H13 119.0 . . ?
 C13 C14 C15 118.5(6) . . ?
 C13 C14 C17 120.6(8) . . ?
 C15 C14 C17 120.9(7) . . ?
 C14 C15 H15 119.2 . . ?
 C16 C15 C14 121.6(7) . . ?
 C16 C15 H15 119.2 . . ?
 C11 C16 H16 120.8 . . ?
 C15 C16 C11 118.4(7) . . ?
 C15 C16 H16 120.8 . . ?
 C14 C17 H17A 109.5 . . ?
 C14 C17 H17B 109.5 . . ?
 C14 C17 H17C 109.5 . . ?
 H17A C17 H17B 109.5 . . ?
 H17A C17 H17C 109.5 . . ?
 H17B C17 H17C 109.5 . . ?
 Cl1 C18 Cl2 118.9(15) . . ?
 Cl1 C18 H18A 107.6 . . ?
 Cl1 C18 H18B 107.6 . . ?
 Cl2 C18 H18A 107.6 . . ?
 Cl2 C18 H18B 107.6 . . ?
 H18A C18 H18B 107.0 . . ?

loop_
  _geom_torsion_atom_site_label_1
  _geom_torsion_atom_site_label_2
  _geom_torsion_atom_site_label_3
  _geom_torsion_atom_site_label_4
  _geom_torsion
  _geom_torsion_site_symmetry_1
  _geom_torsion_site_symmetry_2
  _geom_torsion_site_symmetry_3
  _geom_torsion_site_symmetry_4
  _geom_torsion_publ_flag
 Br1 C7 C8 O1 -103.5(5) . . . . ?
 Br1 C7 C8 N1 135.4(5) . . . . ?
 Br1 C7 C8 C9 17.7(7) . . . . ?
 Br2 C1 C2 C3 178.0(5) . . . . ?
 Br2 C1 C6 C5 -178.3(6) . . . . ?
 S1 N1 C8 O1 -79.3(7) . . . . ?
 S1 N1 C8 C7 39.6(8) . . . . ?
 S1 N1 C8 C9 166.8(5) . . . . ?
 S1 N1 C10 O2 -179.7(4) . . . . ?
 S1 N1 C10 O3 1.4(10) . . . . ?
 S1 C11 C12 C13 -173.6(6) . . . . ?
 S1 C11 C16 C15 174.1(5) . . . . ?
 O1 C4 C5 C6 -178.7(6) . . . . ?
 O1 C8 C9 O2 -86.3(6) . . . . ?
 O4 S1 N1 C8 -5.7(6) . . . . ?
 O4 S1 N1 C10 -174.4(5) . . . . ?
 O4 S1 C11 C12 62.8(6) . . . . ?
 O4 S1 C11 C16 -110.9(6) . . . . ?
 O5 S1 N1 C8 -134.2(6) . . . . ?
 O5 S1 N1 C10 57.1(6) . . . . ?
 O5 S1 C11 C12 -163.5(6) . . . . ?
 O5 S1 C11 C16 22.9(6) . . . . ?
 N1 S1 C11 C12 -48.5(6) . . . . ?
 N1 S1 C11 C16 137.8(5) . . . . ?
 N1 C8 C9 O2 28.1(6) . . . . ?
 C1 C2 C3 C4 2.4(9) . . . . ?
 C1 C2 C3 C7 -178.5(6) . . . . ?
 C2 C1 C6 C5 1.9(11) . . . . ?
 C2 C3 C4 O1 178.2(6) . . . . ?
 C2 C3 C4 C5 -2.4(10) . . . . ?
 C2 C3 C7 Br1 -68.6(8) . . . . ?
 C2 C3 C7 C8 172.8(7) . . . . ?
 C3 C4 C5 C6 1.9(10) . . . . ?
 C3 C7 C8 O1 13.8(6) . . . . ?
 C3 C7 C8 N1 -107.4(6) . . . . ?
 C3 C7 C8 C9 134.9(6) . . . . ?
 C4 O1 C8 N1 110.6(6) . . . . ?
 C4 O1 C8 C7 -15.0(6) . . . . ?
 C4 O1 C8 C9 -141.6(5) . . . . ?
 C4 C3 C7 Br1 110.6(5) . . . . ?
 C4 C3 C7 C8 -8.0(7) . . . . ?
 C4 C5 C6 C1 -1.6(10) . . . . ?
 C6 C1 C2 C3 -2.2(10) . . . . ?
 C7 C3 C4 O1 -1.1(7) . . . . ?
 C7 C3 C4 C5 178.3(6) . . . . ?
 C7 C8 C9 O2 154.5(5) . . . . ?
 C8 O1 C4 C3 10.7(7) . . . . ?
 C8 O1 C4 C5 -168.7(6) . . . . ?
 C8 N1 C10 O2 9.7(7) . . . . ?
 C8 N1 C10 O3 -169.3(7) . . . . ?
 C9 O2 C10 O3 -170.8(7) . . . . ?
 C9 O2 C10 N1 10.2(7) . . . . ?
 C10 O2 C9 C8 -24.9(7) . . . . ?
 C10 N1 C8 O1 90.2(6) . . . . ?
 C10 N1 C8 C7 -150.9(5) . . . . ?
 C10 N1 C8 C9 -23.8(6) . . . . ?
 C11 S1 N1 C8 109.3(6) . . . . ?
 C11 S1 N1 C10 -59.4(5) . . . . ?
 C11 C12 C13 C14 -0.6(11) . . . . ?
 C12 C11 C16 C15 0.5(10) . . . . ?
 C12 C13 C14 C15 0.9(11) . . . . ?
 C12 C13 C14 C17 179.3(8) . . . . ?
 C13 C14 C15 C16 -0.4(11) . . . . ?
 C14 C15 C16 C11 -0.3(11) . . . . ?
 C16 C11 C12 C13 -0.1(11) . . . . ?
 C17 C14 C15 C16 -178.8(7) . . . . ?

_shelx_res_file
;
TITL sa4224 in P2(1)
CELL 0.71073 11.9742 5.7044 15.4509 90 95.487 90
ZERR 2 0.0024 0.0011 0.0031 0 0.03 0
LATT -1
SYMM -X,0.5+Y,-Z
SFAC C H Br Cl N O S
UNIT 36 30 4 4 2 10 2

L.S. 4
PLAN  20
BOND
fmap 2
MORE -1
BOND $H
ACTA 52
CONF
OMIT 1 0 0
OMIT 0 0 2
REM <olex2.extras>
REM <HklSrc "%.\\sa4224.hkl">
REM </olex2.extras>

WGHT    0.068400    1.816000
FVAR       7.13045
BR1   3    0.159061   -0.146158    0.255725    11.00000    0.02409    0.04753 =
         0.03161   -0.00145    0.00516   -0.01157
BR2   3   -0.153277   -0.075680   -0.082673    11.00000    0.04553    0.04887 =
         0.02535    0.00774    0.00309    0.00318
S1    7   -0.236216   -0.081174    0.364529    11.00000    0.02057    0.01965 =
         0.02661   -0.00191    0.00179    0.00062
O1    6   -0.091144   -0.520499    0.269940    11.00000    0.02958    0.01854 =
         0.02418   -0.00145    0.00420   -0.00411
O2    6   -0.015711   -0.514932    0.461975    11.00000    0.02533    0.03053 =
         0.02708    0.00856    0.00368    0.00446
O3    6   -0.172690   -0.394354    0.518560    11.00000    0.03484    0.03374 =
         0.02541   -0.00028    0.00778   -0.00198
O4    6   -0.227964    0.002108    0.277808    11.00000    0.02232    0.02621 =
         0.03110    0.00664    0.00158   -0.00024
O5    6   -0.234164    0.080695    0.435672    11.00000    0.03082    0.02665 =
         0.04008   -0.01082    0.00356    0.00091
N1    5   -0.123558   -0.259909    0.384189    11.00000    0.02122    0.02386 =
         0.02034   -0.00412   -0.00077   -0.00001
C1    1   -0.134487   -0.223411    0.028016    11.00000    0.02984    0.03501 =
         0.02121    0.00475    0.00416    0.00375
C2    1   -0.071713   -0.107885    0.095430    11.00000    0.02838    0.02679 =
         0.02572   -0.00019    0.00765   -0.00064
AFIX  43
H2    2   -0.037465    0.035498    0.086894    11.00000   -1.20000
AFIX   0
C3    1   -0.062650   -0.217638    0.176470    11.00000    0.01921    0.02470 =
         0.02709   -0.00015    0.00407   -0.00052
C4    1   -0.110693   -0.433209    0.186305    11.00000    0.02390    0.02613 =
         0.01966   -0.00155    0.00464    0.00317
C5    1   -0.173137   -0.550676    0.119950    11.00000    0.02576    0.02513 =
         0.03067   -0.00135    0.00182   -0.00344
AFIX  43
H5    2   -0.206530   -0.694624    0.129090    11.00000   -1.20000
AFIX   0
C6    1   -0.183602   -0.441596    0.038000    11.00000    0.03548    0.03508 =
         0.02666   -0.00706   -0.00002   -0.00063
AFIX  43
H6    2   -0.223102   -0.514789   -0.009246    11.00000   -1.20000
AFIX   0
C7    1   -0.005165   -0.141781    0.261340    11.00000    0.02053    0.02547 =
         0.02425    0.00345    0.00248   -0.00528
AFIX  13
H7    2   -0.030662    0.014197    0.277336    11.00000   -1.20000
AFIX   0
C8    1   -0.042996   -0.333520    0.325401    11.00000    0.02283    0.02218 =
         0.02250   -0.00396    0.00584   -0.00380
C9    1    0.046476   -0.436551    0.390669    11.00000    0.02345    0.03111 =
         0.02474    0.00293    0.00764    0.00127
AFIX  23
H9A   2    0.084201   -0.566947    0.365596    11.00000   -1.20000
H9B   2    0.101744   -0.319074    0.410332    11.00000   -1.20000
AFIX   0
C10   1   -0.110811   -0.389126    0.461619    11.00000    0.02251    0.02440 =
         0.02414   -0.00119    0.00096   -0.00260
C11   1   -0.354060   -0.264394    0.365307    11.00000    0.01990    0.02402 =
         0.02549    0.00217    0.00246    0.00257
C12   1   -0.359697   -0.471476    0.317802    11.00000    0.02151    0.02615 =
         0.04240   -0.00111    0.00604   -0.00059
AFIX  43
H12   2   -0.298726   -0.523143    0.289967    11.00000   -1.20000
AFIX   0
C13   1   -0.458686   -0.599179    0.312979    11.00000    0.02722    0.02896 =
         0.04478   -0.00225    0.00252   -0.00733
AFIX  43
H13   2   -0.463733   -0.737310    0.280871    11.00000   -1.20000
AFIX   0
C14   1   -0.550143   -0.527121    0.354528    11.00000    0.02061    0.03544 =
         0.04045    0.01679   -0.00147   -0.00312
C15   1   -0.542220   -0.318952    0.401230    11.00000    0.02572    0.04005 =
         0.03570    0.00985    0.00896    0.00459
AFIX  43
H15   2   -0.603385   -0.268370    0.429067    11.00000   -1.20000
AFIX   0
C16   1   -0.445429   -0.184844    0.407354    11.00000    0.02873    0.03278 =
         0.02804    0.00266    0.01009    0.00331
AFIX  43
H16   2   -0.441190   -0.045318    0.438631    11.00000   -1.20000
AFIX   0
C17   1   -0.655916   -0.667462    0.347159    11.00000    0.02597    0.04671 =
         0.07538    0.01333    0.00457   -0.01337
AFIX 137
H17A  2   -0.690368   -0.660120    0.288510    11.00000   -1.50000
H17B  2   -0.706428   -0.604857    0.385934    11.00000   -1.50000
H17C  2   -0.638944   -0.827622    0.362295    11.00000   -1.50000
AFIX   0

CL1   4    0.579842    0.047831    0.046634    11.00000    0.30854    0.26853 =
         0.31153    0.13132    0.06584   -0.02614
CL2   4    0.424887   -0.120911    0.152580    11.00000    0.14347    0.26867 =
         0.11577    0.01004    0.00555    0.02639
C18   1    0.551384   -0.130080    0.116446    11.00000    0.07950    0.15304 =
         0.08679   -0.00648    0.01166   -0.03460
AFIX  23
H18A  2    0.606473   -0.111222    0.166210    11.00000   -1.20000
H18B  2    0.561561   -0.285970    0.093385    11.00000   -1.20000
AFIX   0
HKLF 4

REM  sa4224 in P2(1)
REM R1 =  0.0465 for    4555 Fo > 4sig(Fo)  and  0.0480 for all    4694 data
REM    263 parameters refined using      1 restraints

END

WGHT      0.0684      1.8151

REM Highest difference peak  1.239,  deepest hole -1.053,  1-sigma level  0.119
Q1    1   0.5118 -0.2480 -0.0018  11.00000  0.05    0.88
Q2    1   0.5968 -0.3545  0.0456  11.00000  0.05    0.47
Q3    1  -0.2849  0.2226  0.2810  11.00000  0.05    0.46
Q4    1   0.5036 -0.0149  0.0011  11.00000  0.05    0.45
Q5    1  -0.2648 -0.0798  0.4960  11.00000  0.05    0.42
Q6    1   0.5964 -0.2174  0.0538  11.00000  0.05    0.42
Q7    1   0.2463 -0.1565  0.3208  11.00000  0.05    0.39
Q8    1   0.0983 -0.3359  0.4322  11.00000  0.05    0.37
Q9    1   0.4026 -0.0288  0.0441  11.00000  0.05    0.37
Q10   1  -0.3304 -0.2320 -0.0611  11.00000  0.05    0.36
Q11   1   0.2627 -0.1456  0.2874  11.00000  0.05    0.33
Q12   1  -0.2796 -0.3563  0.4626  11.00000  0.05    0.32
Q13   1   0.1392 -0.1330  0.4584  11.00000  0.05    0.32
Q14   1  -0.6360 -0.3838  0.2964  11.00000  0.05    0.32
Q15   1   0.4458  0.0477  0.0075  11.00000  0.05    0.31
Q16   1  -0.2411 -0.0898 -0.1139  11.00000  0.05    0.31
Q17   1   0.4738  0.0109  0.0945  11.00000  0.05    0.31
Q18   1   0.4375  0.1795  0.0758  11.00000  0.05    0.30
Q19   1   0.4833 -0.1279  0.2233  11.00000  0.05    0.30
Q20   1  -0.0635 -0.6401  0.2785  11.00000  0.05    0.30
;
_shelx_res_checksum               66269
_shelx_hkl_file
;
   0   0   1  -63.39   73.08   1 0.74357-0.73917 0.66693-0.66693-0.04777 0.09387
   0   0  -1  -51.57   71.87   1 0.59640-0.60088-0.79856 0.79856-0.08126 0.03521
   0   0   1  -68.55   73.58   1 0.60666-0.60218-0.79415 0.79415-0.03577 0.08183
   0   0  -1   -4.86   70.70   1 0.40849-0.41297-0.91058 0.91058-0.06297 0.01689
   0   0   1  -21.96   71.73   1 0.36321-0.35873-0.93162 0.93162-0.01205 0.05813
   0   0   2 -184.08  116.78   1 0.73823-0.72943 0.67411-0.67411-0.02400 0.11620
   0   0  -2 -372.10  127.63   1 0.59077-0.59973-0.80010 0.80010-0.10396 0.01185
   0   0   3224098.2 1878.49   1 0.73241-0.71920 0.68086-0.68086-0.00018 0.13848
   0   0  -3221472.6 1888.85   1 0.58481-0.59826-0.80121 0.80121-0.12663-0.01153
   0   0   428129.21 1279.75   1 0.72610-0.70848 0.68717-0.68717 0.02367 0.16071
   0   0  -428653.59 1275.37   1 0.76281-0.78041 0.62498-0.62498-0.16587-0.01859
   0   0  -428005.65 1272.05   1 0.57853-0.59645-0.80188 0.80188-0.14926-0.03495
   0   0  -428830.24 1309.00   1 0.47272-0.49064-0.87017 0.87017-0.13898-0.04532
   0   0   426464.93 1187.40   1 0.29195-0.27397-0.95425 0.95425 0.06458 0.11975
   0   0   5181966.4 1680.08   1 0.71930-0.69728 0.69306-0.69306 0.04758 0.18290
   0   0  -5185169.7 1758.73   1 0.57190-0.59431-0.80211 0.80211-0.17186-0.05840
   0   0   5174726.3 1643.28   1 0.62296-0.60057-0.78026 0.78026 0.05566 0.17464
   0   0  -5179997.0 1657.41   1 0.49313-0.51553-0.85430 0.85430-0.16422-0.06616
   0   0   6398515.5 3373.27   1 0.71200-0.68558 0.69851-0.69851 0.07153 0.20504
   0   0  -6390403.5 3287.51   1 0.76719-0.79359 0.60507-0.60507-0.21282-0.06387
   0   0  -6407450.0 3516.66   1 0.56494-0.59183-0.80189 0.80189-0.19443-0.08189
   0   0  -6398409.9 3316.56   1 0.51303-0.53990-0.83720 0.83720-0.18941-0.08704
   0   0  -723371.95 1085.05   1 0.76863-0.79944 0.59446-0.59446-0.23623-0.08658
   0   0  -724120.57 1154.55   1 0.55764-0.58900-0.80122 0.80122-0.21697-0.10541
   0   0  -724675.44 1170.42   1 0.53226-0.56355-0.81897 0.81897-0.21441-0.10808
   0   0  -877924.27 2120.75   1 0.55000-0.58584-0.80009 0.80009-0.23947-0.12896
   0   0  -877909.19 2055.14   1 0.55108-0.58684-0.79934 0.79934-0.23949-0.12908
   0   0   968487.83 1876.61   1 0.68752-0.64734 0.71197-0.71197 0.14282 0.27209
   0   0  -971384.97 2000.33   1 0.54167-0.58178-0.79888 0.79888-0.26147-0.15265
   0   0  -959057.59 2582.47   1-0.15998 0.12051 0.96777-0.96777-0.19445-0.22109
   0   0  -972428.53 1957.14   1 0.56934-0.60958-0.77837 0.77837-0.26452-0.15012
   0   0  1042082.96 2116.34   1 0.67819-0.63355 0.71565-0.71565 0.16699 0.29402
   0   0 -1039810.75 2070.27   1 0.53336-0.57793-0.79682 0.79682-0.28389-0.17625
   0   0 -1042054.69 2093.26   1 0.58703-0.63174-0.75602 0.75602-0.28949-0.17123
   0   0  11223085.6 5567.47   1 0.66833-0.61922 0.71885-0.71885 0.19121 0.31590
   0   0 -11248017.719890.21   1 0.52469-0.57372-0.79428 0.79428-0.30627-0.19988
   0   0  1293041.85 3306.31   1 0.65793-0.60435 0.72158-0.72158 0.21549 0.33773
   0   0 -1297623.31 3519.23   1 0.51566-0.56914-0.79126 0.79126-0.32862-0.22355
   0   0 -1290134.79 3204.43   1 0.62058-0.67422-0.70695 0.70695-0.33925-0.21361
   0   0  13 2664.83  486.81   1 0.64697-0.58893 0.72381-0.72381 0.23982 0.35950
   0   0 -13 3139.83  563.30   1 0.50625-0.56420-0.78774 0.78774-0.35093-0.24725
   0   0 -13 2531.24  414.50   1 0.63637-0.69449-0.68007 0.68007-0.36404-0.23490
   0   0  1413009.73 1410.98   1 0.63543-0.57293 0.72554-0.72554 0.26420 0.38122
   0   0 -1413807.82 1498.69   1 0.49647-0.55887-0.78372 0.78372-0.37321-0.27099
   0   0 -1412003.21 1250.33   1 0.65155-0.71416-0.65134 0.65134-0.38888-0.25637
   0   0  15 5096.86  765.29   1 0.62330-0.55634 0.72675-0.72675 0.28864 0.40288
   0   0 -15 5542.92  962.25   1 0.48629-0.55315-0.77918 0.77918-0.39545-0.29476
   0   0 -15 4576.63  715.28   1 0.66590-0.73298-0.62093 0.62093-0.41354-0.27780
   0   0  16 1434.74  531.49   1 0.61057-0.53913 0.72741-0.72741 0.31315 0.42448
   0   0 -16 1349.65  645.43   1 0.47572-0.54703-0.77411 0.77411-0.41765-0.31858
   0   0  1735573.41 2573.29   1 0.59720-0.52130 0.72753-0.72753 0.33771 0.44602
   0   0 -1739153.17 2792.52   1 0.46473-0.54050-0.76849 0.76849-0.43980-0.34244
   0   0 -1733370.16 2332.88   1 0.69209-0.76811-0.55408 0.55408-0.46260-0.32092
   0   0  1855163.03 3205.23   1 0.58331-0.50287 0.72703-0.72703 0.36215 0.46747
   0   0 -1858096.0211063.26   1 0.45331-0.53354-0.76231 0.76231-0.46192-0.36633
   0   0  19  492.96  382.22   1 0.56860-0.48369 0.72597-0.72597 0.38684 0.48888
   0   0 -19 1094.71  673.30   1 0.44146-0.52614-0.75554 0.75554-0.48400-0.39027
   0   1   0 1242.34  147.17   1 0.53082-0.53082 0.06243 0.06243-0.84517 0.84517
   0  -1   0  792.72  104.76   1 0.42694-0.42694-0.06243-0.06243-0.90212 0.90212
   0  -1   0  915.74  107.39   1 0.33070-0.33070-0.06233-0.06233 0.94167-0.94167
   0   1   0 1522.39  200.62   1 0.71099-0.71099 0.06234 0.06234-0.70042 0.70042
   0  -1   0 1044.21  168.79   1 0.73332-0.73332-0.06235-0.06235-0.67701 0.67701
   0  -1  -1540366.4 4236.53   1 0.62064-0.62500 0.18897-0.31383-0.76097 0.71475
   0   1   1527413.4 4122.66   1 0.45734-0.45277-0.26034 0.38501 0.85032-0.80421
   0   1   1509709.6 4007.51   1 0.62836-0.62398 0.31257-0.18792-0.71235 0.75850
   0   1  -1522449.2 4140.63   1 0.74151-0.74591-0.14536 0.27006-0.65500 0.60883
   0  -1   1525354.4 4160.71   1 0.74244-0.73796-0.27077 0.14607-0.61274 0.65883
   0   1  -289748.17 2203.57   1 0.30079-0.30973 0.64033-0.51555 0.70674-0.79891
   0  -1  -2106872.0 2655.55   1 0.69896-0.70771 0.32513-0.44994-0.63697 0.54470
   0   1  -287426.92 2176.89   1 0.14703-0.15586-0.51597 0.64039-0.84388 0.75206
   0   1   286463.64 2145.93   1 0.56105-0.55190-0.45571 0.58036 0.69104-0.59881
   0   1   282156.89 2038.13   1 0.49059-0.48181 0.55791-0.43329-0.66936 0.76165
   0   1  -285117.62 2142.62   1 0.74122-0.75017-0.29555 0.42026-0.60268 0.51049
   0   1   3320897.6 2620.46   1 0.60405-0.59038-0.55798 0.68261 0.56900-0.43067
   0  -1   3292783.5 2461.28   1 0.68723-0.67381-0.56789 0.44314-0.45299 0.59126
   0  -1  -4155452.7 1450.80   1 0.74588-0.76342 0.43755-0.56234-0.50220 0.31771
   0   1  -4156460.3 1421.08   1 0.34509-0.36290-0.69020 0.81484-0.63602 0.45202
   0   1   4145990.7 1342.54   1 0.62203-0.60380-0.61257 0.73720 0.48767-0.30323
   0   1   4155314.8 1330.77   1 0.16114-0.14341 0.86922-0.74464-0.46742 0.65187
   0  -1  -4159183.0 1355.22   1 0.40250-0.42007 0.66880-0.79341-0.62505 0.44048
   0  -1   5 8480.39  778.18   1 0.50055-0.47821 0.71465-0.83945 0.48857-0.25812
   0   1  -512740.41 1133.30   1 0.67607-0.69839 0.71640-0.59157 0.17232-0.40283
   0   1   513056.09 1211.89   1 0.76896-0.74695 0.59123-0.46647-0.24317 0.47376
   0  -1  -5 7686.88  727.82   1 0.75282-0.77476 0.46010-0.58489-0.47069 0.24009
   0   1  -513661.16 1252.88   1 0.38563-0.40790-0.71977 0.84441-0.57724 0.34724
   0  -1   5 8631.23  813.16   1 0.51567-0.49338-0.79126 0.66667-0.32859 0.55867
   0  -1  -5 8809.23  833.06   1 0.63747-0.65986-0.74617 0.62150 0.19195-0.42226
   0   1   512394.08 1124.09   1 0.63000-0.60754-0.64246 0.76713 0.43625-0.20588
   0   1   514968.09 1450.11   1 0.02117 0.00098 0.93398-0.80940-0.35668 0.58725
   0  -1  -5 8888.57 1005.79   1 0.32949-0.35145 0.74303-0.86755-0.58251 0.35189
   0   1  -514120.65 1311.92   1 0.70660-0.72896-0.50733 0.63208-0.49327 0.26282
   0  -1   5 8127.30  792.15   1 0.59977-0.57742-0.73852 0.61381-0.30798 0.53834
   0  -1   637691.64 1653.31   1 0.53359-0.50678 0.72134-0.84614 0.44151-0.16497
   0   1  -637655.06 1653.43   1 0.70913-0.73555 0.70045-0.57567 0.08055-0.35714
   0   1   636342.03 1650.54   1 0.76470-0.73829 0.61763-0.49287-0.18371 0.46041
   0   1  -636912.79 1651.15   1 0.40942-0.43615-0.73582 0.86046-0.53937 0.26337
   0  -1   635235.89 1567.52   1 0.54751-0.52063-0.79964 0.67492-0.24656 0.52289
   0   1   637088.51 1634.46   1-0.09330 0.11960 0.96210-0.83746-0.25620 0.53324
   0  -1  -632009.05 1428.07   1 0.27715-0.30351 0.78863-0.91314-0.54885 0.27210
   0   1  -637777.38 1710.81   1 0.69875-0.72559-0.53374 0.65849-0.47628 0.19975
   0  -1   635237.45 1579.11   1 0.55503-0.52820-0.79497 0.67027-0.24484 0.52128
   0  -1   7107959.8 2735.23   1 0.55193-0.52065 0.72411-0.84891 0.41354-0.09091
   0   1  -7107600.5 2707.15   1 0.73047-0.76129 0.68290-0.55812 0.00734-0.33003
   0   1   7110320.2 2848.53   1 0.75870-0.72787 0.63788-0.51310-0.13219 0.45488
   0   1  -7111264.9 2875.78   1 0.42336-0.45453-0.74472 0.86936-0.51589 0.19388
   0  -1  -793817.85 2384.80   1 0.24151-0.27226 0.81629-0.94081-0.52471 0.20183
   0   1  -7116813.9 3025.10   1 0.69396-0.72526-0.54853 0.67328-0.46638 0.14376
   0  -1   7106632.3 2737.06   1 0.51114-0.47978-0.83890 0.71426-0.18699 0.50954
   0  -1   8217348.9 2002.67   1 0.56159-0.52584 0.72527-0.85006 0.39823-0.02950
   0   1   8212036.2 2164.74   1 0.75117-0.71594 0.65447-0.52969-0.08601 0.45479
   0   1  -8216543.6 2136.95   1 0.43109-0.46672-0.74948 0.87413-0.50242 0.13441
   0   1  -8223155.1 2165.37   1 0.69181-0.72759-0.55487 0.67962-0.46206 0.09334
   0  -1   9340833.125191.57   1 0.56569-0.52547 0.72569-0.85049 0.39160 0.02321
   0   1   9360336.626649.90   1 0.74272-0.70308 0.66816-0.54338-0.04380 0.45868
   0   1  -9371693.327486.23   1 0.43466-0.47474-0.75164 0.87628-0.49608 0.08207
   0  -1  -9339077.5 8304.37   1 0.60416-0.64449-0.79544 0.67072-0.04740-0.36709
   0  -1  -9290060.3 7023.90   1 0.20643-0.24596 0.84103-0.96555-0.50004 0.08491
   0   1  -9380110.528098.61   1 0.69183-0.73208-0.55481 0.67956-0.46210 0.04729
   0  -1  -9368047.327193.95   1 0.33114-0.37157-0.94329 0.81863 0.02313-0.43790
   0  -1  10 4917.41  571.04   1 0.56598-0.52129 0.72572-0.85052 0.39114 0.06976
   0   1  10 8983.52  964.67   1 0.73351-0.68948 0.67965-0.55487-0.00456 0.46553
   0   1 -10 9373.31  922.84   1 0.43529-0.47982-0.75202 0.87666-0.49495 0.03494
   0  -1 -10 6290.53  739.97   1 0.59410-0.63891-0.79925 0.67453-0.09069-0.36985
   0  -1 -10 4302.14  616.69   1 0.20141-0.24573 0.84409-0.96867-0.49692 0.03579
   0   1 -10 7890.92  829.50   1 0.69357-0.73829-0.54971 0.67446-0.46558 0.00469
   0  -1 -10 5221.86  549.92   1 0.38621-0.43101-0.92164 0.79699-0.03766-0.42311
   0  -1  11 7697.64  705.86   1 0.56348-0.51433 0.72547-0.85027 0.39518 0.11181
   0   1  1110703.57  955.95   1 0.72366-0.67522 0.68938-0.56461 0.03243 0.47464
   0   1 -1110794.24 1025.47   1 0.43373-0.48272-0.75108 0.87573-0.49773-0.00827
   0  -1 -11 5755.10  615.28   1 0.58375-0.63304-0.80136 0.67664-0.13055-0.37605
   0   1 -1110485.28  963.92   1 0.69661-0.74580-0.54048 0.66523-0.47181-0.03517
   0  -1 -11 6973.57  652.93   1 0.43442-0.48370-0.89588 0.77124-0.09307-0.41378
   0  -1  1224886.46 2095.90   1 0.55886-0.50523 0.72496-0.84976 0.40261 0.15047
   0   1  1225021.08 2150.96   1 0.71321-0.66036 0.69767-0.57289 0.06767 0.48549
   0   1 -1226642.82 2448.65   1 0.43048-0.48392-0.74911 0.87376-0.50349-0.04851
   0  -1 -1225143.64 2168.24   1 0.57313-0.62690-0.80210 0.67738-0.16776-0.38489
   0   1 -1226619.30 2459.59   1 0.70062-0.75428-0.52773 0.65248-0.48022-0.07284
   0  -1 -1225257.44 2104.90   1 0.47683-0.53059-0.86711 0.74246-0.14402-0.40891
   0  -1  1319834.21 2218.96   1 0.55250-0.49440 0.72418-0.84898 0.41266 0.18651
   0   1  1317255.36 2005.67   1 0.70218-0.64493 0.70471-0.57993 0.10154 0.49772
   0   1 -1317086.31 1977.06   1 0.42586-0.48375-0.74628 0.87092-0.51157-0.08643
   0  -1 -1318783.86 2134.38   1 0.56225-0.62050-0.80169 0.67697-0.20287-0.39583
   0   1 -1316103.89 1814.33   1 0.70531-0.76345-0.51189 0.63664-0.49040-0.10876
   0  -1 -1321384.25 2348.15   1 0.51459-0.57283-0.83579 0.71115-0.19142-0.40759
   0  -1  1418940.99 1933.63   1 0.54468-0.48212 0.72310-0.84790 0.42477 0.22049
   0   1  1421430.89 2650.27   1 0.69098-0.62847 0.71043-0.58561 0.13350 0.51192
   0   1 -1420520.30 2521.33   1 0.42009-0.48244-0.74267 0.86731-0.52149-0.12251
   0  -1 -1420043.65 2069.40   1 0.55109-0.61382-0.80028 0.67555-0.23631-0.40846
   0   1 -1420339.05 2454.52   1 0.71043-0.77304-0.49321 0.61796-0.50201-0.14324
   0  -1 -1417517.10 1756.83   1 0.54823-0.61081-0.80244 0.67773-0.23565-0.40936
   0  -1  1556712.50 3690.09   1 0.53559-0.46856 0.72168-0.84647 0.43853 0.25283
   0   1  1541558.11 2795.45   1 0.67882-0.61185 0.71542-0.59060 0.16540 0.52613
   0   1 -1548053.90 3222.54   1 0.41333-0.48014-0.73836 0.86300-0.53289-0.15711
   0  -1 -1563593.53 4218.32   1 0.53939-0.60624-0.79836 0.67376-0.26772-0.42249
   0   1 -1545684.58 2997.75   1 0.71565-0.78277-0.47202 0.59673-0.51480-0.17656
   0  -1 -1555861.59 3601.37   1 0.57888-0.64594-0.76659 0.64189-0.27788-0.41319
   0  -1  1625560.16 1836.10   1 0.52535-0.45385 0.71987-0.84467 0.45363 0.28381
   0   1  1622373.87 1750.51   1 0.66608-0.59465 0.71950-0.59468 0.19658 0.54105
   0   1 -1625744.85 1901.89   1 0.40570-0.47696-0.73338 0.85802-0.54548-0.19052
   0  -1 -1625578.98 1937.52   1 0.52768-0.59900-0.79520 0.67061-0.29865-0.43758
   0   1 -1624119.29 1742.78   1 0.72101-0.79260-0.44811 0.57282-0.52852-0.20893
   0  -1 -1622630.22 1627.28   1 0.60670-0.67823-0.72845 0.60374-0.31823-0.41892
   0  -1  17 4079.81  871.29   1 0.51404-0.43806 0.71763-0.84243 0.46985 0.31369
   0   1  17 5909.30 1162.12   1 0.65274-0.57684 0.72271-0.59789 0.22717 0.55657
   0  -1 -17 3130.34  753.11   1 0.51565-0.59142-0.79126 0.66666-0.32863-0.45361
   0   1 -17 3129.92  654.41   1 0.72620-0.80226-0.42164 0.54635-0.54299-0.24055
   0  -1  1815565.60 1155.09   1 0.50170-0.42126 0.71492-0.83972 0.48700 0.34263
   0   1  1815327.81 1183.51   1 0.63877-0.55840 0.72510-0.60028 0.25727 0.57257
   0  -1 -1814642.76 1155.53   1 0.50328-0.58350-0.78655 0.66196-0.35781-0.47044
   0  -1  19 3816.78  866.48   1 0.48838-0.40347 0.71169-0.83649 0.50494 0.37078
   0   1  19 2424.06  701.12   1 0.62415-0.53932 0.72668-0.60186 0.28697 0.58896
   0   1 -19 2702.33  748.86   1 0.37822-0.46284-0.71456 0.83920-0.58851-0.28550
   0  -1 -19 4553.68 1130.21   1 0.49052-0.57521-0.78111 0.65652-0.38631-0.48796
   0  -2   0851285.9 6668.25   1 0.37271-0.37271-0.12467-0.12467 0.91953-0.91953
   0   2   0871914.8 6808.10   1 0.19475-0.19475 0.12467 0.12467 0.97289-0.97289
   0   2   0891431.2 7059.19   1 0.69528-0.69528 0.12468 0.12468-0.70783 0.70783
   0   2  -1176009.1 1463.97   1-0.19253 0.18806 0.29819-0.04881 0.93488-0.98094
   0   2   1177237.6 1589.58   1 0.65768-0.65331 0.24899 0.00061-0.71095 0.75708
   0  -2  -1187114.2 1617.30   1 0.49931-0.50367 0.02241-0.27214-0.86612 0.81991
   0   2  -1175223.3 1508.53   1 0.45751-0.46191-0.02718 0.27691-0.88878 0.84258
   0  -2   1174127.1 1508.32   1-0.04757 0.05202-0.30531 0.05602-0.95106 0.99707
   0   2   1172576.5 1491.58   1 0.32327-0.31877-0.05153 0.30089 0.94490-0.89880
   0   2  -1174401.1 1631.16   1 0.72119-0.72559 0.01346 0.23591-0.69259 0.64642
   0   2  -2265222.6 2140.77   1 0.01949-0.02845 0.46926-0.21983 0.88284-0.97512
   0  -2  -2249994.8 2138.88   1 0.58351-0.59222 0.13401-0.38373-0.80097 0.70853
   0   2  -2278937.2 2289.00   1-0.11895 0.11004-0.21986 0.46916-0.96825 0.87622
   0  -2   2260892.2 2167.33   1 0.09511-0.08628-0.46328 0.21444-0.88109 0.97291
   0  -2  -2260518.1 2213.41   1 0.54782-0.55697-0.42793 0.17863 0.71886-0.81108
   0   2   2273151.2 2280.12   1 0.42125-0.41210-0.20069 0.45004 0.88446-0.79223
   0  -2   2268016.3 2355.64   1 0.73841-0.72946-0.33228 0.08286-0.58679 0.67897
   0  -2   329851.46 1296.35   1-0.14019 0.15360 0.34363-0.59300 0.92858-0.79041
   0   2  -326971.68 1169.27   1 0.22490-0.23829 0.60067-0.35119 0.76720-0.90547
   0   2  -324628.69 1137.33   1-0.00490-0.00834-0.35486 0.60370-0.93490 0.79716
   0  -2   324129.20 1105.79   1 0.21859-0.20526-0.58410 0.33494-0.78169 0.91960
   0  -2  -326918.02 1222.27   1 0.59387-0.60755-0.53127 0.28201 0.60420-0.74252
   0   2   325875.33 1151.86   1 0.48859-0.47487-0.31501 0.56431 0.81365-0.67531
   0   2   324537.67 1099.84   1 0.51991-0.50673 0.51460-0.26538-0.68181 0.82023
   0  -2  -322287.04  997.99   1 0.67325-0.68642 0.19682-0.44620-0.71272 0.57420
   0   2  -325029.48 1191.76   1 0.74232-0.75551-0.15872 0.40812-0.65097 0.51247
   0  -2   324795.87 1136.72   1 0.72567-0.71224-0.42452 0.17510-0.54146 0.67973
   0  -2   4 7886.13  758.41   1 0.01079 0.00712 0.46295-0.71238 0.88631-0.70175
   0   2  -4 3110.98  302.64   1 0.39068-0.40854 0.67988-0.43032 0.62058-0.80492
   0   2   4 3218.99  434.80   1 0.75653-0.73899 0.47367-0.22409-0.45087 0.63535
   0  -2  -4 6764.83  644.56   1 0.67002-0.68752 0.27050-0.52011-0.69129 0.50674
   0   2  -4 5559.90  641.77   1 0.08720-0.10487-0.45503 0.70387-0.88619 0.70253
   0  -2   4 7182.64  662.90   1 0.31646-0.29865-0.66783 0.41854-0.67368 0.85768
   0  -2  -4 7355.32  728.20   1 0.62031-0.63854-0.60672 0.35746 0.49709-0.68152
   0   2   4 3274.35  366.75   1 0.53296-0.51465-0.39803 0.64733 0.74667-0.56221
   0   2   4 3808.55  398.34   1 0.42986-0.41229 0.63708-0.38785-0.63979 0.82436
   0  -2  -4 6395.97  596.93   1 0.63805-0.65560 0.28973-0.53903-0.71339 0.52879
   0   2  -4 4180.93  468.11   1 0.74417-0.76176-0.22065 0.47005-0.63048 0.44582
   0  -2   5236075.7 1979.22   1 0.13106-0.10874 0.54467-0.79415 0.82834-0.59790
   0   2  -6239478.4 2023.26   1 0.59203-0.61882 0.72742-0.47778 0.34690-0.62352
   0   2  -6256771.4 2299.45   1 0.20862-0.23529-0.57488 0.82404-0.79118 0.51535
   0   2   6237569.3 2052.29   1 0.22647-0.20011 0.82720-0.57817-0.51424 0.79099
   0   2  -6257782.1 2442.92   1 0.74063-0.76748-0.30475 0.55417-0.59881 0.32226
   0  -2   739010.96 1714.26   1 0.28425-0.25299 0.63215-0.88171 0.72081-0.39821
   0   2  -731891.51 1406.59   1 0.64799-0.67925 0.72363-0.47399 0.23759-0.56031
   0   2   733829.66 1632.73   1 0.76967-0.73887 0.58148-0.33196-0.26357 0.58640
   0   2  -731024.36 1459.79   1 0.24606-0.27718-0.60891 0.85807-0.75410 0.43229
   0  -2  -738316.71 1763.29   1 0.63965-0.67100-0.72935 0.48000 0.24267-0.56510
   0   2   730905.55 1392.79   1 0.12440-0.09337 0.88955-0.64040-0.43955 0.76234
   0  -2  -730886.50 1375.89   1 0.53611-0.56681 0.48939-0.73869-0.68780 0.36475
   0   2  -733888.50 1588.01   1 0.73849-0.76981-0.33145 0.58086-0.58716 0.26452
   0  -2   8125774.8 3115.84   1 0.32935-0.29362 0.65383-0.90339 0.68119-0.31250
   0   2   8133563.8 3446.44   1 0.76713-0.73192 0.60539-0.35588-0.21211 0.58105
   0   2  -8136663.4 3532.95   1 0.27304-0.30860-0.63246 0.88161-0.72487 0.35709
   0  -2  -8129344.1 3340.67   1 0.63641-0.67224-0.75101 0.50166 0.17594-0.54443
   0   2   8134514.4 3403.21   1 0.02722 0.00823 0.93188-0.68272-0.36172 0.73062
   0  -2  -8109244.6 2715.59   1 0.50908-0.54422 0.53103-0.78025-0.67737 0.30823
   0   2  -8143394.9 3650.68   1 0.73661-0.77241-0.34999 0.59940-0.57870 0.20997
   0  -2   9 5116.71  552.90   1 0.36075-0.32055 0.66769-0.91725 0.65118-0.23641
   0   2   9 3554.22  498.47   1 0.76264-0.72303 0.62556-0.37605-0.16442 0.57948
   0   2  -9 5000.17  759.09   1 0.29223-0.33224-0.64868 0.89783-0.70271 0.28896
   0  -2  -9 4308.16  545.23   1 0.63089-0.67120-0.76716 0.51782 0.11586-0.53041
   0   2   9 4092.20  531.50   1-0.06264 0.10210 0.95687-0.70758-0.28365 0.69920
   0   2  -9 6238.38  734.37   1 0.73526-0.77553-0.36170 0.61111-0.57320 0.15838
   0  -2  1029571.82 2258.67   1 0.38219-0.33752 0.67653-0.92609 0.62947-0.16861
   0   2  1037005.83 3082.88   1 0.75688-0.71284 0.64244-0.39288-0.11995 0.58093
   0   2 -1034233.91 2845.09   1 0.30603-0.35057-0.65940 0.90869-0.68667 0.22666
   0   2  1034034.94 2777.75   1-0.14544 0.18929 0.96721-0.71793-0.20815 0.66988
   0   2 -1037757.67 3131.67   1 0.73452-0.77926-0.36764 0.61706-0.57036 0.10945
   0  -2  11145154.5 4968.44   1 0.39628-0.34714 0.68204-0.93160 0.61463-0.10769
   0   2  11147385.8 5163.48   1 0.74965-0.70121 0.65724-0.40768-0.07781 0.58488
   0   2 -11135894.3 4711.44   1 0.31490-0.36389-0.66657 0.91586-0.67565 0.16964
   0   2 -11154263.4 5344.48   1 0.73439-0.78361-0.36864 0.61805-0.56988 0.06288
   0  -2  1297974.17 3057.75   1 0.40481-0.35120 0.68526-0.93483 0.60542-0.05239
   0   2  1285831.21 2860.96   1 0.74137-0.68852 0.67003-0.42047-0.03769 0.59086
   0   2 -1277863.28 2547.26   1 0.32027-0.37371-0.67087 0.92015-0.66884 0.11684
   0   2 -1288174.51 2875.02   1 0.73481-0.78850-0.36533 0.61475-0.57147 0.01837
   0  -2 -1295853.23 2992.12   1 0.28980-0.34371-0.95475 0.70543 0.06682-0.61986
   0  -2  13 4905.37  578.49   1 0.40902-0.35095 0.68682-0.93638 0.60080-0.00168
   0   2  13 7570.07 1092.32   1 0.73217-0.67492 0.68111-0.43156 0.00074 0.59852
   0   2 -13 6229.16  746.95   1 0.32285-0.38075-0.67292 0.92220-0.66553 0.06752
   0  -2 -13 5241.02  690.72   1 0.59680-0.65505-0.79842 0.54898-0.07956-0.51915
   0   2 -13 7056.13  916.88   1 0.73567-0.79384-0.35821 0.60763-0.57485-0.02433
   0  -2 -13 4188.03  507.42   1 0.35156-0.40996-0.93616 0.68684 0.00102-0.60014
   0  -2  1415872.76 1052.02   1 0.40980-0.34726 0.68711-0.93667 0.59994 0.04525
   0   2  1411635.54 1520.44   1 0.72214-0.66048 0.69071-0.44115 0.03780 0.60756
   0   2 -1411308.91 1422.67   1 0.32316-0.38552-0.67317 0.92245-0.66513 0.02112
   0  -2 -1415675.87 1812.64   1 0.58636-0.64909-0.80097 0.55153-0.12086-0.52391
   0   2 -1412218.77 1567.86   1 0.73687-0.79951-0.34765 0.59706-0.57979-0.06548
   0  -2 -1415715.27 1058.94   1 0.40686-0.46958-0.91144 0.66215-0.06110-0.58398
   0  -2  15  312.73  258.19   1 0.40775-0.34075 0.68636-0.93592 0.60219 0.08908
   0   2  15  786.59  460.85   1 0.71132-0.64526 0.69898-0.44943 0.07370 0.61776
   0   2 -15 1309.16  612.07   1 0.32159-0.38839-0.67192 0.92120-0.66715-0.02285
   0  -2 -15  524.31  489.75   1 0.57540-0.64261-0.80204 0.55260-0.16009-0.53073
   0   2 -15  252.98  384.69   1 0.73826-0.80538-0.33391 0.58332-0.58606-0.10530
   0  -2 -15  929.94  349.51   1 0.45751-0.52471-0.88099 0.63170-0.12053-0.57063
   0  -2  16 3124.63  610.38   1 0.40333-0.33186 0.68471-0.93427 0.60702 0.13034
   0   2  16 3518.46  789.64   1 0.69976-0.62930 0.70607-0.45651 0.10862 0.62894
   0   2 -16 4554.36  812.45   1 0.31841-0.38966-0.66938 0.91867-0.67121-0.06479
   0  -2 -16 3364.44  702.12   1 0.56394-0.63563-0.80182 0.55238-0.19758-0.53929
   0   2 -16 3832.94  699.87   1 0.73972-0.81131-0.31718 0.56660-0.59346-0.14399
   0  -2  1717115.04 1313.06   1 0.39685-0.32092 0.68226-0.93182 0.61401 0.16943
   0   2  1713832.55 1199.93   1 0.68784-0.61195 0.71183-0.46219 0.14195 0.64178
   0   2 -1715538.52 1256.30   1 0.31383-0.38954-0.66571 0.91500-0.67699-0.10501
   0  -2 -1719034.10 1610.04   1 0.55203-0.62820-0.80043 0.55098-0.23359-0.54934
   0   2 -1718011.40 1392.59   1 0.74110-0.81717-0.29758 0.54699-0.60183-0.18171
   0  -2  1837921.05 3052.58   1 0.38855-0.30814 0.67904-0.92860 0.62283 0.20670
   0   2  1835097.35 2899.07   1 0.67484-0.59448 0.71681-0.46717 0.17537 0.65447
   0   2 -1834801.77 2857.84   1 0.30801-0.38818-0.66101 0.91029-0.68424-0.14377
   0  -2 -1837579.50 3193.96   1 0.53945-0.61967-0.79837 0.54918-0.26755-0.56070
   0   2 -1834626.46 2820.79   1 0.74226-0.82280-0.27516 0.52457-0.61100-0.21864
   0  -2  19 1430.96  486.58   1 0.37858-0.29371 0.67508-0.92464 0.63319 0.24242
   0   2  19 1313.72  576.33   1 0.66111-0.57628 0.72081-0.47117 0.20820 0.66774
   0   2 -19 3608.40  903.78   1 0.30076-0.38522-0.65574 0.90490-0.69248-0.18098
   0  -2 -19 1438.07  560.29   1 0.52669-0.61137-0.79490 0.54571-0.30120-0.57307
   0   3   0  104.67  271.46   1 0.61955-0.61955 0.18729 0.18729-0.76228 0.76228
   0  -3   0  210.61  104.63   1-0.14543 0.14543-0.18697-0.18697-0.97153 0.97153
   0  -3   0  410.06  213.75   1 0.41272-0.41272-0.18701-0.18701 0.89145-0.89145
   0   3  -1134138.0 3325.03   1-0.18744 0.18297 0.30270 0.07134 0.93446-0.98052
   0   3   1141092.0 1422.74   1 0.66848-0.66411 0.26776 0.10664-0.69385 0.73998
   0   3  -1141614.8 1350.99   1 0.55514-0.55949 0.09466 0.27992-0.82635 0.78013
   0  -3  -1143832.2 1407.25   1 0.47874-0.48332-0.29755-0.07638 0.82599-0.87210
   0  -3   1141422.7 1350.11   1 0.33612-0.33155-0.06997-0.30405 0.93921-0.89310
   0   3  -1142746.3 1509.47   1 0.69902-0.70341 0.11091 0.26315-0.70644 0.66027
   0   3  -252107.29 2241.13   1-0.04518 0.03622 0.42092-0.04678 0.90596-0.99824
   0   3   256351.48 2487.93   1 0.70440-0.69566 0.33627 0.03813-0.62508 0.71735
   0   3  -253091.67 2307.84   1 0.47434-0.48315-0.00719 0.38179-0.88030 0.78790
   0  -3  -242004.03 1869.04   1 0.53195-0.54111-0.39606 0.02212 0.74843-0.84066
   0  -3   243750.51 1918.64   1 0.25403-0.24503 0.04576-0.41979 0.96611-0.87391
   0   3   255943.99 2463.41   1 0.60711-0.59834 0.35917 0.01477-0.70880 0.80110
   0   3  -255997.32 2519.11   1 0.71523-0.72401 0.04311 0.33095-0.69755 0.60521
   0   3   3193957.8 1922.04   1 0.72988-0.71672 0.39382-0.01945-0.55871 0.69708
   0   3  -3200859.6 1771.34   1 0.38118-0.39440-0.11289 0.48749-0.91757 0.77897
   0  -3  -3195798.3 1859.97   1 0.57218-0.58586-0.47978 0.10589 0.66513-0.80346
   0   3   3208748.1 1987.91   1 0.55907-0.54592 0.45079-0.07684-0.69585 0.83430
   0  -3   430261.56 1335.73   1-0.28298 0.30086 0.21410-0.58816 0.93492-0.75069
   0   3  -423183.33 1024.20   1 0.24903-0.26688 0.61385-0.23963 0.74910-0.93345
   0   3   425271.74 1246.25   1 0.74742-0.72987 0.44229-0.06792-0.49571 0.68019
   0   3  -426387.45 1208.65   1-0.09709 0.07929-0.24652 0.62046-0.96426 0.78021
   0  -3  -430894.51 1447.07   1 0.60068-0.61892-0.54890 0.17501 0.58126-0.76570
   0   3   428813.90 1342.52   1 0.50154-0.48397 0.54216-0.16832-0.67417 0.85873
   0   3  -430497.03 1501.48   1 0.73381-0.75140-0.06619 0.44029-0.67611 0.49145
   0  -3   5114791.8 2818.51   1-0.18426 0.20660 0.30552-0.67958 0.93418-0.70390
   0   3  -598975.03 2432.26   1 0.37452-0.39686 0.67343-0.29909 0.63735-0.86778
   0   3   5103386.2 2685.71   1 0.75892-0.73699 0.48324-0.10887-0.43647 0.66707
   0   3  -597745.59 2594.75   1-0.03061 0.00835-0.32494 0.69889-0.94523 0.71517
   0  -3  -5122265.6 3097.13   1 0.61975-0.64254-0.60484 0.23095 0.50007-0.73061
   0   3   5102076.6 2584.58   1 0.43580-0.41383 0.62990-0.25606-0.64288 0.87359
   0  -3   613474.16 1415.28   1-0.09327 0.12014 0.38289-0.75703 0.91907-0.64223
   0   3  -6 9297.50  823.28   1 0.47674-0.50355 0.70863-0.33424 0.52014-0.79668
   0   3   6 9279.64  961.25   1 0.76585-0.73953 0.51807-0.14369-0.38087 0.65759
   0   3  -611234.70 1288.75   1 0.02544-0.05194-0.38871 0.76196-0.92100 0.64552
   0  -3  -611700.24 1093.12   1 0.63151-0.65846-0.64911 0.27512 0.42407-0.70052
   0   3   610660.56 1426.60   1 0.36244-0.33608 0.71104-0.33750-0.60253 0.87928
   0   3  -6 9506.35  954.45   1 0.74133-0.76772-0.14273 0.51684-0.65577 0.37878
   0  -3   741848.01 2010.71   1-0.01448 0.04583 0.44427-0.81841 0.89577-0.57279
   0   3   740672.01 2100.23   1 0.76928-0.73847 0.54784-0.17357-0.32872 0.65155
   0   3  -744351.15 2471.46   1 0.07192-0.10284-0.43894 0.81220-0.89562 0.57423
   0  -3  -741762.15 2121.32   1 0.63776-0.66920-0.68489 0.31090 0.35239-0.67491
   0   3   741583.49 2420.81   1 0.28437-0.25362 0.78270-0.40915-0.55363 0.87650
   0   3  -745130.96 2287.41   1 0.74290-0.77368-0.17021 0.54431-0.64739 0.32424
   0  -3   822630.18 1718.72   1 0.05099-0.01516 0.49164-0.86578 0.86929-0.50017
   0   3   820578.05 1681.35   1 0.76996-0.73475 0.57365-0.19938-0.27942 0.64836
   0   3  -822074.12 1862.74   1 0.10950-0.14484-0.47814 0.85140-0.87142 0.50412
   0  -3  -823208.50 1858.77   1 0.63986-0.67580-0.71340 0.33941 0.28569-0.65428
   0   3   819877.94 1734.04   1 0.20305-0.16759 0.84300-0.46927-0.49810 0.86700
   0   3  -821139.61 1710.41   1 0.74369-0.77887-0.19140 0.56551-0.64053 0.27121
   0  -3   9139184.3 4725.67   1 0.10366-0.06347 0.52696-0.90118 0.84354-0.42875
   0   3  -9140523.6 5041.09   1 0.13942-0.17917-0.50840 0.88166-0.84975 0.43653
   0  -3  -9146265.5 5090.86   1 0.63905-0.67936-0.73587 0.36185 0.22382-0.63837
   0   3   9126968.6 4337.08   1 0.12070-0.08081 0.89147-0.51773-0.43670 0.85171
   0   3  -9148457.1 5173.00   1 0.74404-0.78361-0.20696 0.58107-0.63527 0.21978
   0  -3  1021287.19 1913.31   1 0.14528-0.10063 0.55362-0.92785 0.81999-0.35911
   0   3 -1030149.85 2970.49   1 0.16272-0.20718-0.53118 0.90491-0.83148 0.37176
   0  -3 -1023343.71 2213.60   1 0.63566-0.68046-0.75389 0.37987 0.16601-0.62662
   0   3  1023738.44 2378.29   1 0.03896 0.00536 0.92764-0.55390-0.37143 0.83256
   0   3 -1026668.67 2454.39   1 0.74416-0.78813-0.21747 0.59157-0.63161 0.16995
   0  -3  1121578.98 2456.77   1 0.17740-0.12829 0.57324-0.94747 0.79994-0.29298
   0   3  1125980.67 1228.16   1 0.76031-0.71190 0.63302-0.25875-0.14557 0.65286
   0   3 -1126517.75 1441.17   1 0.18079-0.22970-0.54864 0.92237-0.81627 0.31057
   0  -3 -1124488.66 1100.02   1 0.63044-0.67972-0.76811 0.39409 0.11192-0.61859
   0   3  1119932.15 2681.63   1-0.04038 0.08861 0.95206-0.57813-0.30322 0.81111
   0   3 -1125299.37 1136.54   1 0.74418-0.79255-0.22342 0.59753-0.62949 0.12167
   0  -3  12 6459.72 1149.80   1 0.20163-0.14805 0.58747-0.96170 0.78371-0.23066
   0   3  12 9564.18 1482.67   1 0.75445-0.70160 0.64793-0.27360-0.10476 0.65794
   0   3 -12 8767.71 1341.79   1 0.19441-0.24776-0.56158 0.93531-0.80425 0.25259
   0  -3 -12 7749.35 1152.49   1 0.62377-0.67753-0.77921 0.40518 0.06108-0.61381
   0   3  12 7503.67  959.98   1-0.11714 0.16975 0.96504-0.59110-0.23445 0.78852
   0   3 -12 7838.71 1109.75   1 0.74419-0.79695-0.22527 0.59938-0.62883 0.07485
   0  -3  1324448.94 2051.81   1 0.21933-0.16129 0.59756-0.97178 0.77124-0.17210
   0   3  1321149.47 1690.27   1 0.74720-0.68995 0.66138-0.28705-0.06523 0.66450
   0   3 -1319455.92 1834.45   1 0.20430-0.26210-0.57086 0.94459-0.79521 0.19757
   0  -3 -1325001.70 1805.14   1 0.61592-0.67416-0.78769 0.41367 0.01306-0.61186
   0   3 -1321572.26 1579.08   1 0.74418-0.80135-0.22336 0.59747-0.62951 0.02936
   0  -3  1411790.29 1483.30   1 0.23162-0.16911 0.60439-0.97862 0.76226-0.11704
   0   3  1410864.92  990.23   1 0.73891-0.67726 0.67326-0.29892-0.02690 0.67227
   0   3 -1410073.86 1596.83   1 0.21107-0.27331-0.57716 0.95089-0.78887 0.14527
   0  -3 -1413476.94 1246.44   1 0.60735-0.67008-0.79376 0.41959-0.03246-0.61230
   0   3 -1411968.50 1091.90   1 0.74416-0.80572-0.21799 0.59210-0.63142-0.01488
   0   3  1528810.36 2457.30   1 0.72967-0.66362 0.68371-0.30937 0.01037 0.68109
   0   3 -1527008.59 2837.68   1 0.21519-0.28187-0.58096 0.95469-0.78496 0.09538
   0  -3 -1535648.83 3009.71   1 0.59768-0.66489-0.79813 0.42396-0.07587-0.61495
   0   3 -1531322.33 2544.25   1 0.74407-0.81003-0.20939 0.58350-0.63443-0.05804
   0  -3  16 5589.01 1504.15   1 0.24328-0.17185 0.61076-0.98499 0.75350-0.01610
   0   3  16 6630.37 1372.54   1 0.71954-0.64908 0.69286-0.31853 0.04675 0.69081
   0   3 -16 8819.65 2192.70   1 0.21703-0.28816-0.58266 0.95639-0.78319 0.04764
   0  -3 -1613651.74 1337.12   1 0.58727-0.65897-0.80082 0.42665-0.11742-0.61945
   0   3 -1611850.63 1094.39   1 0.74385-0.81421-0.19774 0.57184-0.63841-0.10022
   0  -3  17 4304.45 1249.51   1 0.24389-0.16799 0.61109-0.98531 0.75304 0.03044
   0   3  17 8552.91 1081.84   1 0.70855-0.63369 0.70083-0.32650 0.08235 0.70130
   0   3 -17 7258.98 1298.66   1 0.21690-0.29247-0.58254 0.95627-0.78332 0.00180
   0  -3 -17 7445.72 1020.54   1 0.57619-0.65237-0.80201 0.42785-0.15735-0.62558
   0   3 -17 9219.96  962.35   1 0.74342-0.81818-0.18315 0.55726-0.64324-0.14156
   0   3  18 3422.44  959.68   1 0.69708-0.61672 0.70745-0.33298 0.11656 0.71328
   0   3 -18 1352.30  618.12   1 0.21502-0.29504-0.58081 0.95454-0.78512-0.04237
   0  -3 -18  890.47  480.03   1 0.56449-0.64514-0.80186 0.42769-0.19585-0.63313
   0   3 -18 1584.62  442.07   1 0.74268-0.82183-0.16571 0.53981-0.64880-0.18216
   0   4   049734.62 1375.15   1 0.65804-0.65804 0.24960 0.24960-0.71040 0.71040
   0  -4   052936.62 1454.94   1 0.45083-0.45083-0.24935-0.24935 0.85707-0.85707
   0   4   047461.78 1366.47   1 0.65452-0.65452 0.24937 0.24937-0.71372 0.71372
   0   4   1 8837.46  804.23   1 0.68943-0.68505 0.30637 0.19283-0.65636 0.70250
   0   4  -1 9665.32  854.14   1 0.61916-0.62352 0.18669 0.31274-0.76274 0.71652
   0  -4  -1 9602.98  836.30   1 0.49704-0.50161-0.33022-0.16836 0.80243-0.84854
   0  -4   1 9758.14  844.99   1 0.39842-0.39385-0.16441-0.33429 0.90234-0.85622
   0   4   1 7537.36  728.83   1 0.62867-0.62429 0.31186 0.18673-0.71239 0.75854
   0   4  -1 7970.72  724.47   1 0.67502-0.67941 0.19151 0.30724-0.71250 0.66633
   0   4   220016.96 1609.61   1 0.71411-0.70536 0.35699 0.14221-0.60215 0.69443
   0   4  -223143.17 1805.14   1 0.57223-0.58095 0.11813 0.38131-0.81153 0.71909
   0  -4  -218902.13 1476.27   1 0.53635-0.54550-0.40474-0.09384 0.74061-0.83283
   0  -4   221236.42 1637.20   1 0.34192-0.33277-0.07850-0.42019 0.93644-0.84421
   0   4   221364.82 1707.09   1 0.59782-0.58904 0.37824 0.12036-0.70678 0.79908
   0   4  -221379.31 1696.75   1 0.69128-0.70006 0.13887 0.35987-0.70911 0.61676
   0   4   316767.05 1408.61   1 0.73301-0.71985 0.40175 0.09741-0.54889 0.68725
   0   4  -315030.29 1183.82   1 0.51766-0.53073 0.04549 0.45395-0.85437 0.71571
   0  -4  -315923.08 1293.63   1 0.56840-0.58207-0.47134-0.02717 0.67435-0.81268
   0  -4   315020.14 1192.58   1 0.28364-0.27014 0.00487-0.50358 0.95891-0.82062
   0   4   313687.85 1130.99   1 0.56107-0.54791 0.44729 0.05131-0.69650 0.83495
   0   4  -314733.59 1198.18   1 0.70396-0.71713 0.09177 0.40698-0.70428 0.56576
   0   4   491815.32 2505.92   1 0.74712-0.72958 0.44138 0.05777-0.49696 0.68144
   0   4  -492692.53 2352.70   1 0.45615-0.47377-0.02878 0.52824-0.88943 0.70462
   0  -4  -4106004.4 2734.97   1 0.59324-0.61148-0.52968 0.03116 0.60620-0.79064
   0  -4   4103714.8 2641.30   1 0.22624-0.20823 0.08322-0.58194 0.97050-0.78611
   0   4   499771.47 2596.38   1 0.51795-0.50038 0.51761-0.01917-0.68102 0.86559
   0   4  -491553.91 2461.38   1 0.71368-0.73124 0.05029 0.44846-0.69865 0.51396
   0   4   545007.24 1781.73   1 0.75724-0.73531 0.47644 0.02272-0.44673 0.67734
   0   4  -544967.29 1616.51   1 0.39112-0.41314-0.10215 0.60161-0.91465 0.68364
   0  -4  -547980.10 1795.56   1 0.61176-0.63455-0.57987 0.08135 0.53803-0.76858
   0   4   550605.83 1882.24   1 0.46895-0.44699 0.58763-0.08918-0.65937 0.89008
   0   4  -547491.26 1832.13   1 0.72102-0.74297 0.01436 0.48439-0.69275 0.46189
   0   4   635717.82 1467.76   1 0.76406-0.73774 0.50750-0.00834-0.39830 0.67503
   0   4  -634419.70 1282.65   1 0.32489-0.35132-0.17164 0.67110-0.93004 0.65283
   0   4  -634971.18 1311.69   1-0.12174 0.09503-0.21643 0.71502-0.96867 0.69260
   0  -4  -637141.94 1440.70   1 0.62483-0.65178-0.62204 0.12338 0.47185-0.74829
   0   4   635398.04 1356.59   1 0.41412-0.38776 0.65561-0.15716-0.63140 0.90826
   0   4  -636603.91 1562.52   1 0.72642-0.75280-0.01609 0.51490-0.68705 0.41006
   0  -4   760511.36 2121.57   1-0.26210 0.29338 0.23417-0.73291 0.93619-0.61380
   0   4   754849.62 2108.80   1 0.76813-0.73732 0.53501-0.03598-0.35175 0.67457
   0   4  -757892.89 2202.01   1-0.07717 0.04602-0.27043 0.76902-0.95964 0.63755
   0  -4  -767719.08 2500.66   1 0.63336-0.66480-0.65799 0.15933 0.40730-0.72982
   0   4   759051.26 3135.17   1 0.35353-0.32278 0.71996-0.22190-0.59721 0.92009
   0   4  -758790.24 2281.40   1 0.73042-0.76120-0.04155 0.54036-0.68172 0.35857
   0  -4   8 9389.14 1042.98   1-0.20178 0.23753 0.28991-0.78865 0.93553-0.56709
   0   4   814189.52 1682.97   1 0.76988-0.73467 0.55961-0.06059-0.30676 0.67570
   0   4  -815899.93 2370.48   1-0.03826 0.00265-0.31612 0.81471-0.94794 0.57985
   0  -4  -810092.21 1223.56   1 0.63814-0.67408-0.68811 0.18945 0.34535-0.71394
   0   4   813113.80 1706.14   1 0.28888-0.25374 0.77894-0.28088-0.55659 0.92559
   0   4  -815886.18 1859.69   1 0.73330-0.76847-0.06221 0.56101-0.67705 0.30772
   0  -4   9 5191.84  901.43   1-0.14735 0.18757 0.33755-0.83629 0.92970-0.51520
   0   4   9 3587.31  734.20   1 0.76967-0.73006 0.58160-0.08258-0.26331 0.67837
   0   4  -9 4608.56  681.41   1-0.00503-0.03471-0.35472 0.85240-0.93495 0.52173
   0  -4  -9 5132.72  702.81   1 0.63986-0.68028-0.71322 0.21456 0.28616-0.70083
   0   4   9 3593.91  553.39   1 0.22066-0.18112 0.83129-0.33323-0.51015 0.92528
   0   4  -9 3535.56  570.42   1 0.73532-0.77489-0.07837 0.57717-0.67317 0.25768
   0  -4  1012870.60 1600.14   1-0.09970 0.14449 0.37766-0.87652 0.92055-0.45915
   0   4  1013495.29 1747.11   1 0.76776-0.72375 0.60131-0.10228-0.22125 0.68243
   0   4 -1015233.23 2105.54   1 0.02309-0.06725-0.38611 0.88378-0.92216 0.46302
   0  -4 -1012298.12 1564.14   1 0.63927-0.68406-0.73382 0.23512 0.22987-0.69048
   0   4  1012795.43 2021.76   1 0.14975-0.10542 0.87579-0.37747-0.45887 0.91999
   0   4 -1017228.73 1299.25   1 0.73668-0.78065-0.09033 0.58914-0.67017 0.20852
   0  -4  1122535.51 1850.75   1-0.05912 0.10840 0.41008-0.90894 0.91012-0.40258
   0   4  1124843.94 1820.32   1 0.76438-0.71596 0.61899-0.11997-0.18045 0.68774
   0   4 -1122318.70 2122.27   1 0.04644-0.09502-0.41163 0.90931-0.91016 0.40511
   0  -4 -1118941.83 2186.89   1 0.63642-0.68569-0.75096 0.25227 0.17609-0.68277
   0   4  1119729.04 1818.71   1 0.07747-0.02871 0.91204-0.41372-0.40270 0.90994
   0   4 -1127800.74 1993.60   1 0.73754-0.78591-0.09839 0.59720-0.66809 0.16027
   0  -4  1235709.49 2557.85   1-0.02535 0.07911 0.43608-0.93494 0.89954-0.34586
   0   4  1229547.93 2272.81   1 0.75967-0.70686 0.63488-0.13585-0.14076 0.69418
   0   4 -1229225.16 2496.68   1 0.06550-0.11850-0.43212 0.92979-0.89943 0.34847
   0  -4 -1233966.47 2538.97   1 0.63186-0.68561-0.76496 0.26627 0.12477-0.67751
   0   4  1224558.36 1902.55   1 0.00497 0.04763 0.93963-0.44105-0.34214 0.89621
   0   4 -1232229.16 2449.72   1 0.73799-0.79075-0.10281 0.60161-0.66693 0.11295
   0  -4  1317230.10 1305.37   1 0.00206 0.05616 0.45656-0.95541 0.88968-0.28986
   0   4  1317505.67 1594.01   1 0.75402-0.69677 0.64884-0.14973-0.10221 0.70148
   0   4 -1318717.47 2041.33   1 0.08077-0.13818-0.44828 0.94596-0.89023 0.29335
   0  -4 -1318541.75 1476.05   1 0.62587-0.68410-0.77624 0.27754 0.07571-0.67451
   0   4  1311777.02 1834.32   1-0.06756 0.12456 0.95782-0.45924-0.27929 0.87953
   0   4 -1319085.13 1531.21   1 0.73808-0.79525-0.10381 0.60261-0.66666 0.06652
   0   4 -1425217.84 2303.08   1 0.09267-0.15451-0.46074 0.95842-0.88267 0.23988
   0  -4 -1426108.85 2011.96   1 0.61865-0.68136-0.78514 0.28644 0.02870-0.67356
   0   4 -1427414.09 2033.82   1 0.73786-0.79942-0.10158 0.60039-0.66725 0.02094
   0   4 -15 1313.43  487.96   1 0.10162-0.16787-0.47002 0.96770-0.87678 0.18808
   0  -4 -15  701.07  485.41   1 0.61061-0.67782-0.79175 0.29286-0.01645-0.67437
   0   4 -15  765.11  437.63   1 0.73732-0.80328-0.09631 0.59511-0.66863-0.02384
   0   4  16 4530.26 1160.97   1 0.73007-0.65961 0.68331-0.18420 0.00888 0.72868
   0   4 -16 2650.25  832.65   1 0.10794-0.17860-0.47653 0.97421-0.87250 0.13788
   0  -4 -16 2703.62  855.84   1 0.60138-0.67307-0.79671 0.29781-0.05992-0.67696
   0   4 -16 3136.49  784.82   1 0.73644-0.80679-0.08810 0.58691-0.67073-0.06790
   0   5   0  307.92  326.11   1 0.69233-0.69233 0.31200 0.31200-0.65062 0.65062
   0  -5   0   68.34  306.00   1 0.48669-0.48669-0.31161-0.31161 0.81610-0.81610
   0   5   0  737.37  395.12   1 0.62878-0.62878 0.31162 0.31162-0.71240 0.71240
   0   5   132465.55 1210.77   1 0.71253-0.70816 0.35354 0.27047-0.60605 0.65218
   0   5  -131924.47 1158.55   1 0.66808-0.67246 0.26706 0.35695-0.69450 0.64836
   0  -5  -127234.66 1032.36   1 0.52054-0.52511-0.37395-0.24927 0.76758-0.81370
   0  -5   126798.98 1023.46   1 0.44918-0.44461-0.24659-0.37678 0.85873-0.81261
   0   5   132259.04 1229.65   1 0.60597-0.60158 0.36155 0.26170-0.70857 0.75472
   0   5  -133362.76 1296.80   1 0.64801-0.65239 0.26504 0.35821-0.71402 0.66787
   0   5   252455.74 1810.26   1 0.72899-0.72022 0.39160 0.23234-0.56143 0.65367
   0   5  -253882.29 1761.62   1 0.63956-0.64831 0.21889 0.40512-0.73691 0.64463
   0  -5  -258112.12 1914.49   1 0.54995-0.55911-0.43232-0.19090 0.71458-0.80681
   0  -5   258015.34 1940.26   1 0.40843-0.39928-0.18019-0.44318 0.89482-0.80259
   0   5   254909.80 1907.32   1 0.57923-0.57046 0.41433 0.20892-0.70200 0.79430
   0   5  -253068.62 1850.82   1 0.66446-0.67324 0.22229 0.40114-0.71348 0.62114
   0   5   3 4449.91  615.09   1 0.74212-0.72896 0.42646 0.19748-0.51708 0.65544
   0   5  -3 6201.83  771.54   1 0.60669-0.61976 0.16781 0.45649-0.77701 0.63835
   0  -5  -310504.15 1208.46   1 0.57486-0.58854-0.48584-0.13730 0.65839-0.79672
   0  -5   310456.68 1202.38   1 0.36578-0.35205-0.11415-0.50922 0.92367-0.78533
   0   5   3 4825.13  821.55   1 0.54826-0.53510 0.46933 0.15392-0.69219 0.83064
   0   5  -3 4820.92  722.66   1 0.67769-0.69086 0.18334 0.44009-0.71211 0.57359
   0   5   412661.30 1363.92   1 0.75230-0.73475 0.45828 0.16567-0.47330 0.65778
   0   5  -412383.45 1251.41   1 0.56976-0.58718 0.11468 0.50961-0.81376 0.62889
   0  -5  -411272.48 1160.71   1 0.59505-0.61328-0.53425-0.08889 0.60040-0.78484
   0  -5   412274.75 1254.64   1 0.32243-0.30442-0.05031-0.57307 0.94525-0.76086
   0   5   412326.90 1284.45   1 0.51260-0.49503 0.52574 0.09731-0.67883 0.86340
   0   5  -411843.54 1287.54   1 0.68850-0.70606 0.14841 0.47502-0.70988 0.52519
   0   5   573308.97 3441.90   1 0.75987-0.73794 0.48728 0.13666-0.43027 0.66088
   0   5  -575192.58 3410.02   1 0.52935-0.55113 0.06052 0.56378-0.84623 0.61514
   0  -5  -580666.41 3705.47   1 0.61091-0.63370-0.57738-0.04576 0.54167-0.77221
   0  -5   579115.00 3602.82   1 0.27973-0.25722 0.01034-0.63373 0.96002-0.72953
   0   5   577495.11 3583.54   1 0.47258-0.45062 0.58276 0.04029-0.66109 0.89180
   0   5  -572123.81 3362.86   1 0.69724-0.71919 0.11754 0.50589-0.70713 0.47626
   0   5   629357.38 1956.38   1 0.76515-0.73883 0.51373 0.11021-0.38808 0.66481
   0   5  -628763.76 1759.20   1 0.48589-0.51231 0.00676 0.61755-0.87399 0.59678
   0  -5  -629276.26 1880.57   1 0.62286-0.64981-0.61495-0.00836 0.48360-0.76004
   0  -5   628285.73 1755.52   1 0.23869-0.21168 0.06654-0.68993 0.96881-0.69222
   0   5   630219.79 1948.90   1 0.42798-0.40162 0.63933-0.01628-0.63880 0.91565
   0   5  -628408.61 1836.14   1 0.70423-0.73057 0.09068 0.53276-0.70415 0.42711
   0   5   726044.26 1879.17   1 0.76842-0.73761 0.53776 0.08601-0.34689 0.66972
   0   5  -726352.91 1740.42   1 0.44162-0.47246-0.04566 0.66998-0.89603 0.57262
   0  -5  -723152.06 1632.29   1 0.63129-0.66273-0.64811 0.02480 0.42592-0.74844
   0  -5   723831.23 1592.51   1 0.20019-0.16867 0.11759-0.74098 0.97267-0.64999
   0   5   725321.56 2253.94   1 0.37853-0.34777 0.69443-0.07186-0.61194 0.93481
   0   5  -722928.79 1631.44   1 0.70975-0.74049 0.06773 0.55571-0.70118 0.37796
   0   5   8 1807.47  493.30   1 0.76988-0.73468 0.55978 0.06399-0.30644 0.67538
   0   5  -8 1352.59  264.36   1 0.39737-0.43261-0.09533 0.71966-0.91269 0.54307
   0   5  -8 2982.01  512.16   1-0.16469 0.12908-0.16264 0.78588-0.97284 0.60474
   0  -5  -8 1123.84  382.87   1 0.63666-0.67259-0.67686 0.05354 0.36947-0.73807
   0   5  -8  924.45  419.93   1 0.71405-0.74918 0.04857 0.57487-0.69839 0.32901
   0   5   926756.24 2029.53   1 0.76975-0.73014 0.57989 0.04388-0.26682 0.68188
   0   5  -924098.05 1694.57   1 0.35444-0.39408-0.14124 0.76556-0.92435 0.50853
   0   5  -929937.49 2115.86   1-0.13285 0.09279-0.20268 0.82593-0.97018 0.55608
   0  -5  -922786.63 1692.69   1 0.63937-0.67980-0.70161 0.07829 0.31453-0.72920
   0   5   925028.21 1805.29   1 0.26814-0.22860 0.79587-0.17330-0.54284 0.95796
   0   5  -925012.01 1883.58   1 0.71733-0.75684 0.03304 0.59039-0.69594 0.28038
   0   5  10 1711.83  495.23   1 0.76818-0.72416 0.59826 0.02551-0.22797 0.68914
   0   5 -10 2599.73  512.09   1-0.10461 0.06010-0.23740 0.86064-0.96576 0.50564
   0  -5 -10 1224.54  423.84   1 0.63979-0.68471-0.72277 0.09945 0.26124-0.72199
   0   5  10 1892.69  379.52   1 0.20769-0.16376 0.84018-0.21761-0.50094 0.96219
   0   5 -10 2547.17  595.14   1 0.71974-0.76364 0.02100 0.60243-0.69391 0.23218
   0   5  1128191.57 2353.74   1 0.76529-0.71688 0.61504 0.00873-0.18984 0.69714
   0   5 -1128977.17 2812.46   1-0.07996 0.03100-0.26711 0.89035-0.96034 0.45421
   0  -5 -1125012.44 2069.25   1 0.63844-0.68771-0.74052 0.11715 0.20978-0.71646
   0   5  1122242.55 2269.89   1 0.14424-0.09549 0.87887-0.25598-0.45471 0.96195
   0   5 -1132353.10 2664.92   1 0.72142-0.76971 0.01229 0.61115-0.69238 0.18448
   0   5 -12 1200.19  353.86   1-0.05877 0.00536-0.29220 0.91544-0.95454 0.40240
   0  -5 -12 1011.34  577.17   1 0.63517-0.68893-0.75562 0.13225 0.15992-0.71265
   0   5  12  421.47  174.10   1 0.07879-0.02560 0.91146-0.28856-0.40376 0.95711
   0   5 -12  150.95  430.01   1 0.72245-0.77513 0.00675 0.61669-0.69138 0.13730
   0   5  13 9942.64 1092.79   1 0.75620-0.69896 0.64403-0.02014-0.11560 0.71487
   0   5 -13 8355.37 1390.77   1-0.04087-0.01698-0.31309 0.93633-0.94884 0.35068
   0  -5 -1316203.66 1517.59   1 0.63042-0.68865-0.76817 0.14480 0.11168-0.71048
   0   5 -1313907.07 1458.01   1 0.72284-0.78000 0.00436 0.61913-0.69099 0.09084
   0   5  14 2677.34  869.22   1 0.74993-0.68828 0.65673-0.03284-0.07932 0.72469
   0   5 -14 2439.39  639.80   1-0.02603-0.03627-0.33020 0.95344-0.94355 0.29938
   0   5 -14 2996.94  760.60   1 0.72276-0.78432 0.00478 0.61872-0.69107 0.04475
   0   6   0 9254.11 1255.84   1 0.72181-0.72181 0.37440 0.37440-0.58206 0.58206
   0  -6   0 7614.81 1055.62   1 0.52053-0.52053-0.37394-0.37394 0.76760-0.76760
   0   6   010380.35 1434.82   1 0.59994-0.59994 0.37395 0.37395-0.70726 0.70726
   0   6   1 1081.37  309.84   1 0.73429-0.72990 0.40505 0.34368-0.54474 0.59086
   0   6  -1 1944.25  393.42   1 0.70706-0.71144 0.34183 0.40698-0.61903 0.57289
   0  -6  -1 2652.71  519.83   1 0.54557-0.55014-0.42331-0.32456 0.72329-0.76940
   0  -6   1 2931.05  569.85   1 0.49278-0.48821-0.32253-0.42535 0.80816-0.76205
   0   6   1 1341.97  438.25   1 0.57871-0.57433 0.41530 0.33260-0.70185 0.74800
   0   6  -1 2041.93  535.14   1 0.61832-0.62271 0.33515 0.41275-0.71087 0.66472
   0   6   233400.63 2346.97   1 0.74465-0.73588 0.43386 0.31488-0.50719 0.59943
   0   6  -236177.60 2496.14   1 0.68999-0.69874 0.30746 0.44135-0.65526 0.56299
   0  -6   236288.84 2507.97   1 0.46303-0.45388-0.27002-0.47803 0.84420-0.75198
   0   6   239470.77 2793.51   1 0.55440-0.54563 0.45888 0.28902-0.69430 0.78660
   0   6  -236394.82 2586.72   1 0.63412-0.64289 0.29914 0.44876-0.71302 0.62072
   0   6   3 3024.30  790.78   1 0.75303-0.73987 0.46082 0.28791-0.46965 0.60801
   0   6  -3 1611.82  362.04   1 0.67056-0.68368 0.27145 0.47736-0.69040 0.55199
   0  -6  -3 1348.24  335.24   1 0.58663-0.60031-0.51339-0.23438 0.62632-0.76465
   0  -6   3 1764.96  419.85   1 0.43135-0.41762-0.21708-0.53096 0.87567-0.73733
   0   6   3 2016.41  444.38   1 0.52659-0.51341 0.50420 0.24346-0.68445 0.82287
   0   6  -3 1741.11  624.59   1 0.64759-0.66075 0.26610 0.48180-0.71400 0.57556
   0   6   434808.71 2475.43   1 0.75957-0.74203 0.48600 0.26273-0.43224 0.61673
   0   6  -433925.36 2348.98   1 0.64883-0.66632 0.23407 0.51474-0.72403 0.53948
   0  -6  -443651.79 3005.40   1 0.60237-0.62060-0.55341-0.19436 0.57521-0.75965
   0  -6   443439.92 2994.56   1 0.39866-0.38036-0.16478-0.58327 0.90217-0.71771
   0   6   435731.58 2533.88   1 0.49548-0.47790 0.55095 0.19672-0.67153 0.85609
   0   6  -436445.41 2633.67   1 0.65938-0.67694 0.23635 0.51177-0.71368 0.52899
   0   6   5 1242.75  608.19   1 0.76442-0.74248 0.50948 0.23925-0.39506 0.62567
   0   6  -5 1223.34  309.07   1 0.62489-0.64667 0.19556 0.55360-0.75581 0.52472
   0  -6  -5  663.27  364.10   1 0.61505-0.63784-0.58984-0.15793 0.52324-0.75379
   0  -6   5  192.96  258.78   1 0.36568-0.34281-0.11401-0.63404 0.92372-0.69315
   0   6   5 1321.67  381.56   1 0.46073-0.43877 0.59845 0.14921-0.65541 0.88612
   0   6  -5  668.59  411.02   1 0.66893-0.69088 0.20955 0.53857-0.71317 0.48230
   0   6   6 2256.63  671.77   1 0.76770-0.74129 0.53125 0.21728-0.35832 0.63503
   0  -6  -6 3784.43  788.44   1 0.62490-0.65185-0.62230-0.12567 0.47140-0.74785
   0  -6   6 2998.45  605.37   1 0.33310-0.30609-0.06585-0.68220 0.94058-0.66399
   0   6  -6 3161.09  755.09   1 0.67686-0.70320 0.18590 0.56222-0.71224 0.43520
   0   6   726554.30 1993.28   1 0.76952-0.73871 0.55161 0.19691-0.32178 0.64460
   0  -6  -727181.89 1981.51   1 0.63204-0.66349-0.65160-0.09637 0.41943-0.74195
   0  -6   728489.87 2028.46   1 0.30158-0.27007-0.02041-0.72765 0.95322-0.63053
   0   6   718111.36 2553.03   1 0.37979-0.34904 0.69309 0.05399-0.61267 0.93554
   0   6   8 4750.10  905.99   1 0.77000-0.73479 0.57055 0.17798-0.28557 0.65451
   0  -6  -8 3112.72  589.48   1 0.63676-0.67270-0.67759-0.07039 0.36796-0.73655
   0  -6   8 4725.63  769.91   1 0.27162-0.23560 0.02159-0.76966 0.96216-0.59337
   0   6   8 3857.67  690.96   1 0.33394-0.29880 0.73887 0.00821-0.58527 0.95428
   0   6  -8 3968.82  757.81   1 0.68864-0.72376 0.14792 0.60020-0.70984 0.34046
   0   6   9  144.88  459.09   1 0.76923-0.72962 0.58814 0.16038-0.24971 0.66477
   0  -6  -9  842.51  435.39   1 0.63929-0.67972-0.70046-0.04752 0.31726-0.73192
   0  -6   9 1455.38  463.97   1 0.24363-0.20311 0.05988-0.80794 0.96801-0.55313
   0   6   9  129.43  210.18   1 0.28454-0.24501 0.78255-0.03546-0.55374 0.96887
   0   6  -9 1272.57  648.85   1 0.69282-0.73233 0.13348 0.61464-0.70864 0.29308
   0   6  10 2611.08  720.87   1 0.76728-0.72327 0.60447 0.14406-0.21418 0.67536
   0  -6 -10 4186.31  960.27   1 0.63985-0.68477-0.72043-0.02754 0.26749-0.72823
   0  -6  10 4237.31  891.75   1 0.21791-0.17289 0.09429-0.84236 0.97140-0.51042
   0   6  10 2222.56  679.24   1 0.23180-0.18787 0.82338-0.07629-0.51797 0.97922
   0   6 -10 5458.80 1288.63   1 0.69603-0.73993 0.12198 0.62614-0.70757 0.24584
   0  -6 -11 6238.98  669.01   1 0.63885-0.68812-0.73754-0.01049 0.21884-0.72551
   0  -6  11 5121.73 1062.19   1 0.19463-0.14511 0.12482-0.87289 0.97289-0.46582
   0   6  11 3500.79 1104.52   1 0.17570-0.12694 0.86049-0.11301-0.47821 0.98545
   0   6 -11 7480.88  862.23   1 0.69837-0.74666 0.11333 0.63479-0.70670 0.19879
   0  -7   0  700.44  305.91   1 0.55185-0.55185-0.43626-0.43626 0.71072-0.71072
   0   7   0   84.55  449.76   1 0.56727-0.56727 0.43627 0.43627-0.69846 0.69846
   0   7   1 3468.97  785.10   1 0.75255-0.74816 0.45914 0.41439-0.47207 0.51819
   0  -7  -1 4302.32  923.37   1 0.57040-0.57496-0.47580-0.39660 0.66951-0.71562
   0  -7   1 3542.50  742.47   1 0.53147-0.52689-0.39510-0.47742 0.74928-0.70317
   0   7   1 3876.35  905.88   1 0.54706-0.54268 0.47134 0.40121-0.69177 0.73792
   0   7  -1 5265.86 1146.70   1 0.58509-0.58947 0.40323 0.46932-0.70361 0.65746
   0   7   2 7511.56  999.53   1 0.75828-0.74950 0.48058 0.39295-0.44051 0.53275
   0  -7  -2 9424.52 1162.39   1 0.58666-0.59577-0.51345-0.35895 0.62625-0.71847
   0  -7   2 8454.72 1013.40   1 0.50936-0.50021-0.35288-0.51964 0.78487-0.69264
   0   7   2 8837.98 1206.08   1 0.52411-0.51532 0.50809 0.36418-0.68348 0.77576
   0   7  -210197.32 1347.86   1 0.60070-0.60947 0.37241 0.50014-0.70743 0.61513
   0   7   3 1641.05  516.76   1 0.76283-0.74967 0.50106 0.37247-0.40867 0.54704
   0  -7  -3 2074.53  571.62   1 0.60067-0.61434-0.54886-0.32354 0.58132-0.71964
   0  -7   3  802.96  288.45   1 0.48586-0.47213-0.31013-0.56239 0.81716-0.67882
   0   7   3 1191.18  460.69   1 0.49858-0.48540 0.54647 0.32580-0.67288 0.81131
   0   7  -3 2403.50  815.82   1 0.61428-0.62744 0.34394 0.52861-0.71018 0.57173
   0   7   4 1879.48  526.90   1 0.76624-0.74869 0.52058 0.35295-0.37665 0.56114
   0  -7  -4 1818.54  557.23   1 0.61241-0.63065-0.58183-0.29057 0.53517-0.71961
   0  -7   4 3323.37  785.94   1 0.46162-0.44332-0.26761-0.60511 0.84574-0.66128
   0   7   4 3138.61  828.56   1 0.47016-0.45259 0.58601 0.28626-0.65994 0.84451
   0   7  -4 4458.35 1127.74   1 0.62603-0.64357 0.31792 0.55463-0.71204 0.52744
   0   7   511886.59  913.26   1 0.76854-0.74653 0.53901 0.33428-0.34467 0.57526
   0  -7  -510410.66  742.67   1 0.62193-0.64472-0.61223-0.26017 0.48822-0.71877
   0  -7   510766.43  729.21   1 0.43653-0.41365-0.22558-0.64714 0.87095-0.64038
   0   7   512175.83  849.44   1 0.43872-0.41676 0.62631 0.24596-0.64439 0.87510
   0   7  -5 9123.35  949.62   1 0.63610-0.65802 0.29444 0.57811-0.71321 0.48247
   0   7   6 1009.46  408.22   1 0.76977-0.74336 0.55661 0.31668-0.31245 0.58916
   0  -7  -6 1703.19  505.60   1 0.62936-0.65631-0.63972-0.23291 0.44119-0.71763
   0  -7   6  613.14  275.60   1 0.41129-0.38384-0.18474-0.68798 0.89258-0.61590
   0   7   6 1722.43  541.29   1 0.40417-0.37781 0.66693 0.20534-0.62597 0.90282
   0   7  -6 1030.41  491.02   1 0.64465-0.67097 0.27351 0.59904-0.71386 0.43696
  -1   0  1915615.86 1811.78   1 0.54614-0.52099 0.72331-0.72331 0.42254 0.45318
   1   0 -1918115.24 2102.94   1 0.45919-0.48422-0.76554 0.76554-0.45064-0.42363
  -1   0  1811248.99 1010.48   1 0.55979-0.53911 0.72507-0.72507 0.40112 0.42851
   1   0 -1810324.98 1032.82   1 0.47158-0.49215-0.77204 0.77204-0.42610-0.40216
   1   0 -18 9329.83 1366.92   1 0.67617-0.69701-0.59675 0.59675-0.43205-0.39756
  -1   0  17  737.51  538.49   1 0.57269-0.55648 0.72632-0.72632 0.38009 0.40345
   1   0 -17 2338.15  684.77   1 0.48357-0.49969-0.77791 0.77791-0.40125-0.38099
   1   0 -17 1675.07  495.37   1 0.66145-0.67781-0.63075 0.63075-0.40575-0.37777
  -1   0  1645111.67 3282.73   1 0.58485-0.57311 0.72711-0.72711 0.35951 0.37794
   1   0 -1648715.83 3606.52   1 0.49519-0.50685-0.78317 0.78317-0.37605-0.36018
   1   0 -1648774.55 3515.66   1 0.64573-0.65762-0.66272 0.66272-0.37923-0.35820
  -1   0  1533493.22 2120.13   1 0.59614-0.58894 0.72751-0.72751 0.33960 0.35193
   1   0 -1529823.94 1939.83   1 0.50647-0.51367-0.78783 0.78783-0.35043-0.33978
   1   0 -1532305.77 2030.36   1 0.62898-0.63637-0.69300 0.69300-0.35231-0.33877
  -1   0  1424253.18 1378.01   1 0.60682-0.60408 0.72750-0.72750 0.32015 0.32528
   1   0 -1423766.26 1345.31   1 0.51743-0.52018-0.79188 0.79188-0.32431-0.31989
   1   0 -1422544.55 1213.88   1 0.61140-0.61432-0.72137 0.72137-0.32528-0.31973
  -1   0  13130426.2 4609.94   1 0.61672-0.61845 0.72716-0.72716 0.30144 0.29788
   1   0 -13138292.8 4928.79   1 0.52810-0.52639-0.79532 0.79532-0.29758-0.30060
   1   0 -13137760.1 4863.53   1 0.59289-0.59134-0.74813 0.74813-0.29793-0.30100
  -1   0  12 2703.65  498.91   1 0.62583-0.63202 0.72654-0.72654 0.28365 0.26957
   1   0 -12 2862.09  473.47   1 0.53851-0.53234-0.79815 0.79815-0.27010-0.28207
   1   0 -12 2095.37  386.68   1 0.57343-0.56741-0.77340 0.77340-0.27022-0.28264
  -1   0  11  232.23  312.10   1 0.63407-0.64473 0.72570-0.72570 0.26700 0.24012
   1   0 -11 2434.05  663.18   1 0.54906-0.53867-0.79993 0.79993-0.24214-0.26446
   1   0 -11 1601.06  566.02   1 0.55297-0.54248-0.79725 0.79725-0.24206-0.26473
  -1   0  1073728.87 3565.73   1 0.64137-0.65649 0.72473-0.72473 0.25180 0.20922
   1   0 -1073807.78 3585.37   1 0.55913-0.54425-0.80139 0.80139-0.21245-0.24809
   1   0 -1073166.23 3535.73   1 0.53144-0.51648-0.81978 0.81978-0.21334-0.24737
  -1   0   947947.20 2166.98   1 0.64758-0.66717 0.72370-0.72370 0.23849 0.17642
   1   0  -949281.45 2239.08   1 0.56909-0.54973-0.80207 0.80207-0.18112-0.23337
   1   0  -944960.23 2047.11   1 0.50880-0.48942-0.84098 0.84098-0.18402-0.23067
  -1   0   818088.65 1659.10   1 0.65248-0.67653 0.72277-0.72277 0.22774 0.14107
   1   0  -818447.74 1712.96   1 0.57902-0.55518-0.80185 0.80185-0.14752-0.22091
   1   0  -817295.46 1556.51   1-0.15825 0.18294 0.96773-0.96773-0.19609-0.17328
   1   0  -817979.47 1642.58   1 0.48468-0.46082-0.86107 0.86107-0.15370-0.21491
  -1   0   7288015.2 2597.22   1 0.65569-0.68421 0.72209-0.72209 0.22056 0.10215
   1   0  -7303370.9 2769.32   1 0.58904-0.56072-0.80048 0.80048-0.11069-0.21169
   1   0  -7292554.1 2615.10   1 0.45889-0.43055-0.88004 0.88004-0.12219-0.20035
  -1   0   511956.61 1091.72   1 0.65392-0.69137 0.72247-0.72247 0.22453 0.00598
   1   0  -511568.94 1069.44   1 0.61002-0.57274-0.79214 0.79214-0.01939-0.21088
  -1   0   510340.18  958.36   1 0.63896-0.67629-0.73658 0.73658 0.22173 0.00857
   1   0  -511270.11 1067.03   1 0.40014-0.36284-0.91489 0.91489-0.05342-0.17696
  -1   0   4417314.0 3397.05   1 0.64521-0.68712 0.72411-0.72411 0.24361-0.05920
   1   0  -4433249.7 3540.93   1 0.62116-0.57936-0.78243 0.78243 0.04407-0.22831
  -1   0   4409940.4 3342.36   1 0.63963-0.68143-0.72959 0.72959 0.24199-0.05774
  -1   0   3220551.2 1840.71   1 0.62448-0.67086 0.72665-0.72665 0.28632-0.14802
   1   0  -3226306.6 1883.04   1 0.63293-0.58664-0.76232 0.76232 0.13514-0.27333
  -1   0   271467.66 1769.65   1 0.57459-0.62542 0.72647-0.72647 0.37692-0.28474
   1   0  -279913.82 1970.39   1 0.63980-0.58905-0.71075 0.71075 0.29235-0.38450
  -1   0   1  168.56   86.63   1 0.43212-0.48742 0.69496-0.69496 0.57470-0.52861
   1   0  -1   15.53   72.77   1 0.58170-0.52650-0.50164 0.50164 0.64028-0.68639
   1   0  -1   25.69   79.63   1-0.13483 0.19023 0.96657-0.96657-0.21807 0.17190
  -1   0   0   29.00   69.71   1-0.02988-0.02988 0.43265-0.43265 0.90106-0.90106
   1   0   0   11.12   68.89   1 0.02988 0.02988 0.47673-0.47673 0.87854-0.87854
  -1   0   0   18.21   69.32   1-0.02982-0.02982-0.32585 0.32585-0.94494 0.94494
   1   0   0   -5.82   69.30   1 0.02979 0.02979-0.39348 0.39348-0.91884 0.91884
  -1   0   0   40.81   69.72   1-0.02988-0.02988 0.94949-0.94950-0.31234 0.31234
   1   0   0   -2.49   69.68   1 0.02987 0.02987 0.93094-0.93094-0.36392 0.36392
   1   0   1  -73.53   80.15   1 0.60783-0.54370 0.16951-0.16951-0.77575 0.82197
  -1   0  -1  -72.72   85.93   1 0.37610-0.44019-0.71305 0.71305-0.59168 0.54568
  -1   0  -1   58.62   72.00   1 0.39999-0.46412 0.67161-0.67161-0.62365 0.57751
   1   0   2351549.5 2777.37   1 0.74972-0.68118 0.44965-0.44965-0.48551 0.57775
  -1   0  -2357836.9 2821.74   1 0.71422-0.78273 0.35724-0.35724-0.60187 0.50960
   1   0   2364248.1 2924.57   1 0.52066-0.45209-0.79298 0.79298-0.31636 0.40839
   1   0   2333355.7 2586.18   1 0.67577-0.60717-0.59774 0.59774-0.43131 0.52349
   1   0   3 4230.05  423.51   1 0.76965-0.69666 0.55386-0.55386-0.31760 0.45595
   1   0   3 3760.34  395.01   1 0.56051-0.48739-0.80153 0.80153-0.20823 0.34639
  -1   0  -3 3463.60  331.96   1 0.68627-0.75935-0.57051 0.57051-0.45114 0.31287
   1   0   3 3011.93  293.73   1 0.50439-0.43125-0.84483 0.84483-0.17841 0.31664
   1   0   4105215.2 2638.85   1 0.76723-0.68984 0.60482-0.60482-0.21340 0.39787
  -1   0  -497553.28 2440.19   1 0.76034-0.83766 0.48934-0.48934-0.42709 0.24261
   1   0   499659.21 2530.37   1 0.58205-0.50444-0.80157 0.80157-0.13674 0.32096
  -1   0  -497584.46 2429.49   1 0.64644-0.72399-0.66136 0.66136-0.38040 0.19604
   1   0   494627.02 2358.62   1 0.40926-0.33164-0.91017 0.91017-0.06385 0.24816
  -1   0  -5487828.2 3958.82   1 0.76382-0.84552 0.50621-0.50621-0.40039 0.16979
   1   0   5501035.4 4164.50   1 0.59605-0.51396-0.79867 0.79867-0.08271 0.31298
  -1   0  -5512338.9 4086.16   1 0.63014-0.71217-0.69100 0.69100-0.35414 0.12378
  -1   0  -6124941.8 3143.85   1 0.76498-0.85107 0.51273-0.51273-0.38974 0.11301
  -1   0  -6133646.1 3416.69   1 0.52133-0.60773-0.79320 0.79320-0.31470 0.03861
  -1   0  -6120526.0 3060.50   1 0.62597-0.71246-0.69808 0.69808-0.34760 0.07116
   1   0   6128175.2 3194.71   1 0.29777-0.21110-0.95284 0.95284 0.05850 0.21800
   1   0   749699.08 2219.92   1 0.74049-0.64991 0.67120-0.67120-0.03380 0.35649
  -1   0  -735897.26 1599.21   1 0.76511-0.85558 0.51347-0.51347-0.38852 0.06567
  -1   0  -744165.66 1998.47   1 0.51908-0.60993-0.79244 0.79244-0.32027-0.00182
  -1   0  -748515.04 2122.99   1 0.62833-0.71930-0.69410 0.69410-0.35130 0.02879
   1   0   8102407.5 2654.12   1 0.73015-0.63516 0.68322-0.68322 0.00856 0.36021
  -1   0  -8103464.5 2754.77   1 0.51518-0.61049-0.79109 0.79109-0.32978-0.03833
  -1   0  -896381.27 2461.87   1 0.63441-0.72984-0.68356 0.68356-0.36090-0.00767
   1   0   9 2513.51  526.79   1 0.71947-0.62008 0.69292-0.69292 0.04698 0.36789
  -1   0  -9 2216.17  432.49   1 0.51008-0.60985-0.78922 0.78922-0.34196-0.07216
  -1   0  -9 1750.70  318.75   1 0.64267-0.74258-0.66852 0.66852-0.37422-0.04058
   1   0  1024513.68 2194.77   1 0.70845-0.60466 0.70089-0.70089 0.08266 0.37831
  -1   0 -1021241.76 1948.96   1 0.50405-0.60827-0.78686 0.78687-0.35604-0.10410
  -1   0 -1021051.03 1837.59   1-0.14308 0.03945 0.96709-0.96709-0.21037-0.25134
  -1   0 -1023969.73 2111.08   1 0.65219-0.75657-0.65004 0.65004-0.38997-0.07092
   1   0  11478379.038261.11   1 0.69745-0.58857 0.70725-0.70725 0.11550 0.39161
  -1   0 -11502996.540252.26   1 0.49723-0.60591-0.78405 0.78405-0.37151-0.13464
  -1   0 -11397237.031754.74   1-0.10853 0.00052 0.96409-0.96409-0.24235-0.26554
  -1   0 -11462692.436991.24   1 0.66239-0.77124-0.62869 0.62869-0.40739-0.09959
   1   0  1275918.10 2746.55   1 0.68566-0.57231 0.71276-0.71276 0.14774 0.40548
  -1   0 -1284882.60 3011.97   1 0.67287-0.78620-0.60476 0.60476-0.42601-0.12705
   1   0  1380535.65 2616.14   1 0.67342-0.55561 0.71728-0.71728 0.17886 0.42046
  -1   0 -1388734.78 2939.80   1 0.48164-0.59923-0.77699 0.77699-0.40533-0.19285
  -1   0 -1382654.19 2602.84   1 0.68335-0.80114-0.57840 0.57840-0.44551-0.15365
   1   0  1422925.32 1292.90   1 0.66071-0.53843 0.72091-0.72091 0.20913 0.43630
  -1   0 -1423276.35 1347.01   1 0.47297-0.59502-0.77274 0.77274-0.42327-0.22093
  -1   0 -1420780.61 2463.41   1 0.69359-0.81586-0.54963 0.54963-0.46564-0.17961
   1   0  15  420.45  379.34   1 0.64748-0.52074 0.72372-0.72372 0.23871 0.45282
  -1   0 -15  319.29  460.29   1 0.46377-0.59028-0.76799 0.76799-0.44170-0.24851
  -1   0 -15 1018.33  346.26   1 0.70341-0.83015-0.51843 0.51843-0.48624-0.20510
   1   0  1630569.07 2182.44   1 0.63370-0.50249 0.72575-0.72575 0.26777 0.46986
  -1   0 -1630312.34 2234.88   1 0.45405-0.58501-0.76272 0.76272-0.46053-0.27569
  -1   0 -1627230.79 1893.35   1 0.71263-0.84385-0.48466 0.48466-0.50719-0.23024
   1   0  1759431.66 4640.03   1 0.61934-0.48367 0.72702-0.72702 0.29640 0.48733
  -1   0 -1763157.05 4952.18   1 0.44382-0.57924-0.75692 0.75692-0.47968-0.30256
   1   0  18 5688.81  906.69   1 0.60436-0.46422 0.72754-0.72754 0.32469 0.50514
  -1   0 -18 5898.93 1055.61   1 0.43306-0.57286-0.75068 0.75068-0.49892-0.32908
   1   0  19 1485.57  440.79   1 0.58887-0.44419 0.72728-0.72728 0.35252 0.52320
  -1   0 -19 2220.26  630.49   1 0.42182-0.56608-0.74376 0.74376-0.51853-0.35547
  -1  -1  19 9065.54 1160.11   1 0.46560-0.44046 0.70550-0.83030 0.53428 0.34143
  -1   1  19 9425.16 1208.91   1 0.60349-0.57843 0.72754-0.60272 0.32628 0.54966
   1   1 -1910557.92 1317.30   1 0.39591-0.42089-0.72683 0.85147-0.56121-0.31279
   1  -1 -19 8558.95 1173.94   1 0.50727-0.53230-0.78814 0.66354-0.34857-0.52569
  -1  -1  1816107.22 1153.43   1 0.47748-0.45680 0.70883-0.83363 0.51919 0.31044
  -1   1  1815068.70 1188.55   1 0.61754-0.59695 0.72712-0.60230 0.29987 0.52997
   1   1 -1816340.61 1259.95   1 0.40649-0.42702-0.73390 0.85854-0.54419-0.28381
   1  -1 -1819291.92 1337.73   1 0.52024-0.54081-0.79284 0.66824-0.31741-0.51084
   1   1 -1815592.24 1034.04   1 0.71521-0.73613-0.47387 0.59857-0.51372-0.31592
  -1  -1  17  256.50  400.98   1 0.48824-0.47203 0.71166-0.83646 0.50512 0.27841
   1   1 -17 1149.19  604.49   1 0.41645-0.43252-0.74036 0.86500-0.52766-0.25434
   1  -1 -17 1455.31  504.49   1 0.53282-0.54894-0.79667 0.67208-0.28529-0.49695
   1   1 -17 1271.16  537.22   1 0.70807-0.72443-0.50203 0.62678-0.49658-0.28693
   1  -1 -17  773.72  396.94   1 0.59042-0.60676-0.75149 0.62678-0.29437-0.48885
  -1  -1  1634665.73 2467.38   1 0.49782-0.48608 0.71401-0.83881 0.49228 0.24516
  -1   1  1635426.71 2520.36   1 0.64376-0.63210 0.72435-0.59953 0.24672 0.49091
   1   1 -1643858.49 3102.83   1 0.42576-0.43738-0.74621 0.87086-0.51174-0.22426
   1  -1 -1633708.56 2473.21   1 0.54505-0.55670-0.79961 0.67502-0.25206-0.48417
   1   1 -1640012.58 2841.30   1 0.70051-0.71241-0.52808 0.65283-0.48000-0.25743
   1  -1 -1632137.68 2250.35   1 0.56264-0.57450-0.78630 0.66159-0.25525-0.48190
  -1  -1  15108446.3 6927.76   1 0.50614-0.49887 0.71593-0.84072 0.48089 0.21046
  -1   1  1594437.79 6054.55   1 0.65598-0.64878 0.72202-0.59720 0.21991 0.47161
   1   1 -15108957.4 6974.75   1 0.43439-0.44156-0.75148 0.87612-0.49655-0.19345
   1  -1 -15110786.3 7109.96   1 0.55725-0.56478-0.80117 0.67645-0.21814-0.47268
   1   1 -1599248.63 6343.18   1 0.69279-0.70021-0.55201 0.67677-0.46401-0.22733
   1  -1 -15104673.2 6646.50   1 0.53254-0.53994-0.81869 0.69398-0.21479-0.47628
  -1  -1  1436581.14 1846.15   1 0.51306-0.51025 0.71742-0.84222 0.47123 0.17403
  -1   1  1438632.69 1914.35   1 0.66763-0.66489 0.71906-0.59424 0.19290 0.45253
   1   1 -1442646.67 2132.51   1 0.44240-0.44515-0.75609 0.88069-0.48227-0.16192
   1  -1 -1440842.66 2097.35   1 0.56882-0.57187-0.80206 0.67734-0.18199-0.46278
   1   1 -1438720.53 1918.01   1 0.68505-0.68800-0.57384 0.69860-0.44877-0.19648
   1  -1 -1435234.97 1711.32   1 0.50010-0.50312-0.84850 0.72386-0.17298-0.47210
  -1  -1  1368069.17 2241.23   1 0.51838-0.52005 0.71852-0.84332 0.46368 0.13549
  -1   1  1361669.44 2122.59   1 0.67874-0.68047 0.71545-0.59063 0.16562 0.43371
   1   1 -1373991.34 2501.71   1 0.44950-0.44779-0.76017 0.88477-0.46911-0.12907
   1  -1 -1370829.32 2427.50   1 0.58004-0.57860-0.80176 0.67704-0.14393-0.45477
   1   1 -1368054.85 2307.92   1 0.67746-0.67594-0.59355 0.71830-0.43443-0.16473
   1  -1 -1370567.45 2322.35   1 0.46456-0.46309-0.87608 0.75144-0.12904-0.46996
  -1  -1  12 7515.02  753.24   1 0.52183-0.52797 0.71920-0.84400 0.45872 0.09436
  -1   1  12 8756.95  945.44   1 0.68932-0.69552 0.71118-0.58636 0.13799 0.41524
   1   1 -12 8033.31  866.40   1 0.45569-0.44952-0.76363 0.88822-0.45739-0.09478
   1  -1 -12 7897.47  838.61   1 0.59088-0.58496-0.80008 0.67536-0.10355-0.44911
   1   1 -12 7186.79  832.88   1 0.67021-0.66421-0.61106 0.73581-0.42120-0.13187
   1  -1 -12 7630.97  811.99   1 0.42569-0.41974-0.90106 0.77642-0.08285-0.47008
  -1  -1  1140098.55 1225.48   1 0.52303-0.53364 0.71943-0.84423 0.45700 0.04999
  -1   1  1136904.51 3059.33   1 0.69940-0.71006 0.70621-0.58139 0.10991 0.39721
   1   1 -1140398.97 1264.77   1 0.46081-0.45018-0.76641 0.89100-0.44750-0.05865
   1  -1 -1145789.45 1447.57   1 0.60130-0.59090-0.79674 0.67202-0.06027-0.44633
   1   1 -1137415.63 3096.90   1 0.66351-0.65305-0.62624 0.75099-0.40934-0.09764
   1  -1 -1140199.65 1262.29   1 0.38292-0.37249-0.92315 0.79851-0.03397-0.47288
  -1  -1  1096986.64 2545.15   1 0.52139-0.53647 0.71911-0.84391 0.45936 0.00154
  -1   1  10102002.2 2702.22   1 0.70863-0.72434 0.70078-0.57600 0.08211 0.37886
   1   1 -10102433.6 2702.99   1 0.46462-0.44953-0.76843 0.89303-0.44002-0.02011
   1  -1 -1098480.67 2624.96   1 0.61122-0.59634-0.79134 0.66662-0.01335-0.44719
   1   1 -10106494.8 2826.71   1 0.65763-0.64269-0.63887 0.76362-0.39918-0.06171
   1  -1 -1097603.71 2544.63   1 0.33593-0.32114-0.94171 0.81705 0.01797-0.47883
  -1  -1   963276.29 3058.14   1 0.51606-0.53561 0.71805-0.84285 0.46698-0.05216
  -1   1   954972.97 2707.22   1 0.71778-0.73790 0.69426-0.56949 0.05269 0.36218
   1   1  -960363.81 2941.55   1 0.46676-0.44722-0.76956 0.89415-0.43577 0.02164
   1  -1  -966901.14 3266.27   1 0.62022-0.60081-0.78349 0.65882 0.03818-0.45274
   1   1  -954674.28 2714.52   1 0.65289-0.63348-0.64864 0.77339-0.39114-0.02366
   1  -1  -961431.24 2961.97   1 0.28289-0.26361-0.95629 0.83163 0.07399-0.48876
  -1  -1   823531.26 1118.45   1 0.50572-0.52973 0.71583-0.84063 0.48148-0.11275
  -1   1   829262.78 1396.05   1 0.72649-0.75101 0.68681-0.56203 0.02224 0.34653
   1   1  -829143.87 1359.89   1 0.46667-0.44267-0.76951 0.89411-0.43595 0.06783
   1  -1  -822268.28 1109.28   1 0.62851-0.60462-0.77187 0.64720 0.09578-0.46427
   1  -1  -817191.77 1624.56   1 0.18273-0.15844 0.85613-0.98070-0.48337 0.11447
   1   1  -829952.99 1455.73   1 0.64969-0.62580-0.65503 0.77978-0.38577 0.01705
  -1  -1   7272049.8 2399.15   1 0.48826-0.51675 0.71166-0.83646 0.50509-0.18245
  -1   1   7263464.5 2467.84   1 0.73477-0.76370 0.67823-0.55346-0.00962 0.33231
   1   1  -7275024.1 2530.57   1 0.46339-0.43493-0.76778 0.89238-0.44246 0.12035
   1  -1  -7281863.4 2596.41   1 0.63529-0.60692-0.75522 0.63055 0.16134-0.48377
  -1   1   7278071.0 2452.16   1-0.15404 0.12496 0.96759-0.84295-0.20006 0.52327
   1   1  -7286699.2 2695.35   1 0.64853-0.62017-0.65731 0.78207-0.38384 0.06121
  -1  -1   6131430.3 3285.42   1 0.46028-0.49324 0.70394-0.82874 0.54091-0.26437
   1   1  -6129674.9 3228.18   1 0.64900-0.61602 0.72344-0.59862 0.23540-0.51201
   1   1  -6139593.011916.26   1 0.45519-0.42228-0.76335 0.88795-0.45834 0.18225
  -1  -1   6128641.2 3248.75   1 0.58558-0.61838-0.80110 0.67638-0.12381 0.40014
   1  -1  -6135808.6 3441.38   1 0.63951-0.60666-0.73114 0.60647 0.23757-0.51394
  -1   1   6141093.6 1357.94   1-0.07557 0.04210 0.95928-0.83463-0.27215 0.54918
   1  -1  -6121396.3 3031.38   1 0.22559-0.19218 0.82782-0.95234-0.51362 0.23687
   1   1  -6143988.8 1538.34   1 0.65004-0.61722-0.65433 0.77908-0.38637 0.10983
  -1  -1   6120773.9 3055.24   1 0.48973-0.52255-0.85706 0.73242-0.15998 0.43645
   1   1  -539960.12 1733.40   1 0.59660-0.55916 0.72752-0.60270 0.33877-0.56928
   1  -1  -534729.41 1554.31   1 0.76945-0.73168 0.55047-0.67523-0.32389 0.09330
   1   1  -545505.64 2006.96   1 0.43853-0.40115-0.75395 0.87859-0.48913 0.25912
  -1  -1   538215.16 1697.86   1 0.56609-0.60338-0.80195 0.67723-0.19077 0.42105
   1  -1  -535332.17 1586.08   1 0.63892-0.60164-0.69583 0.57116 0.32800-0.55837
  -1   1   545157.48 1966.15   1 0.01484-0.05242 0.93611-0.81153-0.35138 0.58194
   1  -1  -535985.33 1581.94   1 0.26412-0.22632 0.79905-0.92356-0.54014 0.30951
   1  -1  -4320664.5 2730.92   1 0.76913-0.72695 0.54578-0.67054-0.33248 0.14801
   1  -1  -4309279.1 2616.79   1 0.62981-0.58804-0.64165 0.51698 0.43773-0.62203
   1  -1  -4305960.0 2515.67   1 0.31774-0.27554 0.75381-0.87832-0.57515 0.39065
  -1  -1   4326973.0 2808.07   1 0.56688-0.60866-0.78132 0.65661-0.26110 0.44539
  -1  -1   3119495.7 2949.21   1 0.23551-0.28187 0.60653-0.73127 0.75937-0.62111
   1  -1  -3112177.1 2811.26   1 0.76790-0.72132 0.53297-0.65773-0.35532 0.21697
  -1  -1   3122190.3 3022.84   1 0.48097-0.52725-0.77667 0.65208-0.40673 0.54477
   1  -1  -3124497.6 3102.03   1 0.60375-0.55767-0.55715 0.43252 0.57013-0.70846
  -1   1   3114619.3 2849.06   1 0.55207-0.59812-0.43672 0.56137 0.71026-0.57192
  -1   1   3116767.5 2892.15   1 0.23883-0.28541 0.81827-0.69376-0.52285 0.66123
   1   1  -3121398.6 3079.81   1 0.67917-0.63293-0.58923 0.71398-0.43762 0.29935
  -1  -1   3118838.6 2990.02   1 0.60760-0.65386-0.72710 0.60239-0.31958 0.45780
  -1  -1   278475.67 1945.38   1 0.06758-0.11839 0.50312-0.62783 0.86156-0.76928
  -1   1   258386.02 2519.86   1 0.76858-0.81956 0.59491-0.47016-0.23526 0.32750
   1  -1  -271981.16 1816.76   1 0.76337-0.71238 0.50384-0.62863-0.40423 0.31198
  -1  -1   274587.89 1844.66   1 0.36421-0.41494-0.70447 0.57983-0.60914 0.70115
  -1   1   260856.28 2609.92   1 0.48278-0.53340-0.30467 0.42931 0.82103-0.72880
  -1   1   259894.21 2567.88   1 0.36747-0.41845 0.70592-0.58140-0.60550 0.69775
  -1  -1   259867.62 2594.86   1 0.64944-0.70016-0.65551 0.53076-0.38537 0.47755
   1  -1  -188195.13 2179.91   1 0.74486-0.68948 0.43450-0.55929-0.50633 0.46021
  -1  -1   190401.37 2212.38   1 0.07953-0.13470-0.44697 0.32255-0.89100 0.93691
  -1   1   171860.92 1788.17   1 0.35766-0.41285-0.10192 0.22660 0.92827-0.88215
  -1   1   172562.47 1815.37   1 0.49501-0.55036 0.55161-0.42700-0.67132 0.71746
  -1  -1   192833.38 2322.29   1 0.69059-0.74578-0.55840 0.43365-0.45962 0.50571
  -1   1   093812.46 2301.87   1 0.74445-0.80422 0.43326-0.30847-0.50800 0.50800
  -1  -1   0119750.7 2927.27   1 0.48550-0.54528-0.30950 0.18485 0.81761-0.81761
   1  -1   0109742.0 2710.32   1 0.65854-0.59886 0.23861-0.36330-0.71370 0.71370
   1   1   097799.29 2427.76   1 0.74213-0.68251-0.27819 0.40290-0.60978 0.60978
  -1  -1   0108838.7 2696.72   1 0.72584-0.78546-0.42361 0.29890-0.54194 0.54194
  -1   1  -1117157.5 2854.07   1-0.10235 0.03810 0.37551-0.25079 0.92114-0.96728
  -1   1  -1118483.9 2889.88   1 0.50009-0.56428 0.02424 0.10061-0.86563 0.81942
  -1  -1  -192021.96 2283.91   1 0.47519-0.53937-0.00618-0.11868-0.87985 0.83365
  -1   1  -1113535.9 2795.24   1-0.05706-0.00703-0.29421 0.41886-0.95403 0.90802
   1  -1   1100246.9 2486.15   1 0.71897-0.65489 0.02491-0.14960-0.69458 0.74076
   1   1   1122118.9 3004.83   1 0.72934-0.66528-0.03438 0.15908-0.68327 0.72944
  -1  -1  -2875209.6 6851.45   1 0.59215-0.66064 0.14642-0.27128-0.79240 0.69996
   1  -1   2917026.3 7171.09   1 0.74343-0.67497-0.18339 0.05869-0.64316 0.73549
   1   1   3916561.5 7226.21   1 0.72341-0.65048 0.37812-0.25333-0.57766 0.71602
  -1   1  -3958082.081553.33   1 0.21596-0.28894-0.58167 0.70625-0.78422 0.64631
   1   1   3878699.0 6895.45   1 0.63369-0.56048-0.65968 0.78434 0.40403-0.26581
   1  -1   4668805.1 5235.74   1 0.55602-0.47838 0.72462-0.84942 0.40712-0.22275
   1   1   4675679.0 5431.06   1 0.75213-0.67481 0.45768-0.33289-0.47415 0.65864
  -1   1  -4702620.0 5621.13   1 0.28750-0.36493-0.64473 0.76930-0.70827 0.52439
   1   1   4644553.0 5164.25   1 0.63807-0.56036-0.68750 0.81216 0.34670-0.16240
   1   1   4664589.0 5177.67   1 0.21123-0.13389 0.83779-0.71327-0.50347 0.68797
  -1   1  -4682109.9 5430.94   1 0.74411-0.82136-0.23951 0.36421-0.62364 0.43898
   1  -1   4675262.5 5377.32   1 0.70578-0.62823-0.51024 0.38549-0.49144 0.67580
   1  -1   532537.20 1421.99   1 0.59216-0.51007 0.72742-0.85224 0.34667-0.11616
  -1   1  -516928.87 1497.80   1 0.74859-0.83037 0.65906-0.53429-0.07231-0.15817
   1   1   516432.67 1504.40   1 0.76534-0.68363 0.51485-0.39006-0.38623 0.61683
  -1   1  -518800.40 1684.14   1 0.33365-0.41555-0.68139 0.80604-0.65143 0.42143
   1  -1   533235.83 1478.35   1 0.47287-0.39093-0.77269 0.64809-0.42348 0.65356
  -1  -1  -531022.04 1406.05   1 0.62040-0.70251-0.78330 0.65862 0.03928-0.26958
   1   1   517860.47 1573.43   1 0.00910 0.07280 0.93798-0.81340-0.34656 0.57712
  -1  -1  -531706.05 1368.80   1 0.45413-0.53584 0.60698-0.73160-0.65216 0.42146
  -1   1  -517878.78 1598.34   1 0.74012-0.82211-0.31199 0.43670-0.59571 0.36525
   1  -1   532617.52 1453.81   1 0.66437-0.58235-0.62434 0.49959-0.41085 0.64130
   1  -1   697741.86 2460.32   1 0.60795-0.52139 0.72748-0.85230 0.31804-0.04143
  -1   1  -690866.57 2290.42   1 0.75801-0.84419 0.63965-0.51488-0.12746-0.14911
   1   1   684547.35 2221.53   1 0.76980-0.68361 0.55730-0.43254-0.31115 0.58785
  -1   1  -689550.34 2311.34   1 0.36296-0.44932-0.70355 0.82820-0.61095 0.33494
  -1  -1  -6104193.3 2707.27   1 0.61107-0.69764-0.79144 0.66672-0.01409-0.26224
   1   1   685954.38 2146.83   1-0.14254 0.22863 0.96706-0.84241-0.21087 0.48791
  -1  -1  -692502.43 2293.08   1 0.37593-0.46205 0.69716-0.82167-0.61043 0.33368
  -1   1  -687242.90 2248.23   1 0.73522-0.82168-0.36203 0.48674-0.57304 0.29649
   1  -1   696217.81 2452.27   1 0.61747-0.53098-0.71192 0.58722-0.33448 0.61092
  -1   1  -7186952.8 1708.89   1 0.76348-0.85407 0.62252-0.49776-0.17190-0.15091
  -1   1  -7186695.0 1867.00   1 0.38176-0.47257-0.71706 0.84170-0.58316 0.26115
  -1  -1  -7193621.9 1685.27   1 0.32168-0.41219 0.75023-0.87475-0.57763 0.25476
  -1   1  -7186239.0 1777.52   1 0.73067-0.82162-0.39498 0.51968-0.55686 0.23422
   1  -1   8104284.1 2654.11   1 0.61497-0.51949 0.72725-0.85207 0.30480 0.06401
  -1   1  -8108479.5 2855.67   1 0.39354-0.48881-0.72522 0.84986-0.56495 0.19694
  -1  -1  -892250.90 2306.13   1 0.28634-0.38125 0.78106-0.90558-0.55492 0.18592
  -1   1  -8112913.5 2889.98   1 0.72735-0.82277-0.41516 0.53987-0.54643 0.17770
   1  -1   8103498.9 2646.30   1 0.51967-0.42424-0.83109 0.70639-0.19801 0.56659
  -1  -1  -8100927.6 2544.07   1 0.34239-0.43805-0.93949 0.81483 0.01099-0.37968
   1  -1   945433.74 2200.95   1 0.61248-0.51253 0.72735-0.85217 0.30954 0.10537
   1   1   939688.29 1997.60   1 0.75888-0.65948 0.63707-0.51231-0.13503 0.55009
  -1   1  -941654.62 2081.85   1 0.40045-0.50017-0.72989 0.85453-0.55397 0.13997
  -1  -1  -941457.75 1975.03   1 0.26535-0.36466 0.79808-0.92259-0.54097 0.12584
  -1   1  -939054.61 1938.22   1 0.72546-0.82535-0.42566 0.55037-0.54084 0.12602
  -1  -1  -946056.01 2227.10   1 0.40850-0.50852-0.91057 0.78593-0.06298-0.35171
   1  -1  1039464.43 1962.90   1 0.60767-0.50325 0.72749-0.85231 0.31857 0.14245
   1   1  1030026.75 1572.14   1 0.75138-0.64759 0.65408-0.52930-0.08716 0.54814
  -1   1 -1032484.00 1675.62   1 0.40383-0.50801-0.73214 0.85678-0.54852 0.08851
  -1  -1 -1044598.29 2287.46   1 0.57199-0.67648-0.80211 0.67738-0.17157-0.28897
  -1  -1 -1034139.56 1655.34   1 0.25511-0.35880 0.80605-0.93057-0.53403 0.07278
  -1   1 -1033598.94 1714.95   1 0.72490-0.82927-0.42861 0.55332-0.53925 0.07834
  -1  -1 -1040317.03 1969.27   1 0.46257-0.56707-0.87748 0.75284-0.12663-0.33414
   1  -1  1187387.57 2276.64   1 0.60112-0.49223 0.72755-0.85237 0.33062 0.17649
   1   1  1186084.77 2365.71   1 0.74243-0.63423 0.66856-0.54379-0.04249 0.54957
  -1   1 -1187848.95 2379.28   1 0.40456-0.51319-0.73263 0.85727-0.54733 0.04132
  -1  -1 -1193283.35 2563.24   1 0.56192-0.67090-0.80166 0.67694-0.20388-0.30272
  -1   1 -1182316.50 2193.42   1 0.72548-0.83432-0.42551 0.55022-0.54092 0.03392
  -1  -1 -1186730.95 2235.62   1 0.50766-0.61664-0.84198 0.71734-0.18256-0.32429
   1  -1  1229678.40 2667.10   1 0.59316-0.47982 0.72745-0.85227 0.34491 0.20832
   1   1  1234844.71 3184.23   1 0.73250-0.61990 0.68076-0.55598-0.00053 0.55371
  -1   1 -1235602.14 3226.72   1 0.40323-0.51632-0.73174 0.85639-0.54949-0.00251
  -1  -1 -1229775.81 2734.75   1 0.55166-0.66511-0.80037 0.67565-0.23467-0.31799
  -1  -1 -1225478.38 2256.21   1 0.25714-0.36962 0.80448-0.92900-0.53541-0.01808
  -1   1 -1234369.10 3080.37   1 0.72696-0.84027-0.41738 0.54209-0.54526-0.00783
  -1  -1 -1231818.82 2841.40   1 0.54580-0.65911-0.80504 0.68033-0.23238-0.32048
   1  -1  1314309.92 1634.48   1 0.58415-0.46629 0.72708-0.85188 0.36070 0.23847
   1   1  1316603.14 1908.36   1 0.72172-0.60472 0.69106-0.56628 0.03924 0.56002
  -1   1 -1316438.82 1924.85   1 0.40024-0.51778-0.72975 0.85439-0.55431-0.04369
  -1  -1 -1314774.82 1748.91   1 0.54089-0.65849-0.79871 0.67411-0.26360-0.33458
  -1   1 -1315770.64 1764.62   1 0.72908-0.84687-0.40495 0.52966-0.55175-0.04742
  -1  -1 -1313443.62 1504.68   1 0.57927-0.69706-0.76609 0.64139-0.27844-0.32049
   1  -1  14115808.5 6847.92   1 0.57396-0.45163 0.72642-0.85122 0.37798 0.26729
   1   1  14129289.513668.74   1 0.71018-0.58878 0.69975-0.57497 0.07727 0.56809
  -1   1 -14136762.614459.04   1 0.39587-0.51786-0.72680 0.85145-0.56127-0.08273
  -1  -1 -14129282.2 7694.64   1 0.53018-0.65223-0.79593 0.67134-0.29222-0.35198
  -1   1 -14137028.814460.40   1 0.73162-0.85388-0.38871 0.51342-0.56002-0.08525
  -1  -1 -14116636.5 6845.49   1 0.60873-0.73099-0.72540 0.60070-0.32127-0.32373
   1  -1  15 5487.23  777.93   1 0.56280-0.43599 0.72540-0.85019 0.39629 0.29507
   1   1  15 3393.50  813.87   1 0.69830-0.57156 0.70681-0.58199 0.11309 0.57844
  -1   1 -15 1429.85  527.36   1 0.39033-0.51677-0.72302 0.84766-0.56998-0.12002
  -1  -1 -15 6645.77  922.73   1 0.51917-0.64568-0.79248 0.66788-0.32005-0.37016
  -1   1 -15 1569.64  363.02   1 0.73435-0.86108-0.36897 0.49368-0.56972-0.12164
  -1  -1 -15 3776.32  495.96   1 0.63486-0.76159-0.68276 0.55806-0.36162-0.32946
   1  -1  1617978.70 1404.97   1 0.55071-0.41944 0.72395-0.84875 0.41545 0.32200
   1   1  1610918.03  993.28   1 0.68537-0.55417 0.71288-0.58806 0.14850 0.58913
  -1   1 -1613380.69 1108.34   1 0.38375-0.51465-0.71846 0.84310-0.58012-0.15588
  -1  -1 -1618518.12 1529.53   1 0.50784-0.63881-0.78836 0.66377-0.34723-0.38900
  -1   1 -1612230.41  941.99   1 0.73705-0.86826-0.34593 0.47064-0.58058-0.15687
   1  -1  17 4711.97  851.27   1 0.53774-0.40200 0.72203-0.84683 0.43531 0.34823
   1   1  17 3339.71  723.25   1 0.67176-0.53609 0.71781-0.59299 0.18294 0.60079
  -1   1 -17 5205.60 1040.45   1 0.37626-0.51161-0.71317 0.83781-0.59144-0.19056
  -1  -1 -17 4834.82  950.60   1 0.49618-0.63160-0.78360 0.65900-0.37385-0.40838
  -1   1 -17 4506.75  803.74   1 0.73952-0.87520-0.31966 0.44437-0.59238-0.19116
   1  -1  18  831.42  482.98   1 0.52389-0.38368 0.71959-0.84439 0.45576 0.37387
   1   1  18  667.02  403.12   1 0.65746-0.51733 0.72169-0.59687 0.21656 0.61328
  -1   1 -18  189.80  402.14   1 0.36792-0.50773-0.70717 0.83181-0.60376-0.22424
  -1  -1 -18 1781.28  528.85   1 0.48415-0.62403-0.77818 0.65359-0.40002-0.42824
   1  -1  19 8103.09  753.11   1 0.50915-0.36447 0.71659-0.84139 0.47671 0.39901
   1   1  19 6716.79  679.19   1 0.64246-0.49786 0.72456-0.59974 0.24949 0.62645
  -1   1 -1910239.09  995.81   1 0.35879-0.50305-0.70048 0.82512-0.61691-0.25709
  -1  -1 -19 9884.39  997.06   1 0.47174-0.61608-0.77212 0.64752-0.42577-0.44850
  -1  -2  19 8219.35 1129.19   1 0.35843-0.33332 0.66670-0.91626 0.65347 0.22215
  -1   2  19 5068.47  992.00   1 0.64268-0.61762 0.72453-0.47488 0.24903 0.62691
   1   2 -19 8283.51 1097.52   1 0.31728-0.34226-0.66848 0.91777-0.67264-0.20136
   1  -2 -19 8085.31 1142.57   1 0.54191-0.56694-0.79894 0.54975-0.26080-0.61347
   1   2 -19 6460.92  905.16   1 0.73879-0.76418-0.32815 0.57757-0.58863-0.28709
  -1  -2  1812850.78 1182.91   1 0.36688-0.34624 0.67027-0.91983 0.64508 0.18445
  -1   2  1812127.19 1370.00   1 0.65627-0.63568 0.72196-0.47231 0.21925 0.61059
   1   2 -18 9920.65  997.01   1 0.32488-0.34541-0.67453 0.92381-0.66291-0.16509
   1  -2 -1814773.42 1591.05   1 0.55484-0.57580-0.80085 0.55141-0.22534-0.60364
   1   2 -1812026.29 1122.98   1 0.73627-0.75719-0.35305 0.60247-0.57728-0.25236
  -1  -2  17 1288.64  503.08   1 0.37357-0.35740 0.67304-0.92260 0.63832 0.14513
  -1   2  17 1495.16  669.69   1 0.66920-0.65308 0.71860-0.46895 0.18913 0.59461
   1   2 -17 3140.78  767.51   1 0.33142-0.34750-0.67966 0.92895-0.65437-0.12763
   1  -2 -17 1635.26  594.74   1 0.56702-0.58351-0.80200 0.55255-0.18780-0.59513
   1   2 -17 3039.07  769.38   1 0.73349-0.74994-0.37548 0.62490-0.56656-0.21698
  -1  -2  1640460.91 2818.29   1 0.37834-0.36663 0.67498-0.92454 0.63344 0.10392
  -1   2  1634014.93 2444.31   1 0.68149-0.66983 0.71443-0.46478 0.15859 0.57904
   1   2 -1639985.03 2842.90   1 0.33680-0.34842-0.68384 0.93312-0.64724-0.08876
   1  -2 -1642249.28 3020.16   1 0.57868-0.59068-0.80187 0.55243-0.14874-0.58814
   1   2 -1639805.23 2817.30   1 0.73060-0.74257-0.39546 0.64488-0.55661-0.18084
   1  -2 -1642529.63 2931.71   1 0.45738-0.46935-0.88108 0.63179-0.12037-0.61687
  -1  -2  1518268.07 1412.87   1 0.38092-0.37368 0.67602-0.92558 0.63078 0.06049
  -1   2  1522754.00 1801.77   1 0.69315-0.68595 0.70941-0.45977 0.12755 0.56398
   1   2 -1524664.35 1878.70   1 0.34085-0.34801-0.68696 0.93624-0.64179-0.04821
   1  -2 -1518268.18 1529.82   1 0.58975-0.59728-0.80033 0.55088-0.10792-0.58289
   1   2 -1524151.46 1857.51   1 0.72773-0.73523-0.41296 0.66238-0.54758-0.14378
   1  -2 -1519156.22 1469.82   1 0.41231-0.41981-0.90854 0.65925-0.06736-0.62380
  -1  -2  1426583.86 1711.16   1 0.38098-0.37821 0.67604-0.92560 0.63072 0.01447
  -1   2  1427819.72 1914.28   1 0.70381-0.70191 0.70376-0.45421 0.09673 0.54863
   1   2 -1426571.83 1794.09   1 0.34338-0.34609-0.68889 0.93818-0.63836-0.00564
   1  -2 -1425932.31 1801.48   1 0.60020-0.60325-0.79719 0.54774-0.06506-0.57970
   1   2 -1424275.59 1600.50   1 0.72504-0.72806-0.42790 0.67732-0.53964-0.10563
   1  -2 -1427830.74 1768.19   1 0.36357-0.36659-0.93148 0.68219-0.01246-0.63263
  -1  -2  1343053.05 2039.65   1 0.37807-0.37976 0.67487-0.92443 0.63372-0.03461
  -1   2  1348200.77 2397.50   1 0.71424-0.71674 0.69693-0.44737 0.06436 0.53490
   1   2 -1343206.87 2121.57   1 0.34411-0.34237-0.68945 0.93873-0.63736 0.03935
   1  -2 -1347015.50 2386.02   1 0.60994-0.60850-0.79219 0.54275-0.01980-0.57891
   1   2 -1349551.81 2384.33   1 0.72265-0.72120-0.44013 0.68955-0.53296-0.06622
   1  -2 -1342710.17 2035.43   1 0.31130-0.30999-0.94927 0.69996 0.04427-0.64339
  -1  -2  1265478.27 2359.90   1 0.37158-0.37774 0.67222-0.92178 0.64034-0.08731
  -1   2  1249879.36 2022.38   1 0.72403-0.73094 0.68905-0.43950 0.03110 0.52206
   1   2 -1247923.99 1835.40   1 0.34266-0.33647-0.68835 0.93763-0.63933 0.08732
   1  -2 -1268534.76 2600.76   1 0.61857-0.61260-0.78521 0.53586 0.02825-0.58099
   1   2 -1255689.32 2124.07   1 0.72072-0.71480-0.44945 0.69886-0.52777-0.02532
  -1  -2  1123834.99 1983.17   1 0.36068-0.37131 0.66766-0.91722 0.65125-0.14431
  -1   2  1120220.08 1759.88   1 0.73318-0.74449 0.68002-0.43046-0.00323 0.51031
   1   2 -1119662.44 1686.58   1 0.33851-0.32786-0.68516 0.93445-0.64494 0.13893
   1  -2 -1126515.36 2452.99   1 0.62641-0.61597-0.77539 0.52605 0.07970-0.58638
   1   2 -1123192.14 2032.09   1 0.71941-0.70901-0.45556 0.70498-0.52431 0.01730
  -1  -2  1027573.81 2117.32   1 0.34425-0.35934 0.66054-0.91010 0.66721-0.20635
  -1   2  1022844.81 1838.27   1 0.74164-0.75736 0.66965-0.42010-0.03893 0.49991
   1   2 -1021278.16 1679.08   1 0.33092-0.31582-0.67927 0.92855-0.65503 0.19503
   1  -2 -1023862.37 1905.46   1 0.63292-0.61800-0.76232 0.51297 0.13514-0.59576
  -1   2  1022299.33 1720.08   1-0.12489 0.10896 0.96578-0.71649-0.22731 0.68903
   1   2 -1024583.05 1957.43   1 0.71885-0.70397-0.45809 0.70751-0.52287 0.06195
  -1  -2   960902.19 2920.81   1 0.32075-0.34031 0.64985-0.89941 0.68905-0.27428
  -1   2   950653.89 2554.28   1 0.74936-0.76948 0.65774-0.40818-0.07631 0.49119
   1   2  -949137.95 2413.29   1 0.31881-0.29925-0.66971 0.91899-0.67070 0.25669
   1  -2  -959952.18 2954.44   1 0.63767-0.61826-0.74513 0.49578 0.19531-0.60987
  -1   2   948040.21 2368.34   1-0.05279 0.03248 0.95485-0.70556-0.29235 0.70790
   1   2  -953351.86 2704.72   1 0.71920-0.69985-0.45650 0.70592-0.52377 0.10895
  -1  -2   828811.15 2499.06   1 0.28812-0.31215 0.63408-0.88364 0.71757-0.34889
  -1   2   838279.98 1987.34   1 0.75624-0.78076 0.64395-0.39439-0.11582 0.48461
   1   2  -836583.83 1905.98   1 0.30009-0.27601-0.65520 0.90435-0.69329 0.32551
   1  -2  -828801.19 2569.75   1 0.63979-0.61598-0.72289 0.47357 0.26091-0.62951
  -1   2   833651.63 1691.95   1 0.02413-0.04841 0.93296-0.68380-0.35915 0.72805
   1   2  -839461.08 2008.16   1 0.72058-0.69676-0.45011 0.69953-0.52739 0.15866
  -1  -2   776026.33 1959.50   1 0.24381-0.27231 0.61104-0.86053 0.75311-0.43049
   1   2  -773547.17 1951.23   1 0.27350-0.24497-0.63285 0.88200-0.72435 0.40255
   1  -2  -776703.72 2080.15   1 0.63871-0.61041-0.69351 0.44418 0.33329-0.65581
  -1   2   767613.10 1755.70   1 0.10621-0.13493 0.89873-0.64957-0.42544 0.74822
   1   2  -774279.24 2071.26   1 0.72308-0.69478-0.43799 0.68741-0.53414 0.21150
  -1  -2   6311624.1 2685.58   1 0.48736-0.52028-0.77968 0.53049-0.39315 0.66924
  -1   2   6303122.9 2589.75   1 0.19202-0.22517 0.85022-0.60106-0.49014 0.76681
   1   2  -5105204.1 2621.76   1 0.43522-0.39779 0.69600-0.44644 0.57109-0.80152
  -1  -2   5115372.3 2893.34   1 0.43693-0.47431-0.75300 0.50372-0.49200 0.72200
  -1   2   5106017.3 2676.24   1 0.27974-0.31754 0.78652-0.53749-0.55057 0.78119
   1   2  -5111670.2 2903.64   1 0.73122-0.69397-0.39143 0.64084-0.55865 0.32820
  -1  -2   4128022.4 3178.41   1 0.00620-0.04804 0.45959-0.70902 0.88810-0.70354
   1   2  -4109327.7 2716.25   1 0.32203-0.28013 0.65045-0.40089 0.68790-0.87224
  -1   2   4113021.8 2881.43   1 0.76979-0.81197 0.55704-0.30753-0.31163 0.49610
   1  -2  -499712.15 2523.71   1 0.71730-0.67503 0.36408-0.61369-0.59406 0.40952
   1   2  -4118251.7 2979.30   1 0.10050-0.05858-0.46886 0.71770-0.87753 0.69387
  -1  -2   4123875.4 3083.38   1 0.36563-0.40746-0.70551 0.45623-0.60708 0.79109
   1  -2  -4123101.5 3117.90   1 0.59644-0.55492-0.53782 0.28856 0.59581-0.78024
  -1   2   4119561.1 3000.17   1 0.36663-0.40882 0.70678-0.45775-0.60500 0.78950
   1  -2  -4117806.2 2950.81   1 0.57613-0.53392 0.42012-0.66942-0.70112 0.51652
   1   2  -4122400.3 3159.34   1 0.73623-0.69451-0.35341 0.60283-0.57711 0.39274
  -1  -2   333188.01 1445.47   1-0.11366 0.06733 0.36621-0.61564 0.92356-0.78514
   1   2  -331916.53 1396.32   1 0.18131-0.13494 0.57557-0.32609 0.79739-0.93565
  -1   2   329206.15 1342.52   1 0.76614-0.81275 0.51996-0.27037-0.37770 0.51606
   1  -2  -330418.50 1354.80   1 0.69598-0.64934 0.31918-0.56879-0.64321 0.50480
   1   2  -330487.89 1367.08   1-0.00927 0.05561-0.34992 0.59876-0.93673 0.79899
  -1  -2   331188.79 1362.46   1 0.26264-0.30895-0.62349 0.37433-0.73639 0.87430
   1  -2  -331123.63 1400.92   1 0.55863-0.51257-0.45053 0.20123 0.69638-0.83472
  -1   2   331725.49 1404.21   1 0.44065-0.48669-0.23238 0.48174 0.86707-0.72873
   1  -2  -325863.26 1155.95   1 0.61518-0.56858 0.34200-0.59130-0.71033 0.57189
   1   2  -330769.89 1425.81   1 0.74079-0.69459-0.30241 0.55183-0.59980 0.46152
  -1  -2   329072.83 1342.25   1 0.69258-0.73882-0.55263 0.30313-0.46359 0.60186
  -1  -2   2140228.7 1248.17   1-0.24614 0.19534 0.24923-0.49860 0.93663-0.84452
   1   2  -2136147.0 3356.61   1 0.01981 0.03099 0.46949-0.22006 0.88271-0.97499
  -1   2   2134976.5 3368.63   1 0.75558-0.80657 0.47004-0.22046-0.45623 0.54847
   1  -2  -2135282.8 3362.42   1 0.65825-0.60724 0.24996-0.49957-0.71008 0.61780
   1   2  -2133881.1 3298.59   1-0.14981 0.20056-0.18147 0.43076-0.97191 0.87989
  -1  -2   2137963.5 3395.79   1 0.12095-0.17170-0.48981 0.24098-0.86339 0.95521
   1  -2  -2137655.8 3429.29   1 0.50197-0.45134-0.33922 0.08993 0.79557-0.88780
  -1   2   2136800.7 3396.89   1 0.36907-0.41968-0.11913 0.36848 0.92173-0.82950
  -1   2   2144949.2 1378.21   1 0.52460-0.57556 0.50733-0.25810-0.68367 0.77595
   1   2  -2138517.311826.10   1 0.74414-0.69327-0.23613 0.48554-0.62488 0.53255
  -1   2   1479166.9 3861.77   1 0.73217-0.78755 0.39959-0.15001-0.55158 0.59770
  -1  -2   1516983.5 4065.35   1-0.05285-0.00234-0.29914 0.04984-0.95274 0.99875
  -1   2   1492391.4 4021.17   1 0.58872-0.64408 0.39623-0.14693-0.70456 0.75071
   1   2  -1499275.7 4118.44   1 0.74182-0.68655-0.15026 0.39966-0.65353 0.60737
   1   2   097991.85 2441.69   1-0.29489 0.35462 0.20247 0.04689 0.93383-0.93383
  -1   2   097407.94 2425.72   1 0.68380-0.74357 0.29568-0.04607-0.66706 0.66706
   1   2   093853.42 2367.02   1 0.49200-0.43222 0.01424 0.23548-0.87047 0.87047
   1   2   089906.68 2228.95   1 0.23134-0.17161 0.07642 0.17293 0.96986-0.96986
  -1   2   0101047.1 2560.29   1 0.63993-0.69968 0.28518-0.03587-0.71355 0.71355
   1   2   096467.71 2450.70   1 0.73063-0.67096-0.04295 0.29235-0.68142 0.68142
  -1   2  -132211.66 1383.65   1-0.24971 0.18551 0.24588 0.00348 0.93657-0.98263
  -1   2  -132167.08 1399.42   1 0.58850-0.65263 0.14115 0.10856-0.79607 0.74985
   1  -2   141959.53 1811.70   1-0.03432 0.09843-0.32066 0.07137-0.94656 0.99258
  -1  -2  -144657.48 1932.16   1 0.54016-0.60452-0.41236 0.16306 0.73360-0.77972
   1   2   130592.33 1335.11   1 0.37583-0.31149-0.12943 0.37878 0.91760-0.87148
   1  -2   143046.43 1902.72   1 0.73471-0.67065-0.07331-0.17608-0.67440 0.72057
  -1  -2  -139266.91 1719.43   1 0.74409-0.80815-0.21100-0.03840-0.63387 0.58770
  -1   2  -2119154.6 2922.73   1 0.04299-0.11171 0.48603-0.23660 0.87288-0.96516
  -1  -2  -2121356.5 3030.74   1 0.50497-0.57345 0.02947-0.27919-0.86263 0.77019
  -1   2  -2122687.8 3017.08   1 0.42310-0.49169-0.06676 0.31649-0.90361 0.81121
  -1   2  -2113824.2 2862.16   1-0.10666 0.03811-0.23490 0.48420-0.96614 0.87412
   1  -2   2120133.0 2988.76   1 0.08642-0.01800-0.45421 0.20537-0.88669 0.97851
  -1  -2  -2130270.2 3240.31   1 0.59605-0.66492-0.53681 0.28755 0.59711-0.68933
   1   2   2119361.7 2961.26   1 0.47307-0.40414-0.28764 0.53694 0.83274-0.74051
   1   2   2113506.6 2834.85   1 0.66017-0.59170 0.23420 0.01517-0.71366 0.80601
  -1  -2  -2116065.2 2901.20   1 0.73844-0.80690-0.10744-0.14196-0.66570 0.57337
   1  -2   3190284.9 1578.46   1-0.20874 0.28187 0.28365-0.53302 0.93593-0.79776
  -1   2  -3185361.9 1511.50   1 0.32034-0.39350 0.64966-0.40010 0.68943-0.82768
   1   2   3193958.7 1849.93   1 0.69832-0.62544 0.32386-0.07425-0.63831 0.77672
   1  -2   3182516.9 1649.40   1 0.19446-0.12148-0.56163 0.31248-0.80420 0.94212
   1   2   3177607.8 1571.30   1 0.53280-0.45929-0.39773 0.64702 0.74694-0.60860
   1   2   3193553.9 1708.40   1 0.59059-0.51768 0.39258-0.14327-0.70503 0.84348
  -1  -2  -3187118.1 1659.77   1 0.72404-0.79690-0.00228-0.24711-0.68974 0.55125
  -1   2  -3192865.8 1800.24   1 0.72333-0.79619 0.00166 0.24773-0.69049 0.55199
   1  -2   4 4466.69  412.21   1-0.00175 0.07943 0.45374-0.70316 0.89113-0.70657
  -1   2  -4 6927.47  623.08   1 0.50795-0.58559 0.71633-0.46673 0.47838-0.66274
   1  -2   4 3738.13  544.85   1 0.28409-0.20666-0.64186 0.39270-0.71225 0.89614
  -1  -2  -4 4309.85  468.78   1 0.63663-0.71433-0.67668 0.42736 0.36985-0.55414
   1   2   4 6181.82  579.24   1 0.56851-0.49052-0.47159 0.72085 0.67408-0.48965
   1   2   4 8009.72  754.00   1 0.49713-0.41981 0.54857-0.29934-0.67225 0.85682
  -1  -2  -4 4158.14  411.90   1 0.70191-0.77916 0.09982-0.34920-0.70522 0.52053
  -1   2  -4 7277.29  715.15   1 0.73403-0.81129-0.06789 0.31730-0.67570 0.49104
   1  -2   4 4812.05  557.22   1 0.73131-0.65379-0.39079 0.14137-0.55897 0.74334
  -1   2  -5358019.2 2877.05   1 0.61581-0.69791 0.72721-0.47757 0.30319-0.53370
   1   2   5369782.4 3025.74   1 0.38491-0.30320 0.68805-0.43883-0.61515 0.84586
  -1   2  -5386998.3 3352.13   1 0.73997-0.82162-0.12461 0.37401-0.66099 0.43016
   1  -2   6242336.9 2029.12   1 0.25841-0.17186 0.61884-0.86832 0.74179-0.46526
  -1   2  -6258947.6 2163.04   1 0.67705-0.76361 0.71606-0.46641 0.16987-0.44649
   1   2   6265782.0 2532.80   1 0.76151-0.67542 0.49469-0.24510-0.41877 0.69549
  -1  -2  -6257652.0 2407.16   1 0.63821-0.72481-0.74199 0.49264 0.20523-0.48160
   1   2   6259876.3 2188.31   1 0.26155-0.17543 0.80106-0.55203-0.53840 0.81515
   1  -2   710095.64  918.48   1 0.32700-0.23597 0.65275-0.90231 0.68336-0.36076
  -1   2  -7 8362.74  762.58   1 0.71274-0.80332 0.69800-0.44844 0.06918-0.39187
   1   2   7 6016.38  692.61   1 0.76783-0.67724 0.53236-0.28285-0.35639 0.67921
  -1   2  -7 9879.87 1318.09   1 0.21739-0.30816-0.58299 0.83215-0.78284 0.46104
  -1  -2  -7 8572.79  880.13   1 0.63333-0.72441-0.76123 0.51188 0.13930-0.46173
   1   2   7 7784.12  736.74   1 0.13752-0.04675 0.88257-0.63341-0.44960 0.77239
  -1  -2  -7 5262.46  503.42   1 0.61276-0.70320 0.34722-0.59652-0.70990 0.38685
  -1   2  -7 6792.31  699.65   1 0.74399-0.83443-0.20412 0.45353-0.63624 0.31308
   1  -2   832281.42 1567.51   1 0.37196-0.27647 0.67238-0.92194 0.63995-0.27126
  -1   2  -834308.08 1659.84   1 0.73534-0.83032 0.67758-0.42803-0.01193-0.35685
   1   2   836136.20 1869.78   1 0.76998-0.67499 0.56390-0.31439-0.29854 0.66749
  -1   2  -836357.43 1981.85   1 0.24463-0.33984-0.60764 0.85679-0.75559 0.38781
  -1  -2  -831710.78 1648.03   1 0.62659-0.72215-0.77512 0.52577 0.08101-0.44950
   1   2   833987.33 1748.90   1 0.01958 0.07561 0.93452-0.68536-0.35536 0.72426
  -1  -2  -828403.86 2448.87   1 0.58502-0.67985 0.40336-0.65266-0.70359 0.33439
  -1   2  -837433.69 1890.03   1 0.74418-0.83902-0.22966 0.47906-0.62725 0.25792
   1  -2   921948.69 1913.65   1 0.40122-0.30125 0.68392-0.93348 0.60931-0.19454
   1   2   917342.32 1621.18   1 0.76903-0.66963 0.59050-0.34099-0.24471 0.65977
  -1   2  -919713.09 2269.81   1 0.26468-0.36433-0.62525 0.87440-0.73416 0.32041
  -1  -2  -921135.70 1928.78   1 0.61863-0.71867-0.78515 0.53580 0.02863-0.44319
   1   2   916369.06 1594.30   1-0.08762 0.18686 0.96126-0.71197-0.26133 0.67688
  -1  -2  -918428.88 1602.21   1 0.56137-0.66059 0.44676-0.69606-0.69660 0.28125
  -1   2  -917143.82 1554.02   1 0.74310-0.84299-0.24704 0.49646-0.62190 0.20708
   1  -2  1013803.61 1089.42   1 0.41985-0.31542 0.69073-0.94029 0.58873-0.12787
   1   2  1021837.67 1768.74   1 0.76569-0.66190 0.61314-0.36363-0.19430 0.65548
  -1   2 -1023355.38 2624.24   1 0.27913-0.38323-0.63766 0.88681-0.71796 0.25824
  -1  -2 -1015630.04 1363.34   1 0.61008-0.71457-0.79210 0.54265-0.01908-0.44147
  -1  -2 -1013313.26 1027.71   1 0.54259-0.64619 0.47880-0.72810-0.69017 0.22867
  -1   2 -1021398.61 1716.39   1 0.74285-0.84722-0.25817 0.50758-0.61766 0.15675
   1  -2  11237820.7 8127.67   1 0.43105-0.32215 0.69460-0.94416 0.57594-0.06900
   1   2  11255109.827266.85   1 0.76047-0.65227 0.63255-0.38304-0.14677 0.65406
  -1   2 -11234521.7 8095.83   1 0.28919-0.39773-0.64614 0.89529-0.70630 0.20061
  -1  -2 -11255327.527287.27   1 0.60063-0.70961-0.79701 0.54757-0.06319-0.44341
  -1  -2 -11200419.5 6828.48   1 0.52840-0.63646 0.50135-0.75057-0.68515 0.17759
  -1   2 -11261479.727927.41   1 0.74269-0.85153-0.26350 0.51292-0.61560 0.10859
   1  -2  1225038.68  920.35   1 0.43682-0.32346 0.69654-0.94610 0.56921-0.01619
   1   2  1227939.82 1236.71   1 0.75397-0.64137 0.64895-0.39940-0.10189 0.65507
  -1   2 -1228907.81 2160.21   1 0.29574-0.40873-0.65160 0.90075-0.69853 0.14686
  -1  -2 -1226331.89 1158.12   1 0.59066-0.70412-0.80013 0.55068-0.10438-0.44827
  -1   2 -1228563.81 1121.32   1 0.74268-0.85600-0.26377 0.51318-0.61549 0.06240
  -1  -2 -1224366.00  901.90   1 0.34543-0.45906-0.93840 0.68909 0.00768-0.56072
   1  -2  1333131.65 1590.38   1 0.43850-0.32067 0.69709-0.94665 0.56725 0.03186
   1   2  1336334.46 1920.94   1 0.74591-0.62891 0.66343-0.41387-0.05888 0.65815
  -1   2 -1335701.17 2290.18   1 0.29945-0.41689-0.65467 0.90382-0.69406 0.09643
  -1  -2 -1331408.42 1672.35   1 0.58025-0.69818-0.80175 0.55230-0.14319-0.45551
  -1   2 -1339806.09 1952.88   1 0.74281-0.86060-0.25953 0.50895-0.61714 0.01795
  -1  -2 -1329263.58 1396.42   1 0.41054-0.52848-0.90949 0.66021-0.06532-0.53369
   1  -2  14 3701.13  511.87   1 0.43696-0.31466 0.69658-0.94614 0.56906 0.07613
   1   2  14 4347.62  781.45   1 0.73672-0.61531 0.67596-0.42640-0.01762 0.66299
  -1   2 -14 4418.57  708.32   1 0.30082-0.42270-0.65579 0.90495-0.69241 0.04880
  -1  -2 -14 4945.15  738.21   1 0.56941-0.69183-0.80208 0.55263-0.18006-0.46471
  -1   2 -14 4703.32  623.15   1 0.74302-0.86528-0.25123 0.50065-0.62031-0.02495
  -1  -2 -14 3038.99  427.13   1 0.46842-0.59084-0.87332 0.62403-0.13373-0.51135
   1  -2  15 1823.19  431.21   1 0.43280-0.30603 0.69519-0.94475 0.57391 0.11736
   1   2  15 2022.81  538.55   1 0.72651-0.60070 0.68679-0.43723 0.02215 0.66930
  -1   2 -15 4061.57  671.57   1 0.30022-0.42655-0.65530 0.90445-0.69314 0.00356
  -1  -2 -15 1646.24  713.52   1 0.55819-0.68509-0.80128 0.55184-0.21530-0.47552
  -1   2 -15 2754.80  509.63   1 0.74411-0.86973-0.23929 0.48870-0.62372-0.06875
   1  -2  1632228.25 2540.24   1 0.42644-0.29520 0.69303-0.94259 0.58125 0.15611
   1   2  1635243.10 2856.96   1 0.71537-0.58516 0.69610-0.44654 0.06067 0.67689
  -1   2 -1634108.85 3248.00   1 0.29793-0.42871-0.65341 0.90257-0.69590-0.03965
  -1  -2 -1633656.56 2766.40   1 0.54658-0.67796-0.79946 0.55002-0.24919-0.48769
  -1   2 -1633519.35 2641.02   1 0.74418-0.87420-0.22369 0.47310-0.62939-0.10924
   1  -2  1717168.53 1124.95   1 0.41817-0.28247 0.69013-0.93969 0.59063 0.19282
   1   2  1716479.37 1332.38   1 0.70335-0.56873 0.70403-0.45448 0.09810 0.68555
  -1   2 -1716929.80 2751.22   1 0.29418-0.42940-0.65030 0.89946-0.70039-0.08112
  -1   2 -1717249.51 1101.75   1 0.74400-0.87841-0.20473 0.45414-0.63603-0.14877
   1  -2  18 6505.79  905.89   1 0.40819-0.26803 0.68652-0.93608 0.60171 0.22782
   1   2  18 5573.46  931.40   1 0.69083-0.55070 0.71050-0.46086 0.13390 0.69594
  -1   2 -18 6436.92 1214.69   1 0.28912-0.42879-0.64609 0.89524-0.70637-0.12111
   1  -2  19 6303.68  895.63   1 0.39665-0.25202 0.68218-0.93174 0.61423 0.26139
   1   2  19 4087.30  969.98   1 0.67714-0.53254 0.71602-0.46638 0.16963 0.70631
  -1   2 -19 6771.30 1344.30   1 0.28290-0.42701-0.64085 0.89000-0.71363-0.15983
  -1  -3  1812697.89 1772.53   1 0.22738-0.20678 0.60205-0.97627 0.76539 0.06418
  -1   3  1811698.44 1527.84   1 0.68084-0.66024 0.71467-0.34021 0.16027 0.66957
   1   3 -1814683.28 2163.77   1 0.22855-0.24893-0.59319 0.96692-0.77193-0.05556
   1  -3 -1814516.64 1890.39   1 0.57778-0.59875-0.80193 0.42776-0.15186-0.67713
   1   3 -1814556.11 1751.89   1 0.74413-0.76361-0.23760 0.61171-0.62434-0.20662
  -1  -3  17 4362.58 1280.32   1 0.22864-0.21250 0.60275-0.97697 0.76446 0.01902
  -1   3  17 4003.21  989.52   1 0.69290-0.67678 0.70953-0.33506 0.12822 0.65551
   1   3 -17 6319.93 1510.76   1 0.23084-0.24678-0.59527 0.96899-0.76965-0.01187
   1   3 -17 8678.34 1038.69   1 0.74292-0.75937-0.25531 0.62944-0.61876-0.16478
  -1  -3  1610949.54 1227.57   1 0.22708-0.21541 0.60189-0.97611 0.76560-0.02820
  -1   3  1614142.57 1264.59   1 0.70389-0.69319 0.70371-0.32938 0.09648 0.64108
   1   3 -1614961.93 1299.42   1 0.23137-0.24286-0.59575 0.96947-0.76911 0.03356
   1   3 -1613698.65 1221.49   1 0.74246-0.75443-0.27033 0.64445-0.61292-0.12453
  -1  -3  1529527.65 2121.40   1 0.22236-0.21515 0.59925-0.97348 0.76905-0.07774
  -1   3  1533308.29 2416.89   1 0.71453-0.70823 0.69671-0.32238 0.06340 0.62806
   1   3 -1529658.18 3570.05   1 0.22990-0.23694-0.59441 0.96814-0.77059 0.08101
   1   3 -1534520.21 2517.50   1 0.74192-0.74942-0.28269 0.65681-0.60797-0.08339
   1  -3 -1531428.99 2228.15   1 0.29022-0.29790-0.95465 0.58067 0.06638-0.75767
  -1  -3  14  568.37  241.39   1 0.21399-0.21124 0.59454-0.96877 0.77506-0.12983
  -1   3  14 1127.68  478.92   1 0.72444-0.72254 0.68869-0.31436 0.02965 0.61571
   1   3 -14 1332.38  419.24   1 0.22608-0.22868-0.59094 0.96467-0.77437 0.13077
   1  -3 -14  999.76  750.71   1 0.61754-0.62053-0.78622 0.41219 0.02224-0.66710
   1   3 -14 1289.47  453.89   1 0.74142-0.74444-0.29228 0.66641-0.60403-0.04123
  -1  -3  1316556.67 1999.21   1 0.20140-0.20312 0.58734-0.96156 0.78387-0.18473
  -1   3  1320193.64 1602.57   1 0.73359-0.73610 0.67956-0.30523-0.00486 0.60414
   1   3 -1313736.08 1854.47   1 0.21952-0.21767-0.58495 0.95868-0.78079 0.18315
   1  -3 -1313729.80 1631.14   1 0.62518-0.62369-0.77725 0.40323 0.07083-0.66962
   1   3 -1316171.69 1896.22   1 0.74102-0.73956-0.29895 0.67307-0.60126 0.00207
  -1  -3  12 7566.12 1418.94   1 0.18386-0.19004 0.57708-0.95131 0.79571-0.24266
   1   3 -12 5824.19  972.90   1 0.20968-0.20338-0.57587 0.94959-0.79019 0.23853
   1  -3 -12 7850.52 1134.32   1 0.63156-0.62559-0.76566 0.39164 0.12197-0.67471
  -1   3  12 5312.23  721.79   1-0.10214 0.09498 0.96331-0.58937-0.24818 0.80225
   1   3 -12 7293.93 1071.91   1 0.74079-0.73486-0.30247 0.67660-0.59977 0.04668
  -1  -3  1152054.03 1699.73   1 0.16050-0.17115 0.56303-0.93725 0.81069-0.30373
  -1   3  1146334.38 1700.22   1 0.74947-0.76078 0.65755-0.28322-0.07686 0.58394
   1   3 -1148734.23 2581.52   1 0.19586-0.18512-0.56295 0.93668-0.80294 0.29725
   1  -3 -1153340.43 1891.04   1 0.63641-0.62596-0.75099 0.37697 0.17600-0.68268
  -1   3  1144557.53 1680.61   1-0.03392 0.02237 0.95050-0.57657-0.30884 0.81673
   1   3 -1151819.66 1843.96   1 0.74078-0.73038-0.30258 0.67671-0.59973 0.09272
  -1  -3  1025965.92 2342.25   1 0.13031-0.14543 0.54419-0.91842 0.82877-0.36789
  -1   3  1027018.14 2525.47   1 0.75606-0.77178 0.64435-0.27002-0.11472 0.57570
   1   3 -1033751.28 3603.85   1 0.17718-0.16200-0.54518 0.91891-0.81937 0.35965
   1  -3 -1026682.41 2475.71   1 0.63938-0.62445-0.73265 0.35863 0.23324-0.69385
  -1   3  1026738.98 2465.72   1 0.03621-0.05164 0.92865-0.55491-0.36917 0.83030
   1   3 -1032383.07 2958.69   1 0.74102-0.72614-0.29893 0.67306-0.60126 0.14035
  -1  -3   970507.15 2465.09   1 0.09215-0.11173 0.51934-0.89357 0.84957-0.43479
  -1   3   955557.42 2179.83   1 0.76140-0.78157 0.62970-0.25543-0.15405 0.56911
   1   3  -955938.64 2041.10   1 0.15254-0.13291-0.52120 0.89493-0.83968 0.42593
   1  -3  -966538.02 2474.14   1 0.63979-0.62047-0.71015 0.33616 0.29385-0.70852
  -1   3   951468.28 1946.17   1 0.10822-0.12808 0.89774-0.52400-0.42701 0.84202
   1   3  -959472.38 2251.51   1 0.74148-0.72213-0.29110 0.66522-0.60452 0.18970
  -1  -3   8 9761.02  875.72   1 0.04503-0.06896 0.48747-0.86161 0.87197-0.50285
  -1   3   8 7911.96  786.22   1 0.76579-0.79036 0.61268-0.23841-0.19539 0.56433
   1   3  -810137.91 1295.56   1 0.12066-0.09641-0.48952 0.86278-0.86359 0.49628
   1  -3  -8 9646.40 1004.49   1 0.63739-0.61359-0.68208 0.30809 0.35844-0.72703
  -1   3   8 9235.51 1151.35   1 0.18090-0.20519 0.85727-0.48353-0.48203 0.85093
   1   3  -810664.15 1131.72   1 0.74211-0.71829-0.27857 0.65270-0.60963 0.24090
  -1  -3   7139196.3 3499.42   1-0.01222-0.01617 0.44595-0.82010 0.89496-0.57198
  -1   3   7139411.8 3597.88   1 0.76877-0.79774 0.59317-0.21890-0.23902 0.56185
   1   3  -7137946.3 3436.40   1 0.07968-0.05101-0.44713 0.82039-0.89090 0.56951
   1  -3  -7142127.1 3653.04   1 0.63116-0.60287-0.64756 0.27357 0.42694-0.74946
  -1   3   7135581.1 3527.56   1 0.25315-0.28217 0.80754-0.43400-0.53270 0.85558
   1   3  -7146135.5 3798.86   1 0.74278-0.71448-0.26074 0.63486-0.61667 0.29403
  -1  -3   619815.28 1786.56   1-0.07985 0.04696 0.39368-0.76783 0.91576-0.63892
  -1   3   633218.87 1726.56   1 0.77000-0.80338 0.57061-0.19635-0.28544 0.56215
   1   3  -630789.67 1534.05   1 0.02801 0.00507-0.39153 0.76479-0.91973 0.64425
   1  -3  -620197.05 1820.37   1 0.62004-0.58763-0.60582 0.23193 0.49851-0.77516
  -1   3   632692.93 1664.86   1 0.32353-0.35694 0.74854-0.37499-0.57880 0.85555
  -1  -3   5172287.4 4230.71   1-0.15716 0.11977 0.32914-0.70320 0.93110-0.70082
  -1   3   5179614.7 4492.08   1 0.76901-0.80679 0.54425-0.16998-0.33526 0.56585
   1   3  -5180099.2 4437.50   1-0.03540 0.07279-0.31943 0.69337-0.94694 0.71688
   1  -3  -5177164.2 4421.48   1 0.60268-0.56571-0.55425 0.18036 0.57408-0.80463
  -1   3   5185215.8 4572.48   1 0.39111-0.42890 0.68136-0.30752-0.61868 0.84939
   1   3  -5193413.1 4879.62   1 0.74403-0.70635-0.20678 0.58088-0.63533 0.40450
  -1  -3   4125520.6 3090.10   1-0.24147 0.19961 0.25360-0.62765 0.93668-0.75246
  -1   3   491250.17 2384.08   1 0.76504-0.80726 0.51308-0.13870-0.38917 0.57365
   1   3  -4100378.8 2495.29   1-0.11162 0.15346-0.22885 0.60280-0.96703 0.78299
   1  -3  -4124192.7 3126.00   1 0.57754-0.53601-0.49196 0.11807 0.65147-0.83590
  -1   3   4106013.6 2698.76   1 0.45347-0.49564 0.60784-0.23400-0.65183 0.83640
   1   3  -4107759.4 2839.43   1 0.74281-0.70074-0.16839 0.54250-0.64796 0.46330
   1   3  -326228.25 1161.24   1 0.09077-0.04440 0.51843-0.14420 0.85028-0.98855
  -1   3   328992.50 1363.50   1 0.75701-0.80362 0.47552-0.10114-0.44811 0.58648
   1   3  -328195.10 1278.11   1 0.32764-0.28107-0.16885 0.54345-0.92959 0.79098
  -1  -3   330077.42 1323.40   1 0.17226-0.21857-0.54044 0.16671-0.82355 0.96147
   1  -3  -333631.71 1546.58   1 0.54295-0.49689-0.41798 0.04404 0.72835-0.86668
  -1  -3   334387.81 1519.46   1 0.19859-0.24481 0.11967-0.49371 0.97274-0.83445
  -1   3   331260.63 1435.71   1 0.50984-0.55641 0.52989-0.15606-0.67769 0.81611
   1   3  -329713.02 1415.83   1 0.73970-0.69322-0.12135 0.49546-0.66190 0.52340
   1   3  -246691.64 2021.11   1-0.03443 0.08523 0.42918-0.05504 0.90255-0.99483
  -1   3   246281.85 2048.04   1 0.74321-0.79421 0.42962-0.05525-0.51287 0.60511
   1  -3  -249611.89 2160.30   1 0.54281-0.49175 0.07817-0.45275-0.83620 0.74376
   1   3  -248249.03 2134.38   1 0.41319-0.36222-0.07787 0.45246-0.90730 0.81490
  -1  -3   249332.10 2135.70   1 0.06498-0.11573-0.43156 0.05830-0.89974 0.99156
   1  -3  -253273.90 2355.90   1 0.49798-0.44735-0.33193-0.04200 0.80114-0.89336
  -1  -3   254358.24 2353.62   1 0.29101-0.34173-0.00546-0.36857 0.95670-0.86450
  -1   3   250695.43 2248.44   1 0.55957-0.61055 0.44991-0.07596-0.69602 0.78832
   1   3  -245834.21 2083.33   1 0.73364-0.68276-0.06480 0.43890-0.67644 0.58411
  -1   3   169572.66 1826.24   1 0.72111-0.77650 0.37278 0.00162-0.58397 0.63011
   1   3  -172018.16 1870.85   1 0.49192-0.43655 0.01415 0.36044-0.87052 0.82431
   1  -3  -177566.42 1976.64   1 0.46683-0.41145-0.01617-0.35842-0.88419 0.83799
  -1  -3   174746.30 1878.65   1-0.04893-0.00626-0.30373-0.07021-0.95150 0.99751
   1  -3  -184537.77 2193.26   1 0.44243-0.38724-0.23533-0.13869 0.86537-0.91148
  -1  -3   186180.73 2189.54   1 0.38105-0.43624-0.13743-0.23659 0.91428-0.86816
  -1   3   073376.50 1886.56   1 0.68695-0.74671 0.30162 0.07278-0.66115 0.66115
   1   3   075659.98 1977.39   1 0.56094-0.50117 0.10255 0.27203-0.82147 0.82147
   1  -3   077378.60 1954.66   1 0.36089-0.30111-0.13447-0.24012-0.92286 0.92286
  -1  -3   071412.70 1820.08   1-0.16215 0.10250-0.16586-0.20808-0.97272 0.97272
  -1  -3   083214.81 2115.91   1 0.46028-0.52005-0.26534-0.10868 0.84718-0.84718
   1  -3   081348.33 2099.20   1 0.37719-0.31742-0.13151-0.24251 0.91674-0.91674
  -1   3   077744.89 2065.27   1 0.63651-0.69626 0.29344 0.08050-0.71325 0.71325
  -1   3  -136819.50 1590.87   1-0.22069 0.15649 0.27279 0.10126 0.93641-0.98247
  -1   3  -137358.57 1645.55   1 0.63596-0.70010 0.21308 0.16132-0.74171 0.69557
   1   3   137950.90 1708.97   1 0.61757-0.55344 0.18425 0.19033-0.76462 0.81084
  -1  -3  -132608.32 1459.20   1 0.52344-0.58779-0.37951 0.00557 0.76287-0.80898
   1  -3   133441.19 1513.74   1 0.30525-0.24103-0.02563-0.34839 0.95192-0.90582
   1   3   133488.28 1469.86   1 0.26472-0.20049 0.03113 0.34290 0.96382-0.91772
  -1   3  -137748.99 1736.95   1 0.66485-0.72893 0.22119 0.15287-0.71346 0.66729
   1   3   137758.98 1693.42   1 0.68314-0.61906 0.16612 0.20794-0.71113 0.75730
  -1   3  -2169567.9 1442.52   1-0.04670-0.02201 0.41975-0.04560 0.90643-0.99871
   1   3   2191738.9 1887.59   1 0.66237-0.59386 0.25706 0.11734-0.70368 0.79596
  -1   3  -2186513.7 1645.79   1 0.56324-0.63173 0.10570 0.26888-0.81950 0.72706
  -1  -3  -2179448.1 1670.25   1 0.57005-0.63892-0.47501 0.10112 0.67037-0.76259
   1  -3   2172623.2 1638.92   1 0.23103-0.16230 0.07682-0.45086 0.96990-0.87771
   1   3   2178238.9 1730.70   1 0.64922-0.58070 0.26193 0.11202-0.71406 0.80636
  -1   3  -2177998.6 1803.08   1 0.68654-0.75501 0.15499 0.21907-0.71037 0.61803
  -1   3  -337820.78 1630.05   1 0.14149-0.21465 0.55125-0.17703 0.82224-0.96051
   1   3   340683.67 1850.14   1 0.69699-0.62411 0.32120 0.05320-0.64110 0.77952
  -1   3  -339067.58 1700.30   1 0.46686-0.53986-0.01613 0.39072-0.88418 0.74557
  -1   3  -335987.98 1600.57   1-0.15859 0.08559-0.17038 0.54432-0.97253 0.83449
  -1  -3  -343326.43 1918.79   1 0.60170-0.67513-0.55162 0.17773 0.57763-0.71595
   1   3   340044.78 1801.16   1 0.60477-0.53186 0.36404 0.00990-0.70832 0.84677
  -1   3  -337755.47 1726.31   1 0.70296-0.77582 0.09572 0.27834-0.70475 0.56623
  -1   3  -468086.23 3204.90   1 0.31593-0.39356 0.64759-0.27325 0.69340-0.87774
   1   3   471479.14 3458.04   1 0.72289-0.64563 0.37692-0.00251-0.57909 0.76364
  -1   3  -472065.09 3399.97   1 0.35351-0.43091-0.14220 0.51680-0.92455 0.73974
  -1   3  -472665.33 3542.39   1-0.09190 0.01445-0.25278 0.62673-0.96314 0.77909
  -1  -3  -466016.41 3167.91   1 0.62175-0.69974-0.61160 0.23771 0.48925-0.67368
   1   3   473502.84 3511.43   1 0.54852-0.47123 0.46889-0.09494-0.69228 0.87688
  -1   3  -475203.13 3614.96   1 0.71508-0.79233 0.04381 0.33025-0.69766 0.51297
   1  -3   570415.41 3318.42   1-0.23704 0.31912 0.25772-0.63177 0.93668-0.70641
  -1   3  -563736.03 3005.33   1 0.45681-0.53892 0.70290-0.32850 0.54519-0.77565
   1   3   567697.51 3299.41   1 0.74161-0.65990 0.42499-0.05061-0.51903 0.74963
  -1   3  -567166.47 3241.91   1-0.03276-0.04914-0.32247 0.69641-0.94601 0.71595
  -1  -3  -576846.53 3699.72   1 0.63327-0.71547-0.65756 0.28357 0.40812-0.63849
   1   3   568956.64 3289.27   1 0.48030-0.39859 0.57226-0.19843-0.66469 0.89540
  -1   3  -570826.77 3424.64   1 0.72375-0.80540-0.00063 0.37474-0.69006 0.45923
   1  -3   650471.91 2393.86   1-0.12535 0.21199 0.35651-0.73065 0.92584-0.64900
  -1   3  -649134.16 2329.08   1 0.55980-0.64638 0.72507-0.35067 0.40110-0.67764
   1   3   653871.35 2724.18   1 0.75467-0.66858 0.46669-0.09231-0.46115 0.73788
  -1   3  -646576.18 2456.39   1 0.01773-0.10382-0.38019 0.75344-0.92473 0.64925
  -1  -3  -653535.62 2630.16   1 0.63871-0.72540-0.69355 0.31956 0.33319-0.60963
   1   3   654061.20 2594.78   1 0.40194-0.31583 0.66943-0.29559-0.62474 0.90159
  -1   3  -654494.09 2670.72   1 0.72989-0.81593-0.03796 0.41206-0.68250 0.40551
   1  -3   7117850.8 2901.46   1-0.02945 0.12057 0.43297-0.80712 0.90092-0.57794
  -1   3  -799461.44 2456.42   1 0.63114-0.72216 0.72603-0.35157 0.27299-0.59571
   1   3   7107862.8 2872.90   1 0.76318-0.67270 0.50285-0.12847-0.40582 0.72866
  -1   3  -7114285.4 2935.42   1 0.06024-0.15075-0.42650 0.79976-0.90247 0.58108
  -1  -3  -7110276.3 2843.72   1 0.63983-0.73101-0.72147 0.34748 0.26473-0.58725
   1   3   7106702.8 2798.55   1 0.31474-0.22422 0.75651-0.38296-0.57325 0.89613
  -1   3  -7111249.4 2898.35   1 0.73411-0.82456-0.06851 0.44261-0.67556 0.35240
  -1   3  -846713.34 1218.81   1 0.67969-0.77517 0.71511-0.34064 0.16321-0.53203
  -1   3  -851602.58 1859.37   1 0.09519-0.19011-0.46336 0.83662-0.88104 0.51373
  -1  -3  -865896.10 1843.87   1 0.63805-0.73361-0.74296 0.36894 0.20220-0.57069
   1   3   848187.19 1454.44   1 0.22269-0.12778 0.82986-0.45632-0.51158 0.88058
  -1   3  -851815.38 1576.47   1 0.73695-0.83179-0.09278 0.46688-0.66954 0.30022
   1  -3   916295.75 1588.31   1 0.10911-0.00917 0.53053-0.90476 0.84060-0.42582
   1   3   913233.19 1301.09   1 0.76994-0.67054 0.56173-0.18746-0.30273 0.71779
  -1   3  -912430.55 1438.61   1 0.12347-0.22281-0.49238 0.86563-0.86157 0.44835
  -1  -3  -915427.75 1398.15   1 0.63383-0.73386-0.75984 0.38582 0.14453-0.55908
   1   3   911671.96 1221.46   1 0.12804-0.02840 0.88765-0.51391-0.44235 0.85737
  -1   3  -913432.17 1201.94   1 0.73880-0.83804-0.11126 0.48537-0.66467 0.24918
   1  -3  1069200.25 2432.03   1 0.15566-0.05125 0.56006-0.93428 0.81369-0.35281
   1   3  1071071.23 2700.28   1 0.76940-0.66561 0.58586-0.21159-0.25449 0.71567
  -1   3 -1072960.37 3881.41   1 0.14602-0.24978-0.51498 0.88824-0.84467 0.38553
  -1  -3 -1079677.42 2945.03   1 0.62792-0.73244-0.77292 0.39889 0.09111-0.55173
   1   3  1060587.37 2171.51   1 0.03387 0.07019 0.92950-0.55577-0.36723 0.82836
  -1   3 -1073501.78 2713.22   1 0.73996-0.84360-0.12447 0.49858-0.66102 0.19937
   1  -3  1121056.43 2303.40   1 0.19054-0.08166 0.58102-0.95524 0.79126-0.28430
   1   3  1124964.60 1197.34   1 0.76684-0.65865 0.60711-0.23284-0.20822 0.71551
  -1   3 -1128750.77 1970.14   1 0.16351-0.27206-0.53195 0.90568-0.83083 0.32514
  -1  -3 -1122393.43 2290.16   1 0.62072-0.72972-0.78293 0.40891 0.04131-0.54799
   1   3  1120458.09 2559.38   1-0.05724 0.16525 0.95578-0.58185-0.28843 0.79632
  -1   3 -1125867.41 1125.19   1 0.74062-0.84866-0.13286 0.50697-0.65864 0.15083
   1  -3  1225682.28 1580.57   1 0.21608-0.10274 0.59573-0.96995 0.77356-0.22051
   1   3  1226459.45 1808.02   1 0.76256-0.64996 0.62585-0.25159-0.16369 0.71711
  -1   3 -1228494.45 2430.14   1 0.17704-0.29003-0.54504 0.91877-0.81950 0.26783
  -1  -3 -1226156.85 1788.80   1 0.61276-0.72621-0.79025 0.41608-0.00540-0.54725
   1   3  1227252.51 1680.06   1-0.14481 0.25721 0.96718-0.59325-0.20875 0.76281
  -1   3 -1230046.26 1939.51   1 0.74092-0.85335-0.13684 0.51095-0.65749 0.10351
   1  -3  1314912.11 1883.51   1 0.23418-0.11638 0.60580-0.98003 0.76036-0.16122
   1   3  1320905.41 1736.26   1 0.75703-0.64003 0.64209-0.26775-0.12091 0.72018
  -1   3 -1322130.89 2645.52   1 0.18706-0.30450-0.55462 0.92835-0.81080 0.21316
  -1  -3 -1318370.89 2228.21   1 0.60369-0.72163-0.79567 0.42150-0.04955-0.54916
  -1   3 -1320680.19 1516.42   1 0.74091-0.85774-0.13675 0.51086-0.65752 0.05737
   1  -3  1436997.14 2600.66   1 0.24627-0.12400 0.61237-0.98660 0.75122-0.10599
   1   3  1443328.50 3081.63   1 0.74993-0.62853 0.65673-0.28239-0.07933 0.72470
  -1   3 -1439148.40 3247.18   1 0.19409-0.31598-0.56128 0.93501-0.80453 0.16093
  -1  -3 -1444720.66 3188.66   1 0.59391-0.71632-0.79931 0.42514-0.09148-0.55328
   1  -3  15 2296.16  540.51   1 0.25346-0.12673 0.61622-0.99044 0.74567-0.05435
   1   3  15 3261.15  745.54   1 0.74165-0.61584 0.66965-0.29531-0.03895 0.73042
  -1   3 -15 3039.41  745.20   1 0.19856-0.32489-0.56549 0.93922-0.80049 0.11091
  -1  -3 -15 5130.20 1050.89   1 0.58349-0.71038-0.80139 0.42723-0.13152-0.55930
  -1   3 -15 3703.39  705.45   1 0.74004-0.86566-0.12550 0.49960-0.66074-0.03173
   1   3  16 8926.22  967.43   1 0.73227-0.60206 0.68101-0.30667 0.00036 0.73720
  -1   3 -1611148.05 1955.60   1 0.20080-0.33158-0.56759 0.94132-0.79844 0.06288
  -1  -3 -1612360.59 1071.29   1 0.57248-0.70386-0.80211 0.42794-0.16992-0.56695
  -1   3 -1611309.46  840.24   1 0.73912-0.86914-0.11474 0.48885-0.66372-0.07491
   1   3  17  880.04  708.14   1 0.72186-0.58725 0.69094-0.31661 0.03875 0.74491
  -1   3 -17  717.54  357.15   1 0.20109-0.33632-0.56787 0.94160-0.79817 0.01664
  -1  -3 -17  593.65  539.11   1 0.56094-0.69679-0.80157 0.42740-0.20692-0.57601
  -1   3 -17 2074.40  654.27   1 0.73778-0.87220-0.10076 0.47486-0.66747-0.11733
   1   3  1810469.73 1517.18   1 0.71048-0.57146 0.69955-0.32522 0.07633 0.75342
  -1   3 -18 7772.87 1536.19   1 0.19966-0.33932-0.56652 0.94025-0.79949-0.02800
  -1  -3 -1818209.58 2238.44   1 0.54887-0.68921-0.79989 0.42572-0.24269-0.58629
  -1   4  16 4473.64 1122.19   1 0.71653-0.70582 0.69523-0.19612 0.05687 0.68069
   1   4 -16 5708.20 1309.01   1 0.11654-0.12762-0.48533 0.98301-0.86652 0.13191
   1  -4 -16 6008.75  725.04   1 0.61153-0.62353-0.79113 0.29224-0.01176-0.72511
   1   4 -16 8975.42  876.72   1 0.74204-0.75273-0.15385 0.65266-0.65245-0.08618
  -1  -4  15 4766.44 1326.55   1 0.03994-0.03251 0.48388-0.98273 0.87422-0.18211
  -1   4  15 4709.41 1148.02   1 0.72619-0.71989 0.68709-0.18797 0.02332 0.66814
   1   4 -15 6561.88 1505.69   1 0.10995-0.11662-0.47860 0.97628-0.87111 0.18241
   1  -4 -15 8161.05 1104.96   1 0.61951-0.62698-0.78425 0.28555 0.03388-0.72480
   1   4 -15 7429.75 1021.87   1 0.74252-0.74882-0.16258 0.66139-0.64978-0.04269
  -1  -4  1423770.88 1862.42   1 0.02460-0.02165 0.47294-0.97180 0.88074-0.23478
  -1   4  1423837.94 1856.88   1 0.73505-0.73315 0.67791-0.17880-0.01075 0.65612
   1   4 -1420200.34 2710.16   1 0.10057-0.10281-0.46893 0.96661-0.87748 0.23469
   1  -4 -1422595.23 1787.73   1 0.62662-0.62961-0.77507 0.27638 0.08122-0.72608
  -1   4  1420928.42 1551.28   1-0.12307 0.12468 0.96561-0.46703-0.22898 0.87540
   1   4 -1424847.85 1884.32   1 0.74282-0.74472-0.16856 0.66737-0.64791 0.00160
  -1  -4  1322447.63 1703.76   1 0.00469-0.00623 0.45849-0.95735 0.88868-0.28886
  -1   4  1320203.75 1682.13   1 0.74308-0.74558 0.66765-0.16854-0.04546 0.64474
   1   4 -1320007.69 2008.70   1 0.08798-0.08581-0.45585 0.95352-0.88569 0.28882
   1  -4 -1320603.72 1604.35   1 0.63245-0.63096-0.76354 0.26484 0.13040-0.72920
  -1   4  1317874.21 1779.82   1-0.05861 0.05584 0.95606-0.45749-0.28721 0.88745
   1   4 -1322605.66 1805.92   1 0.74296-0.74046-0.17165 0.67046-0.64694 0.04679
  -1  -4  1221391.62 1965.15   1-0.02021 0.01420 0.43996-0.93882 0.89778-0.34410
  -1   4  1216229.22 1499.64   1 0.75023-0.75714 0.65620-0.15709-0.08090 0.63407
   1   4 -1214857.93 2100.12   1 0.07173-0.06514-0.43874 0.93641-0.89574 0.34478
   1  -4 -1217765.15 1592.57   1 0.63680-0.63083-0.74933 0.25064 0.18158-0.73431
  -1   4  1210161.53 1770.83   1 0.00665-0.01381 0.93910-0.44052-0.34356 0.89763
   1   4 -1217513.16 1529.61   1 0.74297-0.73607-0.17168 0.67049-0.64693 0.09294
  -1  -4  11  599.88  242.52   1-0.05057 0.04008 0.41675-0.91560 0.90761-0.40007
  -1   4  11  170.20  512.63   1 0.75645-0.76776 0.64346-0.14435-0.11717 0.62425
   1   4 -11  942.24  274.89   1 0.05128-0.04027-0.41686 0.91454-0.90751 0.40247
   1  -4 -11 1684.89  679.36   1 0.63943-0.62898-0.73209 0.23339 0.23487-0.74155
  -1   4  11  285.36  223.18   1 0.07195-0.08293 0.91443-0.41612-0.39827 0.90551
   1   4 -11 2045.45  687.59   1 0.74282-0.73152-0.16845 0.66725-0.64795 0.14013
  -1  -4  1021991.10 1366.68   1-0.08672 0.07175 0.38817-0.88703 0.91749-0.45609
  -1   4  1018525.97 1417.28   1 0.76144-0.77721 0.62958-0.13055-0.15436 0.61554
   1   4 -1016498.91 1959.78   1 0.02603-0.01061-0.38935 0.88703-0.92071 0.46158
   1  -4 -1021508.33 1455.95   1 0.63982-0.62500-0.71158 0.21293 0.29027-0.75101
  -1   4  1014399.04 1962.73   1 0.13714-0.15256 0.88278-0.38446-0.44931 0.91044
   1   4 -1015657.21 1790.20   1 0.74248-0.72678-0.16170 0.66051-0.65005 0.18840
  -1  -4   958913.70 2676.87   1-0.12882 0.10937 0.35360-0.85246 0.92648-0.51121
  -1   4   966023.72 3172.46   1 0.76556-0.78573 0.61380-0.11478-0.19276 0.60782
   1   4  -961991.38 3074.46   1-0.00462 0.02446-0.35518 0.85286-0.93478 0.52156
   1  -4  -956013.97 2710.88   1 0.63800-0.61868-0.68686 0.18821 0.34809-0.76275
  -1   4   956002.60 2684.50   1 0.20129-0.22114 0.84417-0.34585-0.49683 0.91185
   1   4  -968767.19 3315.37   1 0.74188-0.72179-0.15117 0.64998-0.65326 0.23777
  -1  -4   823981.75  928.29   1-0.17683 0.15285 0.31205-0.81079 0.93346-0.56501
  -1   4   835198.46 1352.01   1 0.76843-0.79301 0.59621-0.09718-0.23246 0.60140
   1   4  -841101.70 2071.15   1-0.04111 0.06515-0.31282 0.81141-0.94892 0.58082
   1  -4  -826067.19 1120.79   1 0.63327-0.60947-0.65756 0.15891 0.40812-0.77671
  -1   4   836538.45 2347.66   1 0.26374-0.28836 0.79935-0.30129-0.53988 0.90888
  -1  -4   746165.20 1699.79   1-0.23006 0.20160 0.26418-0.76293 0.93663-0.61423
  -1   4   732615.84 2989.21   1 0.76988-0.79886 0.57651-0.07749-0.27367 0.59649
   1   4  -732696.56 3162.17   1-0.08417 0.11266-0.26207 0.76067-0.96136 0.63928
   1  -4  -743598.14 1685.98   1 0.62510-0.59681-0.62304 0.12439 0.47016-0.79268
  -1   4   732673.41 3430.06   1 0.32349-0.35251 0.74857-0.25051-0.57877 0.90165
  -1  -4   638827.12 1410.17   1-0.28745 0.25453 0.20975-0.70850 0.93454-0.65820
  -1   4   642040.85 1687.68   1 0.76967-0.80305 0.55439-0.05536-0.31662 0.59332
   1   4  -639678.42 1453.53   1-0.13372 0.16667-0.20160 0.70019-0.97029 0.69422
   1  -4  -638478.09 1504.01   1 0.61286-0.58045-0.58315 0.08463 0.53322-0.80988
  -1   4   637772.20 1707.82   1 0.37989-0.41330 0.69299-0.19493-0.61273 0.88948
   1   4  -645787.95 1833.70   1 0.73702-0.70374-0.09346 0.59226-0.66937 0.39238
  -1   4   512454.43 1135.60   1 0.76747-0.80525 0.52939-0.03036-0.36156 0.59215
   1   4  -512654.87 1124.57   1 0.34607-0.30832-0.14994 0.64940-0.92614 0.69513
   1  -4  -5 9471.54  914.05   1 0.59583-0.55886-0.53624 0.03772 0.59785-0.82840
  -1  -4   510337.26  920.15   1 0.18944-0.22666 0.13156-0.63027 0.97303-0.74254
  -1   4   513893.98 1215.81   1 0.43270-0.47048 0.63366-0.13521-0.64127 0.87198
   1   4  -513862.65 1283.89   1 0.73357-0.69589-0.06426 0.56307-0.67656 0.44574
  -1   4   422753.41 1783.04   1 0.76282-0.80505 0.50104-0.00187-0.40871 0.59320
   1   4  -424881.54 1944.08   1 0.40659-0.36443-0.08519 0.58465-0.90962 0.72482
   1  -4  -428472.31 2195.21   1 0.57333-0.53181-0.48237-0.01614 0.66227-0.84670
  -1  -4   429610.23 2247.17   1 0.24989-0.29160 0.05140-0.55012 0.96690-0.78251
  -1   4   426056.65 2013.84   1 0.48050-0.52267 0.57199-0.07354-0.66478 0.84935
   1   4  -424991.65 1978.65   1 0.72858-0.68650-0.02943 0.52824-0.68432 0.49966
  -1   4   374701.96 2016.99   1 0.75517-0.80178 0.46852 0.03063-0.45846 0.59682
   1   4  -374451.67 1955.79   1 0.46543-0.41887-0.01783 0.51729-0.88490 0.74629
   1  -4  -373324.53 1971.18   1 0.54467-0.49862-0.42147-0.07711 0.72504-0.86338
  -1  -4   373618.31 1906.48   1 0.31283-0.35905-0.03647-0.46223 0.94910-0.81081
  -1   4   380109.83 2161.95   1 0.52337-0.56994 0.50924-0.01080-0.68318 0.82161
   1   4  -377784.65 2143.86   1 0.72162-0.67510 0.01123 0.48752-0.69219 0.55367
  -1   4   2100862.1 2602.86   1 0.74372-0.79471 0.43110 0.06806-0.51090 0.60315
   1   4  -2108981.7 2775.79   1 0.52112-0.47006 0.04991 0.44952-0.85201 0.75957
   1  -4  -2113950.6 2921.30   1 0.50979-0.45917-0.35369-0.14489 0.78422-0.87645
  -1  -4   2109433.2 2755.85   1 0.37542-0.42604-0.12880-0.36989 0.91785-0.82563
  -1   4   2110326.4 2858.17   1 0.56135-0.61233 0.44679 0.05180-0.69659 0.78889
   1   4  -2107048.3 2812.63   1 0.71191-0.66100 0.05828 0.44047-0.69984 0.60749
  -1   4   151265.93 1433.92   1 0.72744-0.78282 0.38779 0.11136-0.56607 0.61219
   1   4  -158568.53 1586.03   1 0.57097-0.51556 0.11637 0.38306-0.81267 0.76645
  -1  -4   166885.06 1752.78   1 0.43427-0.48946-0.22187-0.27683 0.87302-0.82691
   1  -4  -163216.32 1705.01   1 0.46870-0.41350-0.28007-0.21851 0.83778-0.88389
  -1   4   157770.30 1614.17   1 0.59403-0.64939 0.38580 0.11279-0.70588 0.75203
   1   4  -154851.98 1564.03   1 0.69881-0.64351 0.11169 0.38706-0.70652 0.66035
   1   4   011542.12  982.97   1 0.61461-0.55484 0.17974 0.31970-0.76807 0.76807
  -1  -4   012592.90 1007.58   1 0.48646-0.54624-0.31120-0.18738 0.81639-0.81639
   1  -4   011497.43  950.00   1 0.42226-0.36249-0.20232-0.29637 0.88360-0.88360
  -1   4   011706.76 1008.73   1 0.62182-0.68157 0.32739 0.17120-0.71143 0.71143
   1   4   0 9715.97  911.32   1 0.68150-0.62181 0.17139 0.32736-0.71146 0.71146
  -1   4  -180070.93 2075.81   1 0.67502-0.73916 0.27947 0.21973-0.68281 0.63667
   1   4   183491.78 2228.42   1 0.65159-0.58745 0.23868 0.26052-0.72003 0.76617
  -1  -4  -182868.78 2145.70   1 0.53065-0.59501-0.39350-0.10508 0.75070-0.79681
   1  -4   178612.13 2059.67   1 0.37136-0.30702-0.12261-0.37608 0.92035-0.87424
  -1   4  -182404.65 2211.69   1 0.64507-0.70921 0.27246 0.22614-0.71389 0.66774
   1   4   179593.83 2132.09   1 0.65913-0.59505 0.23701 0.26173-0.71369 0.75986
  -1   4  -220542.58 1764.28   1-0.04064-0.02807 0.42442 0.07443 0.90455-0.99683
   1   4   226292.24 2056.05   1 0.68236-0.61385 0.29298 0.20623-0.66973 0.76200
  -1   4  -225465.51 1936.72   1 0.63591-0.70442 0.21299 0.28621-0.74178 0.64951
  -1  -4  -220171.05 1584.78   1 0.56618-0.63506-0.46648-0.03203 0.67957-0.77179
   1  -4   221955.48 1711.56   1 0.31786-0.24913-0.04371-0.45499 0.94712-0.85493
   1   4   222223.57 1745.97   1 0.63041-0.56189 0.30783 0.19077-0.71260 0.80490
  -1   4  -225597.46 1993.22   1 0.66465-0.73312 0.22176 0.27698-0.71347 0.62113
  -1   4  -359577.79 1493.13   1 0.09756-0.17072 0.52294-0.02397 0.84676-0.98502
   1   4   376528.30 2082.48   1 0.70730-0.63441 0.34232 0.15688-0.61849 0.75690
  -1   4  -376567.88 1973.00   1 0.58647-0.65931 0.13824 0.36119-0.79807 0.65942
  -1  -4  -364741.95 1745.96   1 0.59317-0.66660-0.52950 0.03098 0.60643-0.74476
   1  -4   361610.70 1678.86   1 0.26396-0.19073 0.03216-0.53088 0.96399-0.82570
   1   4   376545.32 2043.44   1 0.59550-0.52259 0.38288 0.11572-0.70623 0.84468
  -1   4  -375125.00 2066.63   1 0.68016-0.75302 0.17563 0.32312-0.71170 0.57318
  -1   4  -419974.48 1618.15   1 0.23587-0.31349 0.60673-0.10776 0.75910-0.94345
   1   4   424131.37 2069.52   1 0.72700-0.64969 0.38673 0.11242-0.56735 0.75183
  -1   4  -426110.48 2340.49   1 0.52702-0.60421 0.05749 0.44194-0.84790 0.66302
  -1  -4  -430633.12 1205.20   1 0.61274-0.69073-0.58280 0.08428 0.53374-0.71817
   1  -4   430540.23 1179.09   1 0.21145-0.13372 0.10282-0.60153 0.97196-0.78757
   1   4   425379.50 2116.03   1 0.55340-0.47611 0.46060 0.03799-0.69396 0.87856
  -1   4  -424534.99 2060.52   1 0.69257-0.76981 0.13437 0.36437-0.70872 0.52403
  -1   4  -5111672.4 3778.07   1 0.36323-0.44533 0.66874-0.16962 0.64872-0.87915
   1   4   5145241.2 5034.98   1 0.74222-0.66052 0.42675 0.07240-0.51669 0.74730
  -1   4  -5142889.2 4838.95   1 0.45864-0.54044-0.02585 0.52531-0.88824 0.65723
  -1   4  -5141463.2 4848.70   1-0.16181 0.07990-0.16630 0.66489-0.97270 0.74264
  -1  -4  -5128879.6 4458.96   1 0.62611-0.70830-0.62679 0.12813 0.46380-0.69417
   1   4   5148798.5 5094.47   1 0.50356-0.42185 0.53920-0.04076-0.67503 0.90574
  -1   4  -5136947.8 4769.77   1 0.70235-0.78399 0.09810 0.40064-0.70503 0.47416
  -1   4  -6 4946.19  467.71   1 0.47170-0.55828 0.70724-0.20804 0.52659-0.80314
   1   4   6 5297.93  703.20   1 0.75355-0.66746 0.46265 0.03650-0.46701 0.74374
  -1   4  -6 6978.36  696.27   1 0.38590-0.47211-0.10781 0.60727-0.91621 0.63900
  -1   4  -6 7538.32  804.30   1-0.11650 0.03014-0.22287 0.72147-0.96785 0.69178
  -1  -4  -6 4707.79  622.14   1 0.63443-0.72112-0.66356 0.16491 0.39644-0.67289
   1   4   6 7308.64  750.40   1 0.44660-0.36049 0.61653-0.11809-0.64840 0.92525
  -1   4  -6 5298.15  613.33   1 0.70997-0.79600 0.06679 0.43195-0.70105 0.42401
   1   4   732378.15 2955.28   1 0.76155-0.67107 0.49484 0.00431-0.41852 0.74137
  -1   4  -735812.45 3776.28   1-0.07591-0.01488-0.27193 0.77052-0.95931 0.63723
  -1  -4  -742627.75 1682.52   1 0.63874-0.72992-0.69384 0.19518 0.33254-0.65506
   1   4   734543.55 3255.92   1 0.38222-0.29170 0.69052-0.19246-0.61406 0.93694
  -1   4  -735500.54 3215.47   1 0.71582-0.80624 0.04031 0.45844-0.69711 0.37390
   1  -4   8 3365.53  410.98   1-0.24481 0.34029 0.25048-0.74922 0.93665-0.56820
   1   4   8 2282.99  529.83   1 0.76669-0.67183 0.52372-0.02456-0.37132 0.74029
  -1   4  -8 1214.90  267.53   1-0.04029-0.05496-0.31377 0.81236-0.94864 0.58054
  -1  -4  -8 3541.23  562.58   1 0.63988-0.73555-0.71866 0.22001 0.27214-0.64074
   1   4   8 2154.90  397.25   1 0.31219-0.21728 0.75878-0.26072-0.57164 0.94064
  -1   4  -8 1603.84  597.47   1 0.72023-0.81504 0.01848 0.48027-0.69348 0.32409
   1  -4   9103287.5 4587.88   1-0.18121 0.28116 0.30821-0.80695 0.93389-0.51939
   1   4   999687.78 4616.65   1 0.76940-0.67000 0.54956-0.05053-0.32557 0.74063
  -1   4  -999806.67 4699.22   1-0.00964-0.08969-0.34951 0.84719-0.93688 0.52365
  -1  -4  -9109978.5 5006.23   1 0.63869-0.73873-0.73873 0.24004 0.21525-0.62980
   1   4   990360.35 4114.99   1 0.23718-0.13788 0.81948-0.32142-0.52171 0.93684
  -1   4  -996826.92 4434.77   1 0.72342-0.82266 0.00116 0.49763-0.69040 0.27491
   1  -4  10 6519.05  976.90   1-0.12563 0.23018 0.35628-0.85513 0.92589-0.46449
   1   4  10 2740.84  735.07   1 0.76997-0.66618 0.57289-0.07386-0.28094 0.74212
  -1   4 -10 3956.05  640.70   1 0.01647-0.12023-0.37879 0.87647-0.92533 0.46619
  -1  -4 -10 7361.15 1027.83   1 0.63529-0.73981-0.75521 0.25652 0.16137-0.62199
   1   4  10 2549.43  464.21   1 0.15829-0.05422 0.87088-0.37257-0.46529 0.92641
  -1   4 -10 2185.65  444.69   1 0.72574-0.82937-0.01203 0.51084-0.68786 0.22621
   1  -4  1111291.71 1600.28   1-0.07862 0.18765 0.39467-0.89352 0.91545-0.40791
   1   4  1113028.00 1591.98   1 0.76869-0.66050 0.59387-0.09485-0.23751 0.74481
  -1   4 -1112674.63 1931.15   1 0.03833-0.14650-0.40282 0.90050-0.91447 0.40942
  -1  -4 -11 9535.74 1210.02   1 0.63026-0.73926-0.76849 0.26980 0.11033-0.61700
   1   4  11 8317.97 1526.06   1 0.07734 0.03116 0.91210-0.41378-0.40260 0.90984
  -1   4 -1112572.58 1534.34   1 0.72728-0.83531-0.02128 0.52009-0.68600 0.17819
   1  -4  1213532.45 1076.87   1-0.03988 0.15340 0.42500-0.92386 0.90430-0.35062
  -1   4 -1211199.77 1400.14   1 0.05631-0.16890-0.42228 0.91996-0.90471 0.35374
  -1  -4 -1212743.29 1109.14   1 0.62388-0.73736-0.77906 0.28036 0.06182-0.61456
   1   4  12 7701.59 1504.11   1-0.00412 0.11652 0.94241-0.44383-0.33443 0.88850
  -1   4 -1212064.40  988.91   1 0.72816-0.84059-0.02679 0.52560-0.68487 0.13089
  -1   4 -1324438.89 2321.97   1 0.07082-0.18782-0.43777 0.93545-0.89629 0.29941
  -1  -4 -1318242.12 1581.77   1 0.61637-0.73433-0.78729 0.28860 0.01558-0.61438
  -1   4 -1324204.32 2041.39   1 0.72848-0.84530-0.02877 0.52758-0.68446 0.08431
   1   4  14  771.78  531.34   1 0.75590-0.63450 0.64472-0.14561-0.11370 0.75907
  -1   4 -14 1207.35  346.83   1 0.08222-0.20364-0.44981 0.94749-0.88932 0.24653
  -1  -4 -14 -390.96  473.93   1 0.60814-0.73055-0.79330 0.29441-0.02865-0.61611
  -1   4 -14 1280.41  607.56   1 0.72826-0.84948-0.02739 0.52620-0.68475 0.03843
  -1   4 -15 4424.61 1072.95   1 0.09086-0.21670-0.45885 0.95653-0.88385 0.19514
  -1  -4 -15 4832.66 1071.09   1 0.59880-0.72570-0.79772 0.29883-0.07111-0.61971
  -1   4 -15 2879.37  745.98   1 0.72752-0.85315-0.02281 0.52161-0.68569-0.00677
   1   4  16 6826.30  768.98   1 0.74088-0.61066 0.67069-0.17158-0.03550 0.77307
  -1   4 -16 8015.70 1353.11   1 0.09702-0.22727-0.46526 0.96294-0.87983 0.14522
  -1  -4 -16 9823.47  885.74   1 0.58870-0.72008-0.80055 0.30166-0.11199-0.62488
  -1   4 -1611093.60  821.96   1 0.72626-0.85628-0.01513 0.51394-0.68724-0.05139
  -1   5  14  845.68  548.00   1 0.73925-0.73735 0.67283-0.04894-0.02836 0.67373
   1   5 -14 1050.28  394.64   1-0.02563 0.02297-0.33066 0.95390-0.94340 0.29923
   1  -5 -14  228.82  486.45   1 0.63081-0.63380-0.76734 0.14397 0.11511-0.75997
   1   5 -14  426.68  468.77   1 0.73228-0.73418-0.05466 0.67817-0.67879 0.03248
  -1   5  13 1640.09  738.30   1 0.74656-0.74907 0.66240-0.03851-0.06209 0.66136
   1   5 -13 2079.07  553.19   1-0.04170 0.04349-0.31213 0.93537-0.94912 0.35096
   1  -5 -13  845.44  445.81   1 0.63545-0.63396-0.75466 0.13129 0.16333-0.76213
  -1   5  13 1445.50  430.87   1 0.01307-0.01519 0.93669-0.31379-0.34990 0.94936
   1   5 -13 2542.69  722.64   1 0.73240-0.72990-0.05552 0.67903-0.67859 0.07845
  -1   5  12 4803.57  994.12   1 0.75300-0.75991 0.65092-0.02704-0.09628 0.64945
   1   5 -12 3275.29  729.26   1-0.06113 0.06737-0.28942 0.91267-0.95524 0.40310
   1  -5 -12 2844.81  693.33   1 0.63859-0.63262-0.73948 0.11612 0.21296-0.76570
  -1   5  12 3428.37  683.42   1 0.07420-0.08075 0.91346-0.29057-0.40008 0.95343
   1   5 -12 4509.04  830.96   1 0.73213-0.72523-0.05353 0.67704-0.67905 0.12507
  -1  -5  1150640.70 3894.35   1-0.24781 0.23723 0.24767-0.87110 0.93661-0.43000
  -1   5  1150946.42 4095.78   1 0.75853-0.76984 0.63833-0.01444-0.13099 0.63806
   1   5 -1149713.01 3873.37   1-0.08419 0.09488-0.26205 0.88529-0.96137 0.45524
   1  -5 -1148819.90 3860.35   1 0.63982-0.62949-0.72177 0.09846 0.26392-0.77073
  -1   5  1140298.78 3952.30   1 0.13409-0.14508 0.88443-0.26153-0.44698 0.95422
   1   5 -1153981.84 4290.94   1 0.73143-0.72014-0.04856 0.67207-0.68017 0.17235
  -1  -5  10 3153.62  536.72   1-0.28150 0.26646 0.21554-0.83896 0.93503-0.47448
  -1   5  10 3074.98  797.25   1 0.76286-0.77863 0.62480-0.00102-0.16629 0.62747
   1   5 -10 2952.93  563.46   1-0.11108 0.12622-0.22951 0.85275-0.96694 0.50682
   1  -5 -10 2716.17  594.90   1 0.63932-0.62449-0.70081 0.07749 0.31642-0.77717
  -1   5  10 1523.04  463.05   1 0.19227-0.20769 0.85006-0.22717-0.49032 0.95144
   1   5 -10 2216.01  481.05   1 0.73026-0.71456-0.04045 0.66396-0.68196 0.22031
  -1   5   916591.58 1472.40   1 0.76638-0.78655 0.60970 0.01408-0.20230 0.61736
   1   5  -915820.33 1176.12   1-0.14195 0.16154-0.19134 0.81458-0.97120 0.55709
   1  -5  -917565.07 1343.90   1 0.63660-0.61729-0.67648 0.05316 0.37026-0.78493
  -1   5   912868.22 1164.28   1 0.24843-0.26866 0.81113-0.18856-0.52947 0.94459
   1   5  -916859.93 1407.98   1 0.72851-0.70842-0.02903 0.65254-0.68440 0.26892
  -1   5   819270.15 1575.83   1 0.76877-0.79334 0.59316 0.03062-0.23905 0.60799
   1   5  -818858.99 1401.07   1 0.35667-0.33213-0.13890 0.76322-0.92384 0.55423
   1  -5  -819374.33 1511.74   1 0.63136-0.60756-0.64846 0.02514 0.42527-0.79387
  -1   5   819500.06 1641.82   1 0.30179-0.32641 0.76792-0.14535-0.56498 0.93398
   1   5  -820681.80 1698.06   1 0.72608-0.70160-0.01410 0.63760-0.68745 0.31813
  -1   5   713943.21 1657.24   1 0.76993-0.79890 0.57503 0.04874-0.27665 0.59947
   1   5  -714694.82 1609.70   1 0.39811-0.36916-0.09452 0.71885-0.91245 0.58903
   1  -5  -710542.91 1252.55   1 0.62327-0.59498-0.61642-0.00689 0.48118-0.80370
  -1  -5   712559.53 1408.36   1 0.21562-0.24382 0.09732-0.72071 0.97161-0.64893
  -1   5   715631.78 2130.45   1 0.35210-0.38111 0.72137-0.09880-0.59635 0.91923
   1   5  -716883.09 1994.89   1 0.72281-0.69393 0.00453 0.61897-0.69102 0.36786
  -1   5   613408.11 1690.86   1 0.76971-0.80309 0.55515 0.06862-0.31518 0.59189
   1   5  -613310.27 1613.41   1 0.44045-0.40710-0.04701 0.67133-0.89654 0.61933
   1  -5  -623570.31 1515.96   1 0.61196-0.57955-0.58048-0.04266 0.53715-0.81381
  -1  -5   625570.50 1587.65   1 0.25760-0.29031 0.04089-0.66428 0.96538-0.68879
  -1   5   614559.29 1811.97   1 0.39937-0.43275 0.67229-0.04923-0.62331 0.90016
   1   5  -614651.81 1879.81   1 0.71857-0.68522 0.02692 0.59651-0.69492 0.41788
  -1   5   518897.20 1926.69   1 0.76794-0.80572 0.53330 0.09047-0.35475 0.58534
   1   5  -518936.89 1880.86   1 0.48262-0.44486 0.00278 0.62153-0.87582 0.64481
   1  -5  -515238.30 1562.24   1 0.59710-0.56013-0.53951-0.08363 0.59362-0.82416
  -1  -5   515196.67 1536.07   1 0.30204-0.33926-0.02106-0.60232 0.95305-0.72257
  -1   5   522572.92 1209.40   1 0.44257-0.48035 0.62156 0.00149-0.64636 0.87707
   1   5  -521756.62 2661.19   1 0.71296-0.67523 0.05355 0.56989-0.69914 0.46828
  -1   5   434724.83 1714.89   1 0.76438-0.80661 0.50930 0.11465-0.39537 0.57985
   1   5  -437644.83 1813.31   1 0.52408-0.48173 0.05370 0.57059-0.84997 0.66509
   1  -5  -429855.82 1469.61   1 0.57837-0.53684-0.49388-0.12926 0.64927-0.83371
  -1  -5   431656.83 1507.37   1 0.34785-0.38931-0.08728-0.53609 0.93347-0.74902
  -1   5   439725.66 1999.56   1 0.48192-0.52409 0.57003 0.05302-0.66543 0.85000
   1   5  -435525.45 1793.60   1 0.70577-0.66365 0.08443 0.53900-0.70338 0.51869
  -1   5   320707.76 2292.41   1 0.75879-0.80540 0.48270 0.14124-0.43728 0.57564
   1   5  -321716.32 2423.70   1 0.56280-0.51610 0.10510 0.51920-0.81987 0.68122
   1  -5  -326373.25 1093.81   1 0.55542-0.50937-0.44373-0.17949 0.70327-0.84161
  -1  -5   327434.36  973.53   1 0.39354-0.43959-0.15678-0.46659 0.90583-0.76749
  -1   5   319758.39 2204.74   1 0.51734-0.56390 0.51856 0.10449-0.68077 0.81919
   1   5  -321368.64 2448.48   1 0.69665-0.65013 0.11970 0.50374-0.70734 0.56882
  -1   5   212807.52 1459.45   1 0.75082-0.80181 0.45326 0.17068-0.48042 0.57267
   1   5  -212692.94 1452.62   1 0.59857-0.54751 0.15578 0.46852-0.78577 0.69333
   1  -5  -213878.35 1565.91   1 0.52845-0.47782-0.38921-0.23401 0.75448-0.84670
  -1  -5   215684.06 1742.00   1 0.43763-0.48825-0.22739-0.39598 0.86992-0.77769
  -1   5   212715.33 1463.15   1 0.54905-0.60003 0.46800 0.15525-0.69246 0.78476
   1   5  -211394.12 1340.12   1 0.68520-0.63429 0.15941 0.46402-0.71069 0.61834
  -1   5   1 3478.44  571.49   1 0.74006-0.79544 0.42061 0.20333-0.52477 0.57089
   1   5  -1 3646.46  594.75   1 0.63078-0.57539 0.20484 0.41917-0.74842 0.70228
  -1  -5   1 4448.68  581.57   1 0.47842-0.53363-0.29700-0.32623 0.82637-0.78026
   1  -5  -1 4420.90  646.78   1 0.49748-0.44228-0.33103-0.29220 0.80182-0.84794
  -1   5   1 2549.43  473.93   1 0.57675-0.63212 0.41895 0.20429-0.70130 0.74745
   1   5  -1 2537.58  468.55   1 0.67098-0.61568 0.20356 0.41987-0.71298 0.66680
  -1   5   068255.77 2208.21   1 0.72603-0.78580 0.38438 0.23956-0.57018 0.57018
   1   5   067379.22 2239.82   1 0.65928-0.59952 0.25172 0.37228-0.70850 0.70850
  -1  -5   068558.24 2176.04   1 0.51524-0.57502-0.36390-0.25932 0.77594-0.77594
   1  -5   069382.71 2242.05   1 0.46310-0.40334-0.27015-0.35322 0.84412-0.84412
  -1   5   070327.10 2374.44   1 0.60085-0.66060 0.37209 0.25116-0.70747 0.70747
   1   5   066539.25 2265.02   1 0.65352-0.59383 0.25201 0.37143-0.71372 0.71372
  -1   5  -127638.88 1021.99   1 0.70820-0.77233 0.34422 0.27978-0.61640 0.57027
   1   5   131096.85 1251.16   1 0.68397-0.61983 0.29600 0.32801-0.66674 0.71288
  -1  -5  -124248.55  907.69   1 0.54709-0.61145-0.42643-0.19679 0.72030-0.76641
   1  -5   126840.84 1042.59   1 0.42554-0.36120-0.20763-0.41574 0.88079-0.83468
  -1   5  -129648.13 1201.74   1 0.62159-0.68572 0.32792 0.29533-0.71139 0.66524
   1   5   129122.94 1155.83   1 0.63189-0.56776 0.30439 0.31886-0.71277 0.75892
   1   5   212954.31 1507.93   1 0.70496-0.63645 0.33743 0.28657-0.62382 0.71609
  -1   5  -213971.54 1569.87   1 0.68603-0.75454 0.29989 0.32412-0.66288 0.57061
  -1  -5  -217199.82 1915.63   1 0.57381-0.64268-0.48345-0.13969 0.66106-0.75328
   1  -5   214690.75 1647.77   1 0.38587-0.31695-0.14486-0.47851 0.91110-0.81887
   1   5   213478.29 1581.48   1 0.60647-0.53795 0.36050 0.26275-0.70867 0.80097
  -1   5  -214270.16 1687.34   1 0.63925-0.70777 0.28684 0.33641-0.71349 0.62119
   1   5   319098.14 2177.91   1 0.72246-0.64958 0.37593 0.24807-0.58026 0.71867
  -1   5  -318835.43 2075.36   1 0.65907-0.73196 0.25137 0.37264-0.70881 0.57040
  -1  -5  -317947.39 2000.75   1 0.59518-0.66861-0.53457-0.08857 0.59999-0.73831
   1  -5   318049.55 1807.38   1 0.34510-0.27161-0.08321-0.54016 0.93486-0.79652
   1   5   318652.23 2092.14   1 0.57640-0.50350 0.41960 0.20364-0.70120 0.83965
  -1   5  -319530.91 1993.09   1 0.65455-0.72741 0.24928 0.37416-0.71372 0.57520
   1   5   444084.58 2190.43   1 0.73670-0.65938 0.41142 0.21252-0.53665 0.72114
  -1   5  -438869.47 1804.45   1 0.62693-0.70413 0.19874 0.42555-0.75329 0.56841
  -1  -5  -431572.76 1543.42   1 0.61168-0.68967-0.57964-0.04350 0.53837-0.72281
   1  -5   435976.71 1730.65   1 0.30425-0.22651-0.02420-0.59918 0.95228-0.76789
   1   5   443638.27 2115.21   1 0.54131-0.46402 0.48091 0.14234-0.68971 0.87431
  -1   5  -440466.16 1985.53   1 0.66697-0.74422 0.21518 0.40825-0.71332 0.52863
   1   5   516555.75 1229.68   1 0.74803-0.66633 0.44422 0.17973-0.49306 0.72367
  -1   5  -515523.52 1684.19   1 0.58987-0.67142 0.14313 0.48117-0.79470 0.56361
  -1  -5  -518740.46 1212.05   1 0.62385-0.70605-0.61849-0.00482 0.47776-0.70813
   1  -5   519650.49 1269.39   1 0.26442-0.18219 0.03153-0.65492 0.96389-0.73340
   1   5   515440.15 1756.36   1 0.50067-0.41896 0.54343 0.07962-0.67379 0.90450
  -1   5  -514149.30 1745.18   1 0.67723-0.75887 0.18476 0.43867-0.71219 0.48132
   1   5   649384.05 3040.81   1 0.75671-0.67062 0.47437 0.14958-0.44982 0.72655
  -1   5  -646459.82 2762.14   1 0.54843-0.63433 0.08563 0.53866-0.83179 0.55448
  -1  -5  -642217.36 2572.28   1 0.63220-0.71889-0.65233 0.02901 0.41806-0.69451
   1  -5   642950.64 2603.90   1 0.22641-0.13967 0.08300-0.70639 0.97048-0.69390
   1   5   648990.71 2972.61   1 0.45485-0.36874 0.60607 0.01698-0.65252 0.92937
  -1   5  -648079.46 2966.27   1 0.68561-0.77164 0.15805 0.46539-0.71059 0.43355
   1   5   743096.26 2879.79   1 0.76302-0.67255 0.50205 0.12189-0.40709 0.72994
  -1   5  -740501.19 2592.88   1 0.50370-0.59397 0.02788 0.59641-0.86342 0.53989
  -1  -5  -741562.95 2741.40   1 0.63729-0.72847-0.68131 0.05799 0.36009-0.68261
   1  -5   743167.15 2820.34   1 0.19088-0.09964 0.12970-0.75309 0.97300-0.65032
   1   5   740731.65 2650.29   1 0.40362-0.31313 0.66754-0.04448-0.62567 0.94866
  -1   5  -739334.52 2656.57   1 0.69238-0.78280 0.13502 0.48841-0.70878 0.38556
   1   5   8 1334.78  660.30   1 0.76721-0.67221 0.52733 0.09644-0.36510 0.73404
  -1   5  -8  998.54  298.81   1-0.15815 0.06289-0.17094 0.79418-0.97250 0.60440
  -1  -5  -8  909.32  493.79   1 0.63962-0.73529-0.70598 0.08266 0.30408-0.67268
   1   5   8  514.90  210.11   1 0.34679-0.25189 0.72656-0.10399-0.59315 0.96215
  -1   5  -8  718.45  440.37   1 0.69776-0.79257 0.11561 0.50782-0.70693 0.33755
   1   5   9 3529.93  688.76   1 0.76946-0.67007 0.55062 0.07315-0.32362 0.73868
  -1   5  -9 4803.45  728.64   1-0.12879 0.02908-0.20772 0.83096-0.96967 0.55556
  -1  -5  -9 2322.37  450.53   1 0.63981-0.73985-0.72664 0.10327 0.25023-0.66479
   1   5   9 2766.38  708.00   1 0.28554-0.18624 0.78173-0.15915-0.55440 0.96952
  -1   5  -9 3788.47  655.89   1 0.70194-0.80114 0.09973 0.52370-0.70521 0.28965
   1   5  1011045.10 1027.01   1 0.76999-0.66619 0.57195 0.05182-0.28279 0.74397
  -1   5 -10 9811.39 1750.86   1-0.10271-0.00144-0.23971 0.86295-0.96539 0.50527
  -1  -5 -1014392.79 1203.30   1 0.63784-0.74236-0.74416 0.12079 0.19840-0.65901
   1   5  10 8775.87 1718.61   1 0.21999-0.11630 0.83175-0.20918-0.50968 0.97093
  -1   5 -1013139.05 1200.61   1 0.70508-0.80867 0.08726 0.53617-0.70373 0.24200
   1   5  11 2830.94  620.14   1 0.76894-0.66074 0.59149 0.03228-0.24262 0.74991
  -1   5 -11 4549.58 1118.31   1-0.07989-0.02871-0.26719 0.89044-0.96032 0.45419
  -1  -5 -11 5499.57 1061.38   1 0.63419-0.74319-0.75876 0.13539 0.14855-0.65523
   1   5  11 2698.35  626.81   1 0.15052-0.04202 0.87535-0.25245-0.45945 0.96669
  -1   5 -11 5081.65 1022.11   1 0.70731-0.81529 0.07810 0.54534-0.70257 0.19466
   1   5  1212564.67 1168.19   1 0.76644-0.65384 0.60936 0.01441-0.20307 0.75649
  -1   5 -1212265.41 1872.95   1-0.06022-0.05283-0.29050 0.91374-0.95497 0.40283
  -1  -5 -1213922.71 1076.05   1 0.62911-0.74258-0.77077 0.14741 0.10059-0.65332
  -1   5 -1214692.05 1176.95   1 0.70873-0.82110 0.07211 0.55133-0.70177 0.14769
   1   5  13 3853.86  926.95   1 0.76261-0.64561 0.62568-0.00190-0.16413 0.76366
  -1   5 -13 4986.76 1234.92   1-0.04355-0.07395-0.30998 0.93322-0.94974 0.35158
  -1  -5 -13 3479.46  803.28   1 0.62277-0.74072-0.78051 0.15714 0.05437-0.65317
  -1   5 -13 5128.67 1146.35   1 0.70942-0.82618 0.06919 0.55425-0.70138 0.10112
   1   5  14 7145.96  774.09   1 0.75777-0.63636 0.64026-0.01637-0.12584 0.77121
  -1   5 -14 6970.87 1501.67   1-0.02970-0.09225-0.32599 0.94923-0.94490 0.30073
  -1  -5 -14 8976.88  904.76   1 0.61533-0.73776-0.78820 0.16483 0.00976-0.65462
  -1   5 -14 9079.83  799.39   1 0.70941-0.83056 0.06923 0.55420-0.70138 0.05496
  -1   6  11  500.10  469.75   1 0.75741-0.76872 0.64117 0.10749-0.12340 0.63048
   1  -6 -11 1180.12  470.58   1 0.63987-0.62954-0.71962-0.02835 0.26963-0.77644
  -1  -6  11 1389.77  424.48   1 0.20573-0.21593 0.11034-0.85841 0.97236-0.46529
  -1   6  11  321.94  181.90   1 0.16451-0.17550 0.86723-0.11976-0.46992 0.97716
   1   6 -11 1674.63  693.34   1 0.71143-0.70004 0.06039 0.68773-0.70014 0.19224
  -1   6  10 1448.51  513.30   1 0.76167-0.77745 0.62882 0.11970-0.15626 0.61744
   1  -6 -10 4349.60  972.40   1 0.63924-0.62442-0.69978-0.04820 0.31885-0.77959
  -1  -6  10 4833.73  982.44   1 0.23095-0.24565 0.07693-0.82500 0.96991-0.50894
  -1   6  10 2774.17  842.55   1 0.21679-0.23263 0.83397-0.08688-0.50742 0.96867
   1   6 -10 4823.49 1061.98   1 0.70948-0.69370 0.06889 0.67923-0.70134 0.23960
  -1   6   924654.79 2100.12   1 0.76524-0.78542 0.61524 0.13329-0.18937 0.60443
   1  -6  -931209.81 2610.77   1 0.63670-0.61739-0.67719-0.07078 0.36879-0.78346
  -1  -6   931132.20 2497.31   1 0.25877-0.27797 0.03929-0.78736 0.96513-0.55026
  -1   6   923092.32 2342.83   1 0.26632-0.28655 0.79731-0.05023-0.54162 0.95674
   1   6  -926223.65 2301.50   1 0.70678-0.68661 0.08028 0.66785-0.70285 0.28729
  -1   6   813532.61 1085.92   1 0.76786-0.79244 0.60061 0.14792-0.22279 0.59173
   1  -6  -8 8593.08 1723.36   1 0.63206-0.60826-0.65168-0.09629 0.41928-0.78787
  -1  -6   8 9068.23  682.02   1 0.28892-0.31262-0.00251-0.74555 0.95734-0.58856
  -1   6   811525.31 1288.87   1 0.31306-0.33768 0.75801-0.01092-0.57219 0.94119
   1   6  -811647.54 1072.62   1 0.70323-0.67866 0.09466 0.65347-0.70462 0.33524
  -1   6   7 7350.32 1545.73   1 0.76947-0.79845 0.58487 0.16366-0.25655 0.57938
   1  -6  -7 8474.77 1619.75   1 0.62512-0.59682-0.62309-0.12488 0.47007-0.79259
  -1  -6   7 7396.32 1395.56   1 0.32102-0.34922-0.04827-0.69979 0.94584-0.62315
  -1   6   7 5282.83 1073.66   1 0.35682-0.38584 0.71669 0.03039-0.59918 0.92206
   1   6  -7 5823.76 1234.51   1 0.69869-0.66973 0.11214 0.63599-0.70657 0.38336
  -1   6   617858.43 1516.19   1 0.77001-0.80339 0.56795 0.18058-0.29069 0.56739
   1   6  -618912.94 1527.21   1 0.55623-0.52259 0.09613 0.65302-0.82544 0.54813
   1  -6  -615772.80 1363.63   1 0.61564-0.58323-0.59165-0.15612 0.52050-0.79715
  -1  -6   616366.93 1368.58   1 0.35453-0.38685-0.09724-0.65081 0.92997-0.65328
  -1   6   618839.14 1642.01   1 0.39776-0.43115 0.67407 0.07359-0.62241 0.89927
   1   6  -616884.70 1497.98   1 0.69301-0.65966 0.13281 0.61531-0.70858 0.43154
  -1   6   510293.64 1743.97   1 0.76941-0.80719 0.54975 0.19878-0.32522 0.55580
   1   6  -511969.25  969.33   1 0.58394-0.54595 0.13462 0.61453-0.80055 0.56945
   1  -6  -5 7770.79 1252.35   1 0.60352-0.56656-0.55654-0.19123 0.57097-0.80152
  -1  -6   5 8356.35 1255.35   1 0.38882-0.42571-0.14943-0.59862 0.90911-0.67854
  -1   6   511806.86 1073.23   1 0.43518-0.47296 0.63065 0.11701-0.64256 0.87327
   1   6  -510570.14 1802.71   1 0.68600-0.64826 0.15678 0.59135-0.71050 0.47963
  -1   6   4 2614.11  506.25   1 0.76757-0.80975 0.53020 0.21833-0.36016 0.54463
   1   6  -4 1696.12  354.90   1 0.61039-0.56804 0.17335 0.57581-0.77289 0.58801
   1  -6  -4 3861.13  730.74   1 0.58859-0.54707-0.51815-0.22962 0.62053-0.80497
  -1  -6   4 3894.31  649.24   1 0.42309-0.46455-0.20366-0.54438 0.88290-0.69844
  -1   6   4 2275.69  576.22   1 0.46935-0.51152 0.58709 0.16057-0.65956 0.84412
   1   6  -4 2458.05  577.11   1 0.67745-0.63532 0.18409 0.56404-0.71215 0.52746
  -1   6   3 3036.31  569.07   1 0.76438-0.81098 0.50926 0.23948-0.39543 0.53380
   1   6  -3 3216.30  577.19   1 0.63516-0.58852 0.21179 0.53702-0.74277 0.60436
   1  -6  -3 1805.07  520.33   1 0.57077-0.52468-0.47661-0.27116 0.66862-0.80695
  -1  -6   3  992.78  353.08   1 0.45650-0.50254-0.25891-0.48914 0.85121-0.71287
  -1   6   3 2730.32  527.13   1 0.50030-0.54687 0.54397 0.20369-0.67363 0.81205
   1   6  -3 4904.99  809.45   1 0.66711-0.62059 0.21478 0.53335-0.71331 0.57479
  -1   6   248892.38 3342.95   1 0.75973-0.81072 0.48666 0.26208-0.43124 0.52348
   1   6  -254277.67 3699.67   1 0.65795-0.60693 0.24945 0.49936-0.71054 0.61826
   1  -6  -260884.31 8672.79   1 0.54991-0.49929-0.43224-0.31563 0.71467-0.80689
  -1  -6   260392.74 8592.51   1 0.48799-0.53862-0.31394-0.43393 0.81443-0.72220
  -1   6   255704.25 3863.43   1 0.52810-0.57906 0.50181 0.24585-0.68504 0.77732
   1   6  -252156.21 3613.98   1 0.65472-0.60381 0.24884 0.49928-0.71373 0.62138
  -1   6   1 2542.88  531.96   1 0.75347-0.80885 0.46236 0.28637-0.46743 0.51355
   1   6  -1 1557.36  347.57   1 0.67859-0.62320 0.28600 0.46281-0.67654 0.63040
  -1  -6   1 3035.87  505.53   1 0.51738-0.57258-0.36795-0.37992 0.77260-0.72649
   1  -6  -1 2800.59  493.86   1 0.52642-0.47122-0.38527-0.36260 0.75791-0.80403
  -1   6   1 2115.41  541.52   1 0.55306-0.60843 0.46118 0.28672-0.69384 0.73999
   1   6  -1 3045.33  707.60   1 0.63957-0.58421 0.28605 0.46185-0.71352 0.66737
  -1   6   0 2343.59  447.29   1 0.74545-0.80522 0.43626 0.31248-0.50395 0.50395
   1   6   0 1224.22  541.45   1 0.69698-0.63721 0.32116 0.42765-0.64114 0.64114
  -1  -6   0 2083.90  532.66   1 0.54384-0.60362-0.41980-0.32808 0.72663-0.72663
   1  -6   0 2755.97  594.52   1 0.50039-0.44061-0.33633-0.41154 0.79780-0.79780
  -1   6   0 2293.84  681.88   1 0.57496-0.63471 0.42227 0.32563-0.70078 0.70078
   1   6   0 2237.78  622.25   1 0.62216-0.56241 0.32663 0.42127-0.71148 0.71148
  -1   6  -115400.24 1166.65   1 0.73551-0.79966 0.40825 0.34048-0.54069 0.49457
   1   6   115130.78 1222.77   1 0.71309-0.64895 0.35475 0.39406-0.60468 0.65082
  -1  -6  -115938.06 1178.70   1 0.56716-0.63147-0.46862-0.27915 0.67728-0.72339
   1  -6   118145.38 1375.20   1 0.47217-0.40782-0.28609-0.46179 0.83378-0.78767
  -1   6  -113893.41 1119.38   1 0.59417-0.65831 0.38552 0.36238-0.70592 0.65977
   1   6   115365.53 1198.42   1 0.60178-0.53765 0.37019 0.37771-0.70767 0.75382
  -1   6  -2 3677.88  556.91   1 0.72345-0.79196 0.37825 0.37056-0.57752 0.48525
   1   6   2 3058.85  622.39   1 0.72693-0.65839 0.38656 0.36217-0.56756 0.65980
  -1  -6  -2 2727.16  504.39   1 0.58686-0.65574-0.51395-0.23382 0.62564-0.71786
   1  -6   2 4777.99  721.48   1 0.44249-0.37357-0.23543-0.51261 0.86531-0.77308
   1   6   2 3579.35  741.03   1 0.57812-0.50960 0.41641 0.33148-0.70169 0.79399
  -1   6  -2 3079.84  683.64   1 0.61090-0.67942 0.35119 0.39671-0.70955 0.61725
   1   6   313018.98 1119.16   1 0.73864-0.66571 0.41668 0.33206-0.52989 0.66825
  -1   6  -310801.20 1595.58   1 0.70915-0.78203 0.34625 0.40256-0.61417 0.47576
  -1  -6  -3 7199.75 1001.64   1 0.60311-0.67654-0.55541-0.19236 0.57250-0.71083
   1  -6   3 6178.01  849.73   1 0.41143-0.33793-0.18495-0.56309 0.89247-0.75413
   1   6   311376.03  977.13   1 0.55087-0.47796 0.46492 0.28298-0.69309 0.83154
  -1   6  -313251.74 1156.39   1 0.62534-0.69824 0.31948 0.42842-0.71195 0.57350
   1   6   430878.32 2250.66   1 0.74828-0.67097 0.44503 0.30371-0.49194 0.67642
  -1  -6  -430413.55 2135.77   1 0.61603-0.69402-0.59287-0.15490 0.51865-0.70308
   1  -6   432510.23 2269.63   1 0.37983-0.30176-0.13556-0.61249 0.91506-0.73061
   1   6   429907.25 2134.47   1 0.51955-0.44223 0.51516 0.23251-0.68166 0.86623
  -1   6  -430166.07 2182.43   1 0.63771-0.71500 0.29055 0.45734-0.71336 0.52876
   1   6   5 1891.79  664.92   1 0.75600-0.67430 0.47163 0.27710-0.45388 0.68449
  -1  -6  -5 1267.31  468.43   1 0.62590-0.70810-0.62602-0.12196 0.46512-0.69549
   1  -6   5 1286.66  378.90   1 0.34833-0.26568-0.08799-0.66005 0.93323-0.70266
   1   6   5  862.01  362.37   1 0.48437-0.40266 0.56664 0.18103-0.66655 0.89726
  -1   6  -5  471.08  399.55   1 0.64822-0.72989 0.26450 0.48340-0.71403 0.48328
   1   6   6 3313.38  734.58   1 0.76191-0.67582 0.49654 0.25219-0.41584 0.69257
  -1  -6  -6 5393.29  984.95   1 0.63289-0.71958-0.65564-0.09233 0.41179-0.68824
   1  -6   6 4253.65  797.98   1 0.31746-0.23073-0.04314-0.70492 0.94728-0.67070
   1   6   6 4772.55  934.85   1 0.44496-0.35885 0.61859 0.12907-0.64757 0.92442
   1   6   7 8894.32 1374.88   1 0.76612-0.67565 0.51982 0.22892-0.37793 0.70077
  -1  -6  -710983.31  927.91   1 0.63734-0.72852-0.68169-0.06628 0.35928-0.68180
   1  -6   712158.82  976.22   1 0.28783-0.19659-0.00098-0.74708 0.95767-0.63499
   1   6   7 9252.21 1339.22   1 0.40122-0.31073 0.67023 0.07743-0.62434 0.94733
  -1   6  -7 7171.60 1482.12   1 0.66476-0.75518 0.22145 0.52667-0.71347 0.39026
   1   6   8 1659.48  533.54   1 0.76877-0.67377 0.54142 0.20711-0.34037 0.70931
  -1  -6  -8  718.21  482.41   1 0.63954-0.73521-0.70442-0.04355 0.30783-0.67642
   1  -6   8 1493.99  448.02   1 0.25981-0.16406 0.03787-0.78594 0.96491-0.59613
   1   6   8  458.24  188.07   1 0.35284-0.25793 0.72064 0.02644-0.59679 0.96580
  -1   6  -8 -405.77  406.76   1 0.67075-0.76556 0.20422 0.54390-0.71300 0.34361
   1   6   925572.20 2259.05   1 0.76994-0.67054 0.56165 0.18688-0.30288 0.71794
  -1  -6  -922237.28 1882.40   1 0.63975-0.73991-0.72412-0.02385 0.25760-0.67227
   1  -6   925986.45 2143.61   1 0.23372-0.13348 0.07323-0.82129 0.96954-0.55466
   1   6   915064.38 2308.05   1 0.30054-0.20123 0.76901-0.02192-0.56417 0.97929
  -1   6  -924728.79 2165.02   1 0.67555-0.77475 0.18990 0.55822-0.71243 0.29687
   1   6  10 7299.04 1043.30   1 0.76973-0.66593 0.58046 0.16807-0.26565 0.72683
  -1  -6 -10 7084.33  924.53   1 0.63839-0.74290-0.74086-0.00717 0.20874-0.66935
   1  -6  10 7308.31  956.13   1 0.20980-0.10505 0.10500-0.85306 0.97208-0.51111
   1   6  10 3665.43  942.64   1 0.24417-0.14048 0.81432-0.06723-0.52654 0.98779
  -1   6 -10 4850.08 1129.95   1 0.67927-0.78286 0.17843 0.56970-0.71186 0.25013
   1   6  11  264.76  504.95   1 0.76822-0.66002 0.59793 0.15060-0.22869 0.73599
  -1  -6 -11 2548.58  726.83   1 0.63528-0.74427-0.75527 0.00723 0.16115-0.66783
   1  -6  11 1651.27  605.43   1 0.18818-0.07893 0.13319-0.88126 0.97305-0.46598
  -1   6 -11 1791.08  790.37   1 0.68201-0.78999 0.16976 0.57837-0.71136 0.20345
  -1   7   6 7392.60 1092.33   1 0.76916-0.80254 0.58904 0.28425-0.24782 0.52452
   1  -7  -611691.83 1438.49   1 0.62196-0.58955-0.61233-0.26007 0.48805-0.76471
  -1   7   6 5227.62 1019.31   1 0.38262-0.41603 0.69009 0.18150-0.61429 0.89105
   1   7  -6 7788.78 1276.14   1 0.66198-0.62863 0.22921 0.64360-0.71360 0.43656
  -1   7   5 4080.47  909.37   1 0.76994-0.80772 0.57453 0.29876-0.27766 0.50825
   1  -7  -5 1998.69  590.35   1 0.61268-0.57571-0.58261-0.28979 0.53402-0.76457
  -1   7   5 2855.16  695.13   1 0.41650-0.45428 0.65285 0.21943-0.63269 0.86340
   1   7  -5 3161.91  787.25   1 0.65402-0.61628 0.25069 0.62212-0.71372 0.48285
  -1   7   4 3015.54  792.05   1 0.76987-0.81205 0.55927 0.31402-0.30742 0.49189
   1  -7  -4 2196.25  620.04   1 0.60128-0.55976-0.55050-0.32190 0.57913-0.76357
  -1   7   4 2267.86  699.28   1 0.44735-0.48952 0.61559 0.25668-0.64878 0.83335
   1   7  -4 1679.87  581.57   1 0.64420-0.60199 0.27464 0.59791-0.71384 0.52924
  -1   7   3  986.95  408.69   1 0.76893-0.81551 0.54326 0.33003-0.33705 0.47541
   1  -7  -3 3168.32  820.19   1 0.58776-0.54168-0.51612-0.35628 0.62301-0.76134
  -1  -7   3 1185.89  371.92   1 0.50809-0.55414-0.35052-0.52200 0.78674-0.64840
  -1   7   3 3069.16  823.31   1 0.47546-0.52203 0.57887 0.29340-0.66244 0.80087
   1   7  -3 1858.88  657.72   1 0.63309-0.58649 0.30158 0.57097-0.71291 0.57446
   1  -7  -2 1463.75  555.09   1 0.57213-0.52149-0.47966-0.39274 0.66527-0.75749
  -1  -7   2  748.21  261.08   1 0.53096-0.58159-0.39412-0.47840 0.75015-0.65793
  -1   7   2 2417.51  704.14   1 0.50092-0.55188 0.54307 0.32920-0.67390 0.76618
   1   7  -2 1871.69  639.04   1 0.62012-0.56914 0.33119 0.54136-0.71116 0.61886
   1   7  -1 2763.00  645.08   1 0.71676-0.66137 0.36289 0.51072-0.59544 0.54930
  -1  -7   1 2258.43  501.42   1 0.55202-0.60722-0.43661-0.43591 0.71038-0.66426
  -1   7   1 3463.95  865.94   1 0.52384-0.57920 0.50850 0.36377-0.68337 0.72951
   1   7  -1 2899.57  683.73   1 0.60508-0.54972 0.36339 0.50916-0.70838 0.66223
   1   7   016309.30 1871.86   1 0.72793-0.66816 0.38900 0.48453-0.56460 0.56460
  -1  -7   018316.94 2031.01   1 0.57110-0.63086-0.47737-0.39503 0.66779-0.66779
   1  -7   019648.58 2210.85   1 0.53480-0.47502-0.40167-0.47085 0.74340-0.74340
  -1   7   017948.71 2065.71   1 0.54451-0.60426 0.47561 0.39694-0.69086 0.69086
   1   7   018016.89 2082.05   1 0.58777-0.52802 0.39807 0.47448-0.70431 0.70431
   1   7   1 3233.61  743.58   1 0.73776-0.67360 0.41429 0.45923-0.53297 0.57909
  -1  -7  -1  995.49  383.95   1 0.58773-0.65205-0.51605-0.35635 0.62310-0.66920
   1  -7   1 1261.16  386.57   1 0.51361-0.44925-0.36083-0.51169 0.77846-0.73234
  -1   7  -1 2611.82  757.02   1 0.56274-0.62687 0.44435 0.42820-0.69704 0.65089
   1   7   1 2487.48  667.09   1 0.56795-0.50381 0.43506 0.43749-0.69867 0.74482
   1   7   2  967.11  496.57   1 0.74623-0.67769 0.43864 0.43488-0.50071 0.59295
  -1  -7  -2  551.76  288.91   1 0.60195-0.67082-0.55228-0.32012 0.57674-0.66896
   1  -7   2  619.25  296.10   1 0.49104-0.42211-0.31940-0.55312 0.81046-0.71823
   1   7   2  827.61  440.23   1 0.54540-0.47688 0.47413 0.39842-0.69118 0.78348
  -1   7  -2  -72.06  411.33   1 0.57884-0.64736 0.41506 0.45749-0.70189 0.60959
   1   7   3 1149.37  521.75   1 0.75336-0.68043 0.46199 0.41153-0.46796 0.60633
  -1  -7  -3  897.61  397.12   1 0.61375-0.68718-0.58583-0.28657 0.52924-0.66757
   1  -7   3 1465.86  454.41   1 0.46744-0.39393-0.27789-0.59463 0.83921-0.70087
   1   7   3 2022.42  651.35   1 0.51971-0.44679 0.51491 0.35737-0.68173 0.82015
  -1   7  -3 1920.48  566.52   1 0.59298-0.66588 0.38789 0.48466-0.70562 0.56718
   1   7   4  424.89  373.90   1 0.75917-0.68186 0.48431 0.38922-0.43484 0.61932
  -1  -7  -4 1116.58  448.37   1 0.62326-0.70097-0.61638-0.25626 0.48125-0.66555
   1  -7   4  189.29  305.36   1 0.44342-0.36536-0.23698-0.63574 0.86441-0.67995
   1   7   4 1422.20  633.55   1 0.49106-0.41374 0.55724 0.31503-0.66957 0.85414
  -1   7  -4 1852.32  707.00   1 0.60529-0.68258 0.36297 0.50958-0.70843 0.52383
   1   7   5  985.80  533.23   1 0.76370-0.68200 0.50557 0.36796-0.40143 0.63204
   1  -7   5 1582.69  406.65   1 0.41888-0.33623-0.19687-0.67585 0.88644-0.65587
   1   7   5 1993.54  595.57   1 0.45908-0.37737 0.60061 0.27167-0.65460 0.88531
  -1   7  -5 2600.29  807.46   1 0.61593-0.69760 0.34038 0.53217-0.71047 0.47972
   1   7   6 3506.87  836.83   1 0.76698-0.68079 0.52564 0.34765-0.36801 0.64471
  -1  -7  -6 1058.76  458.27   1 0.63547-0.72216-0.66943-0.20321 0.38475-0.66119
   1  -7   6 3697.12  825.33   1 0.39444-0.30723-0.15818-0.71454 0.90520-0.62851
   1   7   6 2464.59  647.92   1 0.42361-0.33751 0.64452 0.22775-0.63650 0.91335
  -1   7  -6 5002.85  839.57   1 0.62503-0.71109 0.32019 0.55236-0.71190 0.43500
  -2   0  1911083.22 1350.84   1 0.52153-0.55615 0.71914-0.71914 0.45916 0.41656
   2   0 -1911090.15 1501.33   1 0.47506-0.44043-0.77378 0.77378-0.41901-0.45526
  -2   0  18 2295.53  585.23   1 0.53401-0.57310 0.72141-0.72141 0.44090 0.38873
   2   0 -18 4199.33  906.43   1 0.48789-0.44880-0.77991 0.77991-0.39203-0.43623
   2   0 -18 2384.91  595.99   1 0.64942-0.61060-0.65557 0.65557-0.38532-0.44428
  -2   0  1763504.03 4356.67   1 0.54563-0.58919 0.72324-0.72324 0.42331 0.36023
   2   0 -1769690.92 4818.61   1 0.50035-0.45681-0.78536 0.78536-0.36448-0.41776
   2   0 -1766385.55 4532.08   1 0.63247-0.58913-0.68698 0.68698-0.35782-0.42541
  -2   0  16 4775.56  816.38   1 0.55640-0.60442 0.72467-0.72467 0.40652 0.33092
   2   0 -16 6070.71  972.60   1 0.51248-0.46448-0.79011 0.79011-0.33627-0.39996
   2   0 -16 5392.57  786.62   1 0.61469-0.56689-0.71628 0.71628-0.33026-0.40689
  -2   0  1525480.67 1683.36   1 0.56626-0.61876 0.72575-0.72575 0.39067 0.30069
   2   0 -1525773.35 1753.71   1 0.52430-0.47185-0.79416 0.79416-0.30725-0.38296
   2   0 -1524600.31 1675.99   1 0.59598-0.54371-0.74386 0.74386-0.30243-0.38864
  -2   0  14 7637.71  974.77   1 0.57519-0.63215 0.72651-0.72651 0.37592 0.26934
   2   0 -14 6418.58  824.75   1 0.53585-0.47894-0.79748 0.79748-0.27727-0.36692
   2   0 -14 6603.39  818.41   1 0.57633-0.51959-0.76980 0.76980-0.27429-0.37071
  -2   0  1389269.67 3254.29   1 0.58310-0.64453 0.72702-0.72702 0.36252 0.23665
   2   0 -1389395.39 3272.75   1 0.54750-0.48638-0.79964 0.79964-0.24658-0.35213
   2   0 -1386439.82 3161.21   1 0.55573-0.49451-0.79419 0.79419-0.24579-0.35314
  -2   0  12 8793.27  897.04   1 0.58988-0.65578 0.72732-0.72732 0.35075 0.20233
   2   0 -1211620.82 1097.08   1 0.55865-0.49305-0.80133 0.80133-0.21391-0.33875
   2   0 -1210205.54 1006.74   1 0.53412-0.46843-0.81711 0.81711-0.21687-0.33599
  -2   0  11229736.9 5717.12   1 0.59529-0.66572 0.72750-0.72750 0.34112 0.16599
   2   0 -11242432.319433.12   1 0.56963-0.49955-0.80208 0.80208-0.17935-0.32725
   2   0 -11246087.519726.53   1 0.51153-0.44141-0.83855 0.83855-0.18750-0.31934
  -2   0  10 7203.59  723.37   1 0.59928-0.67418 0.72755-0.72755 0.33395 0.12707
   2   0 -10 9421.60  987.34   1 0.58049-0.50593-0.80172 0.80172-0.14233-0.31822
   2   0 -10 9939.77  996.19   1 0.48771-0.41311-0.85868 0.85868-0.15746-0.30331
  -2   0   9 7929.58  808.11   1 0.60142-0.68078 0.72755-0.72755 0.33008 0.08484
   2   0  -9 9256.42  914.97   1 0.59126-0.51222-0.79999 0.79999-0.10203-0.31246
   2   0  -9 8731.78  901.16   1 0.46260-0.38352-0.87746 0.87746-0.12667-0.28802
  -2   0   8182349.0 1837.42   1 0.60115-0.68497 0.72755-0.72755 0.33056 0.03825
   2   0  -8185257.5 1924.01   1 0.43601-0.35244-0.89491 0.89491-0.09494-0.27367
  -2   0   768146.95 1805.54   1 0.59763-0.68592 0.72753-0.72753 0.33693-0.01421
   2   0  -757250.00 2515.47   1-0.14078 0.22964 0.96696-0.96695-0.21252-0.11068
   2   0  -767617.86 1844.02   1 0.40766-0.31961-0.91102 0.91102-0.06201-0.26053
  -2   0   623926.99 1128.32   1 0.58948-0.68220 0.72731-0.72731 0.35145-0.07490
   2   0  -624358.10 1103.18   1 0.70792-0.61483 0.70123-0.70123 0.08429-0.36088
  -2   0   621976.25 1010.67   1 0.63684-0.72937-0.67811 0.67811 0.36686-0.09041
   2   0  -620867.89 1861.96   1-0.14936 0.24260 0.96740-0.96740-0.20448-0.07255
   2   0  -623068.90 1113.57   1 0.37713-0.28461-0.92574 0.92574-0.02750-0.24896
  -2   0   5512900.4 4183.67   1 0.57406-0.67125 0.72643-0.72643 0.37781-0.14735
  -2   0   5492955.4 3987.60   1 0.63384-0.73086-0.66044 0.66044 0.40255-0.17218
  -2   0   4101994.5 2554.51   1 0.54671-0.64837 0.72339-0.72339 0.42165-0.23729
   2   0  -497787.15 2446.25   1 0.64819-0.54651 0.72359-0.72359 0.23717-0.42158
   2   0  -4123130.5 3064.06   1 0.63934-0.53782-0.73301 0.73301 0.23220-0.41645
  -2   0   4113125.5 2808.16   1 0.62594-0.72745-0.62616 0.62616 0.46487-0.28058
   2   0  -352302.37 2247.29   1 0.59299-0.48684 0.72745-0.72745 0.34521-0.48352
   2   0  -355039.38 2367.71   1 0.63602-0.53001-0.67274 0.67274 0.37800-0.51623
  -2   0   354525.80 2338.85   1 0.60342-0.70926-0.55626 0.55626 0.57135-0.43303
  -2   0   252391.07 2243.60   1 0.40798-0.51857 0.68644-0.68644 0.60195-0.50977
   2   0  -250620.71 2169.32   1 0.50074-0.39014 0.71470-0.71470 0.48832-0.58050
   2   0  -252776.85 2252.77   1 0.59510-0.48470-0.53438 0.53438 0.60023-0.69245
   2   0  -246903.19 2023.64   1-0.10830 0.21909 0.96407-0.96407-0.24256 0.15021
   2   0  -139261.01 1679.95   1 0.33682-0.22176 0.65722-0.65722 0.67424-0.72033
   2   0  -140425.48 1724.46   1 0.42144-0.30648-0.20101 0.20101 0.88429-0.93040
  -2   0   143025.44 1857.23   1-0.14896 0.03379 0.96738-0.96738-0.20485 0.25102
   2   0  -137917.12 1645.22   1-0.05099 0.16616 0.95446-0.95446-0.29393 0.24775
  -2   0   0 2247.43  269.21   1-0.05976-0.05976 0.40958-0.40958 0.91031-0.91031
   2   0   0 1359.97  185.40   1 0.05976 0.05976 0.49773-0.49773 0.86526-0.86526
  -2   0   0 1315.87  188.84   1-0.05965-0.05965-0.29117 0.29117-0.95480 0.95480
   2   0   0 1237.35  180.67   1 0.05958 0.05958-0.42579 0.42579-0.90285 0.90285
  -2   0   0 1718.33  251.03   1-0.05977-0.05977 0.95630-0.95630-0.28619 0.28619
   2   0   0 1565.44  233.34   1 0.05974 0.05974 0.91953-0.91953-0.38842 0.38842
   2   0   144728.73 1907.49   1-0.27707 0.40100 0.21983-0.21983 0.93536-0.88930
   2   0   139303.92 1681.62   1 0.40926-0.28530-0.08223 0.08223-0.90870 0.95490
  -2   0  -138246.19 1637.46   1 0.21964-0.34337-0.58505 0.58505-0.78068 0.73470
   2   0   138237.24 1637.83   1 0.31945-0.19572-0.67022 0.67022-0.66988 0.71588
  -2   0  -141824.69 1787.66   1 0.08007-0.20400 0.91089-0.91089-0.40478 0.35867
   2   0   138540.11 1642.85   1 0.27406-0.15014 0.79113-0.79113-0.54680 0.59292
   2   0   219543.25 1719.46   1 0.63333-0.50506 0.20889-0.20889-0.74514 0.83742
  -2   0  -218712.09 1646.88   1 0.51811-0.64637 0.04606-0.04606-0.85406 0.76163
  -2   0  -218998.01 1678.12   1 0.35226-0.48044-0.69561 0.69561-0.62612 0.53411
   2   0   219040.28 1680.74   1 0.44278-0.31456-0.75631 0.75631-0.48158 0.57361
  -2   0  -218788.86 1645.18   1 0.31487-0.44318 0.75639-0.75639-0.57334 0.48109
   2   0   219393.05 1694.64   1 0.60743-0.47916 0.35851-0.35851-0.70887 0.80116
  -2   0  -314346.73 1275.71   1 0.63572-0.76837 0.21269-0.21269-0.74203 0.60362
   2   0   314212.37 1277.78   1 0.50538-0.37270-0.78740 0.78740-0.35296 0.49100
  -2   0  -316177.76 1416.18   1 0.59948-0.73213 0.37488-0.37488-0.70716 0.56871
   2   0   314857.96 1303.71   1 0.73507-0.60240-0.36323 0.36323-0.57247 0.71075
  -2   0  -4351573.5 2872.18   1 0.68992-0.82694 0.30732-0.30732-0.65540 0.47085
   2   0   4350115.2 2979.25   1 0.54195-0.40482-0.79895 0.79895-0.26067 0.44473
  -2   0  -4358375.6 2807.53   1 0.72906-0.86598-0.03254 0.03254-0.68366 0.49900
   2   0   4331766.8 2623.44   1 0.59330-0.45608-0.74757 0.74757-0.29853 0.48282
   2   0   5206731.4 1835.47   1 0.76974-0.62816 0.55587-0.55587-0.31384 0.54443
  -2   0  -5204618.8 1798.39   1 0.71595-0.85735 0.36107-0.36107-0.59752 0.36683
   2   0   5208927.8 1956.60   1 0.56636-0.42459-0.80197 0.80197-0.18991 0.42018
  -2   0  -5208356.0 1693.77   1 0.74265-0.88426-0.26480 0.26480-0.61509 0.38463
   2   0   5192430.0 1607.67   1 0.46128-0.31948-0.87839 0.87839-0.12508 0.35547
   2   0   668566.24 1810.50   1 0.76820-0.62223 0.59806-0.59806-0.22841 0.50511
  -2   0  -670551.39 1825.05   1 0.72910-0.87496 0.39187-0.39187-0.56110 0.28437
  -2   0  -664479.11 1618.98   1 0.73276-0.87885-0.38081 0.38081-0.56394 0.28739
   2   0   668592.30 1736.13   1 0.36874-0.22246-0.92935 0.92935-0.01817 0.29464
   2   0   7400003.5 3434.04   1 0.76194-0.61156 0.62794-0.62794-0.15849 0.48131
  -2   0  -7365872.4 3093.84   1 0.73603-0.88628 0.40965-0.40965-0.53891 0.21607
  -2   0  -7376869.0 3051.41   1 0.72297-0.87353-0.43855 0.43855-0.53383 0.21119
   2   0   7373460.7 3056.94   1 0.29982-0.14894-0.95232 0.95232 0.05635 0.26624
   2   0   8 9461.78  914.17   1 0.75353-0.59879 0.64986-0.64986-0.09932 0.46810
  -2   0  -810893.15 1100.64   1 0.47601-0.63097-0.77425 0.77425-0.41705 0.04894
  -2   0  -8 7994.45  736.75   1 0.71713-0.87217-0.46571 0.46571-0.51848 0.14975
   2   0   923321.51 2086.45   1 0.74345-0.58431 0.66711-0.66711-0.04721 0.46209
  -2   0  -927636.83 2469.10   1 0.47439-0.63381-0.77345 0.77345-0.42037 0.00623
  -2   0  -925759.37 2233.91   1 0.71512-0.87468-0.47459 0.47459-0.51318 0.09837
   2   0  10111590.7 2869.70   1 0.73245-0.56891 0.68081-0.68081-0.00035 0.46133
  -2   0 -10125796.6 3287.46   1 0.47111-0.63499-0.77180 0.77180-0.42704-0.03310
  -2   0 -10120641.0 2991.75   1-0.14520-0.01819 0.96720-0.96720-0.20838-0.25333
  -2   0 -10110110.7 2746.22   1 0.71558-0.87962-0.47266 0.47266-0.51432 0.05342
   2   0  1115024.75 1273.23   1 0.72074-0.55279 0.69188-0.69188 0.04263 0.46444
  -2   0 -1115771.55 1342.97   1 0.46653-0.63487-0.76944 0.76944-0.43622-0.06993
  -2   0 -1114582.98 1123.91   1-0.10260-0.06518 0.96337-0.96337-0.24776-0.26012
  -2   0 -1114249.75 1110.96   1 0.71771-0.88617-0.46316 0.46316-0.51996 0.01295
   2   0  12 3419.06  530.59   1 0.70844-0.53608 0.70090-0.70090 0.08270 0.47046
  -2   0 -12 2781.83  546.61   1 0.46089-0.63368-0.76645 0.76645-0.44735-0.10482
  -2   0 -12 2081.90  299.01   1-0.06149-0.11067 0.95664-0.95664-0.28467-0.26939
  -2   0 -12 2682.03  344.32   1 0.72122-0.89415-0.44710 0.44710-0.52908-0.02400
   2   0  1328265.21 1213.25   1 0.69594-0.51836 0.70803-0.70803 0.11976 0.47956
  -2   0 -1323687.32 2411.36   1 0.45434-0.63159-0.76288 0.76288-0.45998-0.13821
  -2   0 -1324270.19  877.68   1 0.72538-0.90279-0.42606 0.42606-0.54063-0.05855
   2   0  1427542.59 1813.44   1 0.68255-0.50050 0.71402-0.71402 0.15587 0.48955
  -2   0 -1430078.91 1996.45   1 0.44699-0.62870-0.75874 0.75874-0.47380-0.17039
  -2   0 -1424885.68 1526.98   1 0.72978-0.91167-0.40064 0.40064-0.55397-0.09130
   2   0  15 1604.03  462.20   1 0.66859-0.48208 0.71878-0.71878 0.19059 0.50094
  -2   0 -15 1083.16  464.14   1 0.43890-0.62498-0.75416 0.75416-0.48846-0.20154
  -2   0 -15 1589.38  261.49   1 0.73406-0.92042-0.37115 0.37115-0.56866-0.12270
   2   0  1646507.17 3219.47   1 0.65407-0.46309 0.72244-0.72244 0.22420 0.51343
  -2   0 -1651083.62 3556.97   1 0.43017-0.62071-0.74893 0.74893-0.50403-0.23197
   2   0  1717758.15 1564.74   1 0.63894-0.44350 0.72508-0.72508 0.25690 0.52683
  -2   0 -1720468.40 1816.32   1 0.42082-0.61581-0.74313 0.74313-0.52024-0.26176
   2   0  1824711.11 2062.31   1 0.62319-0.42328 0.72675-0.72675 0.28887 0.54096
  -2   0 -1826392.55 2300.17   1 0.41086-0.61031-0.73676 0.73676-0.53699-0.29101
   2   0  19 6463.75  778.86   1 0.60677-0.40240 0.72750-0.72750 0.32024 0.55569
  -2   0 -19 6835.41  867.65   1 0.40032-0.60422-0.72980 0.72980-0.55418-0.31982
  -2  -1  1914042.51 1723.05   1 0.44100-0.47566 0.69791-0.82269 0.56430 0.31132
  -2   1  1911161.06 1508.11   1 0.58059-0.61521 0.72688-0.60208 0.36680 0.50892
   2   1 -1913184.87 1628.36   1 0.41182-0.37716-0.73738 0.86202-0.53540-0.33860
   2  -1 -1912604.59 1688.03   1 0.52203-0.48741-0.79343 0.66883-0.31295-0.56132
   2   1 -1912795.04 1517.57   1 0.70613-0.67178-0.50900 0.63375-0.49222-0.38347
  -2  -1  18 1867.68  478.40   1 0.45134-0.49043 0.70122-0.82602 0.55187 0.27776
  -2   1  18 1590.69  562.83   1 0.59376-0.63294 0.72746-0.60264 0.34384 0.48600
   2   1 -18  853.09  442.11   1 0.42306-0.38395-0.74454 0.86918-0.51640-0.31160
   2  -1 -18 1316.57  531.48   1 0.53511-0.49603-0.79729 0.67269-0.27924-0.54902
   2   1 -18 1517.48  436.84   1 0.69736-0.65854-0.53812 0.66287-0.47338-0.35623
   2  -1 -18 1829.03  518.09   1 0.58253-0.54367-0.76192 0.63721-0.28306-0.54624
  -2  -1  1723357.53 1934.19   1 0.46050-0.50406 0.70401-0.82881 0.54065 0.24289
  -2   1  1721539.99 1865.25   1 0.60640-0.65004 0.72751-0.60269 0.32092 0.46281
   2   1 -1721263.73 1855.12   1 0.43375-0.39018-0.75109 0.87574-0.49770-0.28430
   2  -1 -1721923.65 1871.01   1 0.54808-0.50488-0.79975 0.67502-0.24495-0.53798
   2   1 -1720043.06 1687.86   1 0.68818-0.64489-0.56524 0.68999-0.45486-0.32866
   2  -1 -1722724.79 1859.73   1 0.55552-0.51218-0.79442 0.66972-0.24551-0.53771
  -2  -1  1614110.35 1260.42   1 0.46832-0.51634 0.70628-0.83108 0.53087 0.20658
  -2   1  1612701.04 1184.58   1 0.61839-0.66649 0.72707-0.60225 0.29824 0.43939
   2   1 -1615869.98 1317.21   1 0.44397-0.39598-0.75701 0.88160-0.47939-0.25684
   2  -1 -1612326.68 1153.40   1 0.56039-0.51271-0.80152 0.67680-0.20861-0.52826
   2   1 -1611551.21  976.63   1 0.67870-0.63094-0.59043 0.71518-0.43674-0.30069
   2  -1 -1613533.53 1087.47   1 0.52663-0.47882-0.82449 0.69978-0.20704-0.53011
  -2  -1  15 2379.97  634.90   1 0.47467-0.52717 0.70807-0.83287 0.52279 0.16856
  -2   1  15 1100.16  434.26   1 0.62974-0.68231 0.72618-0.60136 0.27583 0.41570
   2   1 -15 1377.84  485.66   1 0.45353-0.40108-0.76243 0.88703-0.46151-0.22870
   2  -1 -15 1409.06  411.53   1 0.57228-0.52012-0.80211 0.67738-0.17062-0.52020
   2   1 -15 1617.09  603.42   1 0.66904-0.61680-0.61378 0.73853-0.41910-0.27224
   2  -1 -15  346.89  391.60   1 0.49589-0.44369-0.85203 0.72739-0.16768-0.52348
  -2  -1  1448714.24 2352.79   1 0.47938-0.53634 0.70935-0.83414 0.51673 0.12854
  -2   1  1464029.45 3031.77   1 0.64046-0.69750 0.72486-0.60004 0.25372 0.39171
   2   1 -1468862.75 3232.75   1 0.46249-0.40558-0.76731 0.89190-0.44421-0.19999
   2  -1 -1448804.91 2407.68   1 0.58372-0.52708-0.80136 0.67664-0.13064-0.51412
   2   1 -1466862.48 3205.20   1 0.65931-0.60260-0.63532 0.76007-0.40206-0.24319
   2  -1 -1451154.92 2461.23   1 0.46278-0.40610-0.87734 0.75269-0.12689-0.51819
  -2  -1  13180779.3 5559.45   1 0.48219-0.54362 0.71009-0.83489 0.51307 0.08610
  -2   1  13171916.3 5326.79   1 0.65057-0.71207 0.72315-0.59833 0.23197 0.36736
   2   1 -13188684.817998.53   1 0.47082-0.40945-0.77165 0.89624-0.42764-0.17054
   2  -1 -13200714.419163.47   1 0.59469-0.53357-0.79908 0.67436-0.08829-0.51042
   2   1 -13182614.7 5670.90   1 0.64967-0.58849-0.65507 0.77982-0.38574-0.21342
   2  -1 -13189747.818090.06   1 0.42724-0.36608-0.90016 0.77551-0.08466-0.51434
  -2  -1  1216010.47 1440.96   1 0.48276-0.54866 0.71024-0.83504 0.51233 0.04075
  -2   1  1217241.74 1582.42   1 0.66005-0.72602 0.72107-0.59625 0.21064 0.34258
   2   1 -1217189.42 1510.45   1 0.47845-0.41262-0.77545 0.90005-0.41200-0.14016
   2  -1 -1213277.21 1234.27   1 0.60510-0.53950-0.79497 0.67025-0.04306-0.50959
   2   1 -1215493.51 1453.18   1 0.64026-0.57461-0.67300 0.79775-0.37030-0.18277
   2  -1 -1214983.39 1375.01   1 0.38896-0.32332-0.92034 0.79570-0.04076-0.51216
  -2  -1  11 8217.89  784.45   1 0.48060-0.55098 0.70967-0.83447 0.51514-0.00814
  -2   1  11 5055.28  576.42   1 0.66892-0.73935 0.71868-0.59386 0.18982 0.31730
   2   1 -11 5074.61  542.58   1 0.48529-0.41501-0.77872 0.90331-0.39759-0.10856
   2  -1 -11 6933.22  709.91   1 0.61458-0.54441-0.78882 0.66415 0.00567-0.51235
   2   1 -11 5915.77  792.12   1 0.63119-0.56104-0.68919 0.81390-0.35580-0.15099
   2  -1 -11 8431.36  768.88   1 0.34795-0.27794-0.93749 0.81283 0.00495-0.51189
  -2  -1  10212499.2 5266.21   1 0.47505-0.54989 0.70817-0.83297 0.52231-0.06140
  -2   1  10218330.3 5452.50   1 0.67714-0.75204 0.71602-0.59120 0.16963 0.29138
   2   1 -10225267.4 5611.68   1 0.49121-0.41648-0.78142 0.90601-0.38481-0.07533
   2  -1 -10204283.1 5135.74   1 0.62344-0.54879-0.77965 0.65497 0.05883-0.51945
   2   1 -10219203.0 5531.21   1 0.62284-0.54821-0.70326 0.82797-0.34275-0.11797
   2  -1 -10202549.3 5045.50   1 0.30298-0.22847-0.95151 0.82685 0.05304-0.51390
  -2  -1   997679.21 2515.79   1 0.46511-0.54443 0.70536-0.83016 0.53490-0.12008
  -2   1   986295.15 6449.70   1 0.68471-0.76407 0.71315-0.58833 0.15024 0.26467
   2   1  -985343.04 6372.04   1 0.49600-0.41681-0.78352 0.90811-0.37425-0.03987
   2  -1  -995491.98 2511.21   1 0.63107-0.55194-0.76677 0.64209 0.11748-0.53203
   2   1  -987562.90 2430.81   1 0.61539-0.53629-0.71519 0.83990-0.33132-0.08332
  -2  -1   8195563.5 1877.37   1 0.44939-0.53317 0.70061-0.82541 0.55423-0.18551
  -2   1   8192566.0 2011.70   1 0.69157-0.77539 0.71016-0.58534 0.13189 0.23692
   2   1  -8189864.7 1978.96   1 0.49930-0.41565-0.78492 0.90952-0.36685-0.00126
   2  -1  -8196257.3 2049.89   1 0.63690-0.55329-0.74889 0.62421 0.18306-0.55155
   2   1  -8185017.3 1992.67   1 0.60918-0.52561-0.72473 0.84944-0.32194-0.04663
   2   1  -780080.85 2118.65   1 0.50052-0.41241-0.78543 0.91002-0.36410 0.04199
  -2  -1   780957.56 2094.41   1 0.62466-0.71275-0.77799 0.65332 0.06718 0.25524
   2  -1  -786792.06 2271.46   1 0.63974-0.55170-0.72427 0.59960 0.25721-0.57973
  -2   1   776674.11 2020.17   1-0.13978 0.05092 0.96689-0.84225-0.21346 0.53666
   2   1  -777008.32 2105.56   1 0.60464-0.51660-0.73148 0.85619-0.31517-0.00733
  -2  -1   6 9940.36  910.29   1 0.39119-0.48392 0.68008-0.80486 0.62003-0.34352
   2   1  -6 8290.14  762.20   1 0.59305-0.50030 0.72745-0.60263 0.34510-0.62171
  -2   1   6 9894.72  981.24   1 0.70248-0.79556 0.70454-0.57976 0.10068 0.17590
   2   1  -6 9767.12  930.87   1 0.49853-0.40596-0.78459 0.90919-0.36860 0.09251
  -2  -1   6 9865.74  905.90   1 0.61982-0.71239-0.78392 0.65924 0.03577 0.24059
   2  -1  -610154.55  991.99   1 0.63828-0.54575-0.68932 0.56466 0.34267-0.61911
  -2   1   6 9201.32  907.68   1-0.07355-0.01968 0.95892-0.83428-0.27395 0.55098
   2  -1  -6 9211.10  997.44   1 0.19956-0.10666 0.84531-0.96989-0.49559 0.21891
  -2  -1   563739.75 1648.89   1 0.34104-0.43823 0.65911-0.78389 0.67026-0.43983
   2  -1  -562799.39 1652.08   1 0.76443-0.66687 0.61876-0.74351-0.18101-0.04957
   2   1  -573542.35 1899.77   1 0.49099-0.39397-0.78132 0.90591-0.38529 0.15521
  -2  -1   563370.87 1637.67   1 0.61362-0.71066-0.78959 0.66492 0.00047 0.22983
   2  -1  -566386.21 1763.41   1 0.62929-0.53227-0.63944 0.51477 0.44170-0.67207
   2  -1  -557187.59 2514.08   1 0.23052-0.13296 0.82430-0.94882-0.51708 0.28645
  -2  -1   560348.15 2659.19   1 0.45456-0.55156-0.88299 0.75835-0.11699 0.34738
  -2  -1   4306729.5 2538.97   1 0.26896-0.37062 0.62435-0.74913 0.73337-0.54903
  -2   1   4315012.6 2703.34   1 0.70916-0.81105 0.70043-0.57565 0.08046 0.10392
   2  -1  -4309980.7 2655.56   1 0.76262-0.66065 0.62565-0.75041-0.16419-0.02027
   2   1  -4306672.9 2548.69   1 0.47230-0.37082-0.77240 0.89700-0.42463 0.24057
  -2  -1   4308695.0 2565.95   1 0.60519-0.70664-0.79493 0.67021-0.04265 0.22687
   2  -1  -4315677.2 2657.14   1 0.60761-0.50633-0.56787 0.44324 0.55526-0.73970
  -2   1   4316736.7 2656.21   1 0.08243-0.18419 0.90984-0.78526-0.40666 0.59111
  -2  -1   4303280.2 2706.62   1 0.48447-0.58595-0.86124 0.73660-0.15343 0.33775
  -2  -1   377606.75 1964.48   1 0.16739-0.27352 0.56722-0.69196 0.80637-0.66811
   2  -1  -378474.96 1998.41   1 0.76094-0.65457 0.63114-0.75589-0.15040 0.01205
   2   1  -376865.89 1916.59   1 0.42485-0.31893-0.74565 0.87029-0.51331 0.37531
  -2  -1   376908.02 1924.81   1 0.59098-0.69691-0.80006 0.67533-0.10314 0.24130
   2  -1  -379884.03 2028.55   1 0.56458-0.45874-0.46296 0.33833 0.68330-0.82163
  -2   1   379794.02 2015.42   1 0.48592-0.59175-0.31024 0.43489 0.81708-0.67874
  -2   1   377220.35 1954.75   1 0.17365-0.27985 0.86174-0.73716-0.47670 0.61503
   2   1  -372864.43 1995.24   1 0.61763-0.51171-0.71167 0.83638-0.33473 0.19651
  -2  -1   371672.24 1867.01   1 0.51539-0.62132-0.83505 0.71034-0.19249 0.33071
  -2  -1   1149023.0 1273.32   1-0.13758 0.02258 0.34584-0.47053 0.92814-0.88209
  -2  -1   1141374.8 1103.23   1 0.30505-0.41988-0.65860 0.53396-0.68787 0.73387
   2  -1  -1147365.9 1289.36   1 0.37107-0.25611-0.12218-0.00249 0.92052-0.96664
   2  -1  -1150215.7 1318.39   1 0.48293-0.36783 0.56863-0.69325-0.66590 0.61975
   2   1  -1125112.5 3164.58   1 0.66028-0.54543-0.63326 0.75801-0.40373 0.35764
  -2  -1   1143539.8 1359.25   1 0.58144-0.69631-0.76332 0.63862-0.28151 0.32758
  -2   1   039632.93 1689.70   1 0.63296-0.75250 0.72583-0.60101 0.26928-0.26928
   2  -1   040057.99 1712.57   1 0.76551-0.64594 0.61401-0.73877-0.19227 0.19227
   2  -1   040754.75 1752.96   1-0.11281 0.23211-0.22739 0.10274-0.96724 0.96724
  -2  -1   040467.77 1728.26   1 0.63924-0.75872-0.73223 0.60757 0.23493-0.23493
   2   1   044068.92 1874.70   1 0.52643-0.40687-0.38528 0.50992 0.75791-0.75791
   2  -1   038652.79 1674.73   1 0.22013-0.10069 0.09134-0.21602 0.97118-0.97118
   2  -1   042930.09 1852.77   1 0.57163-0.45213 0.42839-0.55304-0.69979 0.69979
   2   1   045322.55 1974.87   1 0.69503-0.57571-0.54532 0.67007-0.46856 0.46856
  -2  -1   039095.19 1711.56   1 0.61810-0.73743-0.71093 0.58622-0.33545 0.33545
  -2  -1  -1362174.2 2885.45   1 0.62463-0.74855-0.77803 0.65336 0.06695-0.11302
   2   1   2346659.2 2865.48   1 0.59044-0.46218 0.14394-0.01908-0.79413 0.88657
  -2   1  -3194446.3 1558.98   1 0.74253-0.87523 0.42763-0.30284-0.51553 0.37717
   2   1   3199686.7 1796.91   1 0.66867-0.53602 0.26809-0.14329-0.69354 0.83195
   2  -1   3200007.2 1721.53   1 0.30073-0.16810-0.65572 0.53115-0.69251 0.83043
  -2   1  -3193313.9 1662.91   1 0.68752-0.82007 0.15169-0.02700-0.71013 0.57161
  -2  -1  -3200140.2 1614.16   1 0.73633-0.86899-0.35254 0.22783-0.57752 0.43924
  -2  -1  -4455917.3 3795.81   1 0.59481-0.73210-0.79905 0.67432-0.08780-0.09641
   2   1   4479574.9 3946.58   1 0.63847-0.50111-0.74031 0.86498 0.21045-0.02620
   2   1   4497403.2 3858.37   1 0.28586-0.14876 0.78146-0.65694-0.55461 0.73911
   2  -1   4455995.7 3684.16   1 0.73858-0.60144-0.33051 0.20580-0.58758 0.77195
   2  -1   524438.54 1083.75   1 0.68060-0.53873 0.71477-0.83959 0.16088 0.06962
  -2   1  -525108.99 1107.13   1 0.76571-0.90719 0.51719-0.39240-0.38234 0.15173
   2   1   522928.79 1104.00   1 0.74592-0.60445 0.43769-0.31290-0.50200 0.73261
  -2   1  -525895.81 1233.26   1 0.28285-0.42436-0.64081 0.76538-0.71369 0.48383
  -2  -1  -524956.25 1162.67   1 0.58662-0.72839-0.80093 0.67621-0.11991-0.11036
   2   1   522123.74 1020.16   1 0.63803-0.49619-0.74306 0.86774 0.20187 0.02842
   2   1   524684.39 1063.03   1-0.05698 0.19846 0.95573-0.83109-0.28865 0.51951
  -2  -1  -522293.82  960.04   1 0.67107-0.81240 0.20329-0.32798-0.71297 0.48210
  -2   1  -525399.33 1137.27   1 0.73362-0.87494-0.06471 0.18941-0.67646 0.44563
   2  -1   524964.27 1137.63   1 0.71283-0.57115-0.48390 0.35915-0.50765 0.73810
   2  -1   686493.31 2193.63   1 0.67691-0.53058 0.71611-0.84093 0.17023 0.10638
  -2   1  -692969.86 2341.62   1 0.76653-0.91238 0.52255-0.39776-0.37332 0.09659
   2   1   694805.50 2462.74   1 0.76144-0.61558 0.49433-0.36954-0.41932 0.69605
  -2   1  -695729.04 2474.10   1 0.31643-0.46243-0.66780 0.79244-0.67372 0.39772
  -2  -1  -689366.05 2364.20   1 0.57852-0.72478-0.80188 0.67716-0.14928-0.12705
  -2  -1  -683704.75 2062.10   1 0.56988-0.71569 0.43156-0.55622-0.69926 0.42237
  -2   1  -696496.41 2440.60   1 0.74103-0.88675-0.13842 0.26312-0.65704 0.38004
   2  -1   690074.30 2291.27   1 0.67176-0.52561-0.60740 0.48265-0.42400 0.70054
   2  -1   778923.85 2031.13   1 0.67093-0.52013 0.71807-0.84289 0.18496 0.13774
  -2   1  -774061.03 1909.19   1 0.76632-0.91657 0.52115-0.39636-0.37568 0.05284
   2   1   766459.72 1807.42   1 0.76849-0.61811 0.53852-0.41376-0.34555 0.66837
  -2   1  -774059.28 1986.42   1 0.33912-0.48958-0.68563 0.81027-0.64412 0.32212
  -2  -1  -778065.54 1933.15   1 0.48027-0.63052 0.57230-0.69691-0.66468 0.34168
  -2   1  -774153.55 1916.80   1 0.74372-0.89383-0.19238 0.31708-0.64020 0.31705
   2  -1   781112.91 2090.16   1 0.62258-0.47195-0.70369 0.57898-0.34234 0.66485
  -2  -1  -773136.18 1828.86   1 0.40149-0.55225-0.91420 0.78956-0.05496-0.26757
   2  -1   8171472.5 4223.31   1 0.66350-0.50825 0.72020-0.84502 0.20264 0.16617
   2   1   8176456.6 4420.05   1 0.76995-0.61518 0.57385-0.44909-0.27903 0.64797
  -2   1  -8156190.9 1485.52   1 0.76553-0.92016 0.51602-0.39123-0.38429 0.01532
  -2   1  -8180434.1 4521.58   1 0.35444-0.50935-0.69724 0.82189-0.62306 0.25506
  -2  -1  -8182258.2 4577.53   1 0.56207-0.71728-0.80167 0.67695-0.20343-0.16500
  -2  -1  -8167833.8 4055.25   1 0.41682-0.57146 0.65248-0.77709-0.63286 0.26373
  -2   1  -8176549.0 4340.41   1 0.74418-0.89869-0.23014 0.35484-0.62707 0.25775
   2  -1   8169842.3 1629.23   1 0.56964-0.41453-0.77802 0.65331-0.26492 0.63350
  -2  -1  -8162244.3 3943.54   1 0.47985-0.63509-0.86482 0.74017-0.14773-0.22089
   2  -1   9114859.9 2898.42   1 0.65500-0.49528 0.72224-0.84706 0.22210 0.19281
   2   1   9118426.2 3062.52   1 0.76759-0.60841 0.60247-0.47771-0.21866 0.63372
  -2   1  -9122731.5 3167.25   1 0.36442-0.52378-0.70462 0.82926-0.60885 0.19484
  -2  -1  -9117540.4 3088.32   1 0.55355-0.71325-0.80066 0.67594-0.22912-0.18536
  -2  -1  -9101950.5 2489.60   1 0.37607-0.53510 0.69741-0.82202-0.61007 0.19479
  -2   1  -9117944.1 2952.63   1 0.74294-0.90245-0.25458 0.37928-0.61904 0.20422
  -2  -1  -9105702.7 2608.27   1 0.53366-0.69323-0.81757 0.69286-0.21626-0.19838
   2  -1   9109840.7 2759.59   1 0.51556-0.35583-0.83491 0.71026-0.19266 0.60737
   2  -1  1063323.13 1708.98   1 0.64561-0.48142 0.72405-0.84887 0.24275 0.21826
   2   1  1058687.92 1733.83   1 0.76252-0.59893 0.62600-0.50124-0.16334 0.62451
  -2   1 -1058662.47 1682.41   1 0.37043-0.53425-0.70899 0.83363-0.60008 0.14007
  -2  -1 -1066080.74 1888.29   1 0.54451-0.70839-0.79950 0.67491-0.25356-0.20658
  -2  -1 -1055154.33 1381.56   1 0.35123-0.51469 0.72222-0.84674-0.59583 0.13458
  -2   1 -1057572.70 1566.60   1 0.74251-0.90649-0.26898 0.39369-0.61345 0.15254
  -2  -1 -1059403.52 1535.97   1 0.57491-0.73895-0.77157 0.64686-0.27229-0.18842
   2  -1  1110587.84  946.15   1 0.63542-0.46677 0.72554-0.85036 0.26423 0.24289
   2   1  1111061.59 1131.94   1 0.75569-0.58774 0.64521-0.52043-0.11235 0.61943
  -2   1 -11 9741.37  993.38   1 0.37341-0.54168-0.71114 0.83578-0.59568 0.08967
  -2  -1 -11 9707.27  959.29   1 0.53550-0.70383-0.79739 0.67279-0.27821-0.22794
  -2  -1 -11 9363.84  866.92   1 0.34023-0.50808 0.73289-0.85741-0.58915 0.08177
  -2   1 -1110149.81  921.27   1 0.74227-0.91073-0.27494 0.39965-0.61108 0.10408
  -2  -1 -11 8392.41  743.02   1 0.60796-0.77647-0.72656 0.60186-0.32012-0.18667
   2  -1  1234205.69 3069.44   1 0.62449-0.45137 0.72665-0.85148 0.28631 0.26691
   2   1  1235387.64 3244.47   1 0.74705-0.57469 0.66162-0.53685-0.06449 0.61766
  -2   1 -1238531.30 4201.07   1 0.37401-0.54673-0.71156 0.83620-0.59479 0.04279
  -2  -1 -1231213.12 2747.99   1 0.33860-0.51085 0.73445-0.85897-0.58815 0.03464
  -2   1 -1235371.40 3156.77   1 0.74231-0.91525-0.27391 0.39861-0.61150 0.05840
  -2  -1 -1233518.04 2961.00   1 0.63550-0.80848-0.68162 0.55692-0.36264-0.19022
   2  -1  1345311.46 1540.69   1 0.61283-0.43525 0.72734-0.85216 0.30887 0.29046
   2   1  1351954.80 1856.27   1 0.73714-0.56038 0.67546-0.55068-0.01936 0.61864
  -2   1 -1355022.03 1949.75   1 0.37268-0.54986-0.71061 0.83525-0.59677-0.00123
  -2   1 -1354514.26 1779.00   1 0.74258-0.91999-0.26693 0.39164-0.61425 0.01507
  -2  -1 -1341277.70 1331.22   1 0.65908-0.83653-0.63582 0.51107-0.40166-0.19750
   2  -1  1424024.99 1523.92   1 0.60047-0.41843 0.72755-0.85237 0.33179 0.31363
   2   1  1428276.27 1853.64   1 0.72615-0.54499 0.68713-0.56235 0.02348 0.62188
  -2   1 -1427230.35 1777.11   1 0.36975-0.55138-0.70850 0.83314-0.60108-0.04292
  -2   1 -1431183.31 1912.99   1 0.74294-0.92482-0.25476 0.37947-0.61897-0.02630
  -2  -1 -1422245.56 1356.59   1 0.67943-0.86136-0.58858 0.46383-0.43810-0.20715
   2  -1  1532954.00 2417.71   1 0.58754-0.40098 0.72723-0.85203 0.35484 0.33652
   2   1  1534072.23 2603.72   1 0.71421-0.52864 0.69695-0.57217 0.06445 0.62701
  -2   1 -1533916.57 2549.55   1 0.36546-0.55155-0.70539 0.83003-0.60733-0.08267
  -2   1 -1533022.61 2378.37   1 0.74413-0.92941-0.23795 0.36266-0.62421-0.06826
   2  -1  1639162.12 2751.96   1 0.57375-0.38271 0.72640-0.85120 0.37833 0.35912
   2   1  1635291.79 2546.35   1 0.70140-0.51143 0.70516-0.58038 0.10385 0.63371
  -2   1 -1638322.58 2725.66   1 0.36000-0.55054-0.70137 0.82602-0.61519-0.12081
  -2  -1 -1640142.81 2853.56   1 0.48546-0.67608-0.77879 0.65420-0.39723-0.33900
   2  -1  17 2712.26  670.11   1 0.55921-0.36371 0.72500-0.84980 0.40204 0.38150
   2   1  17 2575.11  753.29   1 0.68811-0.49267 0.71172-0.58689 0.14123 0.64250
  -2   1 -17 3547.06  819.18   1 0.35348-0.54847-0.69653 0.82117-0.62440-0.15760
  -2  -1 -17 3483.21  833.26   1 0.47434-0.66942-0.77343 0.64883-0.42047-0.36177
   2  -1  18 4565.37 1033.13   1 0.54391-0.34394 0.72299-0.84778 0.42595 0.40368
   2   1  18 3085.53  779.31   1 0.67369-0.47378 0.71719-0.59237 0.17822 0.65162
  -2   1 -18 2842.54  740.07   1 0.34602-0.54546-0.69090 0.81554-0.63475-0.19325
  -2  -1 -18 5837.28 1308.19   1 0.46281-0.66235-0.76748 0.64289-0.44358-0.38468
   2  -1  1919229.01 2226.80   1 0.52781-0.32336 0.72032-0.84512 0.45005 0.42567
   2   1  1918454.76 2215.57   1 0.65847-0.45410 0.72145-0.59663 0.21427 0.66167
  -2   1 -1918104.93 2142.55   1 0.33767-0.54157-0.68451 0.80915-0.64607-0.22793
  -2  -2  1913644.51 1719.43   1 0.33640-0.37106 0.65703-0.90659 0.67463 0.20098
  -2   2  19 9910.64 1419.66   1 0.62174-0.65645 0.72686-0.47722 0.29172 0.58422
   2   2 -1911723.89 1504.15   1 0.33170-0.29704-0.67988 0.92917-0.65400-0.22000
   2  -2 -1911208.46 1594.83   1 0.55539-0.52115-0.80093 0.55148-0.22370-0.65134
   2   2 -1912388.76 1537.36   1 0.73089-0.69666-0.39356 0.64298-0.55758-0.31815
  -2  -2  18 3800.35  931.51   1 0.34339-0.38251 0.66016-0.90972 0.66803 0.16151
  -2   2  18 2327.25  739.76   1 0.63500-0.67418 0.72559-0.47595 0.26509 0.56475
   2   2 -18 2298.24  625.36   1 0.33995-0.30084-0.68627 0.93555-0.64300-0.18500
   2  -2 -18 6126.82 1427.00   1 0.56787-0.52915-0.80203 0.55259-0.18507-0.64392
   2   2 -18 4480.07 1005.46   1 0.72686-0.68816-0.41795 0.66737-0.54495-0.28468
  -2  -2  1716673.57 1305.27   1 0.34855-0.39214 0.66243-0.91199 0.66309 0.12036
  -2   2  1717457.13 1427.72   1 0.64763-0.69127 0.72369-0.47405 0.23839 0.54535
   2   2 -1718191.42 1428.73   1 0.34720-0.30363-0.69180 0.94108-0.63313-0.14887
   2  -2 -1715914.75 1403.08   1 0.57975-0.53655-0.80179 0.55234-0.14495-0.63798
   2   2 -1720528.99 1663.52   1 0.72265-0.67947-0.44015 0.68957-0.53295-0.25060
   2  -2 -1714970.67 1185.87   1 0.46362-0.42038-0.87675 0.62746-0.12790-0.65541
  -2  -2  1618379.68 1381.57   1 0.35168-0.39974 0.66380-0.91336 0.66006 0.07730
  -2   2  1617745.44 1537.12   1 0.65964-0.70775 0.72117-0.47153 0.21158 0.52605
   2   2 -1617663.45 1412.34   1 0.35334-0.30532-0.69642 0.94571-0.62461-0.11139
   2  -2 -1619670.25 1582.70   1 0.59098-0.54330-0.80005 0.55061-0.10313-0.63374
   2   2 -1619398.36 1535.80   1 0.71838-0.67073-0.46019 0.70960-0.52167-0.21578
   2  -2 -1618283.87 1374.71   1 0.42300-0.37528-0.90261 0.65332-0.07973-0.65751
  -2  -2  1511916.19 1432.29   1 0.35253-0.40506 0.66416-0.91372 0.65924 0.03204
  -2   2  1512847.33 1549.38   1 0.67106-0.72364 0.71803-0.46839 0.18463 0.50690
   2   2 -1515489.40 1291.69   1 0.35823-0.30576-0.70007 0.94935-0.61770-0.07230
   2  -2 -1514096.79 1713.34   1 0.60151-0.54935-0.79665 0.54720-0.05934-0.63148
   2   2 -1514911.23 1245.05   1 0.71430-0.66206-0.47796 0.72746-0.51119-0.18015
   2  -2 -1512576.04 1495.98   1 0.37968-0.32748-0.92461 0.67532-0.03034-0.66082
  -2  -2  14 5143.02  725.61   1 0.35075-0.40775 0.66339-0.91295 0.66096-0.01576
  -2   2  14 5768.39  891.58   1 0.68191-0.73895 0.71426-0.46462 0.15751 0.48792
   2   2 -14 4768.53  764.63   1 0.36170-0.30477-0.70262 0.95191-0.61276-0.03124
   2  -2 -14 4796.48  892.48   1 0.61123-0.55459-0.79133 0.54189-0.01328-0.63148
   2   2 -14 7723.79 1174.31   1 0.71033-0.65362-0.49359 0.74309-0.50178-0.14347
   2  -2 -14 4219.04  684.23   1 0.33390-0.27737-0.94239 0.69307 0.02016-0.66536
  -2  -2  1323993.50 1229.12   1 0.34591-0.40737 0.66127-0.91083 0.66562-0.06651
  -2   2  1329214.20 1642.35   1 0.69220-0.75370 0.70986-0.46022 0.13016 0.46917
   2   2 -1333224.27 1686.28   1 0.36345-0.30207-0.70392 0.95320-0.61023 0.01223
   2  -2 -1328615.64 1639.80   1 0.61976-0.55855-0.78399 0.53464 0.03537-0.63417
   2   2 -1336472.78 1916.21   1 0.70673-0.64555-0.50687 0.75638-0.49356-0.10560
   2  -2 -1325350.20 1363.99   1 0.28458-0.22355-0.95592 0.70660 0.07224-0.67136
  -2  -2  1224121.58  991.60   1 0.33742-0.40335 0.65749-0.90705 0.67367-0.12065
  -2   2  1226941.52 1148.93   1 0.70156-0.76823 0.70506-0.45551 0.10336 0.44981
   2   2 -1227400.04 1078.55   1 0.36314-0.29731-0.70369 0.95297-0.61068 0.05868
   2  -2 -1222657.28 2306.72   1 0.62740-0.56171-0.77380 0.52445 0.08712-0.63986
   2   2 -1227773.18 1254.94   1 0.70363-0.63798-0.51768 0.76718-0.48672-0.06635
  -2  -2  11133825.4 4609.79   1 0.32452-0.39492 0.65161-0.90117 0.68562-0.17868
  -2   2  11119504.1 4218.84   1 0.71079-0.78186 0.69934-0.44979 0.07536 0.43171
   2   2 -11108897.0 3835.76   1 0.36023-0.28994-0.70154 0.95083-0.61486 0.10885
   2  -2 -11134870.4 4734.36   1 0.63363-0.56346-0.76041 0.51106 0.14241-0.64909
   2   2 -11123409.8 4402.91   1 0.70121-0.63109-0.52578 0.77528-0.48149-0.02548
  -2  -2  1017722.81 1390.40   1 0.30623-0.38109 0.64297-0.89253 0.70199-0.24114
  -2   2  1021575.86 1760.22   1 0.71950-0.79497 0.69290-0.44334 0.04690 0.41407
   2   2 -1019214.76 1531.48   1 0.35395-0.27920-0.69688 0.94616-0.62375 0.16375
   2  -2 -1018576.23 1513.87   1 0.63803-0.56338-0.74308 0.49374 0.20181-0.66243
  -2   2  1020474.51 1622.40   1-0.11589 0.04018 0.96491-0.71562-0.23560 0.69732
   2   2 -1017607.12 1590.40   1 0.69965-0.62505-0.53088 0.78038-0.47816 0.01727
  -2  -2   936711.48 1804.82   1 0.28128-0.36060 0.63065-0.88021 0.72329-0.30852
   2   2  -929919.09 1540.39   1 0.34314-0.26395-0.68871 0.93800-0.63868 0.22467
   2  -2  -934764.71 1786.58   1 0.63984-0.56079-0.72110 0.47177 0.26573-0.68039
  -2   2   926620.89 2339.46   1-0.05248-0.02760 0.95478-0.70549-0.29262 0.70817
   2   2  -930703.90 1703.24   1 0.69912-0.62005-0.53258 0.78208-0.47705 0.06224
  -2  -2   857515.54 2788.73   1 0.24818-0.33199 0.61340-0.86288 0.74975-0.38105
  -2   2   848544.71 2411.69   1 0.73536-0.81963 0.67756-0.42801-0.01199 0.38078
   2   2  -850573.16 2460.05   1 0.32607-0.24242-0.67546 0.92475-0.66137 0.29337
   2  -2  -851742.11 2568.96   1 0.63863-0.55508-0.69266 0.44334 0.33520-0.70379
  -2   2   846460.89 2272.48   1 0.01431-0.09835 0.93628-0.68712-0.35094 0.71984
   2   2  -851777.41 2598.92   1 0.69982-0.61628-0.53032 0.77982-0.47853 0.10981
  -2  -2   718734.55 1852.83   1 0.20474-0.29301 0.58927-0.83875 0.78156-0.45894
  -2   2   710497.47 1009.69   1 0.74251-0.83119 0.66845-0.41889-0.04287 0.36555
   2   2  -712931.50 1257.26   1 0.29933-0.21116-0.65457 0.90372-0.69421 0.37240
   2  -2  -720401.64 1871.63   1 0.63302-0.54499-0.65631 0.40698 0.41051-0.73303
  -2   2   712508.44 1574.42   1 0.08481-0.17327 0.90878-0.65962-0.40855 0.73134
   2   2  -711315.69 1196.85   1 0.70194-0.61393-0.52338 0.77288-0.48305 0.16042
  -2  -2   630986.73 1396.01   1 0.14890-0.24164 0.55588-0.80536 0.81781-0.54128
  -2   2   637258.41 1710.48   1 0.74914-0.84222 0.65813-0.40857-0.07514 0.35173
   2   2  -642522.83 1878.64   1 0.25966-0.16704-0.62089 0.87004-0.73964 0.46380
  -2  -2   631696.83 1423.40   1 0.53708-0.62964-0.79779 0.54860-0.27397 0.55006
   2  -2  -637179.01 1716.28   1 0.62142-0.52925-0.61047 0.36121 0.49107-0.76773
  -2   2   641294.35 1913.63   1 0.15811-0.25101 0.87099-0.62183-0.46515 0.74182
  -2   2   5189938.7 1869.37   1 0.75520-0.85269 0.64629-0.39673-0.10936 0.33985
   2   2  -5190354.4 1669.96   1 0.19918-0.10211-0.56607 0.81522-0.79993 0.57007
  -2  -2   5204563.5 1811.59   1 0.49830-0.59533-0.78450 0.53531-0.36910 0.59917
  -2   2   5185310.9 1727.09   1 0.23320-0.33077 0.82237-0.57335-0.51894 0.74957
   2   2  -5191565.4 2012.67   1 0.71098-0.61402-0.49112 0.74063-0.50328 0.27283
  -2   2   4154773.4 1552.62   1 0.76042-0.86238 0.63272-0.38321-0.14634 0.33081
   2   2  -4155117.5 1350.93   1 0.10665-0.00514-0.47520 0.72404-0.87338 0.68973
  -2   2   3176316.9 1650.44   1 0.76508-0.87145 0.61598-0.36647-0.18763 0.32599
  -2  -2   3161965.3 1378.28   1 0.33947-0.44539-0.68590 0.43662-0.64364 0.78165
   2  -2  -3159149.8 1506.71   1 0.52561-0.41978-0.38370 0.13440 0.75927-0.89761
   2   2  -273446.51 1848.14   1 0.03090 0.07966 0.47746-0.22803 0.87810-0.97038
  -2   2   269089.09 1772.99   1 0.76860-0.87937 0.59472-0.34521-0.23568 0.32791
   2  -2  -262930.31 1607.90   1 0.71995-0.60917 0.37012-0.61972-0.58708 0.49481
  -2  -2   264044.85 1592.30   1 0.17922-0.28962-0.54714 0.29798-0.81762 0.90957
   2  -2  -269779.35 1798.48   1 0.46436-0.35397-0.27230 0.02295 0.84274-0.93497
  -2   2   253620.61 2314.90   1 0.31762-0.42806-0.04336 0.29271 0.94722-0.85503
  -2  -2   270265.57 1746.57   1 0.21535-0.32579 0.09768-0.34704 0.97163-0.87944
  -2   2   272296.97 1869.02   1 0.45281-0.56352 0.60867-0.35945-0.65151 0.74379
   2   2  -267124.48 1793.27   1 0.73433-0.62403-0.36913 0.61854-0.56964 0.47746
   2   2  -1116192.8 2884.52   1-0.10416 0.21921 0.37403-0.12460 0.92154-0.96768
  -2   2   1108939.5 2715.94   1 0.77000-0.88517 0.56559-0.31607-0.29528 0.34140
   2  -2  -1119614.3 2962.81   1 0.67652-0.56137 0.28220-0.53181-0.68020 0.63406
  -2  -2   1118596.1 2914.01   1-0.04278-0.07206-0.31088 0.06158-0.94948 0.99549
  -2  -2   1128267.5 3151.14   1 0.40646-0.52141-0.17706-0.07228 0.89634-0.85023
  -2   2   198703.15 2469.53   1 0.22785-0.34279 0.08108 0.16827 0.97031-0.92421
  -2   2   1117454.2 2965.89   1 0.51643-0.63153 0.51994-0.27071-0.68040 0.72654
   2   2  -1113054.0 2882.72   1 0.74114-0.62637-0.29692 0.54634-0.60210 0.55601
  -2  -2   1112791.9 2858.85   1 0.69064-0.80549-0.55826 0.30876-0.45972 0.50581
  -2   2   050967.12 2190.75   1 0.76621-0.88575 0.52039-0.27081-0.37696 0.37696
   2  -2   041355.50 1780.51   1 0.57477-0.45522 0.12167-0.37139-0.80921 0.80921
   2   2   052839.47 2300.61   1 0.43407-0.31451-0.05432 0.30405-0.89923 0.89923
  -2  -2   041352.97 1781.27   1 0.54017-0.65973-0.41238 0.16308 0.73359-0.73359
   2   2   051429.25 2199.01   1 0.26988-0.15044 0.02400 0.22535 0.96259-0.96259
   2  -2   036570.25 1608.12   1 0.68107-0.56169 0.17276-0.42214-0.71154 0.71154
  -2  -2   037296.62 1648.47   1 0.71047-0.82979-0.49304 0.24354-0.50211 0.50211
  -2   2  -1138468.011793.90   1 0.74577-0.86970 0.43723-0.18765-0.50263 0.45651
  -2  -2  -1127325.0 3164.00   1 0.33942-0.46339-0.15680-0.09292-0.92747 0.88126
   2  -2   1132045.8 3280.70   1-0.01697 0.14056-0.34118 0.09235-0.93984 0.98575
  -2  -2  -1149786.0 1308.84   1 0.60665-0.73072-0.56516 0.31590 0.55907-0.60518
   2   2   1143830.6 1236.72   1 0.43113-0.30702-0.21674 0.46609 0.87586-0.82975
   2   2   1141707.2 1350.74   1 0.73560-0.61187-0.08076 0.33017-0.67257 0.71874
  -2  -2  -1130263.5 3253.19   1 0.72658-0.85030-0.41949 0.17008-0.54414 0.49805
  -2   2  -213345.81 1175.40   1 0.14217-0.27063 0.55168-0.30220 0.82184-0.91401
  -2   2  -215255.02 1340.06   1 0.65926-0.78754 0.25170-0.00209-0.70852 0.61625
  -2  -2  -2 9598.19  883.59   1 0.42795-0.55632-0.06128-0.18844-0.90172 0.80931
  -2   2  -214244.45 1344.42   1-0.10556-0.02264-0.23624 0.48554-0.96594 0.87391
   2  -2   210252.25  984.34   1 0.08799 0.04001-0.45586 0.20702-0.88569 0.97751
  -2  -2  -2 9969.59  904.64   1 0.63255-0.76102-0.65403 0.40470 0.41486-0.50701
   2   2   213700.39 1221.16   1 0.52246-0.39375-0.37763 0.62692 0.76447-0.67224
  -2   2  -214774.35 1344.28   1 0.65534-0.78350 0.24720 0.00217-0.71373 0.62138
   2   2   213534.94 1217.06   1 0.70923-0.58107 0.07000 0.17937-0.70149 0.79383
   2  -2   210675.27  991.66   1 0.73170-0.60358-0.05045-0.19894-0.67975 0.77208
  -2  -2  -2 9497.79  871.23   1 0.73786-0.86605-0.33799 0.08858-0.58421 0.49203
  -2   2  -3144302.5 1158.98   1 0.54646-0.67940 0.72336-0.47376 0.42204-0.56031
   2   2   3158819.3 1574.38   1 0.65578-0.52313 0.24575 0.00385-0.71383 0.85224
  -2   2  -3155270.3 1252.74   1 0.39392-0.52670-0.09910 0.34883-0.91378 0.77517
  -2   2  -3132408.5 3302.25   1-0.02182-0.11082-0.33501 0.58431-0.94195 0.80392
   2   2   3146631.0 1329.20   1 0.57104-0.43785-0.47721 0.72647 0.66796-0.52963
   2   2   3141861.3 1278.46   1 0.65567-0.52312 0.24633 0.00303-0.71373 0.85225
  -2   2  -3147426.2 1449.35   1 0.68305-0.81560 0.16642 0.08295-0.71115 0.57263
  -2  -2  -3152677.0 1378.70   1 0.74306-0.87572-0.24923-0.00018-0.62107 0.48280
   2  -2   4 4954.05  469.42   1-0.05934 0.19678 0.40991-0.65934 0.91019-0.72562
  -2   2  -4 8990.45  796.26   1 0.69021-0.82761 0.71078-0.46114 0.13558-0.31999
  -2   2  -410611.30 1017.53   1 0.04877-0.18561-0.41416 0.66300-0.90889 0.72524
  -2  -2  -4 5004.35  520.17   1 0.63858-0.77594-0.73956 0.49021 0.21274-0.39699
   2   2   4 8440.82  778.04   1 0.59683-0.45908-0.53881 0.78807 0.59453-0.41009
   2   2   410150.88  923.16   1 0.56744-0.43040 0.43596-0.18666-0.69852 0.88312
  -2   2  -4 9564.71  907.07   1 0.70316-0.84010 0.09492 0.15445-0.70465 0.51996
  -2  -2  -4 5327.77  506.19   1 0.74212-0.87904-0.15530-0.09409-0.65201 0.46735
   2  -2   5195515.9 1600.78   1 0.16944-0.02759 0.56846-0.81794 0.80506-0.57463
  -2   2  -5194934.7 1622.64   1 0.73523-0.87675 0.67772-0.42816-0.01146-0.21902
   2   2   5177677.2 1829.56   1 0.72644-0.58497 0.38537-0.13579-0.56899 0.79960
  -2  -2  -5195271.5 1881.97   1 0.63340-0.77524-0.76103 0.51169 0.14004-0.37035
   2   2   5193375.9 1655.09   1 0.44508-0.30362 0.61844-0.36921-0.64763 0.87834
  -2   2  -5191651.1 1843.81   1 0.71720-0.85853 0.03367 0.21570-0.69604 0.46518
  -2  -2  -5179022.9 1564.20   1 0.73297-0.87428-0.05971-0.18969-0.67763 0.44680
   2  -2   638995.56 1684.90   1 0.29875-0.15242 0.63933-0.88889 0.70851-0.43200
  -2   2  -634291.01 1493.96   1 0.75389-0.89982 0.64910-0.39955-0.10147-0.17511
   2   2   633474.80 1581.00   1 0.74638-0.60052 0.43910-0.18952-0.50009 0.77681
  -2   2  -639734.77 1837.16   1 0.15214-0.29810-0.52080 0.76996-0.84000 0.56417
  -2  -2  -640406.26 1854.49   1 0.62629-0.77261-0.77559 0.52624 0.07878-0.35515
   2   2   632281.88 1446.78   1 0.29760-0.15171 0.77154-0.52251-0.56227 0.83902
  -2   2  -636066.37 1643.88   1 0.72660-0.87232-0.01720 0.26660-0.68683 0.40984
  -2  -2  -636531.56 1589.51   1 0.71739-0.86311 0.03274-0.28212-0.69589 0.41885
   2  -2   7261078.6 6306.98   1 0.37266-0.22187 0.67266-0.92222 0.63924-0.31664
  -2   2  -7230632.5 5587.32   1 0.76268-0.91305 0.62544-0.37593-0.16472-0.15810
   2   2   7231202.0 5733.76   1 0.75917-0.60893 0.48430-0.23472-0.43484 0.75769
  -2   2  -7252634.0 6213.49   1 0.18776-0.33817-0.55528 0.80443-0.81018 0.48838
  -2  -2  -7246431.8 6063.53   1 0.61812-0.76892-0.78566 0.53631 0.02559-0.34803
   2   2   7231296.0 5594.60   1 0.14188 0.00863 0.88018-0.63102-0.45292 0.77571
  -2  -2  -7218410.6 5280.98   1 0.69726-0.84737 0.11746-0.36683-0.70712 0.38391
  -2   2  -7241257.8 5919.54   1 0.73276-0.88288-0.05819 0.30760-0.67798 0.35482
   2  -2   820967.53 1822.55   1 0.41613-0.26088 0.68941-0.93897 0.59290-0.22422
  -2   2  -825775.80 2227.29   1 0.76731-0.92209 0.60433-0.35482-0.21450-0.15443
   2   2   829673.70 2314.39   1 0.76652-0.61189 0.52251-0.27293-0.37339 0.74235
  -2   2  -828119.75 2647.00   1 0.21513-0.36999-0.58091 0.83006-0.78501 0.41724
  -2  -2  -820218.03 1814.81   1 0.60957-0.76478-0.79243 0.54298-0.02165-0.34678
   2   2   825723.24 2226.53   1-0.00621 0.16084 0.94302-0.69373-0.33265 0.70203
  -2  -2  -816915.56 1466.97   1 0.67522-0.82972 0.19089-0.44027-0.71247 0.34309
  -2   2  -826017.34 2280.52   1 0.73666-0.89117-0.09010 0.33951-0.67023 0.30090
   2  -2   977810.87 1983.17   1 0.44189-0.28214 0.69822-0.94782 0.56320-0.14838
  -2   2  -963630.22 1644.54   1 0.76947-0.92865 0.58487-0.33536-0.25655-0.15850
   2   2   969067.39 1989.84   1 0.76969-0.61051 0.55488-0.30536-0.31570 0.73076
  -2   2  -969257.35 2007.26   1 0.23588-0.39518-0.59981 0.84896-0.76457 0.35083
  -2  -2  -978448.14 2191.72   1 0.60031-0.76000-0.79715 0.54770-0.06462-0.34986
   2   2   967038.14 1694.81   1-0.13959 0.29860 0.96688-0.71759-0.21364 0.62919
  -2  -2  -962171.75 1562.52   1 0.65382-0.81271 0.25121-0.50058-0.71372 0.29816
  -2   2  -971120.54 1908.07   1 0.73904-0.89794-0.11384 0.36324-0.66397 0.24848
   2  -2  1045721.48 1645.44   1 0.45683-0.29261 0.70291-0.95251 0.54517-0.08426
   2   2  1034309.17 1458.98   1 0.76961-0.60603 0.58266-0.33315-0.26113 0.72230
  -2   2 -1034333.41 2501.22   1 0.25131-0.41506-0.61356 0.86271-0.74858 0.28886
  -2  -2 -1047414.64 1845.92   1 0.59069-0.75486-0.80012 0.55068-0.10429-0.35625
  -2  -2 -1036112.98 1263.76   1 0.63415-0.79750 0.29907-0.54838-0.71302 0.25152
  -2   2 -1037430.01 1420.75   1 0.74043-0.90373-0.13029 0.37969-0.65938 0.19773
   2  -2  11 9843.79  950.97   1 0.46455-0.29586 0.70520-0.95480 0.53560-0.02860
   2   2  11 7849.59 1031.46   1 0.76694-0.59896 0.60656-0.35704-0.20947 0.71677
  -2   2 -11 6529.06  835.94   1 0.26246-0.43065-0.62332 0.87247-0.73659 0.23090
  -2  -2 -11 9104.90 1053.41   1 0.58075-0.74941-0.80170 0.55225-0.14138-0.36522
  -2  -2 -11 6602.48  608.63   1 0.61917-0.78690 0.33329-0.58259-0.71101 0.20336
  -2   2 -11 7055.17  745.99   1 0.74116-0.90886-0.14028 0.38968-0.65649 0.14868
  -2  -2 -11 8484.86  804.51   1 0.35262-0.52147-0.93576 0.68644-0.00013-0.50681
   2  -2  1222238.04 2168.90   1 0.46720-0.29404 0.70596-0.95556 0.53228 0.02080
   2   2  1216280.08 2000.37   1 0.76217-0.58978 0.62718-0.37767-0.16038 0.71379
  -2   2 -1216556.95 2220.72   1 0.27011-0.44275-0.62995 0.87910-0.72814 0.17648
  -2  -2 -1224191.96 1075.82   1 0.57052-0.74366-0.80210 0.55265-0.17644-0.37621
  -2   2 -1218040.91 2022.86   1 0.74145-0.91355-0.14450 0.39390-0.65525 0.10127
  -2  -2 -1221163.15 2288.92   1 0.43245-0.60561-0.89707 0.64778-0.09076-0.46216
   2  -2  1354500.65 3257.42   1 0.46609-0.28846 0.70564-0.95524 0.53367 0.06550
   2   2  1360397.92 3789.03   1 0.75591-0.57916 0.64470-0.39514-0.11376 0.71304
  -2   2 -1352322.49 3561.32   1 0.27489-0.45198-0.63405 0.88320-0.72277 0.12514
  -2  -2 -1353441.80 3295.06   1 0.55998-0.73760-0.80148 0.55203-0.20987-0.38884
  -2   2 -1359211.65 3566.68   1 0.74139-0.91788-0.14355 0.39295-0.65553 0.05538
  -2  -2 -1344039.35 2607.21   1 0.49998-0.67762-0.84861 0.59932-0.17282-0.42618
   2  -2  1437459.01 2448.56   1 0.46207-0.27997 0.70447-0.95407 0.53870 0.10657
   2   2  1435149.82 2448.17   1 0.74792-0.56676 0.66020-0.41064-0.06887 0.71424
  -2   2 -1434273.48 2623.22   1 0.27728-0.45881-0.63608 0.88523-0.72007 0.07646
  -2  -2 -1437552.40 2557.47   1 0.54913-0.73123-0.79994 0.55049-0.24196-0.40280
  -2   2 -1436206.57 2398.39   1 0.74099-0.92188-0.13789 0.38729-0.65719 0.01088
   2  -2  15 1165.94  418.65   1 0.45568-0.26912 0.70256-0.95216 0.54658 0.14478
   2   2  15 1002.11  461.24   1 0.73862-0.55306 0.67362-0.42406-0.02566 0.71713
  -2   2 -15  862.58  256.79   1 0.27762-0.46360-0.63637 0.88553-0.71968 0.03010
  -2  -2 -15  770.75  665.43   1 0.53775-0.72392-0.79796 0.54877-0.27215-0.41806
  -2   2 -15 2136.53  375.25   1 0.74024-0.92552-0.12788 0.37729-0.66006-0.03240
   2  -2  1644873.11 3481.88   1 0.44731-0.25627 0.69996-0.94956 0.55674 0.18071
  -2   2 -1650019.14 5080.90   1 0.27621-0.46664-0.63517 0.88433-0.72128-0.01426
  -2  -2 -1647750.34 3825.44   1 0.52629-0.71691-0.79478 0.54559-0.30222-0.43401
  -2   2 -1648506.85 3753.45   1 0.73903-0.92872-0.11378 0.36318-0.66398-0.07465
   2  -2  17 6452.58  975.12   1 0.43728-0.24182 0.69669-0.94625 0.56868 0.21477
   2   2  17 6419.50 1178.13   1 0.71662-0.52225 0.69516-0.44560 0.05655 0.72710
  -2   2 -17 5322.75 1033.97   1 0.27327-0.46814-0.63266 0.88181-0.72460-0.05691
  -2  -2 -17 6761.27 1251.11   1 0.51446-0.70954-0.79083 0.54164-0.33151-0.45073
   2   2  18 5443.95  654.95   1 0.70408-0.50530 0.70360-0.45405 0.09593 0.73382
  -2   2 -18 5766.69 1080.87   1 0.26897-0.46828-0.62896 0.87811-0.72942-0.09807
  -2  -2 -18 7328.45  770.30   1 0.50226-0.70180-0.78614 0.53696-0.36013-0.46813
  -2  -3  18 9241.11 2190.20   1 0.21067-0.24982 0.59265-0.96688 0.77741 0.05216
  -2   3  1813008.48 1652.02   1 0.66189-0.70106 0.72062-0.34615 0.20640 0.62343
   2   3 -1811031.88 2240.68   1 0.24009-0.20082-0.60359 0.97731-0.76028-0.06720
   2  -3 -1813872.60 1749.11   1 0.58895-0.55023-0.80050 0.42633-0.11102-0.71796
   2   3 -1815770.77 1864.79   1 0.74095-0.70225-0.30002 0.67415-0.60081-0.22883
  -2  -3  17 2239.77  520.46   1 0.21093-0.25456 0.59281-0.96703 0.77722 0.00626
  -2   3  17 2211.74  652.75   1 0.67400-0.71764 0.71709-0.34263 0.17745 0.60628
   2   3 -17 1972.14  647.25   1 0.24275-0.19904-0.60596 0.97969-0.75754-0.02398
   2  -3 -17 2899.49  828.35   1 0.59955-0.55636-0.79744 0.42327-0.06788-0.71505
   2   3 -17 1263.86  661.58   1 0.73967-0.69650-0.31772 0.69185-0.59323-0.19032
  -2  -3  16 6882.80 1802.63   1 0.20847-0.25656 0.59140-0.96563 0.77895-0.04155
  -2   3  16 4804.39  990.92   1 0.68546-0.73357 0.71284-0.33838 0.14826 0.58937
   2   3 -16 5639.91 1408.97   1 0.24363-0.19547-0.60675 0.98048-0.75663 0.02108
   2  -3 -16 8716.91 1785.07   1 0.60928-0.56160-0.79261 0.41844-0.02309-0.71379
   2   3 -16 7795.03 1516.81   1 0.73834-0.69069-0.33307 0.70720-0.58643-0.15102
   2  -3 -16 8945.83 1292.69   1 0.31928-0.27173-0.94698 0.57300 0.03581-0.77319
  -2  -3  15  859.80  313.51   1 0.20296-0.25551 0.58824-0.96246 0.78280-0.09148
  -2   3  15 2244.85  706.04   1 0.69629-0.74886 0.70785-0.33339 0.11878 0.57275
   2   3 -15 2291.80  595.09   1 0.24246-0.18985-0.60570 0.97943-0.75784 0.06826
   2  -3 -15 1454.77  514.59   1 0.61776-0.56551-0.78600 0.41198 0.02354-0.71446
   2   3 -15 3031.00  777.96   1 0.73704-0.68492-0.34601 0.72014-0.58054-0.11081
  -2  -3  1425682.63 2121.20   1 0.19397-0.25099 0.58303-0.95725 0.78895-0.14372
   2   3 -1422307.33 2147.95   1 0.23888-0.18183-0.60250 0.97623-0.76152 0.11791
   2  -3 -1426598.12 2024.13   1 0.62539-0.56866-0.77695 0.40293 0.07226-0.71712
   2   3 -1428454.18 2161.37   1 0.73588-0.67928-0.35644 0.73056-0.57569-0.06958
  -2  -3  1341100.07 3237.11   1 0.18103-0.24251 0.57541-0.94963 0.79757-0.19843
  -2   3  1345969.09 3041.31   1 0.71573-0.77799 0.69583-0.32150 0.05949 0.53977
   2   3 -1347955.85 3792.79   1 0.23243-0.17093-0.59670 0.97043-0.76806 0.17042
   2  -3 -1348438.89 3253.12   1 0.63170-0.57049-0.76534 0.39131 0.12328-0.72208
  -2   3  1347975.98 3167.75   1-0.15506 0.09250 0.96763-0.59369-0.19911 0.79935
   2   3 -1350870.51 3393.40   1 0.73495-0.67387-0.36421 0.73834-0.57200-0.02717
  -2  -3  1214206.41 1721.57   1 0.16354-0.22949 0.56488-0.93910 0.80880-0.25574
  -2   3  1214264.40 1816.19   1 0.72470-0.79137 0.68845-0.31412 0.02871 0.52445
   2   3 -1213821.56 2273.85   1 0.22250-0.15656-0.58767 0.96140-0.77789 0.22623
   2  -3 -1214274.96 1804.82   1 0.63647-0.57078-0.75075 0.37672 0.17683-0.72957
  -2   3  1212376.16 1507.41   1-0.09586 0.02893 0.96247-0.58853-0.25388 0.80795
   2   3 -1214671.28 1909.99   1 0.73432-0.66878-0.36914 0.74327-0.56963 0.01654
  -2  -3  1124296.78 1518.40   1 0.14081-0.21122 0.55082-0.92505 0.82265-0.31568
  -2   3  1118343.87 2097.33   1 0.73304-0.80411 0.68017-0.30583-0.00268 0.50976
   2   3 -1118691.83 2682.48   1 0.20829-0.13790-0.57458 0.94831-0.79149 0.28580
   2  -3 -1121365.66 2384.95   1 0.63937-0.56920-0.73268 0.35866 0.23316-0.73983
  -2   3  1114803.70 1955.73   1-0.03466-0.03665 0.95069-0.57675-0.30819 0.81609
   2   3 -1118890.88 2164.80   1 0.73409-0.66406-0.37099 0.74511-0.56874 0.06174
  -2  -3  10 9406.54 1419.40   1 0.11206-0.18693 0.53245-0.90668 0.83900-0.37812
  -2   3  1014862.09 1456.59   1 0.74073-0.81620 0.67089-0.29655-0.03486 0.49584
   2   3 -1017788.24 2069.22   1 0.18874-0.11391-0.55622 0.92994-0.80931 0.34959
   2  -3 -1010252.01 1117.06   1 0.63980-0.56524-0.71077 0.33678 0.29229-0.75303
  -2   3  1013425.28 1911.97   1 0.02798-0.10315 0.93161-0.55788-0.36235 0.82348
   2   3 -1017310.60 1773.27   1 0.73429-0.65979-0.36943 0.74355-0.56950 0.10859
  -2  -3   922409.08 1861.55   1 0.07647-0.15581 0.50880-0.88303 0.85747-0.44268
  -2   3   920429.71 1782.21   1 0.74774-0.82762 0.66049-0.28616-0.06797 0.48285
   2   3  -924958.16 2400.49   1 0.16245-0.08318-0.53092 0.90465-0.83170 0.41795
  -2   3   920410.81 1919.39   1 0.09207-0.17167 0.90546-0.53172-0.41432 0.82933
   2   3  -923371.16 2041.77   1 0.73496-0.65599-0.36407 0.73819-0.57207 0.15725
  -2  -3   872388.45 1939.19   1 0.03343-0.11713 0.47926-0.85340 0.87703-0.50791
  -2   3   875696.67 2126.57   1 0.75403-0.83831 0.64882-0.27449-0.10226 0.47104
   2   3  -873196.87 2248.24   1 0.12775-0.04391-0.49670 0.86996-0.85846 0.49115
  -2   3   868631.17 2024.00   1 0.15677-0.24080 0.87177-0.49803-0.46414 0.83304
   2   3  -880226.01 2319.83   1 0.73611-0.65267-0.35443 0.72855-0.57663 0.20790
  -2  -3   7123986.4 3192.15   1-0.01793-0.07024 0.44168-0.81583 0.89698-0.57400
  -2   3   7108948.6 2875.49   1 0.75929-0.84805 0.63595-0.26168-0.13796 0.46078
   2   3  -7106631.2 2774.44   1 0.08219 0.00606-0.44977 0.82303-0.88934 0.56795
  -2   3   7100540.5 2785.38   1 0.22132-0.31010 0.83082-0.45728-0.51062 0.83350
  -2  -3   675923.39 3662.61   1-0.07764-0.01500 0.39545-0.76959 0.91519-0.63835
  -2   3   661759.41 3034.88   1 0.76388-0.85704 0.62100-0.24673-0.17561 0.45232
   2   3  -657213.21 2727.11   1 0.02344 0.06923-0.38649 0.75975-0.92199 0.64651
   2  -3  -671563.51 3461.18   1 0.60658-0.51442-0.56499 0.19110 0.55931-0.83597
  -2   3   659949.72 2895.96   1 0.28481-0.37798 0.78233-0.40879-0.55391 0.83066
   2   3  -664153.38 3214.67   1 0.73951-0.64711-0.31979 0.69391-0.59233 0.31578
  -2  -3   5 8220.12  882.78   1-0.14524 0.04812 0.33934-0.71340 0.92938-0.69910
  -2   3   511526.32 1096.16   1 0.76739-0.86495 0.60381-0.22954-0.21568 0.44627
   2   3  -512089.88 1154.76   1-0.05018 0.14722-0.30227 0.67621-0.95189 0.72184
  -2  -3   5 7304.36  664.03   1 0.38970-0.48671-0.72259 0.34866-0.57095 0.80096
   2  -3  -5 6142.89  635.45   1 0.58473-0.48801-0.50883 0.13494 0.63179-0.86233
  -2   3   512918.78 1771.19   1 0.34622-0.44378 0.72713-0.35358-0.59280 0.82342
   2   3  -511460.71 1151.61   1 0.74136-0.64449-0.29321 0.66734-0.60365 0.37319
  -2  -3   493402.58 2341.58   1-0.21890 0.11731 0.27442-0.64847 0.93636-0.75213
  -2   3   493068.50 2401.62   1 0.76955-0.87151 0.58374-0.20947-0.25890 0.44337
   2   3  -494953.76 2349.06   1-0.13991 0.24141-0.19388 0.56783-0.97099 0.78694
  -2  -3   487167.55 6456.90   1 0.31260-0.41406-0.66472 0.29080-0.67854 0.86254
   2  -3  -489418.89 2320.68   1 0.55511-0.45385-0.44308 0.06914 0.70393-0.88838
  -2   3   496130.15 2480.46   1 0.40496-0.50688 0.66604-0.29221-0.62640 0.81097
   2   3  -4107280.6 2830.28   1 0.74282-0.64148-0.25918 0.63331-0.61727 0.43291
  -2  -3   3 2576.97  312.35   1-0.29612 0.19006 0.20126-0.57532 0.93370-0.79553
  -2   3   3 3948.01  460.26   1 0.76989-0.87625 0.55985-0.18558-0.30631 0.44466
  -2  -3   3 2099.90  348.66   1 0.21220-0.31816-0.57821 0.20448-0.78780 0.92572
   2  -3  -3 2168.73  378.77   1 0.51701-0.41118-0.36725-0.00668 0.77318-0.91152
  -2  -3   3 2350.15  281.89   1 0.24221-0.34815 0.06180-0.43583 0.96825-0.82995
  -2   3   3 4393.46  489.44   1 0.45908-0.56539 0.60061-0.22677-0.65460 0.79303
   2   3  -3 4716.78  631.45   1 0.74415-0.63801-0.21723 0.59134-0.63169 0.49319
  -2   3   2241752.4 2198.10   1 0.76762-0.87839 0.53064-0.15637-0.35939 0.45162
   2   3  -2237122.7 2176.57   1 0.37265-0.26190-0.12202 0.49662-0.91991 0.82750
   2  -3  -2231251.8 2127.20   1 0.46992-0.35951-0.28217-0.09176 0.83638-0.92861
  -2  -3   2231656.4 1967.50   1 0.34772-0.45811-0.08710-0.28692 0.93354-0.84131
  -2   3   133605.40 1496.71   1 0.76130-0.87645 0.49368-0.11931-0.42034 0.46646
   2  -3  -154288.05 2351.97   1 0.52826-0.41307 0.05910-0.43368-0.84702 0.80080
   2   3  -135281.33 1613.22   1 0.44676-0.33160-0.03972 0.41432-0.89376 0.84756
  -2  -3   155941.42 2407.33   1-0.04251-0.07233-0.31120-0.06274-0.94939 0.99540
  -2  -3   158682.28 2534.73   1 0.44363-0.55859-0.23732-0.13670 0.86421-0.81809
   2  -3  -159116.36 2592.33   1 0.41450-0.29954-0.18985-0.18417 0.89002-0.93613
  -2   3   140044.07 1857.05   1 0.55198-0.66709 0.46303-0.08908-0.69347 0.73962
  -2   3   093303.87 2362.38   1 0.74834-0.86788 0.44521-0.07084-0.49168 0.49168
   2   3   094418.40 2438.38   1 0.51494-0.39539 0.04202 0.33255-0.85619 0.85619
   2  -3   0100986.5 2513.63   1 0.41742-0.29786-0.07314-0.30144-0.90576 0.90576
  -2  -3   0104258.4 2613.67   1 0.51963-0.63919-0.37222-0.00171 0.76904-0.76904
   2  -3   0105248.3 2681.68   1 0.35208-0.23255-0.09359-0.28043 0.93127-0.93127
  -2   3   0105700.1 2772.94   1 0.58962-0.70911 0.39448-0.02053-0.70479 0.70479
   2   3   092791.20 2416.53   1 0.72806-0.60873-0.02615 0.40025-0.68500 0.68500
  -2   3  -176607.42 1902.61   1-0.25451 0.13057 0.24137 0.13268 0.93646-0.98251
  -2   3  -176956.14 1950.07   1 0.72377-0.84767 0.37900-0.00459-0.57662 0.53049
   2   3   179330.85 2092.70   1 0.57406-0.45016 0.12068 0.25390-0.80986 0.85608
  -2  -3  -176684.57 1958.30   1 0.57330-0.69737-0.48230 0.10841 0.66234-0.70845
   2   3   173160.47 1848.99   1 0.28965-0.16571-0.00355 0.37758 0.95712-0.91102
   2  -3   174515.42 1944.59   1 0.28547-0.16152 0.00232-0.37635 0.95838-0.91228
  -2   3  -181691.17 2188.52   1 0.62137-0.74525 0.32840 0.04555-0.71136 0.66521
   2   3   175528.68 1982.72   1 0.71119-0.58742 0.06148 0.31257-0.70030 0.74647
  -2   3  -243643.33 1868.95   1-0.03020-0.09828 0.43241-0.05826 0.90117-0.99345
  -2   3  -245832.81 1981.58   1 0.67888-0.80716 0.28653 0.08787-0.67602 0.58375
   2   3   247371.35 2163.87   1 0.62382-0.49557 0.19389 0.18068-0.75712 0.84956
  -2  -3  -248716.23 2130.30   1 0.60719-0.73582-0.56670 0.19281 0.55692-0.64913
   2   3   242672.85 1856.65   1 0.38000-0.25132-0.13583 0.50985 0.91495-0.82272
   2  -3   246525.29 2056.21   1 0.21819-0.08974 0.09392-0.46796 0.97137-0.87917
  -2   3  -245666.47 2050.58   1 0.64753-0.77580 0.26624 0.10770-0.71400 0.62170
   2   3   243730.55 1934.95   1 0.68462-0.55647 0.16130 0.21275-0.71081 0.80316
  -2   3  -354580.84 2565.85   1 0.22261-0.35553 0.59940-0.22517 0.76886-0.90713
   2   3   358939.57 2875.33   1 0.66412-0.53147 0.26010 0.11430-0.70091 0.83932
  -2   3  -357629.13 2722.45   1 0.60090-0.73351 0.15921 0.21537-0.78330 0.64464
  -2   3  -352904.28 2545.88   1-0.15318 0.02053-0.17722 0.55117-0.97217 0.83413
  -2  -3  -351758.85 2492.33   1 0.62668-0.75963-0.62898 0.25499 0.46004-0.59827
   2   3   351294.41 2468.19   1 0.64546-0.51281 0.27147 0.10247-0.71391 0.85236
  -2   3  -353843.69 2615.01   1 0.66907-0.80161 0.20915 0.16491-0.71316 0.57464
  -2   3  -422290.00 1911.68   1 0.44023-0.57764 0.69768-0.32329 0.56517-0.74954
   2   3   419568.80 1780.56   1 0.69625-0.55923 0.31971 0.05469-0.64265 0.82720
  -2   3  -421534.13 1854.60   1 0.48238-0.61956 0.00249 0.37209-0.87595 0.69115
  -2   3  -421500.53 1965.08   1-0.09336-0.04374-0.25102 0.62497-0.96346 0.77941
  -2  -3  -423395.40 2061.16   1 0.63641-0.77386-0.67526 0.30127 0.37281-0.55710
   2   3   420196.82 1767.21   1 0.59252-0.45548 0.38878-0.01482-0.70551 0.89011
  -2   3  -420225.93 1807.35   1 0.68567-0.82261 0.15786 0.21620-0.71058 0.52588
  -2   3  -5118184.0 2869.40   1 0.58586-0.72773 0.72719-0.35273 0.35769-0.58820
  -2   3  -5125992.1 3063.47   1 0.33645-0.47804-0.15985 0.53444-0.92803 0.69702
  -2   3  -5126100.6 3214.68   1-0.03996-0.10158-0.31415 0.68809-0.94853 0.71847
  -2  -3  -5154530.0 3864.78   1 0.63977-0.78170-0.70957 0.33558 0.29528-0.52565
   2   3   5129269.3 3205.88   1 0.52393-0.38247 0.50837-0.13454-0.68340 0.91411
  -2   3  -5122248.2 3106.07   1 0.69852-0.83985 0.11276 0.26130-0.70664 0.47577
   2  -3   654051.21 2552.33   1-0.19349 0.33977 0.29733-0.67139 0.93496-0.65862
  -2   3  -668862.39 3242.42   1 0.66976-0.81609 0.71843-0.34397 0.18779-0.46441
  -2   3  -672959.07 3526.72   1 0.00617-0.15184-0.36731 0.74057-0.93007 0.65459
  -2  -3  -653116.25 2597.12   1 0.63914-0.78546-0.73502 0.36100 0.22634-0.50271
   2   3   677466.43 3676.69   1 0.44067-0.29482 0.62391-0.25007-0.64539 0.92224
  -2   3  -676510.35 3682.47   1 0.70829-0.85401 0.07398 0.30007-0.70202 0.42499
   2  -3   752918.99 1334.58   1-0.06736 0.21825 0.40360-0.77774 0.91244-0.58946
  -2   3  -756897.12 1439.04   1 0.71533-0.86567 0.69613-0.32179 0.06080-0.38348
   2   3   760874.41 1792.92   1 0.75285-0.60261 0.46019-0.08582-0.47055 0.79340
  -2   3  -757669.87 2012.23   1 0.04552-0.19561-0.41064 0.78390-0.91065 0.58926
  -2  -3  -754335.61 1565.10   1 0.63554-0.78634-0.75435 0.38033 0.16441-0.48684
   2   3   755932.78 1502.35   1 0.34391-0.19363 0.72936-0.35581-0.59139 0.91427
  -2   3  -758510.34 1622.27   1 0.71558-0.86569 0.04144 0.33262-0.69729 0.37408
   2  -3   835378.30 1241.45   1 0.03130 0.12406 0.47774-0.85188 0.87794-0.50881
  -2   3  -836734.13 1297.65   1 0.74140-0.89614 0.66998-0.29565-0.03785-0.33092
   2   3   838809.19 1612.41   1 0.76187-0.60724 0.49637-0.12200-0.41612 0.78509
  -2   3  -839079.58 1767.48   1 0.07835-0.23286-0.44574 0.81899-0.89172 0.52441
  -2  -3  -834250.58 1380.42   1 0.63002-0.78530-0.76898 0.39496 0.10826-0.47675
   2   3   835341.87 1263.67   1 0.23845-0.08378 0.81855-0.44500-0.52259 0.89159
  -2   3  -835971.50 1424.09   1 0.72092-0.87542 0.01489 0.35916-0.69285 0.32346
  -2  -3  -828657.79 1044.72   1 0.72796-0.88247-0.02553-0.34856-0.68513 0.31581
   2  -3   923011.81 2123.74   1 0.10510 0.05460 0.52791-0.90213 0.84276-0.42798
  -2   3  -926032.94 2306.43   1 0.75626-0.91540 0.64391-0.26957-0.11594-0.29893
   2   3   928006.02 2611.39   1 0.76731-0.60813 0.52814-0.15387-0.36371 0.77877
  -2   3  -930611.06 2932.83   1 0.10533-0.26425-0.47384 0.84710-0.87428 0.46106
  -2  -3  -921037.11 1948.21   1 0.62314-0.78290-0.78003 0.40601 0.05684-0.47139
   2   3   925699.91 2566.80   1 0.12780 0.03158 0.88778-0.51404-0.44216 0.85718
  -2   3  -928219.19 2556.57   1 0.72468-0.88359-0.00592 0.38003-0.68905 0.27356
   2  -3  1036754.06 1278.59   1 0.15931 0.00485 0.56230-0.93652 0.81143-0.35056
   2   3  1026120.20 1260.24   1 0.76976-0.60618 0.55630-0.18203-0.31303 0.77421
  -2   3 -1028693.41 1443.81   1 0.12716-0.29050-0.49610 0.86936-0.85889 0.39976
   2   3  1026370.49  934.64   1 0.01680 0.14701 0.93546-0.56172-0.35303 0.81415
  -2   3 -1027565.91 1051.61   1 0.72731-0.89061-0.02147 0.39558-0.68597 0.22431
   2  -3  1124316.75 1188.93   1 0.19841-0.02977 0.58561-0.95983 0.78593-0.27896
   2   3  1121312.19 2679.35   1 0.76969-0.60171 0.58120-0.20693-0.26414 0.77144
  -2   3 -1121632.36 3216.00   1 0.14453-0.31229-0.51350 0.88675-0.84582 0.34078
  -2  -3 -1127390.13 1429.28   1 0.60680-0.77546-0.79407 0.41990-0.03508-0.47152
   2   3  1116981.51 1806.93   1-0.09037 0.25815 0.96167-0.58774-0.25885 0.76675
  -2   3 -1120900.78 2514.17   1 0.72899-0.89669-0.03207 0.40618-0.68376 0.17595
   2  -3  1248073.14 2864.51   1 0.22607-0.05296 0.60132-0.97554 0.76635-0.21330
   2   3  1253270.08 3339.00   1 0.76748-0.59509 0.60325-0.22898-0.21692 0.77034
  -2   3 -1253510.82 3895.13   1 0.15784-0.33047-0.52640 0.90013-0.83545 0.28378
  -2  -3 -1254260.41 3351.26   1 0.59745-0.77059-0.79821 0.42404-0.07687-0.47579
  -2   3 -1252859.26 3195.98   1 0.72990-0.90200-0.03805 0.41216-0.68248 0.12850
   2  -3  13 6304.20 1096.39   1 0.24499-0.06742 0.61168-0.98591 0.75220-0.15306
   2   3  13 6335.90  994.14   1 0.76341-0.58662 0.62279-0.24852-0.17125 0.77078
  -2   3 -13 6732.75 1050.74   1 0.16803-0.34511-0.53634 0.91007-0.82710 0.22946
  -2  -3 -13 5147.36  865.60   1 0.58752-0.76514-0.80077 0.42660-0.11648-0.48223
  -2   3 -13 7980.61  996.16   1 0.73015-0.90664-0.03973 0.41384-0.68212 0.08197
   2  -3  1410413.84 1971.34   1 0.25713-0.07510 0.61816-0.99239 0.74280-0.09757
   2   3  1414375.83 1320.10   1 0.75797-0.57681 0.63976-0.26543-0.12717 0.77254
  -2   3 -1412751.89 1679.87   1 0.17536-0.35689-0.54343 0.91715-0.82093 0.17732
  -2  -3 -1411956.83 1060.97   1 0.57709-0.75919-0.80197 0.42780-0.15426-0.49051
  -2   3 -1414533.42 1177.68   1 0.72980-0.91069-0.03737 0.41148-0.68263 0.03632
   2   3  1523502.67 2006.03   1 0.75084-0.56527 0.65509-0.28076-0.08418 0.77565
  -2   3 -1524148.52 2599.54   1 0.18020-0.36618-0.54807 0.92180-0.81678 0.12720
  -2  -3 -1527916.90 2360.66   1 0.56618-0.75276-0.80196 0.42779-0.19049-0.50033
  -2   3 -1528108.42 2265.54   1 0.72885-0.91414-0.03119 0.40529-0.68395-0.00852
   2   3  1627665.87 1842.43   1 0.74239-0.55242 0.66862-0.29429-0.04231 0.77988
  -2   3 -1623083.78 3101.43   1 0.18286-0.37328-0.55062 0.92435-0.81447 0.07892
  -2  -3 -1627340.05 1800.79   1 0.55481-0.74587-0.80085 0.42668-0.22541-0.51147
  -2   3 -1624110.15 1468.32   1 0.72729-0.91697-0.02134 0.39545-0.68599-0.05264
   2   3  17 2938.03  817.18   1 0.73273-0.53836 0.68051-0.30617-0.00145 0.78512
  -2   3 -17 6644.07 1050.85   1 0.18359-0.37846-0.55132 0.92505-0.81383 0.03231
  -2  -3 -17 5175.57  773.38   1 0.54283-0.73790-0.79914 0.42536-0.25826-0.52398
  -2   3 -17 9425.89  665.39   1 0.72503-0.91912-0.00795 0.38206-0.68866-0.09614
  -2  -4  16 2179.69  566.55   1 0.04547-0.09333 0.48778-0.98663 0.87177-0.13353
  -2   4  16 2462.74  812.19   1 0.69994-0.74898 0.70597-0.20686 0.10810 0.62946
   2   4 -16 2401.08  696.17   1 0.12248-0.07397-0.49137 0.98905-0.86229 0.12767
   2  -4 -16 3032.42  814.94   1 0.61924-0.57147-0.78453 0.28584 0.03224-0.76923
   2   4 -16 2006.65  682.01   1 0.74411-0.69513-0.21232 0.71113-0.63341-0.10522
  -2  -4  1515545.83 1907.77   1 0.03465-0.08699 0.48013-0.97899 0.87650-0.18440
  -2   4  1514445.36 1461.94   1 0.71006-0.76351 0.69984-0.20073 0.07766 0.61380
   2   4 -1512452.94 2333.83   1 0.11548-0.06256-0.48425 0.98193-0.86726 0.17856
   2  -4 -1519885.92 1841.48   1 0.62641-0.57415-0.77541 0.27671 0.07964-0.77056
   2   4 -1517942.74 1719.44   1 0.74418-0.69080-0.22153 0.72034-0.63016-0.06230
  -2  -4  14 2365.84  683.57   1 0.02008-0.07690 0.46969-0.96854 0.88260-0.23663
  -2   4  14 2413.69  624.49   1 0.71950-0.77735 0.69290-0.19379 0.04690 0.59846
   2   4 -14 4096.22 1056.46   1 0.10546-0.04812-0.47398 0.97166-0.87419 0.23140
   2  -4 -14 3084.78  919.25   1 0.63227-0.57554-0.76398 0.26528 0.12868-0.77354
  -2   4  14 4415.73  918.22   1-0.11501 0.05684 0.96482-0.46624-0.23641 0.88282
   2   4 -14 3676.74  884.67   1 0.74418-0.68641-0.22816 0.72697-0.62779-0.01851
  -2  -4  1318321.15 1741.79   1 0.00141-0.06270 0.45607-0.95493 0.88993-0.29011
  -2   4  1316124.61 1408.08   1 0.72824-0.79050 0.68513-0.18602 0.01575 0.58351
   2   4 -1314912.97 1934.92   1 0.09195-0.03019-0.45999 0.95767-0.88314 0.28627
   2  -4 -1317211.05 1484.78   1 0.63666-0.57545-0.74996 0.25127 0.17948-0.77827
  -2   4  1311725.25 1503.53   1-0.05638-0.00616 0.95561-0.45703-0.28918 0.88942
   2   4 -1317690.11 1502.16   1 0.74417-0.68200-0.23206 0.73087-0.62637 0.02622
  -2  -4  12 1729.44  348.89   1-0.02169-0.04407 0.43885-0.93770 0.89829-0.34461
  -2   4  12 3400.01  783.11   1 0.73629-0.80296 0.67647-0.17736-0.01585 0.56903
   2   4 -12 3871.94  647.90   1 0.07439-0.00821-0.44155 0.93923-0.89414 0.34318
   2  -4 -12 2619.15  776.82   1 0.63934-0.57365-0.73304 0.23435 0.23211-0.78485
  -2   4  12 1758.20  454.50   1 0.00287-0.06981 0.94028-0.44170-0.34037 0.89443
   2   4 -12 3226.94  645.82   1 0.74416-0.67760-0.23308 0.73189-0.62600 0.07202
  -2  -4  1130143.88 2085.16   1-0.04957-0.02067 0.41752-0.91638 0.90731-0.39976
  -2   4  1134958.66 2408.60   1 0.74363-0.81469 0.66686-0.16775-0.04801 0.55509
   2   4 -1134395.77 3135.80   1 0.05212 0.01847-0.41777 0.91545-0.90705 0.40200
   2  -4 -1129205.43 2014.29   1 0.63986-0.56979-0.71308 0.21443 0.28650-0.79331
  -2   4  1132627.99 2289.16   1 0.06216-0.13290 0.91854-0.42023-0.39039 0.89763
   2   4 -1137437.26 2623.72   1 0.74418-0.67321-0.23100 0.72981-0.62676 0.11894
  -2  -4  1017965.20 1320.54   1-0.08248 0.00775 0.39158-0.89043 0.91643-0.45503
  -2   4  1018118.05 1333.03   1 0.75021-0.82568 0.65623-0.15712-0.08082 0.54180
   2   4 -1016799.45 1528.29   1 0.02439 0.05060-0.38755 0.88523-0.92152 0.46238
   2  -4 -1016717.17 1261.96   1 0.63826-0.56370-0.68919 0.19054 0.34295-0.80369
  -2   4  1016312.35 1537.67   1 0.12140-0.19657 0.89111-0.39279-0.43724 0.89837
   2   4 -1018284.26 1403.67   1 0.74419-0.66883-0.22559 0.72439-0.62871 0.16706
  -2  -4   926861.60 1862.17   1-0.12054 0.04132 0.36052-0.85937 0.92492-0.50966
  -2   4   927460.25 1514.91   1 0.75602-0.83589 0.64447-0.14536-0.11441 0.52929
   2   4  -923464.84 2183.17   1-0.00955 0.08898-0.34961 0.84728-0.93684 0.52362
   2  -4  -919825.58 2008.12   1 0.63397-0.55492-0.66113 0.16248 0.40121-0.81587
  -2   4   922799.68 1362.65   1 0.17988-0.25949 0.85790-0.35958-0.48128 0.89630
   2   4  -928300.56 1640.35   1 0.74415-0.66439-0.21654 0.71534-0.63193 0.21645
  -2  -4   827610.61 1054.86   1-0.16373 0.08001 0.32347-0.82222 0.93196-0.56351
  -2   4   832479.87 1281.81   1 0.76075-0.84511 0.63172-0.13270-0.14891 0.51785
   2   4  -832339.24 1118.57   1-0.05029 0.13398-0.30214 0.80073-0.95193 0.58383
   2  -4  -828211.40 1199.39   1 0.62652-0.54298-0.62839 0.12973 0.46106-0.82965
  -2   4   832456.27 1324.46   1 0.23711-0.32150 0.81953-0.32147-0.52166 0.89066
  -2  -4   777315.84 2762.75   1-0.21154 0.12335 0.28111-0.77986 0.93606-0.61367
  -2   4   754500.24 2072.21   1 0.76479-0.85355 0.61726-0.11824-0.18458 0.50740
   2   4  -757065.84 2032.79   1-0.09873 0.18687-0.24454 0.74313-0.96459 0.64251
   2  -4  -771934.39 2639.68   1 0.61542-0.52781-0.59096 0.09244 0.52154-0.84431
  -2   4   755175.77 2207.18   1 0.29236-0.38114 0.77600-0.27794-0.55886 0.88174
   2   4  -765030.31 2511.07   1 0.74353-0.65498-0.18615 0.68495-0.64226 0.31911
  -2  -4   6 4120.39  493.67   1-0.26327 0.17061 0.23306-0.73180 0.93614-0.65981
  -2   4   6 4780.67  584.29   1 0.76779-0.86095 0.60114-0.10212-0.22161 0.49832
   2   4  -6 5610.84  570.82   1-0.15471 0.24731-0.17529 0.67388-0.97228 0.69621
   2  -4  -6 3694.55  520.11   1 0.60009-0.50793-0.54733 0.04881 0.58335-0.86001
  -2   4   6 4854.67  854.47   1 0.34510-0.43827 0.72821-0.23015-0.59212 0.86887
   2   4  -6 6442.51  872.33   1 0.74260-0.64965-0.16399 0.66279-0.64934 0.37235
  -2   4   524395.19 2074.75   1 0.76959-0.86715 0.58306-0.08404-0.26030 0.49089
   2  -4  -531134.76 1288.98   1 0.58000-0.48328-0.49766-0.00085 0.64491-0.87546
  -2  -4   530993.45 1139.00   1 0.21767-0.31461 0.09461-0.59332 0.97142-0.74093
  -2   4   524372.10 2036.52   1 0.39519-0.49272 0.67690-0.17846-0.62097 0.85168
   2   4  -527026.82 2521.29   1 0.74090-0.64355-0.13657 0.63538-0.65757 0.42675
  -2   4   466542.24 2389.66   1 0.76996-0.87192 0.56262-0.06359-0.30101 0.48548
   2   4  -465099.76 2294.09   1 0.37257-0.27063-0.12210 0.62156-0.91993 0.73512
   2  -4  -474597.21 2712.98   1 0.55456-0.45330-0.44192-0.05666 0.70509-0.88955
  -2  -4   471045.94 2456.41   1 0.28528-0.38672 0.00257-0.50129 0.95843-0.77404
  -2   4   474144.98 2672.78   1 0.44129-0.54321 0.62314-0.12470-0.64571 0.83027
   2   4  -472968.57 2701.21   1 0.73805-0.63630-0.10342 0.60222-0.66677 0.48211
  -2   4   341331.29 1248.55   1 0.76857-0.87493 0.53927-0.04025-0.34420 0.48255
   2   4  -344745.76 1273.05   1 0.42812-0.32178-0.06109 0.56055-0.90165 0.76304
   2  -4  -343287.31 1280.73   1 0.52373-0.41790-0.38008-0.11850 0.76238-0.90072
  -2  -4   345534.85 1218.97   1 0.35432-0.46013-0.09693-0.40176 0.93008-0.79174
  -2   4   349670.60 1475.86   1 0.48346-0.58978 0.56790-0.06945-0.66614 0.80457
   2   4  -346953.84 1483.65   1 0.73354-0.62740-0.06403 0.56283-0.67662 0.53812
  -2   4   229892.52 2311.41   1 0.76491-0.87567 0.51228-0.01312-0.39048 0.48272
   2   4  -234069.00 2799.87   1 0.48165-0.37090 0.00162 0.49783-0.87635 0.78395
   2  -4  -226126.26 2023.08   1 0.48741-0.37700-0.31290-0.18568 0.81517-0.90740
  -2  -4   226424.03 1998.76   1 0.42050-0.53088-0.19948-0.29921 0.88508-0.79286
  -2   4   237354.67 3068.58   1 0.52145-0.63216 0.51222-0.01377-0.68242 0.77471
   2   4  -233654.70 2602.39   1 0.72673-0.61619-0.01795 0.51676-0.68668 0.59435
   2   4  -194898.52 2490.91   1 0.53224-0.41705 0.06427 0.43517-0.84414 0.79792
   2  -4  -196277.96 2507.83   1 0.44617-0.33121-0.24156-0.25713 0.86172-0.90783
  -2   4   198849.36 2624.79   1 0.55536-0.67047 0.45723 0.04137-0.69462 0.74077
   2   4  -195618.10 2544.33   1 0.71692-0.60193 0.03502 0.46372-0.69626 0.65009
  -2   4   011867.94  939.74   1 0.74762-0.86716 0.44293 0.05623-0.49484 0.49484
   2   4   012992.15 1148.02   1 0.57768-0.45813 0.12575 0.37368-0.80651 0.80651
  -2  -4   013293.24 1059.23   1 0.52912-0.64868-0.39051-0.10807 0.75334-0.75334
   2  -4   012775.98 1071.39   1 0.40051-0.28097-0.16767-0.33102 0.90081-0.90081
  -2   4   013463.47 1178.39   1 0.58480-0.70430 0.40377 0.09482-0.70353 0.70353
   2   4   011703.46 1006.42   1 0.70304-0.58367 0.09538 0.40336-0.70471 0.70471
  -2   4  -113943.23 1056.65   1-0.18138 0.05744 0.30806 0.19067 0.93391-0.97997
  -2   4  -115128.13 1193.35   1 0.73132-0.85525 0.39744 0.10171-0.55424 0.50812
   2   4   116645.00 1442.01   1 0.61785-0.49395 0.18468 0.31476-0.76429 0.81051
  -2  -4  -116507.51 1304.81   1 0.56808-0.69216-0.47065-0.02786 0.67509-0.72120
   2  -4   115455.12 1236.44   1 0.35185-0.22774-0.09323-0.40546 0.93139-0.88528
  -2   4  -114292.94 1175.77   1 0.61015-0.73404 0.35276 0.14583-0.70940 0.66326
   2   4   115781.33 1282.80   1 0.68413-0.56036 0.16291 0.33583-0.71092 0.75710
  -2   4  -254234.68 1357.87   1-0.02839-0.10009 0.43378 0.06506 0.90056-0.99284
  -2   4  -261732.30 1596.58   1 0.70710-0.83537 0.34190 0.15731-0.61895 0.52668
   2   4   259288.77 1664.72   1 0.65231-0.52403 0.23989 0.25931-0.71898 0.81125
  -2  -4  -271224.03 1861.22   1 0.59667-0.72530-0.53841 0.03989 0.59504-0.68726
  -2   4  -256162.39 1589.04   1 0.63167-0.75994 0.30490 0.19370-0.71275 0.62045
   2   4   255959.73 1566.66   1 0.65907-0.53092 0.23718 0.26157-0.71369 0.80604
  -2   4  -366329.17 1641.98   1 0.14268-0.27560 0.55200-0.05303 0.82154-0.95980
   2   4   376060.35 2088.05   1 0.68153-0.54888 0.29143 0.20778-0.67125 0.80966
  -2   4  -374869.19 1887.83   1 0.67219-0.80484 0.27437 0.22483-0.68765 0.54924
  -2  -4  -364508.43 1714.98   1 0.61647-0.74966-0.59426 0.09574 0.51652-0.65485
   2  -4   369025.36 1845.19   1 0.25174-0.11879 0.04888-0.54759 0.96655-0.82826
   2   4   372849.07 1937.44   1 0.62632-0.49366 0.31726 0.18134-0.71208 0.85053
  -2   4  -4 8582.33  708.23   1 0.31211-0.44950 0.64578-0.14666 0.69681-0.88115
   2   4   4 8957.08  882.24   1 0.70565-0.56863 0.33887 0.16034-0.62226 0.80681
  -2   4  -4 9641.62  839.27   1 0.62339-0.76035 0.19322 0.30622-0.75766 0.57278
  -2  -4  -414096.34 1216.38   1 0.62923-0.76667-0.63918 0.14052 0.44216-0.62646
   2  -4   414172.06 1261.37   1 0.20350-0.06604 0.11326-0.61198 0.97250-0.78811
   2   4   4 8787.14  830.04   1 0.58580-0.44876 0.40186 0.09673-0.70379 0.88839
  -2   4  -4 9656.96  989.56   1 0.66501-0.80195 0.22075 0.27799-0.71345 0.52876
  -2   4  -558403.64 1992.23   1 0.45950-0.60138 0.70371-0.20451 0.54188-0.77234
   2   4   567434.99 2550.74   1 0.72507-0.58360 0.38208 0.11707-0.57294 0.80355
  -2   4  -564754.16 2224.29   1 0.55986-0.70118 0.10107 0.39837-0.82239 0.59130
  -2   4  -562040.83 2210.22   1-0.15801 0.01646-0.17112 0.66971-0.97249 0.74243
  -2  -4  -556209.36 2032.73   1 0.63648-0.77842-0.67571 0.17705 0.37188-0.60225
   2   4   569757.72 2469.76   1 0.53638-0.39495 0.48896 0.00964-0.68789 0.91864
  -2   4  -563878.10 2397.77   1 0.67714-0.81847 0.18504 0.31371-0.71220 0.48133
  -2   4  -6 5307.12  489.84   1 0.57239-0.71873 0.72630-0.22710 0.38059-0.65714
   2   4   6 5767.24  766.24   1 0.74038-0.59452 0.42152 0.07764-0.52359 0.80031
  -2   4  -6 7767.40  732.33   1 0.48290-0.62888 0.00312 0.49633-0.87566 0.59845
  -2   4  -6 8226.00  885.42   1-0.11647-0.02952-0.22290 0.72150-0.96785 0.69178
  -2  -4  -6 9611.58  956.39   1 0.63957-0.78600-0.70506 0.20641 0.30629-0.58273
   2   4   6 6065.39  643.81   1 0.47743-0.33158 0.57619-0.07774-0.66336 0.94021
  -2   4  -6 7960.87  961.23   1 0.68691-0.83263 0.15376 0.34499-0.71028 0.43324
   2   4   757473.40 2097.77   1 0.75201-0.60176 0.45728 0.04187-0.47472 0.79757
  -2   4  -756749.00 1754.90   1 0.39922-0.54962-0.09330 0.59276-0.91209 0.58867
  -2   4  -759968.91 2005.68   1-0.07914-0.07131-0.26808 0.76668-0.96013 0.63805
  -2  -4  -761687.77 2054.31   1 0.63971-0.79051-0.72841 0.22972 0.24530-0.56773
   2   4   759747.55 1917.92   1 0.40974-0.25950 0.66062-0.16217-0.62903 0.95202
  -2   4  -758898.53 2041.18   1 0.69466-0.84477 0.12692 0.37183-0.70804 0.38483
   2   4   818939.02 2152.40   1 0.76041-0.60578 0.48966 0.00949-0.42660 0.79557
  -2   4  -823533.92 2508.20   1-0.04619-0.10871-0.30692 0.80551-0.95061 0.58251
  -2  -4  -813112.62 1511.09   1 0.63725-0.79252-0.74727 0.24858 0.18838-0.55687
   2   4   819516.68 2145.71   1 0.33322-0.17855 0.73954-0.24148-0.58483 0.95383
  -2   4  -821104.54 2341.78   1 0.70071-0.85521 0.10446 0.39429-0.70574 0.33636
   2  -4   956946.59 3340.60   1-0.24085 0.40053 0.25418-0.75292 0.93668-0.52218
   2   4   963293.64 3864.10   1 0.76599-0.60697 0.51895-0.01979-0.37938 0.79447
  -2   4  -964586.33 3865.91   1-0.01763-0.14128-0.34043 0.83811-0.94010 0.52688
  -2  -4  -956484.46 3435.88   1 0.63292-0.79268-0.76232 0.26363 0.13512-0.54968
   2   4   956844.75 3377.70   1 0.25015-0.09109 0.80983-0.31177-0.53065 0.94578
  -2   4  -960568.69 3659.71   1 0.70533-0.86421 0.08626 0.41249-0.70361 0.28805
   2  -4  1024054.91 1550.21   1-0.17264 0.33679 0.31572-0.81446 0.93301-0.47245
  -2   4 -1023161.64 2217.55   1 0.00685-0.17019-0.36808 0.86575-0.92976 0.47063
  -2  -4 -1025674.60 1779.71   1 0.62714-0.79137-0.77424 0.27554 0.08509-0.54570
   2   4  1021204.19 1423.84   1 0.16138 0.00243 0.86908-0.37076-0.46759 0.92872
  -2   4 -1024448.87 1739.06   1 0.70872-0.87200 0.07215 0.42659-0.70178 0.24005
   2   4  11 2235.23  743.83   1 0.77001-0.60203 0.56928-0.07025-0.28807 0.79537
  -2   4 -11 2504.84  515.61   1 0.02750-0.19525-0.39097 0.88864-0.91999 0.41494
  -2  -4 -11 3712.45  647.28   1 0.62016-0.78888-0.78355 0.28485 0.03785-0.54453
   2   4  11  968.98  220.08   1 0.06930 0.09895 0.91556-0.41725-0.39614 0.90338
  -2   4 -11 2931.39  508.27   1 0.71107-0.87874 0.06199 0.43676-0.70037 0.19247
   2   4  12 2658.72  603.82   1 0.76899-0.59661 0.59092-0.09189-0.24383 0.79725
  -2   4 -12 3633.01  809.57   1 0.04462-0.21679-0.40966 0.90734-0.91114 0.36018
  -2  -4 -12 3793.67  779.49   1 0.61246-0.78560-0.79046 0.29157-0.00694-0.54571
  -2   4 -12 3903.22  623.74   1 0.71251-0.88457 0.05559 0.44316-0.69944 0.14537
   2   4  1310971.73 1941.83   1 0.76623-0.58945 0.61046-0.11143-0.20055 0.80008
  -2   4 -1312926.01 1548.17   1 0.05853-0.23512-0.42467 0.92234-0.90345 0.30657
  -2  -4 -1316075.78 1433.33   1 0.60367-0.78129-0.79568 0.29679-0.04963-0.54908
  -2   4 -1312880.97 1183.66   1 0.71313-0.88958 0.05279 0.44596-0.69903 0.09878
   2   4  1430245.49 1949.25   1 0.76190-0.58072 0.62807-0.12905-0.15816 0.80380
  -2   4 -1431093.94 2350.43   1 0.06956-0.25057-0.43643 0.93411-0.89704 0.25425
  -2  -4 -1431808.51 1988.63   1 0.59415-0.77625-0.79924 0.30035-0.09050-0.55427
  -2   4 -1430481.94 1846.17   1 0.71299-0.89382 0.05345 0.44529-0.69913 0.05270
   2   4  15 8377.08 1198.48   1 0.75639-0.57083 0.64360-0.14449-0.11678 0.80825
  -2   4 -15 6871.73 1303.25   1 0.07798-0.26341-0.44535 0.94302-0.89195 0.20325
  -2  -4 -15 4723.06 1053.48   1 0.58396-0.77054-0.80133 0.30244-0.12977-0.56105
  -2   4 -15 8130.96 1011.69   1 0.71210-0.89733 0.05745 0.44130-0.69972 0.00712
   2   4  16 7632.29 1103.00   1 0.74931-0.55934 0.65783-0.15872-0.07603 0.81359
  -2   4 -16 5087.33 1224.11   1 0.08406-0.27390-0.45174 0.94941-0.88817 0.15356
  -2  -4 -16 7772.72 1251.04   1 0.57316-0.76422-0.80210 0.30321-0.16765-0.56922
  -2   4 -16 8405.90 1107.59   1 0.71046-0.90008 0.06469 0.43406-0.70075-0.03801
  -2   5  14 3280.36  947.58   1 0.72524-0.78310 0.68797-0.06408 0.02678 0.61858
   2   5 -14 1311.24  426.38   1-0.02914 0.08613-0.32663 0.94987-0.94470 0.30053
   2  -5 -14  649.88  469.65   1 0.63519-0.57845-0.75558 0.13221 0.16006-0.80492
  -2   5  14  866.13  303.02   1-0.04707-0.01109 0.95360-0.33037-0.29737 0.94378
   2   5 -14  606.89  503.15   1 0.73856-0.68079-0.10871 0.73222-0.66535 0.01904
  -2   5  13 6266.63 1481.16   1 0.73336-0.79562 0.67982-0.05593-0.00393 0.60320
   2   5 -13 5820.73 1506.36   1-0.04678 0.10822-0.30623 0.92947-0.95080 0.35265
   2  -5 -13 8605.55  930.56   1 0.63841-0.57720-0.74067 0.11730 0.20932-0.80812
  -2   5  13 4299.42 1329.20   1 0.00969-0.07225 0.93813-0.31491-0.34612 0.94636
   2   5 -13 6827.72  837.03   1 0.73869-0.67652-0.11005 0.73356-0.66499 0.06485
  -2  -5  1213245.80  997.14   1-0.20123 0.13539 0.29041-0.91384 0.93550-0.38283
  -2   5  1210596.38  945.19   1 0.74075-0.80741 0.67086-0.04698-0.03493 0.58810
   2   5 -12 7572.41 1727.24   1-0.06815 0.13404-0.28115 0.90439-0.95724 0.40509
  -2   5  12 7657.87 1784.94   1 0.06568-0.13199 0.91708-0.29419-0.39323 0.94658
  -2  -5  11 3430.95  896.90   1-0.22875 0.15844 0.26539-0.88881 0.93660-0.42999
  -2   5  11 2880.66  707.19   1 0.74740-0.81847 0.66105-0.03716-0.06626 0.57334
   2   5 -11 3179.14  730.30   1-0.09355 0.16389-0.25079 0.87403-0.96350 0.45737
   2  -5 -11 4110.96  849.09   1 0.63945-0.56939-0.70294 0.07962 0.31138-0.81820
  -2   5  11 4671.67  982.09   1 0.12082-0.19156 0.89140-0.26851-0.43679 0.94403
   2   5 -11 5360.52 1166.21   1 0.73813-0.66717-0.10428 0.72779-0.66654 0.15872
  -2  -5  10 6264.59  973.48   1-0.25964 0.18486 0.23651-0.85994 0.93629-0.47573
  -2   5  10 6152.01 1080.44   1 0.75330-0.82877 0.65033-0.02644-0.09798 0.55895
   2   5 -10 6835.29 1050.43   1-0.12326 0.19805-0.21456 0.83780-0.96890 0.50878
   2  -5 -10 4871.02  926.55   1 0.63702-0.56246-0.67939 0.05607 0.36417-0.82491
  -2   5  10 6165.96 1329.21   1 0.17460-0.24977 0.86116-0.23826-0.47740 0.93853
   2   5 -10 8855.51 1604.68   1 0.73738-0.66202-0.09686 0.72037-0.66849 0.20683
  -2  -5   916901.10 1233.97   1-0.29360 0.21435 0.20374-0.82717 0.93396-0.51946
  -2   5   917879.45 1445.83   1 0.75840-0.83828 0.63865-0.01476-0.13015 0.54503
   2   5  -917214.64 1291.25   1-0.15740 0.23664-0.17189 0.79513-0.97245 0.55835
   2  -5  -916395.67 1283.69   1 0.63222-0.55317-0.65242 0.02910 0.41789-0.83255
  -2   5   913577.13 1734.66   1 0.22676-0.30676 0.82699-0.20441-0.51444 0.92957
   2   5  -918669.96 1496.93   1 0.73622-0.65646-0.08617 0.70967-0.67122 0.25574
  -2   5   8 3145.75  625.32   1 0.76247-0.84683 0.62617-0.00239-0.16291 0.53185
   2   5  -8 1726.09  422.70   1 0.32909-0.24477-0.16737 0.79169-0.92934 0.55972
   2  -5  -8 4968.01  764.01   1 0.62476-0.54122-0.62178-0.00153 0.47228-0.84087
  -2  -5   8 2756.59  416.86   1 0.19611-0.27954 0.12290-0.74629 0.97284-0.60406
  -2   5   8 1795.86  303.41   1 0.27670-0.36109 0.78899-0.16642-0.54855 0.91755
   2   5  -8 2035.03  759.35   1 0.73454-0.65039-0.07198 0.69549-0.67472 0.30540
  -2   5   722408.49 1581.19   1 0.76587-0.85463 0.61230 0.01147-0.19628 0.51910
   2   5  -721325.66 1463.10   1 0.36776-0.27904-0.12721 0.75154-0.92117 0.59776
   2  -5  -720822.14 1464.91   1 0.61435-0.52674-0.58766-0.03548 0.52651-0.84928
  -2  -5   720280.75 1353.57   1 0.23882-0.32675 0.06637-0.68976 0.96879-0.64610
  -2   5   721348.24 1862.81   1 0.32417-0.41295 0.74795-0.12537-0.57920 0.90207
   2   5  -724122.23 1793.57   1 0.73220-0.64365-0.05408 0.67759-0.67892 0.35577
  -2   5   678533.14 4717.76   1 0.76832-0.86148 0.59716 0.02661-0.23038 0.50708
   2   5  -678953.18 4681.21   1 0.40777-0.31464-0.08388 0.70821-0.90921 0.63200
   2  -5  -693838.28 5582.00   1 0.60071-0.50854-0.54897-0.07417 0.58117-0.85783
  -2  -5   691138.33 5354.01   1 0.28488-0.37731 0.00314-0.62653 0.95855-0.68197
  -2   5   677268.01 4714.77   1 0.36886-0.46203 0.70449-0.08192-0.60631 0.88306
   2   5  -687125.28 5277.58   1 0.72901-0.63606-0.03221 0.65572-0.68373 0.40674
  -2   5   5 5403.84  792.27   1 0.76972-0.86728 0.58061 0.04316-0.26534 0.49593
   2   5  -5 5109.61  706.34   1 0.44828-0.35074-0.03796 0.66229-0.89308 0.66207
   2  -5  -5 8986.01 1200.30   1 0.58358-0.48686-0.50609-0.11705 0.63505-0.86559
  -2  -5   5 7791.22  957.98   1 0.33312-0.43005-0.06587-0.55751 0.94057-0.71009
  -2   5   5 6466.59  898.61   1 0.41087-0.50840 0.65934-0.03628-0.62964 0.86035
   2   5  -5 5335.13  833.21   1 0.72472-0.62737-0.00614 0.62965-0.68901 0.45818
  -2   5   4 8954.06  989.06   1 0.76995-0.87192 0.56246 0.06131-0.30131 0.48578
   2   5  -4 9185.16 1016.52   1 0.48837-0.38643 0.00980 0.61452-0.87257 0.68776
   2  -5  -4 6915.47  818.18   1 0.56265-0.46140-0.45917-0.16405 0.68743-0.87189
  -2  -5   4 7155.47  787.30   1 0.38199-0.48322-0.13888-0.48449 0.91366-0.72921
  -2   5   411602.38 1264.77   1 0.44927-0.55119 0.61317 0.00988-0.64974 0.83431
   2   5  -4 9951.80 1121.69   1 0.71911-0.61729 0.02421 0.59922-0.69447 0.50977
  -2   5   3  668.86  301.31   1 0.76886-0.87523 0.54248 0.08130-0.33846 0.47682
   2   5  -3 1742.98  623.14   1 0.52773-0.42125 0.05841 0.56588-0.84739 0.70874
   2  -5  -3  926.93  350.46   1 0.53811-0.43228-0.40825-0.21497 0.73739-0.87573
  -2  -5   3 1201.76  368.17   1 0.42962-0.53543-0.21426-0.40911 0.87721-0.73887
  -2   5   3  890.32  385.63   1 0.48432-0.59064 0.56670 0.05635-0.66653 0.80496
   2   5  -3 1984.81  671.61   1 0.71166-0.60545 0.05939 0.56405-0.70000 0.56148
  -2   5   217557.70 1982.81   1 0.76621-0.87697 0.52037 0.10357-0.37699 0.46924
   2   5  -220453.12 2301.03   1 0.56451-0.45368 0.10743 0.51686-0.81840 0.72596
   2  -5  -214521.76 1642.87   1 0.50991-0.39950-0.35391-0.26932 0.78404-0.87627
  -2  -5   215774.43 1736.73   1 0.47390-0.58431-0.28908-0.33414 0.83177-0.73954
  -2   5   219539.85 2209.48   1 0.51598-0.62669 0.52063 0.10242-0.68022 0.77250
   2   5  -218782.90 2108.55   1 0.70203-0.59143 0.09937 0.52406-0.70517 0.61283
  -2   5   111531.08 1318.65   1 0.76173-0.87688 0.49572 0.12823-0.41715 0.46327
   2   5  -113075.03 1561.28   1 0.59863-0.48344 0.15587 0.46843-0.78571 0.73949
  -2  -5   111214.53 1263.16   1 0.51377-0.62876-0.36113-0.26209 0.77821-0.73209
   2  -5  -112701.49 1458.59   1 0.47833-0.36334-0.29683-0.32640 0.82649-0.87260
  -2   5   114137.04 1642.00   1 0.54447-0.65958 0.47568 0.14757-0.69085 0.73700
   2   5  -112016.05 1399.38   1 0.68971-0.57473 0.14427 0.47917-0.70955 0.66338
  -2   5   040213.61 1334.72   1 0.75505-0.87459 0.46808 0.15587-0.45911 0.45911
   2   5   044676.67 1588.08   1 0.62966-0.51011 0.20302 0.42127-0.74987 0.74987
  -2  -5   046683.87 1541.83   1 0.54796-0.66751-0.42820-0.19503 0.71859-0.71859
   2  -5   047352.21 1619.44   1 0.44404-0.32450-0.23800-0.38537 0.86381-0.86381
  -2   5   046846.40 1723.75   1 0.56949-0.68899 0.43227 0.19098-0.69915 0.69915
   2   5   041327.50 1540.77   1 0.67418-0.55480 0.19405 0.42938-0.71261 0.71261
  -2   5  -118340.72 2012.33   1 0.74566-0.86958 0.43689 0.18705-0.50309 0.45697
   2   5   119279.90 2173.70   1 0.65719-0.53328 0.24814 0.37587-0.71170 0.75784
  -2  -5  -116903.63 1873.97   1 0.57617-0.70024-0.48882-0.13432 0.65504-0.70115
   2  -5   116597.89 1880.91   1 0.40730-0.28319-0.17840-0.44497 0.89569-0.84958
  -2   5  -117975.63 2026.55   1 0.59141-0.71529 0.39098 0.23227-0.70524 0.65909
   2   5   118240.13 2042.90   1 0.65482-0.53105 0.24857 0.37486-0.71373 0.75990
  -2   5  -222416.84 1117.51   1 0.73292-0.86123 0.40152 0.22243-0.54918 0.45693
   2   5   222956.52 1298.04   1 0.68142-0.55314 0.29122 0.33278-0.67145 0.76372
  -2  -5  -227651.77 1344.63   1 0.59823-0.72686-0.54244-0.08070 0.58980-0.68202
   2  -5   229781.47 1491.41   1 0.36913-0.24044-0.11923-0.50414 0.92169-0.82946
  -2   5  -223025.03 1258.80   1 0.61041-0.73868 0.35222 0.27103-0.70945 0.61716
   2   5   221588.35 2605.41   1 0.63059-0.50232 0.30741 0.31583-0.71262 0.80492
  -2   5  -3 8168.40  846.93   1 0.71598-0.84863 0.36113 0.26287-0.59744 0.45903
   2   5   3 6877.16  900.81   1 0.70227-0.56962 0.33186 0.29214-0.62981 0.76823
  -2  -5  -310638.12 1092.36   1 0.61478-0.74797-0.58899-0.03415 0.52452-0.66284
   2  -5   3 9504.99 1022.94   1 0.33034-0.19739-0.06182-0.56156 0.94183-0.80354
   2   5   3 6589.12  818.97   1 0.60176-0.46910 0.37024 0.25301-0.70767 0.84612
  -2   5  -3 8934.39 1059.78   1 0.62673-0.75938 0.31632 0.30693-0.71214 0.57369
   2   5   443389.28 2167.82   1 0.71988-0.58285 0.36995 0.25406-0.58728 0.77183
  -2   5  -438665.19 1773.01   1 0.69403-0.83106 0.31533 0.30868-0.64720 0.46265
  -2  -5  -440482.31 1906.31   1 0.62655-0.76400-0.62849 0.00517 0.46089-0.64519
   2  -5   442796.51 2022.52   1 0.29199-0.15454-0.00684-0.61654 0.95639-0.77200
   2   5   442040.16 2018.02   1 0.56733-0.43029 0.43616 0.18708-0.69848 0.88308
   2   5   530179.76 2006.89   1 0.73439-0.59292 0.40532 0.21863-0.54440 0.77501
  -2   5  -528978.41 1746.11   1 0.66621-0.80761 0.26375 0.36026-0.69756 0.46687
  -2  -5  -540058.90 2454.31   1 0.63419-0.77612-0.66226 0.03895 0.39899-0.62937
   2  -5   540067.61 2460.93   1 0.25481-0.11285 0.04470-0.66809 0.96595-0.73546
   2   5   529902.08 1870.71   1 0.52660-0.38514 0.50418 0.11887-0.68445 0.91516
  -2   5  -528129.36 1805.58   1 0.65270-0.79403 0.25415 0.36928-0.71370 0.48284
   2   5   615047.98 1788.00   1 0.74611-0.60025 0.43827 0.18568-0.50122 0.77795
  -2  -5  -615688.02 1749.59   1 0.63843-0.78486-0.69073 0.06741 0.33954-0.61599
   2  -5   617091.15 1940.26   1 0.21947-0.07301 0.09222-0.71561 0.97124-0.69466
   2   5   618883.97 2151.78   1 0.47973-0.33388 0.57304 0.05001-0.66443 0.94128
  -2   5  -615678.24 1840.44   1 0.66241-0.80813 0.22803 0.39540-0.71359 0.43655
   2   5   7 1267.67  645.39   1 0.75524-0.60499 0.46876 0.15518-0.45811 0.78095
  -2  -5  -7  934.98  464.03   1 0.63988-0.79080-0.71458 0.09126 0.28271-0.60522
   2  -5   7 1665.04  474.60   1 0.18650-0.03554 0.13536-0.75875 0.97308-0.65040
   2   5   7 2871.05  559.45   1 0.42636-0.27612 0.64126-0.01820-0.63795 0.96094
  -2   5  -7 1976.94  634.86   1 0.67038-0.82049 0.20532 0.41812-0.71303 0.38982
   2   5   8 1701.66  636.54   1 0.76199-0.60736 0.49693 0.12701-0.41523 0.78420
  -2   5  -8   81.64  311.97   1-0.15611 0.00120-0.17352 0.79677-0.97237 0.60428
  -2  -5  -8  241.53  355.78   1 0.63922-0.79450-0.73427 0.11090 0.22855-0.59704
   2   5   8  532.49  189.70   1 0.36612-0.21145 0.70730-0.08473-0.60470 0.97370
  -2   5  -8  732.03  357.35   1 0.67682-0.83132 0.18601 0.43742-0.71225 0.34286
   2   5   9 3170.90  782.85   1 0.76658-0.60756 0.52290 0.10105-0.37272 0.78781
  -2   5  -9 2624.22  454.56   1-0.12883-0.03052-0.20766 0.83090-0.96967 0.55557
  -2  -5  -9 1712.64  356.24   1 0.63647-0.79623-0.75073 0.12737 0.17687-0.59142
   2   5   9 2706.05  532.23   1 0.30016-0.14110 0.76933-0.14676-0.56392 0.97905
  -2   5  -9 3757.91  694.70   1 0.68191-0.84080 0.17008 0.45336-0.71138 0.29582
   2   5  10 4644.71  915.01   1 0.76920-0.60562 0.54669 0.07708-0.33083 0.79200
  -2   5 -10 5178.44 1074.14   1-0.10455-0.05925-0.23746 0.86071-0.96575 0.50563
  -2  -5 -10 7289.84 1308.05   1 0.63215-0.79639-0.76427 0.14090 0.12752-0.58813
   2   5  10 4627.96 1102.18   1 0.22860-0.06514 0.82568-0.20311-0.51573 0.97698
  -2   5 -10 5815.49 1056.32   1 0.68580-0.84908 0.15745 0.46599-0.71055 0.24882
   2   5  1112015.48 1231.35   1 0.77001-0.60203 0.56867 0.05510-0.28927 0.79656
  -2   5 -1110790.61 1509.69   1-0.08325-0.08500-0.26317 0.88641-0.96114 0.45501
  -2  -5 -1111816.10 1046.61   1 0.62650-0.79521-0.77527 0.15190 0.08031-0.58698
  -2   5 -1113078.00 1166.28   1 0.68861-0.85628 0.14804 0.47539-0.70985 0.20195
   2   5  1219622.20 1586.14   1 0.76917-0.59679 0.58885 0.03492-0.24822 0.80163
  -2   5 -1214293.58 2004.16   1-0.06484-0.10786-0.28505 0.90830-0.95631 0.40417
  -2  -5 -1222638.18 1507.29   1 0.61970-0.79290-0.78404 0.16068 0.03504-0.58778
  -2   5 -1215728.53 1092.05   1 0.69044-0.86249 0.14179 0.48164-0.70935 0.15527
  -2   5 -13  463.97  299.14   1-0.04919-0.12796-0.30342 0.92666-0.95158 0.35342
  -2  -5 -13 2163.83  721.76   1 0.61216-0.78978-0.79068 0.16707-0.00852-0.59019
  -2   5 -13 1072.13  430.67   1 0.69136-0.86780 0.13861 0.48483-0.70908 0.10883
   2   5  14 5512.69 1005.16   1 0.76301-0.58182 0.62425-0.00047-0.16766 0.81331
  -2   5 -14 3033.41  828.34   1-0.03614-0.14546-0.31856 0.94180-0.94721 0.30304
  -2  -5 -14 2840.93  751.53   1 0.60349-0.78559-0.79576 0.17215-0.05046-0.59430
  -2   5 -14 2706.59  707.97   1 0.69141-0.87225 0.13842 0.48502-0.70907 0.06264
  -2   6  11 2218.06  721.00   1 0.74657-0.81764 0.66238 0.08627-0.06214 0.56921
   2  -6 -11 3181.75  856.09   1 0.63938-0.56932-0.70184-0.04614 0.31400-0.82081
  -2   6  11 2495.54  630.08   1 0.15063-0.22137 0.87529-0.12781-0.45953 0.96677
  -2   6  10 3303.80  793.56   1 0.75223-0.82770 0.65245 0.09620-0.09187 0.55285
  -2   6  10 2828.96  734.37   1 0.19935-0.27452 0.84545-0.09797-0.49544 0.95657
   2   6 -10 3879.50  913.15   1 0.72002-0.64454 0.01959 0.72853-0.69367 0.23194
   2  -6  -918630.51 1650.43   1 0.63278-0.55372-0.65510-0.09288 0.41283-0.82750
  -2   6   914676.17 1855.75   1 0.24614-0.32614 0.81285-0.06576-0.52790 0.94303
   2   6  -917856.84 1615.89   1 0.71780-0.63793 0.03075 0.71737-0.69556 0.28000
  -2   6   8 8227.64 1711.04   1 0.76112-0.84548 0.63057 0.11796-0.15185 0.52079
   2   6  -8 7264.64 1056.44   1 0.46485-0.38053-0.01851 0.76770-0.88519 0.51557
   2  -6  -8 8685.41 1745.59   1 0.62629-0.54274-0.62749-0.12049 0.46261-0.83120
  -2  -6   8 6692.47  961.95   1 0.31293-0.39636-0.03661-0.71145 0.94906-0.58028
  -2   6   8 5977.33 1342.76   1 0.29042-0.37480 0.77765-0.03056-0.55759 0.92659
   2   6  -8 9212.38 1016.12   1 0.71484-0.63058 0.04494 0.70319-0.69784 0.32845
  -2   6   7 7616.08 1492.28   1 0.76454-0.85330 0.61832 0.13021-0.18206 0.50489
   2   6  -7 7372.17 1406.25   1 0.49325-0.40452 0.01578 0.73340-0.86974 0.54632
   2  -6  -7 9813.40  937.23   1 0.61743-0.52982-0.59728-0.15049 0.51188-0.83464
  -2  -6   7 7028.54 1315.60   1 0.34731-0.43482-0.08649-0.66156 0.93374-0.61095
  -2   6   7 5821.17 1504.12   1 0.33217-0.42095 0.74053 0.00655-0.58418 0.90705
   2   6  -7 5870.85 1329.87   1 0.71100-0.62236 0.06229 0.68584-0.70041 0.37720
  -2   6   6 1591.81  450.42   1 0.76716-0.86032 0.60523 0.14330-0.21247 0.48918
   2   6  -6 2341.24  520.52   1 0.52239-0.42898 0.05153 0.69763-0.85114 0.57383
   2  -6  -6 1512.36  373.12   1 0.60611-0.51394-0.56365-0.18412 0.56117-0.83782
  -2  -6   6 2003.40  398.64   1 0.38290-0.47498-0.14027-0.60777 0.91307-0.63639
   2   6  -6 2258.00  627.06   1 0.70614-0.61310 0.08293 0.66519-0.70319 0.42615
  -2   6   5 2193.08  602.45   1 0.76896-0.86652 0.59126 0.15727-0.24311 0.47370
   2   6  -5 1431.21  422.78   1 0.55073-0.45296 0.08872 0.66044-0.82995 0.59885
   2  -6  -5 1676.23  550.45   1 0.59218-0.49546-0.52701-0.22076 0.60956-0.84010
  -2  -6   5 1759.57  371.91   1 0.41874-0.51539-0.19665-0.55140 0.88655-0.65598
  -2   6   5 3097.22  711.04   1 0.40785-0.50538 0.66277 0.08489-0.62799 0.85870
   2   6  -5 -224.01  460.89   1 0.70005-0.60262 0.10699 0.64113-0.70602 0.47516
  -2   6   428533.17 2026.10   1 0.76989-0.87185 0.57634 0.17219-0.27401 0.45848
   2   6  -434178.88 2390.43   1 0.57830-0.47618 0.12664 0.62252-0.80592 0.62105
   2  -6  -435086.60 2488.46   1 0.57558-0.47430-0.48747-0.26030 0.65656-0.84099
  -2  -6   434209.06 2347.64   1 0.45387-0.55511-0.25447-0.49358 0.85395-0.66949
  -2   6   428772.28 2061.97   1 0.44131-0.54323 0.62312 0.12454-0.64572 0.83028
   2   6  -431533.64 2286.41   1 0.69251-0.59069 0.13457 0.61355-0.70874 0.52404
  -2   6   311428.27  946.88   1 0.76990-0.87627 0.56042 0.18810-0.30521 0.44357
   2   6  -312990.32 1049.72   1 0.60469-0.49821 0.16481 0.58434-0.77921 0.64056
   2  -6  -310543.56 1772.79   1 0.55617-0.45034-0.44531-0.30256 0.70168-0.84002
  -2  -6   3 8016.40 1200.79   1 0.48706-0.59289-0.31227-0.43560 0.81562-0.67729
  -2   6   314594.35 1269.21   1 0.47192-0.57824 0.58365 0.16401-0.66078 0.79920
   2   6  -313160.81 1104.19   1 0.68325-0.57705 0.16576 0.58236-0.71111 0.57259
   2   6  -2 1950.66  413.36   1 0.62951-0.51868 0.20280 0.54636-0.75004 0.65761
  -2  -6   2 1368.86  325.29   1 0.51798-0.62839-0.36908-0.37879 0.77166-0.67944
  -2   6   2 1546.59  431.63   1 0.49971-0.61042 0.54483 0.20283-0.67337 0.76566
   2   6  -2 1427.18  450.58   1 0.67198-0.56139 0.20060 0.54752-0.71287 0.62052
  -2   6   110096.91 1330.19   1 0.76691-0.88206 0.52530 0.22344-0.36864 0.41476
   2   6  -112620.16 1106.39   1 0.65241-0.53726 0.24006 0.50875-0.71883 0.67269
  -2  -6   1 8547.61 1120.34   1 0.54566-0.66065-0.42351-0.32437 0.72310-0.67699
   2  -6  -1 8289.87 1142.30   1 0.51002-0.39504-0.35412-0.39376 0.78388-0.82999
  -2   6   111502.42 1025.62   1 0.52475-0.63985 0.50709 0.24057-0.68373 0.72987
   2   6  -112626.57 1089.47   1 0.65837-0.54338 0.23908 0.50904-0.71370 0.66753
  -2   6   0 9972.88 1295.82   1 0.76375-0.88329 0.50584 0.24289-0.40098 0.40098
  -2  -6   0 9579.45 1234.25   1 0.56982-0.68934-0.47451-0.27326 0.67091-0.67091
   2  -6   010077.03 1330.76   1 0.48363-0.36407-0.30618-0.44170 0.81996-0.81996
  -2   6   012633.22 1073.50   1 0.54730-0.66680 0.47094 0.27696-0.69185 0.69185
   2   6   0 9589.19 1299.16   1 0.64164-0.52215 0.28098 0.46692-0.71367 0.71367
  -2   6  -1 7007.37  934.59   1 0.75934-0.88326 0.48500 0.26373-0.43377 0.38765
   2   6   1 6698.45 1018.30   1 0.69216-0.56825 0.31166 0.43715-0.65098 0.69711
  -2  -6  -1 9959.24 1306.63   1 0.58996-0.71403-0.52150-0.22627 0.61642-0.66253
   2  -6   1 9223.99 1274.34   1 0.45573-0.33162-0.25761-0.49044 0.85202-0.80590
  -2   6  -1 7715.70 1112.03   1 0.56716-0.69104 0.43648 0.31142-0.69843 0.65228
   2   6   1 8194.28 1167.26   1 0.62224-0.49835 0.32647 0.42143-0.71149 0.75764
   2   6   217650.05 1412.89   1 0.70878-0.58050 0.34545 0.40336-0.61505 0.70732
  -2  -6  -215156.94 1117.75   1 0.60625-0.73488-0.56406-0.18371 0.56061-0.65283
   2  -6   217054.80 1334.89   1 0.42634-0.29765-0.20893-0.53912 0.88010-0.78787
   2   6   217107.06 1346.37   1 0.59936-0.47109 0.37512 0.37278-0.70713 0.79943
  -2   6  -214483.89 1244.14   1 0.58464-0.71291 0.40409 0.34380-0.70349 0.61119
   2   6   322824.00 1712.04   1 0.72319-0.59049 0.37760 0.37113-0.57827 0.71664
  -2  -6  -322926.78 1625.86   1 0.61891-0.75210-0.60208-0.14569 0.50441-0.64273
   2  -6   324368.21 1769.85   1 0.39620-0.26295-0.16093-0.58711 0.90394-0.76560
   2   6   322781.73 1715.27   1 0.57263-0.43997 0.42656 0.32134-0.70009 0.83854
  -2   6  -320858.99 1613.41   1 0.59991-0.73256 0.37401 0.37389-0.70726 0.56881
   2   6   4 1314.53  660.08   1 0.73549-0.59841 0.40822 0.34052-0.54073 0.72522
  -2  -6  -4 1279.38  415.22   1 0.62830-0.76575-0.63538-0.11259 0.44890-0.63320
   2  -6   4 2365.09  539.68   1 0.36588-0.22804-0.11430-0.63374 0.92361-0.73915
   2   6   4 1894.70  441.41   1 0.54168-0.40464 0.48030 0.26760-0.68984 0.87444
  -2   6  -4 1572.78  459.01   1 0.61314-0.75018 0.34640 0.40150-0.70997 0.52537
   2   6   5 2578.97  572.19   1 0.74575-0.60428 0.43717 0.31157-0.50271 0.73332
  -2  -6  -5 1210.67  438.66   1 0.63465-0.77658-0.66474-0.08323 0.39411-0.62448
   2  -6   5 1671.60  512.14   1 0.33590-0.19349-0.06964-0.67840 0.93931-0.70874
   2   6   5 2903.13  662.09   1 0.50594-0.36449 0.53569 0.21197-0.67605 0.90675
   2   6   6  -34.91  437.08   1 0.75406-0.60820 0.46445 0.28428-0.46440 0.74112
  -2  -6  -6  743.02  311.95   1 0.63838-0.78481-0.69026-0.05772 0.34059-0.61703
   2  -6   6  756.56  325.92   1 0.30669-0.16023-0.02769-0.72037 0.95140-0.67481
   2   6   6 2274.67  579.11   1 0.46562-0.31977 0.59205 0.15561-0.65777 0.93462
  -2   6  -6  909.54  585.76   1 0.63415-0.77996 0.29907 0.44883-0.71302 0.43612
   2   6   7 2223.40  647.62   1 0.76051-0.61026 0.49009 0.25864-0.42593 0.74878
  -2  -6  -7 3797.66  775.05   1 0.63984-0.79076-0.71227-0.03570 0.28855-0.61107
   2  -6   7 4652.50  970.92   1 0.27881-0.12785 0.01162-0.75969 0.96027-0.63759
  -2   6  -7 5640.58 1139.48   1 0.64224-0.79244 0.27949 0.46840-0.71371 0.39067
   2   6   8 3333.49  808.64   1 0.76522-0.61058 0.51413 0.23461-0.38742 0.75639
  -2  -6  -8 4195.54  703.01   1 0.63952-0.79480-0.73095-0.01708 0.23813-0.60662
   2   6   8 2457.81  540.11   1 0.36950-0.21483 0.70384 0.04324-0.60669 0.97569
  -2   6  -8 2784.10  716.42   1 0.64893-0.80351 0.26269 0.48521-0.71405 0.34486
   2   6   912634.36 1425.61   1 0.76829-0.60911 0.53649 0.21204-0.34915 0.76421
  -2  -6  -9 8026.31  856.91   1 0.63731-0.79706-0.74698-0.00105 0.18933-0.60389
   2  -6   9 9682.46  979.33   1 0.22812-0.06816 0.08071-0.82878 0.97027-0.55540
   2   6   9 8333.70 1075.99   1 0.31394-0.15488 0.75722-0.01013-0.57275 0.98788
  -2   6  -912403.61 1175.25   1 0.65468-0.81357 0.24894 0.49918-0.71373 0.29817
   2   6  10 6201.02  813.98   1 0.76981-0.60622 0.55747 0.19106-0.31082 0.77199
  -2  -6 -10 5074.56 1079.02   1 0.63360-0.79784-0.76049 0.01244 0.14212-0.60273
   2  -6  10 5484.73  631.97   1 0.20577-0.04130 0.11028-0.85835 0.97236-0.51138
  -2   6 -10 6451.35  844.95   1 0.65889-0.82216 0.23769 0.51044-0.71369 0.25196
   2   6  11  681.99  689.46   1 0.76987-0.60188 0.57702 0.17151-0.27264 0.77994
  -2  -6 -11  578.05  363.71   1 0.62859-0.79731-0.77173 0.02368 0.09642-0.60310
   2  -6  11   53.35  353.64   1 0.18558-0.01661 0.13654-0.88461 0.97309-0.46601
  -2   6 -11  722.14  414.67   1 0.66200-0.82967 0.22916 0.51896-0.71360 0.20570
  -2   7   614756.23 1747.81   1 0.76365-0.85681 0.62188 0.25140-0.17346 0.45017
  -2   7   612584.55 2066.31   1 0.35958-0.45275 0.71393 0.15767-0.60083 0.87758
   2   7  -615381.20 1927.79   1 0.67646-0.58342 0.18714 0.68568-0.71230 0.43526
   2  -7  -5  829.53  508.67   1 0.60338-0.50666-0.55615-0.31625 0.57149-0.80204
  -2   7   5 1285.91  561.94   1 0.39252-0.49005 0.67983 0.19244-0.61947 0.85018
   2   7  -5  469.95  417.41   1 0.66910-0.57167 0.20905 0.66376-0.71315 0.48229
   2  -7  -4 2661.76  712.23   1 0.59055-0.48926-0.52295-0.34945 0.61462-0.79906
  -2   7   4 1132.48  448.49   1 0.42271-0.52463 0.64559 0.22669-0.63602 0.82058
   2   7  -4 1451.82  612.45   1 0.66030-0.55848 0.23385 0.63897-0.71366 0.52897
   2   7  -3  539.96  303.20   1 0.66549-0.55909 0.26249 0.61112-0.69871 0.56030
   2  -7  -3 1447.07  567.92   1 0.57572-0.46988-0.48779-0.38461 0.65620-0.79453
  -2   7   3 1807.89  641.04   1 0.45043-0.55674 0.61170 0.26057-0.65032 0.78875
   2   7  -3 1948.82  731.59   1 0.64947-0.54313 0.26128 0.61127-0.71407 0.57562
   2   7  -2 4350.57  977.82   1 0.68150-0.57072 0.29138 0.58223-0.67129 0.57902
   2  -7  -2 2344.19  620.12   1 0.55883-0.44842-0.45097-0.42155 0.69593-0.78816
  -2   7   2 3902.60  940.20   1 0.47572-0.58643 0.57852 0.29375-0.66256 0.75485
   2   7  -2 3577.21  909.63   1 0.63716-0.52644 0.29187 0.58068-0.71331 0.62101
   2   7  -1 3764.11  831.81   1 0.69634-0.58119 0.31990 0.55371-0.64246 0.59632
   2  -7  -1 2092.15  621.78   1 0.54029-0.42530-0.41261-0.45991 0.73337-0.77948
  -2   7   1 2122.07  602.30   1 0.49866-0.61376 0.54635 0.32592-0.67292 0.71906
   2   7  -1 3403.34  852.78   1 0.62276-0.50765 0.32529 0.54725-0.71157 0.66542
   2   7   018653.22 2160.45   1 0.70990-0.59037 0.34785 0.52576-0.61239 0.61239
   2  -7   022596.94 2509.09   1 0.52013-0.40057-0.37318-0.49934 0.76823-0.76823
  -2   7   017774.48 2160.55   1 0.51935-0.63884 0.51547 0.35681-0.68158 0.68158
   2   7   018042.52 2068.68   1 0.60601-0.48651 0.36146 0.51109-0.70858 0.70858
   2   7   1 1123.90  511.49   1 0.72210-0.59820 0.37509 0.49852-0.58125 0.62739
   2  -7   1  666.41  427.08   1 0.49861-0.37447-0.33308-0.53944 0.80027-0.75416
  -2   7  -1 1784.70  648.88   1 0.53804-0.66192 0.48626 0.38629-0.68851 0.64236
   2   7   1  776.35  567.13   1 0.58665-0.46276 0.40023 0.47232-0.70402 0.75017
   2   7   211112.19 1456.01   1 0.73288-0.60457 0.40141 0.47212-0.54931 0.64155
   2  -7   2 9391.62 1128.01   1 0.47600-0.34729-0.29275-0.57977 0.82928-0.73705
  -2   7  -2 7996.80 1050.69   1 0.55453-0.68280 0.45865 0.41389-0.69434 0.60204
   2   7   2 7327.12 1014.45   1 0.56440-0.43613 0.44140 0.43114-0.69757 0.78987
   2   7   3 4995.94 1161.01   1 0.74226-0.60956 0.42686 0.44666-0.51655 0.65491
   2  -7   3 4024.76  928.05   1 0.45289-0.31963-0.25282-0.61990 0.85496-0.71662
   2   7   3 3247.80  802.38   1 0.53900-0.40634 0.48470 0.38785-0.68886 0.82731
  -2   7  -3 6130.34  870.48   1 0.56912-0.70177 0.43295 0.43960-0.69903 0.56058
   2   7   4  693.28  397.95   1 0.75023-0.61314 0.45131 0.42222-0.48318 0.66766
   2  -7   4  421.40  309.18   1 0.42913-0.29129-0.21347-0.65925 0.87765-0.69319
   2   7   4  427.79  462.98   1 0.50997-0.37290 0.52970 0.34257-0.67774 0.86231
  -2   7  -4  688.56  422.36   1 0.58191-0.71895 0.40928 0.46327-0.70275 0.51815
   2   7   516998.37 2030.28   1 0.75680-0.61533 0.47471 0.39882-0.44932 0.67992
   2  -7   520401.67 2329.51   1 0.40532-0.26291-0.17526-0.69746 0.89721-0.66664
   2   7   516884.83 1987.37   1 0.47747-0.33601 0.57614 0.29613-0.66338 0.89409
  -2   7  -517649.98 2238.90   1 0.59304-0.73447 0.38776 0.48479-0.70564 0.47489
  -3   0  19  515.62  387.81   1 0.49486-0.58925 0.71330-0.71330 0.49628 0.37944
   3   0 -19  534.01  454.64   1 0.48907-0.39479-0.78045 0.78045-0.38948-0.48479
   3   0 -19 2089.39  653.58   1 0.64249-0.54848-0.66886 0.66886-0.37392-0.50177
  -3   0  1832836.02 2077.56   1 0.50606-0.60491 0.71591-0.71591 0.48100 0.34862
   3   0 -1832834.32 2074.27   1 0.50226-0.40352-0.78614 0.78614-0.36014-0.46812
   3   0 -1835526.83 2139.94   1 0.62509-0.52656-0.69955 0.69955-0.34623-0.48306
  -3   0  1739915.85 3162.66   1 0.51629-0.61961 0.71809-0.71809 0.46666 0.31687
   3   0 -1748546.36 3844.84   1 0.51510-0.41191-0.79106 0.79106-0.32998-0.45226
   3   0 -1743453.60 3440.35   1 0.60692-0.50392-0.72811 0.72811-0.31857-0.46466
  -3   0  16 3408.47  671.39   1 0.52550-0.63329 0.71989-0.71989 0.45341 0.28403
   3   0 -16 4818.68  925.88   1 0.52761-0.41996-0.79518 0.79518-0.29884-0.43739
   3   0 -16 2766.43  539.98   1 0.58788-0.48040-0.75490 0.75490-0.29070-0.44645
  -3   0  15 3621.74  709.18   1 0.53364-0.64590 0.72135-0.72135 0.44144 0.24991
   3   0 -15 3098.24  626.25   1 0.53982-0.42772-0.79846 0.79846-0.26653-0.42368
   3   0 -15 2833.71  565.73   1 0.56796-0.45602-0.78003 0.78003-0.26260-0.42847
  -3   0  1412964.78 1389.13   1 0.54060-0.65733 0.72248-0.72248 0.43099 0.21428
   3   0 -1413355.63 1516.00   1 0.55214-0.43581-0.80045 0.80045-0.23326-0.41150
   3   0 -1413173.69 1410.28   1 0.54718-0.43077-0.80356 0.80356-0.23425-0.41076
  -3   0  1326006.18 1095.27   1 0.54626-0.66746 0.72333-0.72333 0.42234 0.17683
   3   0 -1325019.80 1148.23   1 0.56388-0.44308-0.80182 0.80182-0.19776-0.40094
   3   0 -1324523.73 1159.50   1 0.52552-0.40463-0.82556 0.82556-0.20560-0.39333
  -3   0  1290041.78 3237.59   1 0.55043-0.67610 0.72391-0.72391 0.41588 0.13720
   3   0 -1289764.75 3236.59   1 0.57540-0.45011-0.80204 0.80204-0.16009-0.39257
   3   0 -1288330.66 3236.75   1 0.50300-0.37766-0.84603 0.84603-0.17664-0.37628
  -3   0  11135377.5 3487.73   1 0.55285-0.68299 0.72423-0.72423 0.41211 0.09488
   3   0 -11131645.7 3448.98   1 0.58669-0.45692-0.80092 0.80092-0.11964-0.38696
   3   0 -11137483.6 3596.96   1 0.47946-0.34963-0.86512 0.86512-0.14724-0.35960
  -3   0  10 2278.96  370.05   1 0.55314-0.68775 0.72427-0.72427 0.41165 0.04925
   3   0 -10 3222.52  580.29   1 0.59775-0.46350-0.79810 0.79810-0.07560-0.38495
   3   0 -10 2157.15  383.13   1 0.45488-0.32058-0.88278 0.88278-0.11737-0.34340
  -3   0   982480.22 3957.70   1 0.55076-0.68984 0.72395-0.72395 0.41537-0.00056
   3   0  -983466.59 4029.95   1 0.60852-0.46979-0.79308 0.79308-0.02679-0.38770
   3   0  -984601.91 6341.26   1 0.42919-0.29040-0.89901 0.89901-0.08694-0.32776
  -3   0   864701.46 1789.78   1 0.54490-0.68845 0.72313-0.72313 0.42443-0.05570
   3   0  -863319.26 1737.70   1 0.61861-0.47528-0.78517 0.78517 0.02849-0.39698
   3   0  -859571.74 2678.37   1 0.40224-0.25898-0.91382 0.91382-0.05582-0.31280
  -3   0   710979.79 1073.85   1 0.53434-0.68235 0.72147-0.72147 0.44040-0.11777
   3   0  -710170.78  982.90   1 0.62814-0.48033-0.77253 0.77253 0.09286-0.41529
   3   0  -710453.53 1100.17   1 0.37386-0.22612-0.92717 0.92717-0.02385-0.29868
  -3   0   6528414.2 4262.57   1 0.61609-0.76801-0.59306 0.59306 0.51836-0.24170
   3   0  -519820.90 1758.00   1 0.63549-0.47850 0.72553-0.72553 0.26408-0.49459
   3   0  -522976.08 1067.03   1 0.63985-0.48309-0.72067 0.72067 0.26687-0.49724
  -3   0   520091.76 1782.20   1 0.60190-0.75838-0.55215 0.55215 0.57691-0.34637
  -3   0   463956.21 1643.89   1 0.44839-0.60981 0.70030-0.70030 0.55544-0.37107
   3   0  -459174.48 2551.40   1 0.58879-0.42737 0.72728-0.72728 0.35267-0.53703
   3   0  -464675.38 1648.44   1 0.63477-0.47352-0.66545 0.66545 0.39270-0.57700
  -3   0   462493.00 5337.48   1 0.57308-0.73412-0.48180 0.48180 0.66290-0.47846
   3   0  -320275.27 1788.50   1 0.52233-0.35644 0.71929-0.71929 0.45801-0.59628
   3   0  -322413.61  996.69   1 0.60686-0.44127-0.56577 0.56577 0.55821-0.69654
  -3   0   322838.56 1009.01   1 0.51188-0.67749-0.35758 0.35758 0.78109-0.64275
   3   0  -318575.52 1672.36   1-0.08156 0.24773 0.96029-0.96029-0.26678 0.12827
  -3   0   268236.51 1712.40   1 0.28124-0.45160 0.63063-0.63063 0.72332-0.63115
   3   0  -266150.28 1659.44   1 0.42530-0.25494 0.69263-0.69263 0.58255-0.67472
   3   0  -270153.92 1750.01   1 0.52346-0.35328-0.37956 0.37956 0.76283-0.85505
  -3   0   268357.23 1698.64   1 0.38433-0.55448-0.14248 0.14248 0.91213-0.81990
   3   0  -261139.97 2650.56   1-0.04954 0.22011 0.95414-0.95414-0.29520 0.20285
   3   0  -1174187.8 1450.60   1 0.28364-0.10881 0.63184-0.63184 0.72133-0.76742
   3   0  -1171578.8 1488.78   1 0.00357 0.17136 0.94006-0.94006-0.34096 0.29479
  -3   0  -1281267.4 2273.35   1 0.11935-0.30252-0.48819 0.48819-0.86453 0.81862
  -3   0  -1278980.1 2281.35   1-0.01619-0.16751 0.94587-0.94587-0.32413 0.27796
   3   0   1267791.7 2148.68   1 0.22682-0.04313 0.82695-0.82695-0.51449 0.56061
  -3   0  -216844.62 1486.12   1 0.33879-0.52694-0.15745 0.15745-0.92759 0.83518
  -3   0  -218628.64 1717.70   1 0.25046-0.43829-0.61281 0.61281-0.74948 0.65753
  -3   0  -219768.56 1746.65   1 0.08290-0.27100 0.90964-0.90964-0.40704 0.31481
   3   0   219362.66 1695.74   1 0.43095-0.24292 0.63577-0.63577-0.64036 0.73264
   3   0   3 8243.14  771.70   1 0.65755-0.46513 0.24876-0.24876-0.71115 0.84956
  -3   0  -3 7678.16  702.73   1 0.48380-0.67635 0.00422-0.00422-0.87516 0.73656
  -3   0  -3 7980.56  747.95   1 0.32759-0.51987-0.67666 0.67666-0.65940 0.52139
  -3   0  -3 8206.82  725.60   1 0.22091-0.41338 0.83111-0.83111-0.51033 0.37195
   3   0   3 6503.89  580.00   1 0.66027-0.46803 0.23393-0.23393-0.71366 0.85218
   3   0   428647.37 1281.95   1 0.72418-0.52733 0.37996-0.37996-0.57547 0.75996
  -3   0  -428456.81 1251.61   1 0.57499-0.77173 0.12198-0.12198-0.80901 0.62413
  -3   0  -427162.93 1163.11   1 0.39982-0.59663 0.67179-0.67179-0.62356 0.43899
   3   0   425388.98 1094.06   1 0.73944-0.54268-0.32058 0.32058-0.59198 0.77634
   3   0   5159466.5 1509.61   1 0.75557-0.55433 0.47003-0.47003-0.45625 0.68686
  -3   0  -5156813.1 1436.85   1 0.62914-0.83024 0.20222-0.20222-0.75051 0.51942
  -3   0  -5159175.0 1285.95   1 0.56875-0.76992 0.43362-0.43362-0.69892 0.46817
  -3   0  -6275294.8 2369.10   1 0.66115-0.86668 0.25493-0.25493-0.70561 0.42878
  -3   0  -6271972.4 2160.92   1 0.67195-0.87736 0.20070-0.20070-0.71287 0.43583
   3   0   6265785.6 2156.03   1 0.46905-0.26306-0.87287 0.87287-0.13449 0.41096
   3   0   7116960.1 2978.46   1 0.76984-0.55968 0.57766-0.57766-0.27136 0.59418
  -3   0  -7126887.0 3266.56   1 0.42760-0.63770-0.74735 0.74735-0.50853 0.18653
  -3   0  -7114806.3 2825.90   1 0.71776-0.92756 0.03093-0.03093-0.69559 0.37238
   3   0   7109077.0 2707.49   1 0.35265-0.14205-0.93575 0.93575-0.00017 0.32277
   3   0   837520.30 1857.99   1 0.76607-0.55151 0.61127-0.61127-0.19866 0.56760
  -3   0  -837530.38 1784.20   1 0.73531-0.94949-0.07833 0.07833-0.67317 0.30385
   3   0   9 2108.17  399.92   1 0.75888-0.53992 0.63706-0.63706-0.13506 0.55012
  -3   0  -9 1921.84  221.92   1 0.74145-0.96002-0.14442 0.14442-0.65528 0.23979
   3   0  1014073.84 1189.85   1 0.74980-0.52650 0.65696-0.65696-0.07863 0.53961
  -3   0 -1012590.57  969.61   1-0.13137-0.09180 0.96631-0.96631-0.22129-0.24042
  -3   0 -1014299.11 1096.09   1 0.74337-0.96634-0.18174 0.18174-0.64370 0.18205
   3   0  11 6898.64  734.60   1 0.73897-0.51127 0.67318-0.67318-0.02717 0.53425
  -3   0 -11 8260.59  936.49   1 0.43285-0.66076-0.75055 0.75055-0.49929-0.00671
  -3   0 -11 5393.62  712.86   1-0.07800-0.14955 0.95970-0.95970-0.26997-0.23791
  -3   0 -11 6645.11  586.57   1 0.74389-0.97126-0.19934 0.19934-0.63787 0.13005
   3   0  12122527.7 4314.19   1 0.72704-0.49493 0.68629-0.68629 0.02022 0.53295
  -3   0 -12135246.8 4829.93   1 0.42927-0.66164-0.74838 0.74838-0.50561-0.04639
  -3   0 -12104239.7 3630.18   1-0.02825-0.20369 0.94908-0.94908-0.31375-0.24031
  -3   0 -12123104.9 4219.59   1 0.74396-0.97572-0.20275 0.20275-0.63671 0.08273
   3   0  13 8892.36  985.21   1 0.71422-0.47771 0.69694-0.69694 0.06443 0.53484
  -3   0 -13 7664.08  925.95   1 0.42446-0.66128-0.74541 0.74541-0.51398-0.08401
  -3   0 -13 7027.32  716.86   1 0.74380-0.97995-0.19532 0.19532-0.63922 0.03907
   3   0  14 2259.63  428.76   1 0.70062-0.45971 0.70559-0.70559 0.10610 0.53926
  -3   0 -14 4068.60  705.92   1 0.41860-0.65987-0.74173 0.74173-0.52402-0.11998
  -3   0 -14 3054.39  396.10   1 0.74327-0.98383-0.17907 0.17907-0.64456-0.00174
   3   0  1520836.52 1637.78   1 0.68667-0.44039 0.71234-0.71234 0.14507 0.54646
  -3   0 -1522394.64 1772.95   1 0.41182-0.65754-0.73738 0.73738-0.53541-0.15459
   3   0  16  552.05  316.25   1 0.67169-0.42095 0.71784-0.71784 0.18310 0.55453
  -3   0 -16 1100.42  453.73   1 0.40420-0.65438-0.73239 0.73239-0.54791-0.18809
   3   0  17 6282.83 1275.39   1 0.65603-0.40082 0.72201-0.72201 0.21979 0.56394
  -3   0 -17 6355.79 1353.05   1 0.39582-0.65046-0.72677 0.72677-0.56134-0.22066
   3   0  1843224.73 3461.59   1 0.63967-0.38000 0.72497-0.72497 0.25538 0.57446
  -3   0 -1849649.25 4039.12   1 0.38673-0.64582-0.72053 0.72053-0.57555-0.25246
   3   0  19 6372.41  960.28   1 0.62259-0.35845 0.72680-0.72680 0.29005 0.58588
  -3   0 -19 6133.04 1048.35   1 0.37696-0.64050-0.71366 0.71366-0.59040-0.28360
  -3  -1  19 5666.78  764.27   1 0.41456-0.50899 0.68884-0.81362 0.59466 0.28096
  -3   1  19 6696.93  697.10   1 0.55519-0.64958 0.72452-0.59972 0.40843 0.46729
   3   1 -19 6382.56  627.63   1 0.42592-0.33162-0.74632 0.87096-0.51145-0.36255
   3  -1 -19 7858.31  933.84   1 0.53490-0.44062-0.79723 0.67264-0.27980-0.59447
   3   1 -19 4379.31  955.16   1 0.68962-0.59562-0.56118 0.68593-0.45769-0.41800
   3  -1 -19 6527.79  631.04   1 0.58061-0.48655-0.76439 0.63968-0.28033-0.59503
  -3  -1  18 3144.10  658.29   1 0.42348-0.52237 0.69200-0.81678 0.58462 0.24491
  -3   1  18 4280.49  897.43   1 0.56757-0.66643 0.72587-0.60107 0.38853 0.44110
   3   1 -18 4072.26  856.88   1 0.43777-0.33902-0.75350 0.87814-0.49048-0.33752
   3  -1 -18 2126.93  589.65   1 0.54831-0.44990-0.79979 0.67507-0.24430-0.58468
   3   1 -18 2265.64  534.95   1 0.67934-0.58086-0.58881 0.71356-0.43793-0.39168
   3  -1 -18 3260.32  703.05   1 0.55468-0.45615-0.79536 0.67065-0.24437-0.58493
  -3  -1  17 2458.58  797.88   1 0.43103-0.53438 0.69459-0.81938 0.57597 0.20748
  -3   1  17  947.98  422.66   1 0.57922-0.68254 0.72679-0.60200 0.36914 0.41440
   3   1 -17 1644.04  690.75   1 0.44922-0.34603-0.76001 0.88461-0.46964-0.31260
   3  -1 -17 1109.52  632.34   1 0.56099-0.45811-0.80158 0.67685-0.20675-0.57618
   3   1 -17  321.70  480.28   1 0.66867-0.56572-0.61462 0.73937-0.41845-0.36507
   3  -1 -17  486.69  427.52   1 0.52720-0.42420-0.82393 0.69923-0.20779-0.57543
  -3  -1  16 2845.75  622.15   1 0.43708-0.54490 0.69662-0.82140 0.56892 0.16844
  -3   1  16 1253.47  539.28   1 0.59012-0.69791 0.72733-0.60253 0.35033 0.38711
   3   1 -16 1321.25  454.01   1 0.46010-0.35245-0.76603 0.89062-0.44889-0.28734
   3  -1 -16 1435.22  663.95   1 0.57320-0.46583-0.80210 0.67738-0.16754-0.56934
   3   1 -16 1946.16  672.07   1 0.65772-0.55030-0.63869 0.76344-0.39933-0.33810
   3  -1 -16  707.54  423.74   1 0.49826-0.39084-0.85005 0.72541-0.17066-0.56658
  -3  -1  1556589.08 3691.76   1 0.44148-0.55376 0.69806-0.82284 0.56373 0.12754
  -3   1  1556206.35 3699.62   1 0.60017-0.71252 0.72755-0.60273 0.33233 0.35920
   3   1 -1555208.90 3617.74   1 0.47049-0.35838-0.77148 0.89607-0.42830-0.26191
   3  -1 -1557184.83 3821.30   1 0.58488-0.47304-0.80120 0.67648-0.12638-0.56444
   3   1 -1555906.05 3720.48   1 0.64658-0.53468-0.66109 0.78585-0.38062-0.31072
   3  -1 -1558496.37 3845.69   1 0.46747-0.35556-0.87400 0.74936-0.13257-0.55859
  -3  -1  1415007.61 1849.07   1 0.44400-0.56075 0.69887-0.82365 0.56073 0.08446
  -3   1  1417112.51 1251.18   1 0.60958-0.72639 0.72744-0.60262 0.31499 0.33044
   3   1 -1418085.72 1342.85   1 0.48040-0.36384-0.77640 0.90099-0.40793-0.23627
   3  -1 -1414925.97 1932.96   1 0.59600-0.47967-0.79868 0.67396-0.08292-0.56185
   3   1 -1418652.89 1328.16   1 0.63527-0.51885-0.68204 0.80675-0.36227-0.28273
   3  -1 -1416329.26 1253.42   1 0.43485-0.31846-0.89562 0.77098-0.09358-0.55151
  -3  -1  13 6638.09  846.35   1 0.44436-0.56558 0.69899-0.82377 0.56030 0.03880
  -3   1  13 8006.67 1092.08   1 0.61820-0.73948 0.72708-0.60226 0.29859 0.30073
   3   1 -13 6839.34  948.67   1 0.48982-0.36880-0.78079 0.90539-0.38784-0.21034
   3  -1 -13 5164.12  742.94   1 0.60646-0.48565-0.79426 0.66954-0.03671-0.56200
   3   1 -13 5586.91  846.53   1 0.62409-0.50321-0.70120 0.82591-0.34468-0.25425
   3  -1 -13 5102.53  720.51   1 0.40024-0.27938-0.91484 0.79019-0.05354-0.54546
  -3  -1  1210182.20 1044.03   1 0.44216-0.56785 0.69828-0.82306 0.56292-0.00989
  -3   1  12 6927.88  892.94   1 0.62599-0.75173 0.72653-0.60171 0.28333 0.26989
   3   1 -12 6932.12  787.68   1 0.49874-0.37326-0.78468 0.90928-0.36812-0.18405
   3  -1 -1210490.53 1098.31   1 0.61587-0.49046-0.78774 0.66306 0.01276-0.56549
   3   1 -12 4888.08  663.85   1 0.61309-0.48773-0.71878 0.84348-0.32783-0.22503
   3  -1 -12 7257.72  909.90   1 0.36347-0.23812-0.93152 0.80687-0.01234-0.54059
  -3  -1  1130820.18 1267.42   1 0.43688-0.56703 0.69655-0.82133 0.56915-0.06221
  -3   1  1122539.58 1929.05   1 0.63287-0.76307 0.72584-0.60102 0.26946 0.23765
   3   1 -1125984.05 2386.98   1 0.50713-0.37720-0.78808 0.91268-0.34890-0.15726
   3  -1 -1134076.30 1394.62   1 0.62453-0.49464-0.77818 0.65350 0.06625-0.57293
   3   1 -1122389.63 2000.16   1 0.60240-0.47257-0.73475 0.85945-0.31185-0.19494
   3  -1 -1130541.42 1328.55   1 0.32460-0.19488-0.94536 0.82070 0.03013-0.53708
  -3  -1  10 5422.01  531.94   1 0.42778-0.56240 0.69349-0.81827 0.57971-0.11885
  -3   1  10 6525.69  661.81   1 0.63874-0.77341 0.72510-0.60028 0.25733 0.20369
   3   1 -10 8453.90  843.23   1 0.51495-0.38055-0.79100 0.91560-0.33035-0.12979
   3  -1 -10 7580.47  817.59   1 0.63184-0.49747-0.76500 0.64033 0.12460-0.58522
   3   1 -10 9230.38  977.11   1 0.59220-0.45791-0.74907 0.87378-0.29694-0.16377
   3  -1 -10 6551.26  715.07   1 0.28271-0.14849-0.95633 0.83167 0.07417-0.53504
  -3  -1   9202098.4 4998.92   1 0.41388-0.55297 0.68859-0.81337 0.59542-0.18065
  -3   1   9203101.2 5074.03   1 0.64344-0.78257 0.72440-0.59958 0.24739 0.16752
   3   1  -9209081.9 5215.91   1 0.52211-0.38327-0.79346 0.91805-0.31274-0.10138
   3  -1  -9200455.0 5010.60   1 0.63728-0.49843-0.74712 0.62245 0.18886-0.60341
   3   1  -9206685.5 5217.58   1 0.58273-0.44396-0.76166 0.88637-0.28335-0.13130
   3   1  -8165021.3 1734.91   1 0.52851-0.38521-0.79545 0.92004-0.29651-0.07159
   3   1  -8166383.2 2037.88   1 0.57426-0.43102-0.77238 0.89709-0.27138-0.09719
  -3  -1   776059.50 1994.70   1 0.36570-0.51372 0.66978-0.79456 0.64625-0.32366
   3   1  -767932.66 1829.08   1 0.53393-0.38617-0.79697 0.92157-0.28238-0.03971
  -3  -1   773738.98 1909.62   1 0.63921-0.78702-0.73436 0.60969 0.22826 0.09416
   3  -1  -777994.20 2099.13   1 0.63840-0.49062-0.69044 0.56578 0.34018-0.66270
  -3   1   769224.57 1852.18   1-0.13704-0.01159 0.96672-0.84207-0.21602 0.53923
   3   1  -771264.01 2058.13   1 0.56713-0.41942-0.78102 0.90573-0.26144-0.06105
  -3  -1   6 9897.34  922.30   1 0.32700-0.47949 0.65275-0.77753 0.68335-0.40684
  -3   1   6 9879.53  928.59   1 0.64739-0.79992 0.72374-0.59892 0.23890 0.03771
   3   1  -6 9904.16  939.88   1 0.53794-0.38572-0.79800 0.92260-0.27165-0.00443
  -3  -1   6 9437.06  869.76   1 0.63925-0.79154-0.73398 0.60930 0.22940 0.04696
   3  -1  -6 8741.64  870.47   1 0.63075-0.47848-0.64571 0.52105 0.43034-0.70678
  -3   1   611582.89 1570.83   1-0.08057-0.07244 0.96013-0.83548-0.26767 0.54470
  -3  -1   542249.75 1853.38   1 0.27439-0.43135 0.62714-0.75192 0.72896-0.49853
   3   1  -537052.97 1649.99   1 0.53965-0.38298-0.79842 0.92301-0.26699 0.03692
  -3  -1   542424.87 1848.81   1 0.63965-0.79642-0.72928 0.60461 0.24286-0.01256
   3  -1  -542831.99 1898.97   1 0.61346-0.45698-0.58496 0.46033 0.53054-0.76108
  -3   1   535746.51 1592.53   1-0.01924-0.13816 0.94670-0.82206-0.32151 0.55237
  -3  -1   430129.49 1355.61   1 0.20397-0.36540 0.58882-0.71356 0.78209-0.59774
  -3   1   431063.34 1386.50   1 0.63339-0.79484 0.72578-0.60096 0.26840-0.08399
   3   1  -428932.23 1284.24   1 0.53677-0.37563-0.79771 0.92231-0.27480 0.09075
  -3  -1   430964.90 1344.28   1 0.63988-0.80113-0.71529 0.59063 0.28087-0.09657
   3  -1  -432528.88 1451.92   1 0.58132-0.42028-0.50075 0.37612 0.64132-0.82576
  -3   1   430296.46 1478.18   1 0.04713-0.20865 0.92454-0.79996-0.37815 0.56260
   3   1  -430358.20 1467.07   1 0.55923-0.39811-0.79022 0.91493-0.25058 0.06629
  -3  -1   3277267.2 2318.20   1 0.11173-0.27762 0.53224-0.65698 0.83918-0.70092
  -3   1   3295387.7 2466.01   1 0.61446-0.78038 0.72727-0.60245 0.30577-0.16746
   3  -1  -3267154.3 2283.00   1 0.72556-0.55951 0.68767-0.81245 0.02560-0.16390
   3   1  -3276721.5 2243.73   1 0.52107-0.35548-0.79311 0.91771-0.31535 0.17730
   3  -1  -3278359.0 2357.13   1 0.52751-0.36190-0.38737 0.26273 0.75608-0.89442
  -3  -1   2999998.585119.53   1-0.00376-0.16657 0.45225-0.57696 0.89188-0.79960
   3  -1  -2899271.3 7058.26   1 0.71008-0.53963 0.69982-0.82460 0.07758-0.16978
   3   1  -2936608.0 7197.57   1 0.42727-0.25722-0.74701 0.87161-0.50931 0.41728
   3  -1  -2942528.4 7389.25   1 0.44605-0.27590-0.24135 0.11667 0.86185-0.95407
  -3   1   2947643.180661.32   1 0.32116-0.49133-0.04848 0.17315 0.94578-0.85358
   3  -1  -2877069.5 7022.27   1 0.35586-0.18535 0.71764-0.84216-0.59861 0.50636
   3   1  -2948422.780746.76   1 0.57456-0.40450-0.77201 0.89671-0.27180 0.17965
   3   1  -183479.08 2085.56   1 0.02980 0.14500 0.47667-0.35196 0.87857-0.92471
  -3   1   180255.39 1987.74   1 0.50086-0.67568 0.71472-0.58992 0.48816-0.44207
   3  -1  -194233.21 2336.32   1 0.68575-0.51091 0.71272-0.83754 0.14750-0.19360
   3  -1  -195842.21 2397.79   1 0.33601-0.16128-0.06980-0.05486 0.93926-0.98538
  -3   1   182590.16 2068.55   1 0.20149-0.37616 0.11589 0.00878 0.97260-0.92651
   3  -1  -1104639.6 2615.81   1 0.42647-0.25162 0.64113-0.76574-0.63801 0.59187
   3   1  -179810.38 2088.97   1 0.59328-0.41874-0.74760 0.87231-0.29850 0.25242
  -3  -1   190222.28 2312.29   1 0.45842-0.63304-0.88036 0.75572-0.12163 0.16770
   3   1   091090.86 2284.49   1-0.11877 0.29806 0.36198-0.23727 0.92458-0.92458
  -3   1   087202.55 2140.91   1 0.31847-0.49776 0.64878-0.52400 0.69112-0.69112
   3  -1   084511.57 2083.12   1 0.63793-0.45862 0.72522-0.85004 0.25901-0.25901
   3  -1   076662.80 1916.64   1-0.06529 0.24424-0.28452 0.15987-0.95644 0.95644
  -3  -1   080640.89 1974.88   1 0.35111-0.53003-0.69475 0.57011-0.62772 0.62772
   3   1   084363.31 2069.25   1 0.63954-0.46032-0.72825 0.85291 0.24623-0.24623
   3  -1   081681.78 2054.43   1 0.20783-0.02866 0.10759-0.23226 0.97222-0.97222
  -3   1   082386.35 2104.78   1 0.36154-0.54084 0.71195-0.58744-0.60199 0.60199
   3  -1   078055.35 1962.51   1 0.50566-0.32642 0.53612-0.66073-0.67592 0.67592
  -3  -1   081146.18 2061.37   1 0.47268-0.65178-0.87021 0.74556-0.13893 0.13893
  -3   1  -1272302.8 2121.06   1-0.13872-0.04504 0.34527-0.22055 0.92819-0.97433
   3   1   1269851.8 2275.73   1 0.41750-0.23375-0.07306 0.19792-0.90573 0.95193
   3   1   1262533.5 2135.73   1 0.63106-0.44741-0.76680 0.89147 0.11735-0.07129
   3   1   1276005.8 2305.32   1 0.66598-0.48254-0.62073 0.74548-0.41369 0.45978
   3  -1   231523.86 1346.26   1 0.07267 0.11553 0.50622-0.63096 0.85933-0.76715
   3  -1   233260.37 1420.56   1 0.68056-0.49252 0.28963-0.41443-0.67301 0.76528
   3   1   231007.20 1403.37   1 0.53146-0.34343 0.06326 0.06160-0.84471 0.93715
  -3  -1  -230695.91 1364.25   1 0.37369-0.56184-0.12091-0.00394-0.91963 0.82723
   3  -1   230204.79 1374.81   1 0.18692 0.00090-0.55449 0.42991-0.81092 0.90286
  -3  -1  -231522.68 1380.45   1 0.52186-0.70973-0.79337 0.66878-0.31338 0.22135
   3   1   228639.13 1263.62   1 0.62752-0.43940-0.77360 0.89828 0.08800 0.00411
  -3   1  -233015.12 1445.63   1 0.51871-0.70674 0.51644-0.39183-0.68133 0.58904
   3  -1   229581.37 1293.79   1 0.66162-0.47378 0.23020-0.35488-0.71362 0.80596
   3   1   229594.23 1290.90   1 0.71881-0.53100-0.45826 0.58297-0.52277 0.61495
  -3  -1  -228841.04 1256.64   1 0.48841-0.67648-0.85812 0.73347-0.15834 0.06618
   3  -1   3316412.1 2500.67   1 0.76986-0.57730 0.55894-0.68369-0.30805 0.44640
  -3   1  -3335855.6 2628.33   1 0.41832-0.61087-0.07214 0.19700-0.90542 0.76682
  -3  -1  -3328939.5 2776.50   1 0.53355-0.72588-0.79687 0.67228-0.28338 0.14534
   3   1   3306593.5 2614.88   1 0.62703-0.43443-0.77441 0.89909 0.08429 0.05388
  -3   1  -3343411.5 2824.83   1 0.58316-0.77556 0.40691-0.28226-0.70309 0.56464
   3  -1   3317261.5 2600.70   1 0.71563-0.52339 0.04123-0.16591-0.69726 0.83578
   3   1   3321139.9 2533.34   1 0.73910-0.54691-0.11452 0.23922-0.66378 0.80228
  -3  -1  -3312182.8 2483.94   1 0.47955-0.67210-0.86504 0.74040-0.14737 0.00913
   3  -1   4237917.3 1955.50   1 0.75999-0.56303 0.63397-0.75873-0.14312 0.32759
  -3  -1  -4242291.7 2193.26   1 0.53719-0.73398-0.79782 0.67322-0.27368 0.08962
   3   1   4227447.3 2067.01   1 0.62791-0.43083-0.77293 0.89760 0.09106 0.09317
   3   1   4236021.3 1835.59   1 0.46292-0.26611 0.59560-0.47099-0.65647 0.84104
  -3   1  -4236885.7 2007.23   1 0.63402-0.83081 0.29937-0.17472-0.71301 0.52841
  -3  -1  -4224051.1 1760.08   1 0.41731-0.61433-0.90581 0.78117-0.07312-0.11118
   3  -1   542911.51 1866.94   1 0.74477-0.54348 0.66518-0.78996-0.05338 0.28386
   3   1   545980.61 2091.05   1 0.71908-0.51792 0.36812-0.24332-0.58940 0.82009
  -3   1  -545598.29 1969.04   1 0.68022-0.88138 0.28900-0.16419-0.67362 0.44294
  -3  -1  -541312.98 1864.51   1 0.53691-0.73816-0.79775 0.67316-0.27441 0.04434
   3   1   539547.32 1773.06   1 0.62942-0.42786-0.77018 0.89485 0.10317 0.12713
  -3   1  -543310.27 1890.17   1 0.67179-0.87280 0.20118-0.07649-0.71289 0.48202
   3  -1   540562.66 1779.29   1 0.73851-0.53728-0.33121 0.20650-0.58727 0.81773
   3  -1   661984.43 5305.54   1 0.73030-0.52462 0.68307-0.80785 0.00798 0.26860
  -3   1  -667552.92 1722.30   1 0.70957-0.91510 0.34714-0.22234-0.61318 0.33636
  -3  -1  -662190.33 5362.61   1 0.53437-0.74007-0.79709 0.67250-0.28121 0.00512
  -3   1  -668346.06 1755.52   1 0.69736-0.90277 0.11707 0.00760-0.70708 0.43004
   3  -1   659326.28 2571.00   1 0.71229-0.50648-0.48603 0.36128-0.50637 0.78291
   3  -1   755118.01 2409.84   1 0.71681-0.50673 0.69501-0.81979 0.05591 0.26676
   3   1   756993.77 2544.19   1 0.76003-0.55002 0.48799-0.36320-0.42918 0.75203
  -3   1  -754486.16 2365.34   1 0.72332-0.93323 0.37794-0.25314-0.57789 0.25493
  -3   1  -755852.66 2817.19   1 0.29559-0.50564-0.65147 0.77605-0.69871 0.37691
  -3  -1  -754459.36 2448.26   1 0.53033-0.74049-0.79597 0.67138-0.29183-0.03026
  -3   1  -756325.60 2443.72   1 0.71402-0.92382 0.04872 0.07596-0.69842 0.37520
   3  -1   753453.97 2336.74   1 0.66920-0.45891-0.61341 0.48866-0.41939 0.74202
   3  -1   830982.73 1543.93   1 0.70385-0.48936 0.70374-0.82852 0.09661 0.27217
   3   1   826402.70 2380.29   1 0.76771-0.55314 0.53133-0.40657-0.35818 0.72713
  -3   1  -825749.69 2236.27   1 0.72985-0.94425 0.39374-0.26895-0.55881 0.18984
  -3   1  -827889.23 2463.10   1 0.31426-0.52881-0.66606 0.79070-0.67646 0.30845
  -3  -1  -834256.11 1767.49   1 0.52519-0.73981-0.79444 0.66984-0.30501-0.06310
  -3   1  -827524.18 2384.89   1 0.72440-0.93857-0.00431 0.12902-0.68936 0.32004
  -3  -1  -829261.16 2161.76   1 0.71338-0.92756 0.05142-0.17612-0.69887 0.32955
   3  -1   829509.88 2231.58   1 0.61627-0.40150-0.71382 0.58911-0.33265 0.70123
   3  -1   9315225.8 7671.69   1 0.69147-0.47198 0.71020-0.83502 0.13215 0.28276
   3   1   9306754.7 7539.61   1 0.77001-0.55105 0.56697-0.44221-0.29260 0.70766
  -3  -1  -9326342.0 8052.66   1 0.51920-0.73827-0.79249 0.66789-0.31998-0.09414
  -3  -1  -9278471.8 6676.59   1 0.61588-0.83460 0.34047-0.46512-0.71046 0.29511
  -3   1  -9298852.9 7250.55   1 0.73068-0.94925-0.04333 0.16803-0.68133 0.26585
  -3  -1  -9279812.5 6712.68   1 0.72390-0.94312-0.43427 0.30951-0.53607 0.12126
   3  -1   9289419.3 7029.63   1 0.55816-0.33892-0.79145 0.66674-0.24910 0.66376
   3  -1  1066401.10 1793.23   1 0.67865-0.45469 0.71549-0.84031 0.16584 0.29517
   3   1  1065551.87 1885.47   1 0.76840-0.54504 0.59644-0.47168-0.23196 0.69314
  -3   1 -1064454.05 1815.61   1 0.33541-0.55887-0.68276 0.80740-0.64909 0.18909
  -3  -1 -1071058.64 2057.89   1 0.51249-0.73602-0.79011 0.66552-0.33625-0.12389
  -3  -1 -1066518.53 1627.12   1 0.55180-0.77490 0.46334-0.58799-0.69341 0.23191
  -3   1 -1066622.47 1747.29   1 0.73433-0.95729-0.07023 0.19493-0.67514 0.21349
  -3  -1 -1064371.81 1581.89   1 0.72277-0.94637-0.43955 0.31484-0.53328 0.07236
   3  -1  1066048.38 1729.87   1 0.49801-0.27411-0.85027 0.72562-0.17035 0.63113
   3  -1  11 8699.66  831.82   1 0.66561-0.43719 0.71963-0.84445 0.19768 0.30944
   3   1  1111655.05 1141.68   1 0.76387-0.53610 0.62101-0.49626-0.17557 0.68286
  -3   1 -1112087.18 1160.36   1 0.34053-0.56845-0.68672 0.81136-0.64222 0.13621
  -3  -1 -11 7973.21  877.08   1 0.50515-0.73314-0.78731 0.66271-0.35349-0.15266
  -3  -1 -11 7571.16  623.03   1 0.51307-0.74063 0.52504-0.64965-0.67902 0.17146
  -3   1 -1113049.25 1114.44   1 0.73629-0.96365-0.08675 0.21145-0.67108 0.16326
  -3  -1 -11 7723.22  647.45   1 0.72630-0.95438-0.42106 0.29635-0.54330 0.03630
   3  -1  1213787.14 1541.46   1 0.65226-0.41938 0.72281-0.84763 0.22822 0.32500
   3   1  1211509.71 1365.20   1 0.75736-0.52525 0.64129-0.51651-0.12308 0.67625
  -3   1 -1213943.03 1617.79   1 0.34301-0.57538-0.68861 0.81326-0.63886 0.08685
  -3  -1 -1217409.91 2029.89   1 0.49725-0.72969-0.78405 0.65946-0.37147-0.18069
  -3   1 -1215104.09 1666.86   1 0.73712-0.96888-0.09438 0.21909-0.66913 0.11515
  -3  -1 -1213558.90 1465.45   1 0.73124-0.96379-0.39127 0.26657-0.55873 0.00563
   3  -1  13 7015.59  774.74   1 0.63851-0.40116 0.72514-0.84996 0.25781 0.34151
   3   1  1310665.94 1298.99   1 0.74880-0.51229 0.65871-0.53393-0.07338 0.67265
  -3   1 -13 9804.20 1156.96   1 0.34333-0.58015-0.68886 0.81350-0.63842 0.04042
  -3  -1 -1310184.42 1116.67   1 0.48881-0.72571-0.78034 0.65574-0.39003-0.20815
  -3   1 -1310920.09 1103.62   1 0.73711-0.97327-0.09432 0.21902-0.66914 0.06900
   3  -1  1444749.38 2916.47   1 0.62428-0.38246 0.72667-0.85149 0.28672 0.35870
   3   1  1440552.33 2717.56   1 0.73876-0.49785 0.67344-0.54866-0.02627 0.67164
  -3   1 -1440931.23 2723.21   1 0.34185-0.58312-0.68773 0.81237-0.64043-0.00357
  -3  -1 -1446302.00 3086.70   1 0.47987-0.72123-0.77614 0.65155-0.40904-0.23516
  -3   1 -1443200.77 2774.41   1 0.73636-0.97692-0.08745 0.21216-0.67090 0.02459
   3  -1  1541524.92 2993.16   1 0.60952-0.36324 0.72744-0.85227 0.31512 0.37641
   3   1  1538349.03 2853.81   1 0.72747-0.48215 0.68588-0.56110 0.01864 0.67282
  -3   1 -1540002.97 2991.62   1 0.33884-0.58457-0.68542 0.81006-0.64449-0.04550
  -3  -1 -1540727.73 3002.35   1 0.47044-0.71625-0.77145 0.64686-0.42841-0.26180
   3  -1  1611051.23 1828.04   1 0.59417-0.34342 0.72747-0.85229 0.34312 0.39451
   3   1  1611728.42 2255.84   1 0.71505-0.46533 0.69633-0.57155 0.06170 0.67585
  -3   1 -1612247.99 1206.27   1 0.33451-0.58469-0.68207 0.80671-0.65029-0.08571
  -3  -1 -1611922.90 1239.81   1 0.46052-0.71079-0.76625 0.64166-0.44807-0.28816
   3  -1  17  352.15  276.52   1 0.57834-0.32307 0.72674-0.85154 0.37062 0.41292
   3   1  17  576.48  410.92   1 0.70162-0.44750 0.70503-0.58025 0.10318 0.68047
  -3   1 -17  -72.30  434.10   1 0.32900-0.58364-0.67777 0.80241-0.65755-0.12445
  -3  -1 -17  486.95  433.58   1 0.45012-0.70485-0.76052 0.63593-0.46796-0.31428
   3  -1  18 1060.31  437.48   1 0.56166-0.30192 0.72527-0.85007 0.39811 0.43151
  -3   1 -18 1103.09  450.63   1 0.32244-0.58153-0.67259 0.79724-0.66606-0.16194
  -3  -1 -18  764.43  478.84   1 0.43926-0.69834-0.75438 0.62973-0.48780-0.34020
  -3  -2  19 2110.15  602.34   1 0.31267-0.40709 0.64605-0.89561 0.69631 0.17931
  -3   2  19 3885.52  935.86   1 0.59825-0.69273 0.72754-0.47789 0.33582 0.54012
   3   2 -19 3342.52  924.18   1 0.34425-0.24995-0.68956 0.93884-0.63717-0.23683
   3  -2 -19 3652.28 1048.47   1 0.56675-0.47283-0.80199 0.55254-0.18866-0.68638
  -3  -2  1818503.58 1656.82   1 0.31827-0.41716 0.64869-0.89825 0.69129 0.13824
  -3   2  1819000.20 1767.05   1 0.61097-0.70992 0.72740-0.47776 0.31239 0.51744
   3   2 -1818071.17 1649.66   1 0.35311-0.25436-0.69626 0.94554-0.62492-0.20308
   3  -2 -1817546.68 2147.15   1 0.57892-0.48052-0.80185 0.55241-0.14786-0.68112
   3   2 -1819155.91 1731.54   1 0.71576-0.61744-0.47156 0.72097-0.51507-0.31456
   3  -2 -1817262.53 1541.98   1 0.47394-0.37547-0.86927 0.61999-0.14047-0.68893
  -3  -2  1744534.16 3112.76   1 0.32197-0.42532 0.65042-0.89998 0.68795 0.09550
   3   2 -1741065.77 2912.94   1 0.36103-0.25782-0.70213 0.95142-0.61372-0.16828
   3  -2 -1742147.41 3061.67   1 0.59039-0.48751-0.80019 0.55074-0.10544-0.67749
   3   2 -1739014.27 2845.06   1 0.71042-0.60747-0.49327 0.74277-0.50198-0.28154
   3  -2 -1744509.69 3185.31   1 0.43695-0.33400-0.89434 0.64505-0.09605-0.68727
  -3   2  16 4856.14  934.70   1 0.63449-0.74236 0.72566-0.47601 0.26615 0.47148
   3   2 -16 4820.55  890.89   1 0.36790-0.26024-0.70716 0.95644-0.60379-0.13221
   3  -2 -16 2974.72  730.10   1 0.60110-0.49373-0.79682 0.54738-0.06116-0.67571
   3   2 -16 5006.62  878.23   1 0.70497-0.59754-0.51308 0.76258-0.48965-0.24778
   3  -2 -16 1969.10  511.64   1 0.39790-0.29048-0.91601 0.66672-0.05088-0.68636
  -3  -2  15 7461.21  972.22   1 0.32281-0.43509 0.65081-0.90037 0.68719 0.00409
  -3   2  15 3993.38  746.48   1 0.64531-0.75766 0.72410-0.47445 0.24338 0.44814
   3   2 -15 4859.33  688.66   1 0.37360-0.26148-0.71127 0.96055-0.59540-0.09460
   3  -2 -15 7752.49 1183.18   1 0.61094-0.49909-0.79153 0.54209-0.01478-0.67604
   3   2 -15 5534.78  948.95   1 0.69963-0.58773-0.53094 0.78044-0.47812-0.21321
   3  -2 -15 8103.92 1067.11   1 0.35709-0.24534-0.93405 0.68473-0.00503-0.68625
  -3  -2  1413786.10 1594.95   1 0.31935-0.43610 0.64920-0.89876 0.69032-0.04512
  -3   2  1412740.15 1596.88   1 0.65554-0.77235 0.72212-0.47248 0.22089 0.42453
   3   2 -1411843.82 1369.10   1 0.37795-0.26138-0.71437 0.96366-0.58890-0.05509
   3  -2 -1415038.41 1818.73   1 0.61953-0.50307-0.78423 0.53488 0.03396-0.67882
   3   2 -1414616.73 1763.41   1 0.69453-0.57816-0.54682 0.79632-0.46754-0.17771
   3  -2 -1413027.75 1565.05   1 0.31361-0.19737-0.94862 0.69930 0.04182-0.68703
  -3  -2  1318326.12 1873.13   1 0.31278-0.43400 0.64610-0.89566 0.69621-0.09710
  -3   2  1312115.53 1310.62   1 0.66517-0.78645 0.71975-0.47011 0.19872 0.40061
   3   2 -1313803.57 1462.16   1 0.38070-0.25968-0.71631 0.96560-0.58476-0.01324
   3  -2 -1320166.75 2132.72   1 0.62719-0.50626-0.77415 0.52480 0.08550-0.68430
   3   2 -1314944.05 1643.75   1 0.68981-0.56897-0.56065 0.81015-0.45806-0.14110
  -3  -2  1271249.39 2339.75   1 0.30256-0.42824 0.64119-0.89075 0.70521-0.15218
   3   2 -1263063.82 2091.69   1 0.38149-0.25601-0.71687 0.96615-0.58357 0.03156
   3  -2 -1271911.57 2456.79   1 0.63342-0.50800-0.76100 0.51165 0.14017-0.69291
   3   2 -1270537.14 2410.97   1 0.68561-0.56030-0.57232 0.82182-0.44985-0.10322
  -3  -2  1165267.60 2379.62   1 0.28800-0.41816 0.63403-0.88359 0.71767-0.21073
   3   2 -1167820.06 2467.15   1 0.37979-0.24986-0.71567 0.96495-0.58614 0.08013
   3  -2 -1167966.32 2543.07   1 0.63784-0.50795-0.74416 0.49482 0.19839-0.70507
   3   2 -1180114.07 3074.83   1 0.68210-0.55232-0.58167 0.83117-0.44314-0.06384
  -3  -2  1020865.35 1883.34   1 0.26828-0.40290 0.62399-0.87355 0.73393-0.27307
  -3   2  1015681.69 1399.03   1 0.69055-0.82521 0.71063-0.46099 0.13467 0.32634
   3   2 -1012672.39 1112.17   1 0.37482-0.24043-0.71214 0.96142-0.59359 0.13359
   3  -2 -1023612.72 2062.60   1 0.63978-0.50548-0.72309 0.47377 0.26038-0.72112
  -3   2  1013332.44 1175.62   1-0.11484-0.02063 0.96480-0.71551-0.23656 0.69829
   3   2 -1014924.11 1486.81   1 0.67947-0.54521-0.58848 0.83798-0.43817-0.02271
  -3  -2   923374.71 1809.41   1 0.24245-0.38155 0.61031-0.85979 0.75414-0.33935
  -3   2   928347.41 2235.67   1 0.69782-0.83695 0.70706-0.45742 0.11446 0.30045
   3   2  -928466.40 2192.09   1 0.36535-0.22652-0.70531 0.95459-0.60749 0.19348
   3  -2  -926563.73 2091.72   1 0.63896-0.50017-0.69627 0.44694 0.32699-0.74166
  -3   2   926356.79 2022.74   1-0.05864-0.08122 0.95607-0.70678-0.28719 0.70274
   3   2  -929000.61 2430.55   1 0.67791-0.53918-0.59243 0.84193-0.43526 0.02045
  -3  -2   877997.91 3772.08   1 0.20908-0.35264 0.59175-0.84123 0.77853-0.40983
  -3   2   877729.92 3770.33   1 0.70411-0.84814 0.70358-0.45403 0.09583 0.27294
   3   2  -878411.59 3742.74   1 0.34944-0.20615-0.69349 0.94278-0.63003 0.26203
   3  -2  -880228.26 3871.51   1 0.63425-0.49097-0.66262 0.41329 0.39830-0.76689
  -3   2   874754.58 3620.41   1 0.00018-0.14443 0.94111-0.69182-0.33809 0.70747
   3   2  -878663.36 3870.27   1 0.67763-0.53443-0.59312 0.84262-0.43475 0.06603
  -3  -2   737432.40 1845.35   1 0.16687-0.31490 0.56690-0.81638 0.80670-0.48408
  -3   2   732528.77 1655.71   1 0.71013-0.85857 0.69979-0.45023 0.07744 0.24523
   3   2  -730489.31 1494.32   1 0.32377-0.17603-0.67365 0.92293-0.66434 0.34234
  -3  -2   732980.08 1618.71   1 0.60422-0.75191-0.79541 0.54597-0.04711 0.36950
   3  -2  -738226.32 1916.43   1 0.62442-0.47665-0.62055 0.37122 0.47434-0.79686
  -3   2   730529.01 1747.76   1 0.06122-0.20943 0.91893-0.66977-0.38962 0.71241
  -3  -2   6321270.4 2783.65   1 0.11441-0.26691 0.53398-0.78346 0.83771-0.56119
  -3   2   6327296.6 2950.75   1 0.71544-0.86828 0.69604-0.44649 0.06043 0.21615
   3   2  -6322532.5 2763.84   1 0.28177-0.12951-0.63990 0.88905-0.71493 0.43910
   3  -2  -6302828.0 2719.06   1 0.60793-0.45601-0.56878 0.31952 0.55397-0.83063
  -3   2   6325028.4 2858.49   1 0.12454-0.27719 0.88948-0.64032-0.43966 0.71634
  -3   2   517734.98 1628.86   1 0.71996-0.87720 0.69253-0.44297 0.04533 0.18515
   3   2  -518706.38 1657.83   1 0.21406-0.05735-0.57992 0.82907-0.78604 0.55618
  -3  -2   517815.88 1584.97   1 0.57022-0.72687-0.80209 0.55265-0.17743 0.40771
   3  -2  -519452.98 1768.28   1 0.58274-0.42626-0.50409 0.25483 0.63741-0.86796
  -3   2   516264.93 1549.47   1 0.18936-0.34644 0.85193-0.60277-0.48821 0.71877
   3   2  -516841.75 1601.96   1 0.68693-0.53031-0.56872 0.81822-0.45240 0.22195
  -3   2   452766.99 2317.56   1 0.72350-0.88515 0.68952-0.43997 0.03298 0.15140
   3  -2  -458249.95 2538.38   1 0.76684-0.60508 0.52477-0.77435-0.36954 0.18505
   3   2  -448911.27 2140.23   1 0.09995 0.06114-0.46829 0.71713-0.87789 0.69424
  -3  -2   464144.29 1624.50   1 0.53490-0.69603-0.79723 0.54804-0.27981 0.46387
   3  -2  -468560.05 1811.81   1 0.54661-0.38558-0.42545 0.17615 0.72124-0.90570
  -3   2   450799.33 2228.64   1 0.25477-0.41649 0.80631-0.55728-0.53380 0.71830
   3   2  -449958.64 2261.62   1 0.69410-0.53301-0.54811 0.79761-0.46667 0.28231
  -3  -2   358966.92 2554.97   1-0.11140-0.05445 0.36808-0.61751 0.92309-0.78467
  -3   2   356745.78 2471.10   1 0.72577-0.89182 0.68748-0.43792 0.02486 0.11342
   3  -2  -347396.93 2069.07   1 0.76441-0.59827 0.50946-0.75904-0.39510 0.25674
   3   2  -352390.50 2238.60   1-0.08950 0.25510-0.25567 0.50497-0.96260 0.82457
  -3  -2   352649.57 2252.30   1 0.46663-0.63222-0.76949 0.52030-0.43603 0.57408
   3  -2  -354307.19 2379.96   1 0.49793-0.33232-0.33185 0.08256 0.80120-0.93954
  -3   2   352113.41 2276.24   1 0.31977-0.48589 0.75197-0.50294-0.57643 0.71481
   3   2  -356829.78 2577.32   1 0.70345-0.53789-0.51830 0.76780-0.48632 0.34805
  -3  -2   2138103.411777.20   1-0.20577 0.03551 0.28632-0.53569 0.93577-0.84366
  -3   2   2145786.6 1355.58   1 0.72608-0.89654 0.68719-0.43763 0.02373 0.06846
   3  -2  -2132167.0 3292.24   1 0.75832-0.58779 0.48075-0.73033-0.44024 0.34800
  -3  -2   2136714.2 3344.73   1 0.31002-0.48003-0.66264 0.41335-0.68175 0.77375
  -3  -2   2141727.4 1156.15   1 0.35535-0.52550-0.09846-0.15089 0.92953-0.83730
  -3   2   2145513.9 1446.78   1 0.38292-0.55343 0.68978-0.44075-0.61446 0.70671
   3   2  -2144374.5 1554.01   1 0.71458-0.54467-0.47648 0.72590-0.51218 0.41999
  -3  -2   134179.16 1510.73   1-0.30301 0.12828 0.19446-0.44383 0.93293-0.88687
   3   2  -126052.55 1153.04   1-0.06565 0.24046 0.40495-0.15552 0.91197-0.95811
  -3   2   126912.11 1188.40   1 0.72277-0.89763 0.69016-0.44060 0.03556 0.01053
   3  -2  -127294.11 1195.48   1 0.74172-0.56680 0.42532-0.67490-0.51859 0.47246
  -3  -2   125328.61 1091.32   1 0.00288-0.17722-0.36363 0.11479-0.93153 0.97745
  -3  -2   130888.05 1326.15   1 0.56099-0.73576-0.45560 0.20630 0.69116-0.64505
   3  -2  -130267.92 1363.10   1 0.36168-0.18695-0.10797-0.14138 0.92602-0.97214
  -3  -2   127868.38 1287.38   1 0.62814-0.80268-0.69442 0.44501-0.35100 0.39707
  -3   2   0283981.7 2290.95   1 0.71051-0.88977 0.69954-0.44998 0.07626-0.07626
   3  -2   0265136.4 2136.01   1 0.68913-0.50984 0.30581-0.55541-0.65694 0.65694
  -3  -2   0271109.0 2174.11   1 0.62985-0.80907-0.64181 0.39249 0.43743-0.43743
   3   2   0270826.0 2150.48   1 0.31179-0.13262-0.03499 0.28434 0.94950-0.94950
   3   2   0280751.4 2475.55   1 0.73765-0.55879-0.34014 0.58956-0.58324 0.58324
  -3   2  -1303173.2 2372.72   1 0.65924-0.84302 0.72127-0.47163 0.21249-0.25859
   3  -2   1308303.9 2405.09   1 0.46498-0.28123-0.01836-0.23136-0.88512 0.93133
   3   2   1310770.5 2675.89   1 0.48305-0.29930 0.00330 0.24642-0.87558 0.92178
  -3  -2  -1305948.9 2490.82   1 0.63988-0.82359-0.71846 0.46914 0.27267-0.31874
  -3   2  -280765.97 2074.70   1-0.11171-0.07613-0.22874 0.47804-0.96705 0.87503
  -3  -2  -260396.43 2599.75   1 0.63570-0.82382-0.75377 0.50442 0.16646-0.25858
   3   2   281838.78 2047.80   1 0.56618-0.37779-0.46646 0.71572 0.67959-0.58737
  -3   2  -285230.75 2206.13   1 0.58889-0.77691 0.39589-0.14659-0.70460 0.61230
   3   2   282703.46 2108.61   1 0.73717-0.54938-0.09490 0.34430-0.66899 0.76132
   3   2   347275.19 2124.51   1 0.61824-0.42586 0.18528 0.06443-0.76383 0.90248
  -3   2  -354070.59 2419.28   1-0.03768-0.15462-0.31679 0.56609-0.94774 0.80970
  -3  -2  -345658.20 1997.16   1 0.62793-0.82053-0.77290 0.52356 0.09117-0.22936
   3   2   346148.88 2001.35   1 0.60093-0.40799-0.54956 0.79882 0.58038-0.44206
  -3   2  -349794.87 2197.64   1 0.62361-0.81602 0.32338-0.07408-0.71170 0.57325
   3   2   348239.63 2088.91   1 0.70595-0.51371 0.08370 0.16566-0.70329 0.84181
  -3  -2  -343865.55 1913.51   1 0.70614-0.89853-0.50895 0.25945-0.49226 0.35399
   3   2   431245.13 1473.03   1 0.66550-0.46871 0.26251-0.01290-0.69870 0.88325
  -3   2  -431047.97 1509.46   1 0.02599-0.22242-0.38930 0.63814-0.92074 0.73708
  -3  -2  -436419.93 1634.73   1 0.61934-0.81642-0.78443 0.53508 0.03285-0.21710
   3   2   426766.83 1208.56   1 0.61736-0.41985-0.59707 0.84633 0.51222-0.32778
   3   2   427272.92 1195.02   1 0.63476-0.43797 0.29762-0.04831-0.71308 0.89768
  -3   2  -428738.73 1324.35   1 0.65196-0.84859 0.25607-0.00670-0.71369 0.52900
  -3  -2  -435415.52 1548.49   1 0.72088-0.91764-0.44872 0.19930-0.52817 0.34381
   3  -2   5187671.3 1497.89   1 0.16802 0.03358 0.56760-0.81708 0.80597-0.57553
  -3   2  -5202133.7 1633.24   1 0.73732-0.93856 0.41309-0.16351-0.53451 0.30390
  -3   2  -5210558.2 2166.29   1 0.07930-0.28015-0.44674 0.69558-0.89113 0.66157
  -3  -2  -5200758.7 1941.00   1 0.61084-0.81230-0.79160 0.54215-0.01526-0.21500
   3   2   5195876.8 1649.38   1 0.51128-0.31007 0.52774-0.27851-0.67828 0.90899
  -3   2  -5195078.2 1838.90   1 0.67361-0.87462 0.19576 0.05360-0.71268 0.48182
  -3   2  -6107650.1 2627.34   1 0.75242-0.95805 0.45869-0.20910-0.47271 0.19599
   3   2   6105299.2 2746.47   1 0.72796-0.52233 0.38907-0.13948-0.56452 0.84125
  -3   2  -6109156.2 2945.81   1 0.12272-0.32798-0.49162 0.74045-0.86211 0.58663
   3   2   694565.04 2342.73   1 0.33519-0.12954 0.73768-0.48865-0.58605 0.86280
  -3   2  -694969.52 2407.02   1 0.68999-0.89540 0.14332 0.10605-0.70948 0.43244
  -3  -2  -6127573.0 3109.74   1 0.74002-0.94573-0.31330 0.06388-0.59515 0.31860
   3  -2   761212.82 2892.73   1 0.42236-0.21180 0.69161-0.94117 0.58589-0.26329
  -3   2  -777627.65 3660.81   1 0.75615-0.96617 0.47221-0.22262-0.45303 0.13019
   3   2   779799.17 3873.93   1 0.74656-0.53655 0.43966-0.19007-0.49933 0.82217
  -3   2  -780016.47 4032.59   1 0.15736-0.36742-0.52594 0.77509-0.83583 0.51402
  -3  -2  -756212.49 2754.95   1 0.59308-0.80350-0.79953 0.55009-0.09482-0.22755
   3   2   775844.35 3565.20   1 0.12839 0.08187 0.88746-0.63830-0.44262 0.76541
  -3   2  -773865.25 3526.92   1 0.70209-0.91189 0.09912 0.15025-0.70514 0.38193
  -3  -2  -757665.57 2723.96   1 0.74319-0.95338-0.24069-0.00872-0.62427 0.30163
   3  -2   817181.09 1499.07   1 0.46180-0.24675 0.70439-0.95399 0.53903-0.17030
  -3   2  -811498.08 1019.97   1 0.75666-0.97106 0.47416-0.22458-0.45013 0.08116
   3   2   811130.82 1107.18   1 0.75890-0.54450 0.48315-0.23356-0.43661 0.80558
  -3   2  -813356.40 1539.86   1 0.18475-0.39925-0.55242 0.80157-0.81283 0.44505
  -3  -2  -814764.90 1359.49   1 0.58404-0.79894-0.80132 0.55188-0.12947-0.23897
   3   2   810261.30  983.40   1-0.07476 0.28917 0.95913-0.70985-0.27287 0.64225
  -3   2  -810994.72 1022.24   1 0.71082-0.92501 0.06310 0.18627-0.70053 0.33114
  -3  -2  -816793.06 1450.33   1 0.74282-0.95699-0.16855-0.08084-0.64791 0.27859
   3  -2   916636.67 1281.26   1 0.48262-0.26310 0.71021-0.95980 0.51252-0.09770
   3   2   916690.52 1473.77   1 0.76624-0.54745 0.52058-0.27100-0.37665 0.79173
  -3   2  -915273.41 1171.93   1 0.75567-0.97446 0.47040-0.22082-0.45570 0.04061
  -3   2  -916161.83 1446.75   1 0.20604-0.42498-0.57248 0.82164-0.79360 0.37985
  -3  -2  -917804.76 1457.40   1 0.57486-0.79424-0.80206 0.55262-0.16193-0.25256
  -3   2  -915516.07 1237.24   1 0.71695-0.93552 0.03490 0.21447-0.69624 0.28068
  -3  -2  -914848.07 1119.83   1 0.73787-0.95644-0.10163-0.14776-0.66724 0.25175
   3  -2  1039872.87 1437.53   1 0.49288-0.26889 0.71282-0.96241 0.49895-0.03804
   3   2  1052466.87 2126.95   1 0.76959-0.54622 0.55277-0.30326-0.31963 0.78081
  -3   2 -1052709.15 2756.17   1 0.22231-0.44570-0.58750 0.83665-0.77808 0.31836
  -3  -2 -1036719.83 1474.14   1 0.56547-0.78933-0.80192 0.55247-0.19275-0.26779
  -3  -2 -1041178.51 1415.08   1 0.73080-0.95376-0.04412-0.20528-0.68116 0.21951
  -3  -2 -1035404.45 1234.94   1 0.39558-0.61949-0.91715 0.66787-0.04825-0.41252
   3  -2  1112031.76 1339.38   1 0.49654-0.26808 0.71371-0.96330 0.49402 0.01297
   3   2  1120730.54 2441.03   1 0.76971-0.54194 0.58074-0.33123-0.26508 0.77238
  -3   2 -1122418.65 2627.27   1 0.23442-0.46226-0.59850 0.84765-0.76605 0.26035
  -3  -2 -1114790.44 1748.61   1 0.55586-0.78420-0.80099 0.55154-0.22232-0.28428
  -3   2 -1121775.91 2403.73   1 0.72366-0.95103-0.00017 0.24958-0.69014 0.18233
  -3  -2 -1112747.54 1382.32   1 0.50319-0.73157-0.84587 0.59658-0.17689-0.32996
   3  -2  1279416.34 3583.18   1 0.49572-0.26279 0.71351-0.96310 0.49513 0.05795
   3   2  1289842.25 4181.47   1 0.76720-0.53503 0.60501-0.35549-0.21298 0.76639
  -3   2 -1283004.81 3877.46   1 0.24310-0.47538-0.60628 0.85543-0.75717 0.20551
  -3  -2 -1284039.28 3916.39   1 0.54598-0.77880-0.79934 0.54990-0.25088-0.30177
  -3   2 -1287326.36 3967.80   1 0.72507-0.95683-0.00815 0.25755-0.68862 0.13464
   3  -2  13 2107.27  395.33   1 0.49162-0.25423 0.71251-0.96210 0.50062 0.09855
   3   2  13  634.26  479.94   1 0.76249-0.52592 0.62610-0.37659-0.16308 0.76261
  -3   2 -13 1730.42  516.28   1 0.24890-0.48562-0.61143 0.86058-0.75113 0.15349
  -3  -2 -13 2644.95  518.41   1 0.53563-0.77253-0.79742 0.54823-0.27785-0.32033
  -3   2 -13  -76.20  236.61   1 0.72546-0.96162-0.01044 0.25985-0.68817 0.08802
   3  -2  1439054.53 2823.77   1 0.48500-0.24313 0.71083-0.96042 0.50940 0.13587
   3   2  1433695.44 2569.92   1 0.75618-0.51526 0.64409-0.39454-0.11544 0.76081
  -3   2 -1440794.52 3302.39   1 0.25225-0.49343-0.61439 0.86354-0.74758 0.10397
  -3  -2 -1443191.91 3198.06   1 0.52520-0.76656-0.79444 0.54525-0.30498-0.33922
  -3   2 -1437198.71 2686.75   1 0.72495-0.96551-0.00747 0.25687-0.68875 0.04244
   3  -2  15 2260.44  477.25   1 0.47630-0.22997 0.70851-0.95811 0.52070 0.17066
   3   2  15 3136.37  668.99   1 0.74801-0.50269 0.66005-0.41050-0.06931 0.76078
  -3   2 -15 1021.80  324.19   1 0.25352-0.49914-0.61551 0.86466-0.74623 0.05665
  -3  -2 -15 3043.46  765.39   1 0.51444-0.76026-0.79082 0.54163-0.33157-0.35864
  -3   2 -15 2311.58  441.54   1 0.72355-0.96851 0.00044 0.24896-0.69026-0.00221
   3  -2  16 5047.95  985.30   1 0.46584-0.21504 0.70557-0.95517 0.53399 0.20346
   3   2  16 4773.68 1066.66   1 0.73841-0.48869 0.67389-0.42434-0.02474 0.76231
  -3   2 -16 5147.64 1146.18   1 0.25298-0.50304-0.61503 0.86418-0.74681 0.01126
  -3  -2 -16 4112.96  900.04   1 0.50333-0.75360-0.78658 0.53739-0.35770-0.37853
   3   2  17 1653.59  543.73   1 0.72752-0.47339 0.68583-0.43627 0.01844 0.76521
  -3   2 -17 2366.06  718.21   1 0.25084-0.50535-0.61314 0.86230-0.74908-0.03244
  -3  -2 -17 5376.41 1238.15   1 0.49184-0.74657-0.78170 0.53251-0.38344-0.39880
   3   2  1816733.62 1202.60   1 0.71544-0.45692 0.69604-0.44649 0.06043 0.76933
  -3   2 -1816371.70 2660.85   1 0.24728-0.50624-0.60999 0.85915-0.75282-0.07466
  -3  -2 -1818660.39 1237.19   1 0.47996-0.73915-0.77619 0.52700-0.40884-0.41941
  -3  -3  18 2424.59  678.78   1 0.19182-0.29074 0.58177-0.95599 0.79040 0.03917
  -3   3  18 3199.66  904.55   1 0.64008-0.73903 0.72491-0.35045 0.25451 0.57533
   3   3 -18 1210.58  386.24   1 0.24941-0.15050-0.61188 0.98561-0.75059-0.07690
   3  -3 -18 1992.40  656.66   1 0.59822-0.49981-0.79794 0.42377-0.07361-0.75537
   3   3 -18 2732.69  803.43   1 0.73623-0.63791-0.35340 0.72752-0.57711-0.25252
  -3  -3  17 5361.23 1410.07   1 0.19115-0.29454 0.58138-0.95561 0.79085-0.00736
  -3   3  17 6489.83 1021.92   1 0.65200-0.75541 0.72286-0.34840 0.22880 0.55493
   3   3 -17 4515.94 1285.72   1 0.25239-0.14903-0.61451 0.98824-0.74744-0.03408
   3  -3 -17 7587.25 1122.71   1 0.60815-0.50527-0.79330 0.41913-0.02860-0.75433
   3   3 -17 7171.41  991.96   1 0.73408-0.63128-0.37107 0.74519-0.56870-0.21484
   3  -3 -17 6573.61  871.00   1 0.34751-0.24474-0.93765 0.56368 0.00543-0.78890
  -3  -3  16 6330.39 1311.41   1 0.18783-0.29568 0.57943-0.95366 0.79307-0.05567
   3   3 -16 5611.19 1132.58   1 0.25355-0.14575-0.61553 0.98926-0.74620 0.01065
   3  -3 -16 8041.43 1358.48   1 0.61681-0.50932-0.78689 0.41287 0.01808-0.75506
   3   3 -16 6071.90 1008.22   1 0.73193-0.62466-0.38658 0.76071-0.56108-0.17637
   3  -3 -16 8198.70 1681.29   1 0.30083-0.19357-0.95207 0.57809 0.05529-0.79267
  -3  -3  1536512.48 3556.55   1 0.18157-0.29388 0.57573-0.94995 0.79722-0.10590
  -3   3  1538371.30 3145.61   1 0.67399-0.78634 0.71709-0.34263 0.17746 0.51407
   3   3 -1535408.39 3588.25   1 0.25259-0.14034-0.61469 0.98842-0.74722 0.05764
   3  -3 -1537917.21 3070.05   1 0.62459-0.51262-0.77809 0.40407 0.06666-0.75758
   3   3 -1538009.10 3090.10   1 0.72990-0.61816-0.39989 0.77401-0.55436-0.13700
  -3  -3  1414083.21 1932.67   1 0.17200-0.28878 0.57000-0.94423 0.80343-0.15820
  -3   3  1411173.80 1029.78   1 0.68411-0.80091 0.71340-0.33893 0.15182 0.49361
   3   3 -1410474.29 2026.90   1 0.24913-0.13244-0.61163 0.98536-0.75088 0.10727
   3  -3 -1414937.66 1210.66   1 0.63105-0.51460-0.76681 0.39279 0.11730-0.76216
   3   3 -1412948.78 1264.99   1 0.72809-0.61187-0.41090 0.78503-0.54866-0.09661
  -3  -3  1327015.27 1970.07   1 0.15871-0.27995 0.56193-0.93615 0.81181-0.21267
  -3   3  1326216.58 1843.67   1 0.69364-0.81492 0.70917-0.33471 0.12618 0.47315
   3   3 -1323897.43 2035.00   1 0.24265-0.12151-0.60587 0.97960-0.75764 0.16001
   3  -3 -1330334.18 2190.74   1 0.63598-0.51505-0.75270 0.37867 0.17017-0.76897
  -3   3  1326206.76 1801.60   1-0.14973 0.02740 0.96742-0.59349-0.20413 0.80437
   3   3 -1327087.18 1983.86   1 0.72658-0.60589-0.41951 0.79363-0.54413-0.05505
  -3  -3  12 3792.23  786.73   1 0.14121-0.26692 0.55108-0.92530 0.82241-0.26936
  -3   3  12 3438.77  617.99   1 0.70226-0.82867 0.70467-0.33033 0.10132 0.45184
   3   3 -12 4793.95  812.19   1 0.23244-0.10685-0.59671 0.97044-0.76805 0.21638
   3  -3 -12 2096.99  601.90   1 0.63911-0.51370-0.73533 0.36130 0.22544-0.77818
  -3   3  12 2392.73  466.46   1-0.09595-0.03076 0.96248-0.58855-0.25380 0.80787
   3   3 -12 3975.77  704.16   1 0.72548-0.60031-0.42554 0.79967-0.54091-0.01218
  -3  -3  1143379.60 2048.59   1 0.11896-0.24913 0.53692-0.91114 0.83520-0.32823
  -3   3  1143272.48 2156.72   1 0.71071-0.84153 0.69940-0.32507 0.07562 0.43144
   3   3 -1145802.97 2229.03   1 0.21755-0.08752-0.58314 0.95687-0.78269 0.27700
   3  -3 -1141658.36 2050.59   1 0.63988-0.51007-0.71444 0.34044 0.28307-0.78988
  -3   3  1139095.92 1948.04   1-0.04066-0.09043 0.95213-0.57819-0.30297 0.81086
   3   3 -1147843.48 2476.67   1 0.72487-0.59523-0.42878 0.80290-0.53916 0.03216
  -3  -3  10 8064.79 1290.26   1 0.09135-0.22598 0.51881-0.89303 0.84999-0.38911
  -3   3  1010703.41 1276.22   1 0.71862-0.85384 0.69360-0.31927 0.04987 0.41110
   3   3 -1013861.41 1722.78   1 0.19669-0.06221-0.56373 0.93746-0.80219 0.34247
   3  -3 -10 7734.34 1050.10   1 0.63823-0.50393-0.68893 0.31494 0.34352-0.80427
  -3   3  1011077.00 1809.90   1 0.01571-0.15063 0.93582-0.56208-0.35211 0.81324
   3   3 -1015383.57 1869.44   1 0.72484-0.59072-0.42895 0.80307-0.53907 0.07816
  -3  -3   973060.74 2641.15   1 0.05792-0.19690 0.49646-0.87060 0.86612-0.45086
  -3   3   951667.03 2052.49   1 0.72600-0.86562 0.68727-0.31294 0.02404 0.39083
   3   3  -951630.07 2485.54   1 0.16808-0.02915-0.53639 0.91012-0.82706 0.41331
   3  -3  -971427.36 2638.82   1 0.63343-0.49464-0.65836 0.28437 0.40658-0.82125
  -3   3   947404.28 1814.39   1 0.07317-0.21252 0.91391-0.54017-0.39926 0.81427
   3   3  -950467.86 2033.03   1 0.72545-0.58686-0.42569 0.79982-0.54083 0.12600
  -3  -3   8117773.1 4051.11   1 0.01789-0.16135 0.46811-0.84225 0.88348-0.51436
  -3   3   8120555.2 4218.65   1 0.73284-0.87688 0.68038-0.30605-0.00190 0.37068
   3   3  -8116605.8 4019.74   1 0.12943 0.01399-0.49839 0.87165-0.85723 0.48992
   3  -3  -8112339.4 3942.07   1 0.62480-0.48152-0.62193 0.24793 0.47203-0.84063
  -3   3   8111920.1 4093.62   1 0.13113-0.27491 0.88601-0.51227-0.44472 0.81362
  -3  -3   765514.80 2057.69   1-0.02899-0.11894 0.43333-0.80747 0.90076-0.57778
  -3   3   771481.74 1975.48   1 0.73917-0.88760 0.67293-0.29860-0.02801 0.35069
   3   3  -767648.18 1951.92   1 0.07737 0.07046-0.44471 0.81796-0.89232 0.57093
   3  -3  -768151.88 1906.16   1 0.61158-0.46422-0.57936 0.20547 0.53879-0.86155
  -3   3   764874.50 1856.12   1 0.18908-0.33729 0.85211-0.47837-0.48800 0.81079
   3   3  -774875.90 2281.40   1 0.72874-0.58120-0.40702 0.78114-0.55069 0.22805
  -3  -3   642457.03 2069.84   1-0.08278-0.06963 0.39134-0.76548 0.91651-0.63967
  -3   3   630955.21 1600.21   1 0.74497-0.89781 0.66487-0.29054-0.05434 0.33093
   3   3  -628047.89 2458.69   1 0.00837 0.14388-0.36977 0.74303-0.92908 0.65360
  -3  -3   637534.79 1821.74   1 0.50478-0.65700-0.78716 0.41338-0.35436 0.63044
   3  -3  -638737.39 1960.71   1 0.59286-0.44094-0.52872 0.15483 0.60742-0.88407
  -3   3   630216.64 1986.47   1 0.24636-0.39930 0.81268-0.43914-0.52805 0.80480
   3   3  -625542.51 2365.89   1 0.73138-0.57936-0.39036 0.76449-0.55919 0.28264
  -3  -3   529476.24 2286.65   1-0.14311-0.01374 0.34115-0.71521 0.92904-0.69876
  -3   3   532737.82 1651.30   1 0.75024-0.90749 0.65617-0.28184-0.08099 0.31148
   3   3  -535565.92 1738.51   1-0.08035 0.23705-0.26663 0.64058-0.96044 0.73038
  -3  -3   527662.14 2386.16   1 0.45528-0.61195-0.76340 0.38962-0.45818 0.68826
   3  -3  -528472.41 2537.76   1 0.56775-0.41127-0.46991 0.09602 0.67589-0.90644
  -3   3   534753.89 1733.89   1 0.30233-0.45966 0.76746-0.39392-0.56532 0.79595
   3   3  -540083.01 2140.34   1 0.73450-0.57801-0.36776 0.74188-0.57030 0.33985
  -3  -3   483682.98 3971.60   1-0.20864 0.04731 0.28374-0.65780 0.93592-0.75170
  -3   3   479324.71 3806.84   1 0.75500-0.91664 0.64675-0.27242-0.10808 0.29247
  -3  -3   479557.78 3749.81   1 0.38306-0.54416-0.71797 0.34404-0.58118 0.76518
   3  -3  -482881.92 3977.75   1 0.53536-0.37432-0.40278 0.02884 0.74239-0.92684
  -3  -3   481647.75 3845.64   1 0.19025-0.35142 0.13051-0.50454 0.97302-0.78862
  -3   3   476944.96 3690.67   1 0.35619-0.51791 0.71732-0.34377-0.59881 0.78331
   3   3  -479326.57 3895.43   1 0.73784-0.57688-0.33818 0.71231-0.58412 0.39976
  -3  -3   347636.55 2302.27   1-0.27766 0.11186 0.21926-0.59332 0.93532-0.79715
  -3   3   341813.22 2040.22   1 0.75900-0.92515 0.63675-0.26248-0.13586 0.27421
  -3  -3   342693.89 2039.09   1 0.27909-0.44469-0.63762 0.26390-0.71800 0.85592
  -3  -3   345888.37 2177.80   1 0.31334-0.47901-0.03721-0.33682 0.94890-0.81061
  -3   3   342191.19 2087.86   1 0.40765-0.57371 0.66300-0.28917-0.62788 0.76631
   3   3  -343037.94 2194.02   1 0.74092-0.57548-0.30043 0.67456-0.60063 0.46236
  -3   3   288821.26 2252.08   1 0.76267-0.93322 0.62547-0.25121-0.16464 0.25687
   3  -3  -272058.89 3415.62   1 0.65042-0.47987 0.23672-0.61113-0.72174 0.62946
   3   3  -282445.10 3933.89   1 0.34708-0.17655-0.14890 0.52349-0.92593 0.83353
  -3  -3   270561.75 3318.47   1 0.14040-0.31033-0.50939 0.13613-0.84900 0.94082
  -3  -3   276465.67 3601.78   1 0.43166-0.60181-0.21760-0.15642 0.87539-0.78316
  -3   3   297652.49 2535.21   1 0.45508-0.62553 0.60577-0.23194-0.65263 0.74492
   3   3  -291956.07 2448.24   1 0.74298-0.57306-0.25309 0.62722-0.61961 0.52742
  -3   3   190400.91 2297.35   1 0.76575-0.94071 0.61285-0.23858-0.19499 0.24111
   3  -3  -196097.12 2408.53   1 0.58936-0.41440 0.14239-0.51698-0.79521 0.74899
   3   3  -189179.24 2316.40   1 0.41579-0.24085-0.07497 0.44956-0.90636 0.86016
  -3  -3   191972.53 2305.98   1-0.02159-0.15274-0.33591-0.03734-0.94164 0.98755
  -3  -3   198126.85 2447.69   1 0.52479-0.69955-0.38211 0.00817 0.76064-0.71452
  -3   3   1103094.4 2700.14   1 0.49836-0.67321 0.54678-0.17295-0.67279 0.71893
   3   3  -196041.14 2547.92   1 0.74380-0.56920-0.19537 0.56947-0.63920 0.59304
  -3   3   024093.28 1077.94   1 0.76818-0.94754 0.59823-0.22396-0.22804 0.22804
   3  -3   020310.31 1794.82   1 0.47994-0.30060-0.00044-0.37414-0.87729 0.87729
   3   3   022441.54 1134.70   1 0.48048-0.30114 0.00019 0.37440-0.87700 0.87700
  -3  -3   019991.17 1772.16   1 0.58549-0.76477-0.51065 0.13676 0.62962-0.62962
   3  -3   019818.06 1796.07   1 0.33555-0.15624-0.06913-0.30489 0.93948-0.93948
  -3   3   025273.36 1226.12   1 0.53729-0.71654 0.48747-0.11352-0.68823 0.68823
   3   3   020752.29 1897.45   1 0.73993-0.56094-0.12415 0.49826-0.66111 0.66111
  -3   3  -145277.07 2131.21   1-0.28931 0.10565 0.20794 0.16611 0.93437-0.98043
  -3   3  -145410.68 2158.07   1 0.76974-0.95349 0.58020-0.20593-0.26618 0.22006
   3   3   143550.05 2149.62   1 0.53968-0.35600 0.07402 0.30056-0.83860 0.88482
  -3  -3  -144240.21 2117.43   1 0.61873-0.80256-0.60150 0.22761 0.50532-0.55143
   3   3   142188.99 2004.93   1 0.31198-0.12831-0.03526 0.40929 0.94943-0.90333
   3  -3   146285.85 2252.87   1 0.27411-0.09044 0.01815-0.39218 0.96152-0.91542
   3   3   143442.09 2124.99   1 0.73001-0.54662-0.03881 0.41292-0.68232 0.72848
  -3   3  -2 2926.27  292.61   1 0.03243-0.22068 0.47855-0.10440 0.87746-0.96974
  -3   3  -2 3028.69  289.60   1 0.76970-0.95786 0.55500-0.18073-0.31546 0.22323
   3   3   2 3682.08  559.76   1 0.59114-0.40311 0.14495 0.22962-0.79343 0.88587
  -3  -3  -2 2628.28  295.78   1 0.63431-0.82251-0.66290 0.28891 0.39775-0.48990
   3   3   2 2208.19  265.98   1 0.40873-0.22028-0.18066 0.55469 0.89459-0.80236
   3  -3   2 2587.64  346.77   1 0.21288-0.02471 0.10093-0.47497 0.97184-0.87965
  -3   3  -2 1980.65  284.58   1 0.60044-0.78846 0.37293 0.00102-0.70738 0.61508
   3   3   2 2763.11  361.86   1 0.71123-0.52338 0.06131 0.31275-0.70027 0.79262
  -3   3  -3287450.6 6889.00   1 0.44007-0.63278 0.69763-0.32324 0.56536-0.70363
  -3   3  -3293562.7 7043.92   1 0.76425-0.95672 0.50857-0.13420-0.39656 0.25820
  -3   3  -3293082.6 7149.87   1-0.15400-0.03829-0.17618 0.55013-0.97223 0.83419
  -3  -3  -3287348.2 6981.37   1 0.63957-0.83226-0.70498 0.33099 0.30649-0.44471
   3   3   3272574.4 6598.33   1 0.47444-0.28137-0.29003 0.66397 0.83113-0.69279
  -3   3  -3305875.9 7479.86   1 0.62506-0.81746 0.32013 0.05382-0.71191 0.57346
   3   3   3284464.6 6911.12   1 0.67999-0.48775 0.17618 0.19788-0.71173 0.85025
  -3   3  -448281.20 2261.52   1 0.69925-0.89613 0.70634-0.33201 0.11008-0.29447
  -3   3  -450921.67 2387.59   1 0.72726-0.92404 0.38736-0.01295-0.56660 0.38205
  -3   3  -449583.59 2668.96   1-0.09974-0.09700-0.24331 0.61725-0.96480 0.78075
  -3  -3  -436698.25 1805.78   1 0.63924-0.83632-0.73405 0.36003 0.22919-0.41344
   3   3   450040.34 2415.22   1 0.63229-0.43550 0.30346 0.07049-0.71282 0.89742
  -3   3  -451667.12 2527.38   1 0.64543-0.84222 0.27155 0.10239-0.71390 0.52931
  -3   3  -539870.17 1874.16   1 0.75919-0.96055 0.63622-0.26196-0.13724-0.09333
   3   3   542927.58 2199.08   1 0.70001-0.49885 0.32727 0.04713-0.63471 0.86540
  -3   3  -540976.33 1926.22   1 0.57549-0.77658 0.12267 0.25190-0.80855 0.57745
  -3   3  -542989.85 2663.26   1-0.05097-0.15022-0.30134 0.67528-0.95215 0.72209
  -3  -3  -552258.26 2531.04   1 0.63540-0.83696-0.75484 0.38081 0.16271-0.39301
   3   3   540650.35 1962.22   1 0.56601-0.36484 0.43853-0.06457-0.69807 0.92882
  -3   3  -540985.77 2031.73   1 0.66246-0.86348 0.22787 0.14619-0.71358 0.48272
  -3  -3  -549887.38 2399.57   1 0.73634-0.93757-0.35245-0.02167-0.57756 0.34710
  -3   3  -6 3292.48  269.66   1 0.76851-0.97427 0.59552-0.22125-0.23394-0.04276
   3   3   6 3817.66  617.65   1 0.72289-0.51727 0.37692-0.00254-0.57909 0.85581
  -3   3  -6 3127.01  268.67   1 0.34924-0.55500-0.14665 0.52125-0.92548 0.64827
  -3   3  -6 4231.45  530.98   1-0.00837-0.19688-0.35095 0.72420-0.93635 0.66087
  -3  -3  -6 4058.14  445.68   1 0.62957-0.83561-0.76988 0.39585 0.10446-0.38083
   3   3   6 2435.67  268.78   1 0.47875-0.27316 0.57438-0.20055-0.66397 0.94083
  -3   3  -6 2693.08  356.77   1 0.67570-0.88111 0.18943 0.18462-0.71241 0.43537
  -3  -3  -6 3701.55  350.08   1 0.74007-0.94578-0.31259-0.06152-0.59545 0.31890
   3  -3   724183.56 1947.36   1-0.15778 0.36826 0.32861-0.70266 0.93119-0.60880
  -3   3  -713481.89 1100.43   1 0.77001-0.98018 0.56929-0.19503-0.28804-0.03477
   3   3   714586.10 1366.47   1 0.74037-0.53036 0.42150-0.04713-0.52361 0.84645
  -3   3  -716205.68 1880.58   1 0.02838-0.23806-0.39194 0.76520-0.91955 0.59815
  -3  -3  -727560.50 2501.16   1 0.62248-0.83300-0.78086 0.40684 0.05250-0.37493
   3   3   713086.21 1323.95   1 0.37139-0.16135 0.70188-0.32834-0.60780 0.93067
  -3   3  -714744.84 1303.19   1 0.68611-0.89590 0.15642 0.21764-0.71047 0.38726
  -3  -3  -721701.15 1775.90   1 0.74225-0.95244-0.27538-0.09874-0.61091 0.28827
   3  -3   8 1739.85  335.54   1-0.01420 0.22933 0.44448-0.81862 0.89567-0.52655
  -3   3  -8  779.14  199.88   1 0.76931-0.98388 0.54830-0.17403-0.32788-0.04105
   3   3   8  561.03  482.95   1 0.75316-0.53876 0.46128-0.08691-0.46899 0.83796
  -3   3  -8  395.03  195.71   1 0.05946-0.27356-0.42566 0.79892-0.90292 0.53561
  -3  -3  -8 1464.07  375.68   1 0.61453-0.82953-0.78887 0.41485 0.00537-0.37386
   3   3   8  193.42  111.82   1 0.24859-0.03415 0.81101-0.43746-0.52958 0.89858
  -3   3  -8  220.84  301.86   1 0.69413-0.90832 0.12883 0.24523-0.70822 0.33883
  -3  -3  -8 1106.38  185.71   1 0.74318-0.95784-0.24194-0.13218-0.62381 0.25508
   3  -3   9141726.4 4827.16   1 0.08447 0.13499 0.51420-0.88843 0.85349-0.43870
  -3   3  -9130284.0 4443.70   1 0.76752-0.98631 0.52997-0.15560-0.36059-0.05449
   3   3   9176555.5 6219.28   1 0.76194-0.54315 0.49671-0.12234-0.41557 0.83066
  -3   3  -9183721.7 6378.06   1 0.08534-0.30386-0.45309 0.82634-0.88736 0.47414
  -3  -3  -9147991.9 5182.54   1 0.60620-0.82558-0.79440 0.42023-0.03792-0.37657
   3   3   9162863.1 5552.24   1 0.11530 0.10382 0.89421-0.52048-0.43252 0.84753
  -3   3  -9168963.7 5860.52   1 0.70016-0.91874 0.10655 0.26750-0.70597 0.29042
  -3  -3  -9134376.5 4600.59   1 0.74412-0.96269-0.21326-0.16084-0.63308 0.21760
   3   3  1020406.52 2326.94   1 0.76731-0.54394 0.52814-0.15387-0.36371 0.82488
  -3   3 -1023181.56 2864.58   1 0.10658-0.32951-0.47514 0.84839-0.87343 0.41429
  -3  -3 -1031467.24 1296.35   1 0.59710-0.82096-0.79832 0.42416-0.07832-0.38222
   3   3  1020049.81 2170.50   1-0.01980 0.24298 0.94685-0.57292-0.32103 0.78276
  -3   3 -1022223.54 2206.56   1 0.70454-0.92751 0.08942 0.28464-0.70400 0.24226
   3  -3  1111662.54 1492.43   1 0.19839 0.03000 0.58560-0.95982 0.78594-0.27898
   3   3  1116125.94 1230.19   1 0.76976-0.54199 0.55624-0.18197-0.31314 0.82044
  -3   3 -1118847.98 1816.95   1 0.12372-0.35107-0.49263 0.86588-0.86139 0.35634
  -3  -3 -1112164.09 1529.52   1 0.58756-0.81590-0.80076 0.42660-0.11634-0.39026
  -3   3 -1116736.60 1155.49   1 0.70753-0.93488 0.07719 0.29687-0.70245 0.19454
   3  -3  1218522.18 2128.80   1 0.22969 0.00316 0.60333-0.97755 0.76369-0.21064
   3   3  1224498.07 1861.60   1 0.76969-0.53752 0.58125-0.20698-0.26403 0.81745
  -3   3 -1224360.19 1988.45   1 0.13727-0.36903-0.50626 0.87952-0.85138 0.30042
  -3  -3 -1221658.00 1616.59   1 0.57762-0.81044-0.80194 0.42777-0.15243-0.40023
  -3   3 -1222736.33 1540.46   1 0.70931-0.94106 0.06963 0.30443-0.70144 0.14736
   3   3  13 2966.56  659.66   1 0.76743-0.53086 0.60352-0.22925-0.21632 0.81585
  -3   3 -13 4458.64  863.35   1 0.14768-0.38386-0.51662 0.88987-0.84338 0.24650
  -3  -3 -13 7613.59 1012.54   1 0.56729-0.80460-0.80201 0.42784-0.18693-0.41178
  -3   3 -13 3418.35  527.99   1 0.71004-0.94618 0.06651 0.30755-0.70101 0.10075
   3   3  14 8271.15 1382.62   1 0.76326-0.52229 0.62333-0.24906-0.16993 0.81558
  -3   3 -1410511.81 1944.33   1 0.15505-0.39622-0.52367 0.89740-0.83768 0.19408
  -3  -3 -14 9555.86 1481.65   1 0.55659-0.79837-0.80109 0.42692-0.22012-0.42464
  -3   3 -14 7709.94 1195.73   1 0.70978-0.95031 0.06762 0.30644-0.70116 0.05473
   3   3  1510879.22 1078.93   1 0.75765-0.51233 0.64057-0.26624-0.12500 0.81647
  -3   3 -1510373.20 1391.97   1 0.16027-0.40589-0.52879 0.90251-0.83348 0.14390
  -3  -3 -15 7586.59 1574.13   1 0.54551-0.79177-0.79925 0.42508-0.25220-0.43862
  -3   3 -1511104.41  923.67   1 0.70857-0.95349 0.07279 0.30127-0.70187 0.00927
   3   3  1613649.78 1504.45   1 0.75024-0.50052 0.65617-0.28184-0.08099 0.81855
  -3   3 -1613695.09 2297.72   1 0.16335-0.41342-0.53179 0.90552-0.83096 0.09541
  -3  -3 -1620282.02 1808.06   1 0.53391-0.78419-0.79697 0.42319-0.28242-0.45381
  -3   3 -1613294.11 1179.45   1 0.70639-0.95570 0.08190 0.29215-0.70306-0.03570
  -3   3 -17 8963.79 1590.08   1 0.16453-0.41904-0.53294 0.90667-0.83000 0.04847
  -3  -3 -1710072.53  941.98   1 0.52210-0.77683-0.79345 0.41967-0.31278-0.46946
  -3  -4  16  354.05  183.05   1 0.03607-0.14370 0.48114-0.98000 0.87589-0.13765
  -3   4  16 2996.08  882.80   1 0.68042-0.78830 0.71483-0.21555 0.16134 0.57629
   3   4 -16 1997.50  657.84   1 0.12532-0.01722-0.49425 0.99192-0.86023 0.12562
   3  -4 -16  675.55  533.67   1 0.62534-0.51785-0.77702 0.27832 0.07194-0.80892
   3   4 -16 3547.32  972.09   1 0.74269-0.63542-0.26364 0.76247-0.61554-0.12191
  -3  -4  15 2264.96  683.63   1 0.02547-0.13757 0.47357-0.97243 0.88038-0.18828
  -3   4  15 1182.15  528.89   1 0.69068-0.80302 0.71057-0.21128 0.13431 0.55722
   3   4 -15 1861.55  522.16   1 0.11770-0.00519-0.48651 0.98419-0.86570 0.17700
   3  -4 -15 2086.33  663.64   1 0.63142-0.51945-0.76598 0.26728 0.12069-0.81161
   3   4 -15 1954.80  746.24   1 0.74234-0.63060-0.27317 0.77201-0.61179-0.07957
  -3  -4  1416094.67 1682.00   1 0.01142-0.12800 0.46341-0.96226 0.88606-0.24010
   3   4 -1413222.66 2364.31   1 0.10678 0.01014-0.47534 0.97301-0.87329 0.23050
  -3   4  1415324.18 1181.82   1-0.11290-0.00503 0.96459-0.46601-0.23834 0.88476
   3   4 -1418302.66 1674.09   1 0.74204-0.62582-0.28028 0.77911-0.60894-0.03633
  -3  -4  1321848.08 1963.04   1-0.00633-0.11472 0.45034-0.94920 0.89283-0.29300
  -3   4  1315067.33 1475.53   1 0.70904-0.83105 0.70051-0.20140 0.08083 0.51843
   3   4 -1313916.30 1927.27   1 0.09198 0.02935-0.46002 0.95770-0.88312 0.28625
  -3   4  1311200.89 2255.57   1-0.05924-0.06308 0.95619-0.45761-0.28666 0.88690
   3   4 -1316413.42 1484.94   1 0.74182-0.62112-0.28483 0.78366-0.60709 0.00791
  -3  -4  12 5799.26 1016.26   1-0.02809-0.09744 0.43401-0.93286 0.90046-0.34678
  -3   4  12 5907.69  908.95   1 0.71752-0.84393 0.69447-0.19536 0.05357 0.49959
   3   4 -12 4700.16  975.03   1 0.07264 0.05312-0.43970 0.93737-0.89520 0.34424
  -3   4  12 4183.35 1051.09   1-0.00510-0.12161 0.94269-0.44412-0.33360 0.88767
   3   4 -12 5892.11 1012.80   1 0.74172-0.61655-0.28667 0.78550-0.60635 0.05325
  -3  -4  1118474.33 1880.68   1-0.05409-0.07592 0.41401-0.91287 0.90866-0.40111
  -3   4  1115382.97 1303.14   1 0.72541-0.85623 0.68781-0.18870 0.02618 0.48089
   3   4 -1114956.56 1336.86   1 0.04791 0.08226-0.41323 0.91091-0.90936 0.40431
   3  -4 -1116861.21 1376.80   1 0.63879-0.50898-0.69433 0.19568 0.33142-0.83823
  -3   4  1112666.51 1963.68   1 0.04907-0.17955 0.92379-0.42547-0.37973 0.88697
   3   4 -1116772.26 1537.55   1 0.74178-0.61213-0.28559 0.78442-0.60679 0.09978
  -3  -4  1050388.83 3044.84   1-0.08451-0.04998 0.38995-0.88880 0.91694-0.45554
  -3   4  1041268.41 2592.81   1 0.73271-0.86793 0.68053-0.18142-0.00137 0.46234
   3   4 -1036992.05 2294.65   1 0.01687 0.11772-0.37923 0.87691-0.92514 0.46601
   3  -4 -1045590.21 2817.19   1 0.63518-0.50088-0.66777 0.16912 0.38808-0.84882
  -3   4  1040766.46 3113.18   1 0.10318-0.23809 0.90020-0.40188-0.42306 0.88419
   3   4 -1048048.83 3088.82   1 0.74199-0.60787-0.28136 0.78019-0.60851 0.14759
  -3  -4   9 4724.05  836.66   1-0.11946-0.01951 0.36141-0.86027 0.92471-0.50945
  -3   4   9 5796.45  775.88   1 0.73943-0.87906 0.67260-0.17348-0.02913 0.44401
   3   4  -9 5859.61  823.57   1-0.02129 0.16018-0.33563 0.83422-0.94175 0.52764
   3  -4  -9 3602.01  544.64   1 0.62870-0.48991-0.63699 0.13834 0.44605-0.86072
  -3   4   9 7602.14 1017.17   1 0.15671-0.29606 0.87180-0.37348-0.46410 0.87911
  -3  -4   8 4466.38  769.72   1-0.15891 0.01546 0.32764-0.82638 0.93134-0.56289
  -3   4   8 2554.97  546.31   1 0.74556-0.88959 0.66397-0.16486-0.05717 0.42595
   3   4  -8 1583.67  333.33   1-0.06799 0.21133-0.28133 0.77993-0.95719 0.58910
   3  -4  -8 3628.47  610.40   1 0.61892-0.47611-0.60210 0.10358 0.50438-0.87326
  -3   4   8 2229.63  408.57   1 0.20926-0.35342 0.83912-0.34106-0.50207 0.87107
   3   4  -8 2453.27  615.74   1 0.74273-0.59967-0.26221 0.76105-0.61610 0.24737
  -3  -4   721762.89 2401.56   1-0.20246 0.05454 0.28930-0.78805 0.93557-0.61318
  -3   4   721065.35 2364.74   1 0.75109-0.89952 0.65462-0.15551-0.08555 0.40824
   3   4  -721636.99 2348.98   1-0.12368 0.27148-0.21403 0.71263-0.96896 0.64687
   3  -4  -722407.89 2234.07   1 0.60539-0.45803-0.56167 0.06315 0.56392-0.88668
  -3   4   722470.52 2392.51   1 0.26036-0.40890 0.80199-0.30393-0.53759 0.86047
   3   4  -720441.71 2410.78   1 0.74311-0.59557-0.24656 0.74540-0.62208 0.29944
  -3  -4   680280.52 2834.25   1-0.24961 0.09722 0.24598-0.74472 0.93658-0.66024
  -3   4   695209.47 3427.41   1 0.75601-0.90885 0.64448-0.14537-0.11437 0.39096
   3  -4  -680454.07 2919.19   1 0.58768-0.43576-0.51594 0.01742 0.62323-0.89989
  -3  -4   680231.25 2791.51   1 0.18840-0.34056 0.13290-0.63162 0.97305-0.69647
  -3   4   692956.03 3596.80   1 0.30953-0.46247 0.76114-0.26308-0.56994 0.84669
   3   4  -698983.16 3704.06   1 0.74419-0.59157-0.22690 0.72570-0.62824 0.35125
  -3  -4   514673.33 1275.42   1-0.29950 0.14265 0.19793-0.69667 0.93333-0.70305
  -3   4   5 9704.38  915.05   1 0.76008-0.91743 0.63371-0.13468-0.14380 0.37439
   3  -4  -514730.54 1339.36   1 0.56540-0.40892-0.46477-0.03374 0.68139-0.91194
  -3  -4   515014.84 1251.12   1 0.26060-0.41726 0.03678-0.53549 0.96474-0.73425
  -3   4   510739.53 1686.32   1 0.35635-0.51368 0.71716-0.21910-0.59890 0.82953
   3   4  -511923.08 1191.85   1 0.74394-0.58693-0.20149 0.70029-0.63714 0.40631
  -3   4   4108277.4 3775.26   1 0.76370-0.92545 0.62167-0.12265-0.17397 0.35844
   3   4  -4105353.4 3667.67   1 0.35020-0.18848-0.14565 0.64511-0.92527 0.74047
   3  -4  -4103856.3 3643.81   1 0.53816-0.37713-0.40836-0.09022 0.73730-0.92175
  -3  -4   4107140.3 3651.14   1 0.33671-0.49787-0.07114-0.42756 0.93891-0.75452
  -3   4   4105657.1 3702.46   1 0.40080-0.56246 0.67070-0.17226-0.62410 0.80867
   3   4  -4112177.4 3985.15   1 0.74290-0.58150-0.17034 0.66915-0.64735 0.46269
  -3   4   3 6510.73  664.51   1 0.76660-0.93275 0.60846-0.10944-0.20513 0.34348
   3   4  -3 7279.09  722.05   1 0.40221-0.23608-0.09003 0.58949-0.91110 0.77250
  -3  -4   3 6223.35  891.82   1 0.21935-0.38495-0.58479 0.08649-0.78095 0.91887
   3  -4  -310114.05 1026.02   1 0.50616-0.34055-0.34694-0.15164 0.78957-0.92791
  -3  -4   3 9681.50  836.71   1 0.41152-0.57709-0.18510-0.31360 0.89240-0.75406
  -3   4   3 5827.11  704.24   1 0.44170-0.60776 0.62264-0.12419-0.64591 0.78434
   3   4  -3 8124.42  979.22   1 0.74062-0.57482-0.13287 0.63168-0.65864 0.52015
  -3   4   2 7531.96  706.26   1 0.76870-0.93925 0.59382-0.09479-0.23762 0.32986
   3   4  -2 7425.00  806.07   1 0.45325-0.28272-0.03216 0.53163-0.89079 0.79839
  -3  -4   2 7176.13  996.22   1 0.11736-0.28729-0.48617-0.01150-0.86594 0.95777
  -3  -4   214026.24 1183.09   1 0.47869-0.64888-0.29746-0.20112 0.82605-0.73382
   3  -4  -211244.02 1037.28   1 0.46948-0.29929-0.28141-0.21716 0.83689-0.92911
  -3   4   2 7518.50  754.99   1 0.47921-0.64967 0.57376-0.07531-0.66419 0.75647
   3   4  -2 7338.29  835.82   1 0.73647-0.56627-0.08845 0.58725-0.67065 0.57832
  -3   4   120060.99 1575.27   1 0.76986-0.94481 0.57735-0.07832-0.27198 0.31810
   3   4  -117799.40 1444.49   1 0.50258-0.32762 0.02648 0.47296-0.86412 0.81790
   3  -4  -1 9867.37  770.76   1 0.44249-0.26755-0.04466-0.45479-0.89565 0.84945
  -3  -4   112354.19  973.35   1 0.53417-0.70894-0.40043-0.09815 0.74451-0.69840
   3  -4  -111342.01  968.39   1 0.42885-0.25412-0.21301-0.28568 0.87789-0.92401
  -3   4   121791.01 1728.87   1 0.51317-0.68801 0.52490-0.02645-0.67906 0.72521
   3   4  -119715.33 1597.70   1 0.72967-0.55507-0.03650 0.53531-0.68282 0.63665
  -3   4   074049.77 1908.41   1 0.76984-0.94920 0.55843-0.05940-0.30901 0.30901
   3   4   078263.60 2144.14   1 0.54805-0.36874 0.08514 0.41430-0.83209 0.83209
   3  -4   069119.57 1743.82   1 0.33456-0.15522-0.16179-0.33766-0.92838 0.92838
  -3  -4   070674.21 1811.03   1 0.57610-0.75537-0.48866-0.00985 0.65521-0.65521
   3  -4   074361.41 2004.47   1 0.38481-0.20551-0.14322-0.35547 0.91181-0.91181
  -3   4   081147.35 2229.87   1 0.54369-0.72293 0.47697 0.02162-0.69057 0.69057
   3   4   071531.01 1950.64   1 0.71929-0.54023 0.02327 0.47548-0.69430 0.69430
  -3   4  -140199.89 1015.18   1-0.18769 0.00402 0.30249 0.19625 0.93448-0.98054
  -3   4  -143236.25 1138.24   1 0.76824-0.95199 0.53602-0.03699-0.34997 0.30386
   3   4   143673.14 1325.11   1 0.58941-0.40574 0.14246 0.35698-0.79517 0.84139
  -3  -4  -140083.56 1100.47   1 0.60503-0.78886-0.56067 0.06215 0.56530-0.61141
   3  -4   142295.12 1256.98   1 0.33870-0.15482-0.07376-0.42493 0.93799-0.89188
  -3   4  -152056.42 1496.69   1 0.57042-0.75405 0.43059 0.06800-0.69943 0.65328
   3   4   148179.60 1385.63   1 0.70403-0.52057 0.09149 0.40726-0.70425 0.75042
  -3   4  -221692.02 1833.92   1 0.00740-0.19565 0.46047 0.03837 0.88764-0.97992
  -3   4  -222558.42 1836.96   1 0.76415-0.95223 0.50801-0.00885-0.39747 0.30523
   3   4   225768.00 2360.37   1 0.62616-0.43813 0.19753 0.30190-0.75425 0.84669
  -3  -4  -220603.41 1704.35   1 0.62353-0.81173-0.61733 0.11867 0.47969-0.57183
   3  -4   220772.75 1749.77   1 0.29173-0.10356-0.00647-0.49223 0.95647-0.86428
   3   4   223470.80 1967.16   1 0.68259-0.49474 0.16790 0.33084-0.71124 0.80359
  -3   4  -318320.37 1523.53   1 0.23734-0.43002 0.60753-0.10856 0.75800-0.89626
  -3   4  -319088.83 1551.67   1 0.75595-0.94842 0.47146 0.02770-0.45414 0.31578
   3   4   322908.54 2068.89   1 0.65788-0.46547 0.24933 0.24987-0.71064 0.84905
  -3  -4  -318640.29 1556.69   1 0.63407-0.82677-0.66166 0.16301 0.40018-0.53840
   3  -4   319363.81 1647.09   1 0.24545-0.05277 0.05742-0.55613 0.96770-0.82941
  -3   4  -320212.16 1716.84   1 0.61366-0.80606 0.34528 0.15332-0.71006 0.57161
   3   4   320187.63 1684.34   1 0.65353-0.46129 0.25199 0.24676-0.71372 0.85224
  -3   4  -450891.47 1723.50   1 0.46088-0.65806 0.70412-0.20493 0.54017-0.72454
  -3   4  -451752.74 1768.11   1 0.73985-0.93670 0.42002 0.07913-0.52554 0.34106
   3   4   457555.50 2230.09   1 0.68510-0.48832 0.29813 0.20107-0.66463 0.84918
  -3  -4  -463048.01 2237.01   1 0.63894-0.83613-0.69606 0.19740 0.32747-0.51177
   3  -4   466722.47 2411.33   1 0.20092-0.00374 0.11663-0.61534 0.97263-0.78824
  -3   4  -450035.97 1906.88   1 0.63062-0.82741 0.30736 0.19124-0.71263 0.52803
   3   4   453339.60 1923.45   1 0.61491-0.41812 0.34258 0.15601-0.71029 0.89489
  -3   4  -541083.71 1409.61   1 0.62751-0.82915 0.72639-0.22711 0.28029-0.51080
  -3   4  -545705.28 1576.90   1 0.70780-0.90896 0.34338 0.15582-0.61733 0.38664
   3   4   545195.62 1816.07   1 0.70783-0.50667 0.34344 0.15576-0.61726 0.84795
  -3   4  -544252.74 1670.71   1-0.15895-0.04224-0.16992 0.66852-0.97255 0.74249
  -3  -4  -550983.44 1874.14   1 0.63979-0.84147-0.72277 0.22412 0.26124-0.49161
   3   4   545524.67 1690.90   1 0.56638-0.36521 0.43787 0.06073-0.69819 0.92894
  -3   4  -545626.57 1763.19   1 0.64483-0.84600 0.27307 0.22552-0.71387 0.48312
  -3   4  -6 1581.01  160.67   1 0.71674-0.92242 0.69507-0.19596 0.05617-0.33276
   3   4   6 1675.51  703.78   1 0.72632-0.52069 0.38507 0.11408-0.56935 0.84608
  -3   4  -6 1871.70  204.00   1 0.64936-0.85489 0.23495 0.26425-0.72327 0.44645
  -3   4  -6 1694.16  385.60   1-0.12058-0.08507-0.21785 0.71645-0.96850 0.69243
  -3  -4  -6 7886.82  863.71   1 0.63798-0.84402-0.74339 0.24469 0.20086-0.47722
   3   4   6 1785.25  335.46   1 0.50624-0.30064 0.53526-0.03681-0.67617 0.95302
   3   4   733353.07 1383.56   1 0.74105-0.53104 0.42341 0.07574-0.52110 0.84395
  -3   4  -729171.69  901.44   1 0.55975-0.76955 0.10092 0.39852-0.82249 0.49895
  -3   4  -733476.83 1932.13   1-0.08596-0.12414-0.25993 0.75852-0.96179 0.63970
  -3  -4  -733581.90 1243.83   1 0.63391-0.84442-0.75961 0.26092 0.14539-0.46782
   3   4   730082.78 1021.44   1 0.43474-0.22475 0.63118-0.13274-0.64233 0.96533
  -3   4  -730192.44 1129.63   1 0.66657-0.87637 0.21633 0.28242-0.71335 0.39014
  -3   4  -832960.75 1954.69   1-0.05524-0.15931-0.29635 0.79494-0.95347 0.58538
  -3  -4  -827056.49 1384.78   1 0.62830-0.84330-0.77225 0.27355 0.09411-0.46260
   3   4   828825.08 1350.38   1 0.35136-0.13692 0.72210-0.22404-0.59591 0.96491
  -3   4  -831210.46 1659.34   1 0.67422-0.88841 0.19392 0.30482-0.71261 0.34322
   3   4   9 3137.36  710.42   1 0.76059-0.54180 0.49046 0.00869-0.42536 0.84045
  -3   4  -9 5841.56 1019.53   1-0.02839-0.19061-0.32749 0.82609-0.94442 0.53031
  -3  -4  -9 4886.80  728.35   1 0.62153-0.84100-0.78201 0.28332 0.04635-0.46090
   3   4   9 3809.82  629.64   1 0.25837-0.03954 0.80354-0.30548-0.53625 0.95137
  -3   4  -9 4953.13  719.82   1 0.68020-0.89878 0.17550 0.32324-0.71170 0.29614
   3   4  1017172.66 2096.82   1 0.76609-0.54291 0.51958-0.02042-0.37832 0.83953
  -3   4 -1014999.98 2229.79   1-0.00527-0.21765-0.35445 0.85212-0.93505 0.47592
  -3  -4 -10 9826.05 1173.23   1 0.61382-0.83778-0.78944 0.29074 0.00154-0.46215
   3   4  1012661.04 1574.15   1 0.15669 0.06687 0.87181-0.37350-0.46408 0.92521
  -3   4 -1014142.25 1578.94   1 0.68471-0.90768 0.16101 0.33774-0.71079 0.24906
   3   4  11 6079.90  951.02   1 0.76914-0.54138 0.54595-0.04693-0.33217 0.83946
  -3   4 -11 6761.41 1103.56   1 0.01436-0.24171-0.37645 0.87412-0.92632 0.42127
  -3  -4 -11 7104.56  999.65   1 0.60560-0.83394-0.79472 0.29583-0.04075-0.46585
  -3   4 -11 6466.41  825.90   1 0.68793-0.91528 0.15034 0.34841-0.71003 0.20212
   3   4  1220348.12 1668.31   1 0.77001-0.53784 0.57001-0.07099-0.28663 0.84005
  -3   4 -1222060.48 1888.56   1 0.03077-0.26253-0.39456 0.89224-0.91835 0.36739
  -3  -4 -1220885.85 1591.61   1 0.59647-0.82929-0.79853 0.29964-0.08098-0.47168
  -3   4 -1221979.97 1651.95   1 0.68997-0.92172 0.14340 0.35535-0.70948 0.15540
   3   4  1310763.19 1278.96   1 0.76890-0.53233 0.59183-0.09280-0.24189 0.84142
  -3   4 -13 9375.66 1794.35   1 0.04421-0.28039-0.40922 0.90690-0.91135 0.31448
  -3  -4 -1310555.37  992.59   1 0.58674-0.82405-0.80091 0.30202-0.11942-0.47928
  -3   4 -13 8756.93 1648.32   1 0.69094-0.92707 0.14007 0.35868-0.70921 0.10896
   3   4  1410919.70  981.82   1 0.76601-0.52504 0.61158-0.11255-0.19795 0.84359
  -3   4 -1410512.41 1920.17   1 0.05495-0.29555-0.42082 0.91850-0.90547 0.26268
  -3  -4 -1413777.19 1090.73   1 0.57648-0.81827-0.80200 0.30311-0.15635-0.48841
  -3   4 -1411661.56  907.38   1 0.69088-0.93141 0.14025 0.35850-0.70922 0.06280
   3   4  15  648.46  549.54   1 0.76149-0.51612 0.62942-0.13039-0.15476 0.84653
  -3   4 -15 1489.82  492.93   1 0.06323-0.30824-0.42969 0.92737-0.90075 0.21205
  -3  -4 -15  372.92  459.57   1 0.56571-0.81198-0.80193 0.30304-0.19198-0.49884
  -3   4 -15 1597.73  495.92   1 0.68983-0.93475 0.14386 0.35488-0.70952 0.01692
  -3  -5  14 2066.98  720.44   1-0.15111 0.03447 0.33433-0.95776 0.93025-0.28547
  -3   5  14 3438.06  952.71   1 0.70746-0.82507 0.70153-0.07764 0.08570 0.55966
   3  -5 -14 2176.75  649.77   1 0.63792-0.52147-0.74370 0.12033 0.19987-0.84473
  -3   5  14 1200.52  334.70   1-0.05005-0.06789 0.95425-0.33103-0.29475 0.94117
   3   5 -14 3589.72  989.45   1 0.74224-0.62480-0.15725 0.78076-0.65142 0.00510
  -3  -5  13 6589.90 1579.10   1-0.17019 0.04909 0.31786-0.94128 0.93273-0.33401
  -3   5  13 7759.00 1172.63   1 0.71605-0.83806 0.69559-0.07170 0.05844 0.54083
   3  -5 -13 8904.42 1166.93   1 0.63981-0.51887-0.72681 0.10344 0.24976-0.84856
  -3   5  13 5302.79 1220.60   1 0.00229-0.12462 0.94046-0.31724-0.33987 0.94011
   3   5 -13 9727.04 1406.71   1 0.74234-0.62050-0.15904 0.78255-0.65087 0.05072
  -3  -5  12 2889.04  640.37   1-0.19250 0.06692 0.29821-0.92164 0.93488-0.38221
  -3   5  12 3362.51  798.54   1 0.72402-0.85044 0.68907-0.06518 0.03115 0.52201
   3   5 -12 2401.11  544.84   1-0.08101 0.20655-0.26585 0.88909-0.96060 0.40845
   3  -5 -12 4130.71  943.74   1 0.63969-0.51437-0.70743 0.08412 0.30053-0.85342
  -3   5  12 2523.36  571.82   1 0.05401-0.18007 0.92184-0.29895-0.38377 0.93712
   3   5 -12 4795.22  979.66   1 0.74229-0.61606-0.15817 0.78168-0.65114 0.09715
  -3  -5  11 9379.11 1886.37   1-0.21800 0.08796 0.27524-0.89866 0.93633-0.42971
  -3   5  1111601.79 1114.13   1 0.73137-0.86220 0.68196-0.05807 0.00384 0.50322
   3   5 -11 6747.38 1533.25   1-0.10946 0.23945-0.23149 0.85473-0.96665 0.46052
   3  -5 -1113259.15 1195.30   1 0.63776-0.50795-0.68490 0.06158 0.35236-0.85917
  -3   5  11 8706.08 2133.62   1 0.10500-0.23549 0.89931-0.27642-0.42449 0.93173
   3   5 -1111716.94 1198.60   1 0.74208-0.61145-0.15447 0.77798-0.65226 0.14445
  -3  -5  10 2213.32  464.96   1-0.24660 0.11209 0.24880-0.87223 0.93663-0.47607
  -3   5  10 5165.22 1002.57   1 0.73812-0.87334 0.67425-0.05036-0.02350 0.48448
   3   5 -10 6121.83  962.00   1-0.14278 0.27722-0.19030 0.81354-0.97128 0.51116
   3  -5 -10 3300.18  749.43   1 0.63360-0.49930-0.65921 0.03589 0.40493-0.86568
  -3   5  10 4191.85  959.46   1 0.15489-0.28981 0.87285-0.24996-0.46273 0.92386
   3   5 -10 4571.67  897.36   1 0.74166-0.60664-0.14777 0.77128-0.65428 0.19263
  -3  -5   9 8364.09 1123.27   1-0.27809 0.13911 0.21884-0.84227 0.93529-0.52079
  -3   5   9 9503.01 1293.22   1 0.74425-0.88388 0.66595-0.04206-0.05093 0.46581
   3  -5  -9 9654.91 1405.97   1 0.62698-0.48819-0.63014 0.00683 0.45804-0.87270
  -3  -5   9 8645.50 1128.56   1 0.18124-0.31989 0.14214-0.76553 0.97311-0.55823
  -3   5   9 7535.59 1164.90   1 0.20336-0.34271 0.84280-0.21990-0.49832 0.91334
   3   5  -912297.99 1181.97   1 0.74099-0.60157-0.13785 0.76136-0.65720 0.24171
  -3   5   815215.91 1305.82   1 0.74977-0.89380 0.65702-0.03314-0.07844 0.44723
   3  -5  -813210.75 1642.75   1 0.61764-0.47483-0.59796-0.02518 0.51084-0.87971
  -3  -5   813920.82 1571.63   1 0.22456-0.36772 0.08546-0.70885 0.97070-0.60192
  -3   5   815881.72 2230.76   1 0.25020-0.39435 0.80979-0.18722-0.53068 0.89968
   3   5  -816708.77 1496.92   1 0.73996-0.59614-0.12450 0.74801-0.66102 0.29170
  -3   5   725341.36 1932.52   1 0.75467-0.90310 0.64747-0.02358-0.10608 0.42876
   3   5  -727629.39 2050.24   1 0.34732-0.19881-0.14865 0.77297-0.92588 0.60247
   3  -5  -721350.00 1715.59   1 0.60536-0.45800-0.56158-0.06156 0.56405-0.88681
  -3  -5   720567.19 1501.54   1 0.27221-0.41986 0.02079-0.64418 0.96201-0.63932
  -3   5   727213.09 3382.21   1 0.29494-0.44349 0.77381-0.15124-0.56054 0.88342
   3   5  -726740.96 2150.85   1 0.73844-0.59022-0.10744 0.73095-0.66569 0.34254
  -3   5   612884.73 1480.96   1 0.75873-0.91168 0.63747-0.01369-0.13396 0.41067
   3   5  -612773.08 1454.98   1 0.38499-0.23208-0.10879 0.73312-0.91648 0.63927
   3  -5  -616258.69 1823.05   1 0.58992-0.43799-0.52140-0.10174 0.61654-0.89319
  -3  -5   615371.10 1671.98   1 0.32303-0.47519-0.05119-0.57219 0.94500-0.66841
  -3   5   613568.33 1679.17   1 0.33741-0.49034 0.73559-0.11301-0.58741 0.86416
   3   5  -613359.95 1584.13   1 0.73625-0.58363-0.08641 0.70992-0.67116 0.39417
  -3   5   517308.33 1175.52   1 0.76236-0.91971 0.62654-0.00276-0.16199 0.39258
   3   5  -519712.99 1374.49   1 0.42352-0.26621-0.06628 0.69061-0.90345 0.67244
   3  -5  -512776.24 1589.86   1 0.57115-0.41467-0.47746-0.14568 0.66768-0.89823
  -3  -5   513860.78 1658.74   1 0.37529-0.53172-0.12861-0.49476 0.91793-0.68736
  -3   5   517806.49 2266.35   1 0.37735-0.53468 0.69567-0.07310-0.61126 0.84188
   3   5  -522559.63 1578.18   1 0.73315-0.57614-0.06111 0.68462-0.67730 0.44648
  -3   5   433661.31 2073.48   1 0.76533-0.92708 0.61486 0.00891-0.19027 0.37474
   3   5  -436119.46 2258.43   1 0.46218-0.30046-0.02168 0.64600-0.88651 0.70171
   3  -5  -446003.20 2866.30   1 0.54885-0.38781-0.43004-0.19318 0.71681-0.90126
  -3  -5   445852.03 2729.97   1 0.42682-0.58782-0.20971-0.41366 0.87968-0.69522
  -3   5   438284.39 2413.44   1 0.41493-0.57659 0.65467-0.03161-0.63184 0.81641
   3   5  -437371.40 2402.50   1 0.72886-0.56745-0.03124 0.65475-0.68394 0.49928
  -3   5   3 8726.64  977.93   1 0.76761-0.93376 0.60237 0.02140-0.21889 0.35724
   3   5  -3 7784.44  891.80   1 0.50072-0.33447 0.02417 0.60013-0.86526 0.72661
   3  -5  -3 9651.75 1141.46   1 0.52332-0.35771-0.37929-0.24394 0.76306-0.90140
  -3  -5   311139.14 1130.85   1 0.47488-0.64049-0.29079-0.33244 0.83061-0.69227
  -3   5   3 7432.23  853.87   1 0.44929-0.61535 0.61314 0.00991-0.64975 0.78818
   3   5  -3 7281.75  927.44   1 0.72300-0.55720 0.00346 0.62004-0.69082 0.55233
  -3   5   2 4531.91  555.97   1 0.76916-0.93971 0.58899 0.03479-0.24793 0.34017
   3   5  -2 5673.52  673.29   1 0.53740-0.36680 0.07102 0.55327-0.84032 0.74789
  -3  -5   2 4976.27  560.72   1 0.51787-0.68806-0.36887-0.25435 0.77184-0.67961
   3  -5  -2 4416.09  585.93   1 0.49462-0.32443-0.32584-0.29739 0.80571-0.89794
  -3   5   2 5641.81  875.01   1 0.48073-0.65118 0.57167 0.05138-0.66489 0.75717
   3   5  -2 5413.01  713.95   1 0.71522-0.54494 0.04313 0.58030-0.69756 0.60521
  -3   5   159391.87 2701.93   1 0.76994-0.94489 0.57459 0.04918-0.27753 0.32365
   3   5  -160272.23 2835.28   1 0.57211-0.39715 0.11795 0.50634-0.81164 0.76542
  -3  -5   167415.79 3039.85   1 0.55410-0.72886-0.44096-0.18227 0.70605-0.65994
   3  -5  -172644.57 3352.73   1 0.46328-0.28855-0.27045-0.35292 0.84393-0.89004
  -3   5   166699.71 3132.91   1 0.50921-0.68406 0.53083 0.09221-0.67742 0.72356
   3   5  -160306.95 2859.01   1 0.70482-0.53015 0.08829 0.53514-0.70386 0.65768
  -3   5   0 6769.26  738.28   1 0.76986-0.94922 0.55903 0.06474-0.30787 0.30787
   3   5   0 7319.01  975.92   1 0.60435-0.42503 0.16431 0.45998-0.77958 0.77958
  -3  -5   0 4168.04  474.22   1 0.58318-0.76245-0.50513-0.11801 0.63618-0.63618
   3  -5   0 4885.99  610.15   1 0.42943-0.25013-0.21395-0.40942 0.87738-0.87738
  -3   5   0 6591.65  812.16   1 0.53478-0.71402 0.49115 0.13190-0.68758 0.68758
   3   5   0 6284.14  808.89   1 0.69128-0.51221 0.13888 0.48455-0.70911 0.70911
  -3   5  -118643.57 1819.67   1 0.76882-0.95258 0.54206 0.08171-0.33921 0.29309
   3   5   118627.20 1893.47   1 0.63360-0.44994 0.20932 0.41469-0.74479 0.79093
  -3  -5  -115368.03 1526.05   1 0.60504-0.78887-0.56071-0.06243 0.56525-0.61136
   3  -5   117392.81 1775.66   1 0.39390-0.21002-0.15733-0.46604 0.90558-0.85947
  -3   5  -116775.37 1724.48   1 0.55769-0.74132 0.45321 0.17004-0.69540 0.64925
   3   5   118147.99 1880.18   1 0.67390-0.49044 0.19490 0.42854-0.71265 0.75882
  -3   5  -2 7888.49  793.23   1 0.76662-0.95470 0.52320 0.10075-0.37222 0.27997
   3   5   210181.24 1183.35   1 0.65996-0.47192 0.25290 0.37111-0.70744 0.79972
  -3  -5  -210012.72 1017.71   1 0.62063-0.80902-0.60780-0.01534 0.49535-0.58757
   3  -5   211777.12 1247.55   1 0.35743-0.16898-0.10158-0.52179 0.92839-0.83616
  -3   5  -2 8663.42  987.93   1 0.57770-0.76572 0.41720 0.20605-0.70157 0.60927
   3   5   2 8040.71  915.47   1 0.65194-0.46409 0.25614 0.36730-0.71369 0.80604
  -3   5  -310079.75 1201.93   1 0.76304-0.95550 0.50212 0.12183-0.40698 0.26862
   3   5   312478.13 1562.89   1 0.68320-0.49079 0.29456 0.32945-0.66817 0.80658
  -3  -5  -3 8071.56  996.15   1 0.63100-0.82369-0.64681 0.02350 0.42832-0.56654
   3  -5   3 7950.57 1011.78   1 0.32071-0.12803-0.04783-0.57555 0.94596-0.80767
   3   5   311876.65 1478.96   1 0.62417-0.43177 0.32213 0.30112-0.71178 0.85023
   3   5   4 6774.17  955.43   1 0.70335-0.50656 0.33408 0.28993-0.62744 0.81199
  -3  -5  -4 5126.38  683.51   1 0.63701-0.83420-0.67932 0.05600 0.36430-0.54860
   3  -5   4 5221.95  774.72   1 0.28467-0.08749 0.00343-0.62683 0.95861-0.77422
   3   5   4 7213.21 1010.00   1 0.59071-0.39392 0.39234 0.23090-0.70506 0.88966
  -3   5  -4 6509.59  877.56   1 0.61024-0.80702 0.35259 0.27066-0.70942 0.52482
   3   5   529466.72 1961.21   1 0.72048-0.51931 0.37132 0.25269-0.58568 0.81636
  -3  -5  -543911.10 2657.38   1 0.63963-0.84130-0.70609 0.08277 0.30381-0.53418
   3  -5   544053.32 2683.21   1 0.24988-0.04820 0.05141-0.67480 0.96690-0.73642
   3   5   528379.56 1759.66   1 0.55041-0.34924 0.46569 0.15756-0.69294 0.92368
  -3   5  -530793.91 2036.81   1 0.62313-0.82430 0.32447 0.29878-0.71163 0.48088
   3   5   6 1132.05  456.78   1 0.73469-0.52906 0.40610 0.21784-0.54341 0.82014
  -3  -5  -6  373.10  293.16   1 0.63974-0.84578-0.72787 0.10450 0.24681-0.52318
   3  -5   6 1011.80  505.30   1 0.21690-0.01072 0.09562-0.71901 0.97149-0.69491
   3   5   6 1320.38  399.59   1 0.50241-0.29681 0.54090 0.08215-0.67454 0.95139
  -3   5  -6 2324.62  630.40   1 0.63402-0.83958 0.29937 0.32388-0.71301 0.43611
   3   5   729571.59 2339.12   1 0.74625-0.53624 0.43870 0.18524-0.50063 0.82348
  -3  -5  -723157.54 1731.76   1 0.63754-0.84806-0.74581 0.12244 0.19312-0.51555
   3  -5   723951.62 1819.60   1 0.18616 0.02451 0.13580-0.75919 0.97308-0.65040
   3   5   724598.46 1836.15   1 0.44684-0.23685 0.61623 0.00682-0.64852 0.97152
  -3   5  -724467.38 1881.98   1 0.64310-0.85305 0.27737 0.34588-0.71377 0.39072
   3   5   8 2257.59  739.61   1 0.75531-0.54091 0.46903 0.15491-0.45772 0.82668
  -3   5  -8 2006.86  458.64   1-0.15777-0.05678-0.17142 0.79466-0.97248 0.60438
  -3  -5  -8 4569.56  726.68   1 0.63363-0.84863-0.76040 0.13703 0.14243-0.51092
   3   5   8 2493.96  463.16   1 0.38329-0.16891 0.68978-0.06672-0.61423 0.98337
  -3   5  -8 2016.13  428.72   1 0.65054-0.86487 0.25853 0.36472-0.71410 0.34490
   3   5   9 7950.35 1438.61   1 0.76204-0.54325 0.49718 0.12677-0.41485 0.82994
  -3   5  -9 5631.57 1000.10   1-0.13228-0.08672-0.20339 0.82663-0.97011 0.55601
  -3  -5  -9 5125.54  862.95   1 0.62834-0.84782-0.77218 0.14881 0.09441-0.50897
   3   5   9 4006.67  873.53   1 0.31137-0.09254 0.75951-0.13694-0.57112 0.98624
  -3   5  -9 7215.93 1229.81   1 0.65688-0.87546 0.24309 0.38034-0.71372 0.29816
   3   5  1013986.34 1470.11   1 0.76662-0.54345 0.52323 0.10072-0.37216 0.83337
  -3   5 -1012336.81 1997.54   1-0.10953-0.11392-0.23140 0.85464-0.96667 0.50655
  -3  -5 -1014388.17 1295.15   1 0.62191-0.84586-0.78156 0.15819 0.04877-0.50939
  -3   5 -1013005.74 1198.34   1 0.66147-0.88444 0.23062 0.39282-0.71362 0.25189
   3   5  1114761.87 1146.71   1 0.76924-0.54147 0.54719 0.07659-0.32992 0.83722
  -3   5 -1113466.06 2080.41   1-0.08951-0.13839-0.25566 0.87890-0.96261 0.45648
  -3  -5 -1111371.98  920.96   1 0.61450-0.84294-0.78889 0.16552 0.00523-0.51190
  -3   5 -1115788.34 1148.09   1 0.66483-0.89218 0.22127 0.40217-0.71346 0.20556
   3   5  12 1565.40  726.35   1 0.77001-0.53784 0.56938 0.05439-0.28787 0.84128
  -3   5 -12 1798.03  488.70   1-0.07216-0.16019-0.27639 0.89963-0.95833 0.40618
  -3  -5 -12  435.06  386.38   1 0.60650-0.83932-0.79424 0.17062-0.03651-0.51615
  -3   5 -12 1387.39  545.51   1 0.66703-0.89878 0.21500 0.40843-0.71332 0.15924
  -3   5 -13 1133.76  342.64   1-0.05736-0.17944-0.29386 0.91710-0.95412 0.35596
  -3  -5 -13 3090.50  785.82   1 0.59751-0.83481-0.79819 0.17457-0.07660-0.52211
  -3   5 -13 3029.98  716.34   1 0.66816-0.90430 0.21177 0.41166-0.71323 0.11298
  -3   6  11 2710.02  758.52   1 0.73119-0.86201 0.68215 0.06650 0.00457 0.50250
   3  -6 -11 2730.20  805.53   1 0.63776-0.50796-0.68495-0.06302 0.35225-0.85907
  -3   6  11 2684.40  696.65   1 0.13446-0.26495 0.88423-0.13675-0.44727 0.95451
   3   6 -11 2818.10  887.61   1 0.72919-0.59856-0.03336 0.78157-0.68349 0.17567
  -3   6  10 2629.23  677.55   1 0.73762-0.87284 0.67487 0.07379-0.02139 0.48237
   3  -6 -10 2871.23  766.71   1 0.63398-0.49968-0.66119-0.08679 0.40110-0.86184
  -3   6  10 2167.78  649.63   1 0.18018-0.31510 0.85772-0.11024-0.48150 0.94263
   3   6 -10 3686.45 1073.36   1 0.72794-0.59292-0.02540 0.77361-0.68516 0.22351
  -3   6   9 3000.50  804.06   1 0.74345-0.88308 0.66711 0.08154-0.04719 0.46207
   3   6  -9  906.01  317.36   1 0.41343-0.27373-0.07760 0.82679-0.90722 0.49140
   3  -6  -9 1597.56  513.92   1 0.62814-0.48935-0.63474-0.11323 0.45003-0.86470
  -3   6   9 1366.10  363.79   1 0.22424-0.36400 0.82877-0.08168-0.51268 0.92780
   3   6  -9 2391.56  856.29   1 0.72616-0.58674-0.01455 0.76276-0.68736 0.27187
  -3   6   8  976.15  360.59   1 0.74868-0.89272 0.65891 0.08975-0.07279 0.44157
   3   6  -8 2957.43  568.42   1 0.44011-0.29600-0.04740 0.79659-0.89669 0.52707
   3  -6  -8 5104.70  845.54   1 0.62007-0.47726-0.60592-0.14185 0.49835-0.86723
  -3   6   8 2718.44  531.09   1 0.26620-0.41035 0.79741-0.05032-0.54153 0.91053
   3   6  -8 1472.75  547.64   1 0.72375-0.57993-0.00065 0.74886-0.69005 0.32073
  -3   6   7 4669.41  970.89   1 0.75333-0.90177 0.65026 0.09839-0.09817 0.42086
   3   6  -7 4729.66  986.11   1 0.46774-0.31923-0.01509 0.76428-0.88373 0.56032
   3  -6  -7 5505.10 1152.83   1 0.60971-0.46235-0.57388-0.17389 0.54671-0.86947
  -3   6   7 4594.77  982.80   1 0.30599-0.45454 0.76426-0.01717-0.56768 0.89055
   3   6  -7 4848.84 1065.54   1 0.72066-0.57232 0.01626 0.73186-0.69309 0.36988
  -3   6   6  588.85  340.20   1 0.75739-0.91023 0.64120 0.10746-0.12331 0.39990
   3   6  -6  374.68  305.65   1 0.49640-0.34322 0.01881 0.73035-0.86788 0.59057
   3  -6  -6 1121.90  558.19   1 0.59692-0.44500-0.53906-0.20871 0.59421-0.87086
  -3   6   6  313.98  222.95   1 0.34350-0.49644 0.72976 0.01732-0.59114 0.86789
   3   6  -6 1135.50  554.12   1 0.71657-0.56384 0.03673 0.71140-0.69654 0.41950
  -3   6   5 2481.88  519.62   1 0.76068-0.91803 0.63193 0.11660-0.14837 0.37896
   3   6  -5 2907.61  621.64   1 0.52461-0.36708 0.05439 0.69476-0.84959 0.61850
   3  -6  -5 3327.24  734.89   1 0.58165-0.42517-0.50153-0.24624 0.64042-0.87096
  -3   6   5 3519.03  773.68   1 0.37860-0.53593 0.69435 0.05273-0.61198 0.84261
   3   6  -5 2898.80  725.95   1 0.71136-0.55425 0.06071 0.68741-0.70019 0.46932
  -3   6   423204.52 1705.81   1 0.76359-0.92534 0.62210 0.12643-0.17294 0.35741
   3   6  -425183.63 1851.54   1 0.55245-0.39056 0.09103 0.65813-0.82855 0.64368
   3  -6  -419732.42 1506.05   1 0.56388-0.40285-0.46146-0.28631 0.68489-0.86933
  -3   6   423403.33 1727.82   1 0.41152-0.57319 0.65859 0.08907-0.62999 0.81456
   3   6  -423309.08 1769.60   1 0.70480-0.54330 0.08837 0.65975-0.70387 0.51917
  -3   6   3  775.14  290.10   1 0.76594-0.93209 0.61194 0.13659-0.19711 0.33546
   3   6  -3 3099.08  604.61   1 0.57949-0.41324 0.12830 0.62085-0.80481 0.66615
   3  -6  -3 2190.18  510.92   1 0.54355-0.37794-0.41921-0.32866 0.72718-0.86552
  -3  -6   3 2231.46  395.90   1 0.52369-0.68930-0.38000-0.36787 0.76245-0.62411
  -3   6   3 2310.77  509.23   1 0.44161-0.60767 0.62275 0.12491-0.64587 0.78429
   3   6  -3 2672.96  659.80   1 0.69661-0.53072 0.11984 0.62829-0.70736 0.56884
  -3   6   228074.28 1984.10   1 0.76773-0.93829 0.60151 0.14702-0.22080 0.31303
   3   6  -230494.22 2208.63   1 0.60535-0.43474 0.16580 0.58336-0.77849 0.68606
  -3  -6   231969.55 2190.96   1 0.55226-0.72245-0.43712-0.31075 0.70987-0.61764
   3  -6  -236532.19 2606.46   1 0.52107-0.35088-0.37496-0.37291 0.76673-0.85896
  -3   6   231077.06 2246.02   1 0.46918-0.63963 0.58732 0.16034-0.65948 0.75176
   3   6  -230376.75 2203.27   1 0.68647-0.51619 0.15520 0.59292-0.71039 0.61804
  -3   6   1  984.12  402.28   1 0.76899-0.94395 0.59089 0.15764-0.24389 0.29001
   3   6  -1  618.83  381.84   1 0.62971-0.45475 0.20311 0.54604-0.74979 0.70358
  -3  -6   1  370.31  277.90   1 0.57676-0.75148-0.49018-0.25759 0.65349-0.60738
   3  -6  -1  435.58  385.74   1 0.49651-0.32175-0.32927-0.41860 0.80314-0.84926
  -3   6   1 1147.65  443.02   1 0.49425-0.66910 0.55269 0.19497-0.67099 0.71713
   3   6  -1 1019.44  363.88   1 0.67402-0.49934 0.19452 0.55360-0.71263 0.66646
   3   6   0 8483.83 1362.76   1 0.65220-0.47291 0.23971 0.50910-0.71914 0.71914
  -3  -6   0 6745.02 1018.01   1 0.59668-0.77595-0.53842-0.20935 0.59503-0.59503
   3  -6   0 7794.35 1263.17   1 0.47021-0.29087-0.28268-0.46519 0.83605-0.83605
  -3   6   0 7809.47 1243.92   1 0.51689-0.69613 0.51923 0.22843-0.68059 0.68059
   3   6   0 8467.48 1350.58   1 0.65885-0.47978 0.23780 0.51033-0.71369 0.71369
   3   6   1 6376.08 1056.67   1 0.67288-0.48921 0.27561 0.47320-0.68648 0.73262
  -3  -6  -1 6168.01  947.54   1 0.61229-0.79612-0.58146-0.16631 0.53571-0.58182
   3  -6   1 7018.14 1146.83   1 0.44276-0.25888-0.23588-0.51216 0.86505-0.81893
  -3   6  -1 5838.13 1062.01   1 0.53735-0.72098 0.48738 0.26052-0.68826 0.64211
   3   6   1 4981.59  851.97   1 0.64009-0.45646 0.28479 0.46311-0.71356 0.75971
   3   6   210007.92 1572.47   1 0.69152-0.50348 0.31042 0.43839-0.65224 0.74452
  -3  -6  -2 7413.30 1123.29   1 0.62402-0.81222-0.61909-0.12888 0.47677-0.56892
   3  -6   2 7030.74 1096.04   1 0.41418-0.22572-0.18934-0.55870 0.89028-0.79805
  -3   6  -2 9613.22 1526.95   1 0.55539-0.74341 0.45717 0.29072-0.69463 0.60233
   3   6   211995.16 1024.59   1 0.61811-0.43009 0.33561 0.41228-0.71084 0.80314
   3   6   3 3194.21  731.21   1 0.70807-0.51566 0.34396 0.40485-0.61669 0.75510
  -3  -6  -3 2480.40  463.91   1 0.63210-0.82479-0.65184-0.09613 0.41897-0.55720
   3  -6   3 3942.41  700.52   1 0.38515-0.19212-0.14375-0.60430 0.91158-0.77324
  -3   6  -3 2796.28  513.41   1 0.57131-0.76372 0.42896 0.31894-0.69970 0.56125
   3   6   3 3723.04  688.39   1 0.59201-0.39961 0.38979 0.35811-0.70539 0.84384
   3   6   4 2591.80  743.82   1 0.72253-0.52574 0.37609 0.37272-0.58008 0.76463
  -3  -6  -4 4508.61  820.15   1 0.63711-0.83430-0.68003-0.06794 0.36280-0.54710
   3  -6   4 3894.97  740.93   1 0.35617-0.15856-0.09968-0.64836 0.92908-0.74463
   3   6   4 2321.02  494.57   1 0.56132-0.36453 0.44686 0.30104-0.69658 0.88118
  -3   6  -4 2477.25  618.79   1 0.58524-0.78203 0.40293 0.34496-0.70365 0.51905
   3   6   516812.66 1573.28   1 0.73487-0.53363 0.40659 0.34215-0.54280 0.77340
  -3  -6  -513129.46 1119.19   1 0.63952-0.84120-0.70412-0.04385 0.30856-0.53893
   3  -6   511680.02 2196.92   1 0.32761-0.12593-0.05784-0.69022 0.94303-0.71255
   3   6   514279.15 1258.81   1 0.52533-0.32412 0.50618 0.24148-0.68396 0.91467
  -3   6  -513183.63 1273.56   1 0.59731-0.79849 0.37924 0.36865-0.70666 0.47591
   3   6   6 3116.15  844.26   1 0.74524-0.53962 0.43564 0.31310-0.50479 0.78152
  -3  -6  -6 5317.10 1054.88   1 0.63973-0.84590-0.72457-0.02340 0.25638-0.53282
   3  -6   6 5463.75 1080.72   1 0.30006-0.09387-0.01824-0.72982 0.95374-0.67715
   3   6   6 3657.83  756.14   1 0.48410-0.27850 0.56701 0.18066-0.66643 0.94328
  -3   6  -6 3966.01  877.95   1 0.60766-0.81322 0.35801 0.38989-0.70891 0.43201
   3   6   710895.34 1053.62   1 0.75368-0.54366 0.46311 0.28563-0.46635 0.78920
  -3  -6  -712502.98  866.81   1 0.63826-0.84878-0.74166-0.00637 0.20626-0.52869
   3  -6   711349.05  858.31   1 0.27378-0.06310 0.01860-0.76667 0.96161-0.63892
   3   6   711860.25  885.45   1 0.43707-0.22708 0.62834 0.11932-0.64354 0.96653
  -3   6  -711158.37  871.13   1 0.61642-0.82636 0.33931 0.40859-0.71055 0.38750
   3   6   814892.34 1398.26   1 0.76026-0.54586 0.48900 0.25973-0.42762 0.79659
   3  -6   817689.67 1526.13   1 0.24908-0.03389 0.05250-0.80057 0.96705-0.59827
   3   6   812408.44 1584.97   1 0.38398-0.16960 0.68904 0.05862-0.61463 0.98376
  -3   6  -815964.11 1415.02   1 0.62370-0.83803 0.32319 0.42471-0.71171 0.34251
   3   6   9 4086.96  972.63   1 0.76508-0.54630 0.51334 0.23540-0.38873 0.80382
  -3  -6  -9 2749.80  699.96   1 0.63045-0.84993-0.76811 0.02006 0.11195-0.52651
   3  -6   9 5336.22 1188.94   1 0.22616-0.00647 0.08333-0.83139 0.97051-0.55563
  -3   6  -9 4930.25 1074.65   1 0.62961-0.84833 0.30969 0.43821-0.71251 0.29716
   3   6  10 4848.77  887.85   1 0.76824-0.54487 0.53603 0.21250-0.34996 0.81114
  -3  -6 -10 2906.58  729.55   1 0.62470-0.84866-0.77793 0.02989 0.06746-0.52808
   3  -6  10 3024.83  757.61   1 0.20519 0.01899 0.11104-0.85911 0.97240-0.51142
  -3   6 -10 4666.29  733.93   1 0.63425-0.85735 0.29883 0.44907-0.71303 0.25153
   3  -7  -5 3434.83  839.19   1 0.59460-0.43812-0.53310-0.33930 0.60187-0.83241
  -3   7   5 1381.37  463.75   1 0.36664-0.52397 0.70677 0.16482-0.60501 0.83563
   3   7  -5 1382.21  637.99   1 0.68188-0.52477 0.17017 0.70264-0.71138 0.48052
   3   7  -4 9802.35 1227.52   1 0.62515-0.46326 0.19596 0.67806-0.75550 0.57062
   3  -7  -4 9911.73  727.78   1 0.58070-0.41966-0.49931-0.37309 0.64301-0.82745
  -3   7   410956.98  843.09   1 0.39634-0.55801 0.67563 0.19664-0.62162 0.80619
   3   7  -410427.11  856.22   1 0.67372-0.51222 0.19542 0.67739-0.71267 0.52797
   3   7  -3 1481.64  521.21   1 0.64349-0.47732 0.22528 0.64834-0.73154 0.59313
   3  -7  -3 1263.95  427.53   1 0.56498-0.39938-0.46384-0.40856 0.68238-0.82070
  -3   7   3 2409.07  718.93   1 0.42357-0.58963 0.64457 0.22770-0.63647 0.77490
   3   7  -3 1043.07  468.61   1 0.66395-0.49805 0.22373 0.64908-0.71351 0.57499
   3   7  -2 4021.27  954.21   1 0.66103-0.49049 0.25474 0.61888-0.70579 0.61351
   3  -7  -2 3641.29  914.11   1 0.54739-0.37720-0.42704-0.44548 0.71971-0.81194
  -3   7   2 2753.23  683.30   1 0.44858-0.61904 0.61404 0.25824-0.64940 0.74168
   3   7  -2 2615.67  656.47   1 0.65233-0.48204 0.25512 0.61769-0.71370 0.62135
   3   7  -117452.22 1141.72   1 0.67753-0.50261 0.28405 0.58956-0.67842 0.63228
   3  -7  -114218.60  886.47   1 0.52836-0.35360-0.38903-0.48349 0.75463-0.80075
  -3   7   116086.43 1217.93   1 0.47142-0.64627 0.58432 0.28795-0.66054 0.70668
   3   7  -115917.93 1038.95   1 0.63819-0.46333 0.28939 0.58316-0.71340 0.66725
   3   7   0  580.44  381.40   1 0.69285-0.51356 0.31301 0.56060-0.64959 0.64959
   3  -7   0 -452.45  340.61   1 0.50796-0.32862-0.35028-0.52224 0.78693-0.78693
  -3   7   0  449.02  412.77   1 0.49216-0.67140 0.55568 0.31659-0.67006 0.67006
   3   7   0  436.54  562.06   1 0.62204-0.44280 0.32690 0.54565-0.71146 0.71146
   3   7   1 1048.32  484.99   1 0.70688-0.52321 0.34143 0.53218-0.61946 0.66560
   3  -7   1  699.28  472.36   1 0.48645-0.30253-0.31118-0.56134 0.81641-0.77030
  -3   7  -1 -115.38  430.30   1 0.51086-0.69450 0.52836 0.34391-0.67811 0.63197
   3   7   2 5280.96  677.50   1 0.71954-0.53150 0.36917 0.50445-0.58819 0.68046
   3  -7   2 5895.53  633.36   1 0.46433-0.27588-0.27225-0.60047 0.84277-0.75054
  -3   7  -2 7263.77  915.32   1 0.52763-0.71565 0.50256 0.36971-0.68485 0.59257
   3   7   2 3813.70  863.19   1 0.58128-0.39326 0.41048 0.46207-0.70257 0.79487
   3   7   3 2274.24  701.43   1 0.73075-0.53828 0.39599 0.47754-0.55604 0.69440
   3  -7   3  839.82  352.68   1 0.44145-0.24842-0.23371-0.63901 0.86631-0.72796
   3   7   3 1401.63  532.12   1 0.55600-0.36360 0.45612 0.41643-0.69484 0.83329
  -3   7  -3 2215.56  773.71   1 0.54269-0.73510 0.47862 0.39393-0.69021 0.55176
   3   7   4 1189.30  593.05   1 0.74055-0.54369 0.42199 0.45154-0.52297 0.70746
   3  -7   4  -38.04  334.38   1 0.41837-0.22076-0.19605-0.67667 0.88686-0.70240
  -3   7  -4  916.78  488.66   1 0.55586-0.75265 0.45637 0.41618-0.69479 0.51019
   3   7   4  905.70  350.63   1 0.52682-0.33000 0.50384 0.36843-0.68454 0.86910
  -4   0  1920981.10 1256.18   1 0.46623-0.62038 0.70569-0.70569 0.53350 0.34222
   4   0 -1921675.45 1427.44   1 0.50125-0.34732-0.78573 0.78573-0.36243-0.51184
   4   0 -1919626.56 1278.24   1 0.62229-0.46856-0.70416 0.70416-0.34190-0.53347
  -4   0  1835208.77 2165.69   1 0.47607-0.63469 0.70845-0.70845 0.52100 0.30863
   4   0 -1836410.50 2255.54   1 0.51474-0.35635-0.79093 0.79093-0.33084-0.49742
   4   0 -1833553.37 2088.65   1 0.60417-0.44597-0.73216 0.73216-0.31448-0.51481
  -4   0  17 2038.23  623.71   1 0.48480-0.64789 0.71078-0.71078 0.50965 0.27389
   4   0 -17 1383.85  485.24   1 0.52787-0.36502-0.79525 0.79525-0.29818-0.48406
   4   0 -17 2599.31  828.96   1 0.58526-0.42259-0.75836 0.75836-0.28695-0.49627
  -4   0  1626789.44 1975.61   1 0.49237-0.65992 0.71269-0.71269 0.49963 0.23781
   4   0 -1625705.68 1957.97   1 0.54065-0.37335-0.79865 0.79865-0.26426-0.47196
   4   0 -1628066.25 2060.97   1 0.56557-0.39843-0.78287 0.78287-0.25929-0.47786
  -4   0  1512979.36 1566.79   1 0.49865-0.67068 0.71421-0.71421 0.49116 0.20020
   4   0 -1515488.73 1775.86   1 0.55350-0.38197-0.80066 0.80066-0.22927-0.46155
   4   0 -1514007.12 1727.21   1 0.54512-0.37351-0.80576 0.80576-0.23148-0.45960
  -4   0  14 5513.65  928.10   1 0.50353-0.68002 0.71534-0.71534 0.48450 0.16077
   4   0 -14 6134.37 1000.05   1 0.56572-0.38971-0.80193 0.80193-0.19198-0.45279
   4   0 -14 5952.87  881.38   1 0.52392-0.34783-0.82709 0.82709-0.20351-0.44149
  -4   0  13120099.4 3834.46   1 0.50680-0.68776 0.71607-0.71607 0.47998 0.11919
   4   0 -13121901.0 3928.43   1 0.57762-0.39713-0.80194 0.80194-0.15243-0.44628
   4   0 -13120982.2 3879.54   1 0.50201-0.32144-0.84688 0.84688-0.17539-0.42361
  -4   0  12104406.0 3735.95   1 0.50821-0.69365 0.71638-0.71638 0.47802 0.07507
   4   0 -12104017.8 3790.86   1 0.58920-0.40423-0.80045 0.80045-0.11008-0.44257
   4   0 -12103919.3 3769.72   1 0.47928-0.29424-0.86525 0.86525-0.14703-0.40590
  -4   0  1133345.96 1343.91   1 0.50742-0.69732 0.71621-0.71621 0.47912 0.02787
   4   0 -1134431.14 1387.52   1 0.60040-0.41095-0.79711 0.79711-0.06419-0.44241
   4   0 -1136629.70 1632.64   1 0.45577-0.26624-0.88218 0.88218-0.11843-0.38841
  -4   0  10140156.9 3580.32   1 0.50392-0.69830 0.71543-0.71543 0.48395-0.02304
   4   0 -10142051.1 3655.33   1 0.61114-0.41720-0.79140 0.79140-0.01376-0.44678
   4   0 -10138624.5 3642.22   1 0.43144-0.23743-0.89768 0.89768-0.08957-0.37120
  -4   0   9 4837.09  549.30   1 0.49705-0.69590 0.71383-0.71383 0.49333-0.07851
   4   0  -9 4622.61  539.61   1 0.62093-0.42236-0.78270 0.78270 0.04259-0.45714
   4   0  -9 5224.12  768.61   1 0.40625-0.20777-0.91175 0.91175-0.06040-0.35429
  -4   0   824059.99 2123.28   1 0.48584-0.68915 0.71104-0.71104 0.50830-0.13957
   4   0  -829680.09 2284.12   1 0.62986-0.42681-0.76931 0.76931 0.10688-0.47537
   4   0  -827914.17 2522.81   1 0.38015-0.17719-0.92440 0.92440-0.03087-0.33775
  -4   0   7161719.8 1665.58   1 0.46887-0.67665 0.70644-0.70644 0.53018-0.20754
   4   0  -7155893.8 1581.51   1 0.63682-0.42929-0.74924 0.74924 0.18188-0.50431
   4   0  -7156691.2 1839.47   1 0.35327-0.14586-0.93551 0.93551-0.00084-0.32175
  -4   0   6261386.5 2339.81   1 0.44410-0.65635 0.69891-0.69891 0.56061-0.28410
  -4   0   6239212.1 2054.27   1 0.57463-0.78631-0.48531 0.48531 0.65898-0.38233
   4   0  -5 4977.03  519.27   1 0.63581-0.41931-0.67147 0.67147 0.38060-0.61098
  -4   0   5 4810.81  466.59   1 0.54381-0.76005-0.41972 0.41972 0.72670-0.49613
  -4   0   431316.45 1390.96   1 0.35776-0.57894 0.66641-0.66641 0.65413-0.46978
   4   0  -428270.33 1252.21   1 0.54328-0.32209 0.72289-0.72289 0.42692-0.61129
   4   0  -432334.74 1441.30   1 0.61695-0.39616-0.59578 0.59578 0.51420-0.69863
  -4   0   430538.28 1332.82   1 0.49033-0.71115-0.31812 0.31812 0.81139-0.62694
   4   0  -425214.28 1202.88   1-0.05460 0.27617 0.95523-0.95523-0.29075 0.10606
   4   0  -372876.74 1849.30   1 0.47516-0.24950 0.70820-0.70820 0.52217-0.66044
   4   0  -376241.38 1920.46   1 0.56866-0.34331-0.47194 0.47194 0.67370-0.81203
  -4   0   376423.23 1906.68   1 0.39870-0.62404-0.16484 0.16484 0.90214-0.76380
   4   0  -365969.69 1794.99   1-0.03390 0.25985 0.95050-0.95050-0.30885 0.17034
   4   0  -238761.76 1681.19   1 0.46922-0.23925-0.28096 0.28096 0.83718-0.92941
  -4   0   237445.00 1611.49   1 0.25402-0.48390 0.04578-0.04578 0.96611-0.87391
   4   0  -233998.10 1584.66   1-0.00134 0.23168 0.94157-0.94157-0.33679 0.24445
  -4   0   1909118.5 7127.61   1 0.04930-0.28388 0.49046-0.49046 0.87006-0.82392
   4   0  -1834958.0 6489.22   1-0.06641 0.30056-0.28321 0.28321-0.95675 0.91074
  -4   0   0237566.9 1961.94   1-0.11952-0.11952 0.36136-0.36136 0.92473-0.92473
  -4   0   0235675.1 1916.16   1-0.11930-0.11930-0.21943 0.21943-0.96830 0.96830
   4   0   0229502.1 1876.98   1 0.11917 0.11917-0.48801 0.48801-0.86466 0.86466
  -4   0   0241856.7 2094.68   1-0.11955-0.11955 0.96528-0.96528-0.23223 0.23223
   4   0   0237426.1 1995.13   1 0.11949 0.11949 0.89209-0.89209-0.43576 0.43576
  -4   0  -1 2700.01  266.72   1-0.30259 0.05919 0.19488-0.19488 0.93298-0.97903
   4   0   1 2846.76  348.80   1-0.04552 0.28906 0.42066-0.42066 0.90607-0.85993
  -4   0  -1 2456.35  406.72   1 0.04641-0.28918-0.41160 0.41160-0.91017 0.86426
   4   0   1 2038.26  318.07   1 0.26472-0.02170-0.62529 0.62529-0.73411 0.78008
  -4   0  -1 3684.32  583.35   1-0.07430-0.16919 0.95905-0.95905-0.27328 0.22711
   4   0   1 2347.03  421.53   1 0.22307 0.02038 0.82960-0.82960-0.51185 0.55797
   4   0   2108658.7 2720.08   1-0.20672 0.45458 0.28548-0.28548 0.93582-0.84371
   4   0   298373.48 2455.57   1 0.47010-0.22217-0.01227 0.01227-0.88252 0.97492
  -4   0  -299401.42 2479.06   1 0.16684-0.41431-0.53519 0.53519-0.82808 0.73614
   4   0   295351.54 2381.15   1 0.36621-0.11875-0.70593 0.70593-0.60624 0.69824
  -4   0  -2100268.0 2489.07   1-0.02235-0.22551 0.94754-0.94754-0.31884 0.22649
   4   0   320501.80 1820.98   1 0.59712-0.34496 0.15365-0.15365-0.78729 0.92595
  -4   0  -316795.56 1486.83   1 0.34465-0.59698-0.15141 0.15141-0.92643 0.78783
  -4   0  -318632.68 1675.05   1 0.24801-0.49993-0.61064 0.61064-0.75206 0.61414
   4   0   316192.27 1442.52   1 0.43509-0.18316-0.75190 0.75190-0.49531 0.63331
  -4   0  -318046.60 1595.06   1 0.04012-0.29241 0.92720-0.92720-0.37239 0.23405
   4   0   319165.83 1681.32   1 0.54315-0.29099 0.47787-0.47787-0.69037 0.82882
   4   0   4 3657.08  392.92   1 0.67978-0.42323 0.28819-0.28819-0.67441 0.85896
  -4   0  -4 3257.99  333.34   1 0.44805-0.70479-0.03822 0.03822-0.89318 0.70838
  -4   0  -4 3804.56  579.73   1 0.30173-0.55809-0.65655 0.65655-0.69130 0.50741
   4   0   4 3263.83  368.29   1 0.48305-0.22661-0.77766 0.77766-0.40235 0.58641
  -4   0  -4 3237.18  320.08   1 0.11718-0.37390 0.89326-0.89326-0.43397 0.24952
   4   0   4 3724.11  342.38   1 0.70263-0.44631 0.09702-0.09702-0.70490 0.88959
   4   0   5246133.7 2161.09   1 0.72883-0.46782 0.39121-0.39121-0.56191 0.79252
  -4   0  -5238360.8 2047.40   1 0.52166-0.78252 0.05059-0.05059-0.85165 0.62055
  -4   0  -5243336.0 2207.26   1 0.33777-0.59860-0.68459 0.68459-0.64594 0.41593
  -4   0  -5246556.5 1964.34   1 0.21447-0.47550 0.83557-0.83557-0.50577 0.27515
   4   0   621480.46 1893.06   1 0.75515-0.48975 0.46843-0.46843-0.45860 0.73533
[truncated: 595,148 more chars]
